# Supplementary material for: Bridging GWAS to genes: an integrative multi-omics approach using cattle data
Source: Research Square preprint supplement (doi:10.21203/rs.3.rs-7693421/v1), 2025-10-14
Supplement: Supplementary file 1 [file 1712e51baa7f6315c90c3dc6.xlsx]

## Sheet: orthologus_Win100Kb_mam
input_number	input	input_ensg	ensg_number	ortholog_name	ortholog_ensg	description
1	ENSBTAG00000000973	ENSBTAG00000000973	1.1.1	KCNJ15	ENSG00000157551	potassium inwardly rectifying channel subfamily J member 15 [Source:HGNC Symbol;Acc:HGNC:6261]
2	ENSBTAG00000009214	ENSBTAG00000009214	2.1.1	ETS2	ENSG00000157557	ETS proto-oncogene 2, transcription factor [Source:HGNC Symbol;Acc:HGNC:3489]
3	ENSBTAG00000023377	ENSBTAG00000023377	3.1.1	SH3BP5	ENSG00000131370	SH3 domain binding protein 5 [Source:HGNC Symbol;Acc:HGNC:10827]
4	ENSBTAG00000000057	ENSBTAG00000000057	4.1.1	THBS3	ENSG00000169231	thrombospondin 3 [Source:HGNC Symbol;Acc:HGNC:11787]
5	ENSBTAG00000014841	ENSBTAG00000014841	5.1.1	GBA1	ENSG00000177628	glucosylceramidase beta 1 [Source:HGNC Symbol;Acc:HGNC:4177]
6	ENSBTAG00000003083	ENSBTAG00000003083	6.1.1	SLC50A1	ENSG00000169241	solute carrier family 50 member 1 [Source:HGNC Symbol;Acc:HGNC:30657]
7	ENSBTAG00000000900	ENSBTAG00000000900	7.1.1	LRRC8C	ENSG00000171488	leucine rich repeat containing 8 VRAC subunit C [Source:HGNC Symbol;Acc:HGNC:25075]
8	ENSBTAG00000020214	ENSBTAG00000020214	8.1.1	LRRC8B	ENSG00000197147	leucine rich repeat containing 8 VRAC subunit B [Source:HGNC Symbol;Acc:HGNC:30692]
10	ENSBTAG00000000505	ENSBTAG00000000505	10.1.1	KYAT3	ENSG00000137944	kynurenine aminotransferase 3 [Source:HGNC Symbol;Acc:HGNC:33238]
11	ENSBTAG00000005668	ENSBTAG00000005668	11.1.1	SLC39A8	ENSG00000138821	solute carrier family 39 member 8 [Source:HGNC Symbol;Acc:HGNC:20862]
12	ENSBTAG00000001545	ENSBTAG00000001545	12.1.1	SLC34A2	ENSG00000157765	solute carrier family 34 member 2 [Source:HGNC Symbol;Acc:HGNC:11020]
13	ENSBTAG00000010346	ENSBTAG00000010346	13.1.1	ENAM	ENSG00000132464	enamelin [Source:HGNC Symbol;Acc:HGNC:3344]
14	ENSBTAG00000011338	ENSBTAG00000011338	14.1.1	NREP	ENSG00000134986	neuronal regeneration related protein [Source:HGNC Symbol;Acc:HGNC:16834]
15	ENSBTAG00000001829	ENSBTAG00000001829	15.1.1	SLC17A9	ENSG00000101194	solute carrier family 17 member 9 [Source:HGNC Symbol;Acc:HGNC:16192]
17	ENSBTAG00000014249	ENSBTAG00000014249	17.1.1	IVNS1ABP	ENSG00000116679	influenza virus NS1A binding protein [Source:HGNC Symbol;Acc:HGNC:16951]
18	ENSBTAG00000016523	ENSBTAG00000016523	18.1.1	DNAH10	ENSG00000197653	dynein axonemal heavy chain 10 [Source:HGNC Symbol;Acc:HGNC:2941]
19	ENSBTAG00000010812	ENSBTAG00000010812	19.1.1	P2RX4	ENSG00000135124	purinergic receptor P2X 4 [Source:HGNC Symbol;Acc:HGNC:8535]
20	ENSBTAG00000053023	ENSBTAG00000053023	20.1.1	LRRC74B	ENSG00000187905	leucine rich repeat containing 74B [Source:HGNC Symbol;Acc:HGNC:34301]
22	ENSBTAG00000052414	ENSBTAG00000052414	22.1.1	HAP1	ENSG00000173805	huntingtin associated protein 1 [Source:HGNC Symbol;Acc:HGNC:4812]
23	ENSBTAG00000002657	ENSBTAG00000002657	23.1.1	NKIRAS2	ENSG00000168256	NFKB inhibitor interacting Ras like 2 [Source:HGNC Symbol;Acc:HGNC:17898]
24	ENSBTAG00000006982	ENSBTAG00000006982	24.1.1	RAB5C	ENSG00000108774	RAB5C, member RAS oncogene family [Source:HGNC Symbol;Acc:HGNC:9785]
25	ENSBTAG00000046580	ENSBTAG00000046580	25.1.1	DHX58	ENSG00000108771	DExH-box helicase 58 [Source:HGNC Symbol;Acc:HGNC:29517]
26	ENSBTAG00000000666	ENSBTAG00000000666	26.1.1	GHDC	ENSG00000167925	GH3 domain containing [Source:HGNC Symbol;Acc:HGNC:24438]
27	ENSBTAG00000010125	ENSBTAG00000010125	27.1.1	STAT5B	ENSG00000173757	signal transducer and activator of transcription 5B [Source:HGNC Symbol;Acc:HGNC:11367]
28	ENSBTAG00000021523	ENSBTAG00000021523	28.1.1	STAT3	ENSG00000168610	signal transducer and activator of transcription 3 [Source:HGNC Symbol;Acc:HGNC:11364]
29	ENSBTAG00000006089	ENSBTAG00000006089	29.1.1	MTNAP1	ENSG00000141219	mitochondrial nucleoid associated protein 1 [Source:HGNC Symbol;Acc:HGNC:29601]
30	ENSBTAG00000008294	ENSBTAG00000008294	30.1.1	KCNJ2	ENSG00000123700	potassium inwardly rectifying channel subfamily J member 2 [Source:HGNC Symbol;Acc:HGNC:6263]
31	ENSBTAG00000006937	ENSBTAG00000006937	31.1.1	ABCA10	ENSG00000154263	ATP binding cassette subfamily A member 10 [Source:HGNC Symbol;Acc:HGNC:30]
32	ENSBTAG00000006896	ENSBTAG00000006896	32.1.1	ABCA9	ENSG00000154258	ATP binding cassette subfamily A member 9 [Source:HGNC Symbol;Acc:HGNC:39]
33	ENSBTAG00000005730	ENSBTAG00000005730	33.1.1	GPAT4	ENSG00000158669	glycerol-3-phosphate acyltransferase 4 [Source:HGNC Symbol;Acc:HGNC:20880]
34	ENSBTAG00000001657	ENSBTAG00000001657	34.1.1	PICALM	ENSG00000073921	phosphatidylinositol binding clathrin assembly protein [Source:HGNC Symbol;Acc:HGNC:15514]

## Sheet: background_genes
input_number	input	input_ensg	ensg_number	ortholog_name	ortholog_ensg	description
1	ENSBTAG00000000005	ENSBTAG00000000005	1.1.1	GRK3	ENSG00000100077	G protein-coupled receptor kinase 3 [Source:HGNC Symbol;Acc:HGNC:290]
2	ENSBTAG00000000010	ENSBTAG00000000010	2.1.1	UBL7	ENSG00000138629	ubiquitin like 7 [Source:HGNC Symbol;Acc:HGNC:28221]
3	ENSBTAG00000000012	ENSBTAG00000000012	3.1.1	TTC33	ENSG00000113638	tetratricopeptide repeat domain 33 [Source:HGNC Symbol;Acc:HGNC:29959]
4	ENSBTAG00000000013	ENSBTAG00000000013	4.1.1	PRKAA1	ENSG00000132356	protein kinase AMP-activated catalytic subunit alpha 1 [Source:HGNC Symbol;Acc:HGNC:9376]
5	ENSBTAG00000000014	ENSBTAG00000000014	5.1.1	TXN2	ENSG00000100348	thioredoxin 2 [Source:HGNC Symbol;Acc:HGNC:17772]
6	ENSBTAG00000000015	ENSBTAG00000000015	6.1.1	FOXRED2	ENSG00000100350	FAD dependent oxidoreductase domain containing 2 [Source:HGNC Symbol;Acc:HGNC:26264]
7	ENSBTAG00000000019	ENSBTAG00000000019	7.1.1	SERINC1	ENSG00000111897	serine incorporator 1 [Source:HGNC Symbol;Acc:HGNC:13464]
8	ENSBTAG00000000021	ENSBTAG00000000021	8.1.1	WASHC3	ENSG00000120860	WASH complex subunit 3 [Source:HGNC Symbol;Acc:HGNC:24256]
9	ENSBTAG00000000022	ENSBTAG00000000022	9.1.1	NUP37	ENSG00000075188	nucleoporin 37 [Source:HGNC Symbol;Acc:HGNC:29929]
10	ENSBTAG00000000023	ENSBTAG00000000023	10.1.1	RNF2	ENSG00000121481	ring finger protein 2 [Source:HGNC Symbol;Acc:HGNC:10061]
11	ENSBTAG00000000024	ENSBTAG00000000024	11.1.1	DYM	ENSG00000141627	dymeclin [Source:HGNC Symbol;Acc:HGNC:21317]
12	ENSBTAG00000000025	ENSBTAG00000000025	12.1.1	RAB6A	ENSG00000175582	RAB6A, member RAS oncogene family [Source:HGNC Symbol;Acc:HGNC:9786]
13	ENSBTAG00000000026	ENSBTAG00000000026	13.1.1	VPS33B	ENSG00000184056	VPS33B late endosome and lysosome associated [Source:HGNC Symbol;Acc:HGNC:12712]
14	ENSBTAG00000000031	ENSBTAG00000000031	14.1.1	TRPV4	ENSG00000111199	transient receptor potential cation channel subfamily V member 4 [Source:HGNC Symbol;Acc:HGNC:18083]
15	ENSBTAG00000000032	ENSBTAG00000000032	15.1.1	ABI3	ENSG00000108798	ABI family member 3 [Source:HGNC Symbol;Acc:HGNC:29859]
16	ENSBTAG00000000033	ENSBTAG00000000033	16.1.1	PHOSPHO1	ENSG00000173868	phosphoethanolamine/phosphocholine phosphatase 1 [Source:HGNC Symbol;Acc:HGNC:16815]
17	ENSBTAG00000000037	ENSBTAG00000000037	17.1.1	CWC27	ENSG00000153015	CWC27 spliceosome associated cyclophilin [Source:HGNC Symbol;Acc:HGNC:10664]
18	ENSBTAG00000000039	ENSBTAG00000000039	18.1.1	SIRT7	ENSG00000187531	sirtuin 7 [Source:HGNC Symbol;Acc:HGNC:14935]
19	ENSBTAG00000000040	ENSBTAG00000000040	19.1.1	MAFG	ENSG00000197063	MAF bZIP transcription factor G [Source:HGNC Symbol;Acc:HGNC:6781]
20	ENSBTAG00000000042	ENSBTAG00000000042	20.1.1	PYCR1	ENSG00000183010	pyrroline-5-carboxylate reductase 1 [Source:HGNC Symbol;Acc:HGNC:9721]
21	ENSBTAG00000000046	ENSBTAG00000000046	21.1.1	SURF2	ENSG00000148291	surfeit 2 [Source:HGNC Symbol;Acc:HGNC:11475]
22	ENSBTAG00000000049	ENSBTAG00000000049	22.1.1	CCDC77	ENSG00000120647	coiled-coil domain containing 77 [Source:HGNC Symbol;Acc:HGNC:28203]
23	ENSBTAG00000000050	ENSBTAG00000000050	23.1.1	PSMG3	ENSG00000157778	proteasome assembly chaperone 3 [Source:HGNC Symbol;Acc:HGNC:22420]
24	ENSBTAG00000000052	ENSBTAG00000000052	24.1.1	PKNOX2	ENSG00000165495	PBX/knotted 1 homeobox 2 [Source:HGNC Symbol;Acc:HGNC:16714]
25	ENSBTAG00000000053	ENSBTAG00000000053	25.1.1	FILIP1	ENSG00000118407	filamin A interacting protein 1 [Source:HGNC Symbol;Acc:HGNC:21015]
26	ENSBTAG00000000054	ENSBTAG00000000054	26.1.1	SNAPC4	ENSG00000165684	small nuclear RNA activating complex polypeptide 4 [Source:HGNC Symbol;Acc:HGNC:11137]
27	ENSBTAG00000000056	ENSBTAG00000000056	27.1.1	STRADA	ENSG00000266173	STE20 related adaptor alpha [Source:HGNC Symbol;Acc:HGNC:30172]
28	ENSBTAG00000000057	ENSBTAG00000000057	28.1.1	THBS3	ENSG00000169231	thrombospondin 3 [Source:HGNC Symbol;Acc:HGNC:11787]
29	ENSBTAG00000000061	ENSBTAG00000000061	29.1.1	PCDH7	ENSG00000169851	protocadherin 7 [Source:HGNC Symbol;Acc:HGNC:8659]
30	ENSBTAG00000000062	ENSBTAG00000000062	30.1.1	RASL12	ENSG00000103710	RAS like family 12 [Source:HGNC Symbol;Acc:HGNC:30289]
31	ENSBTAG00000000064	ENSBTAG00000000064	31.1.1	FEN1	ENSG00000168496	flap structure-specific endonuclease 1 [Source:HGNC Symbol;Acc:HGNC:3650]
32	ENSBTAG00000000065	ENSBTAG00000000065	32.1.1	CRLS1	ENSG00000088766	cardiolipin synthase 1 [Source:HGNC Symbol;Acc:HGNC:16148]
33	ENSBTAG00000000067	ENSBTAG00000000067	33.1.1	SDF2L1	ENSG00000128228	stromal cell derived factor 2 like 1 [Source:HGNC Symbol;Acc:HGNC:10676]
34	ENSBTAG00000000072	ENSBTAG00000000072	34.1.1	TFB2M	ENSG00000162851	transcription factor B2, mitochondrial [Source:HGNC Symbol;Acc:HGNC:18559]
35	ENSBTAG00000000073	ENSBTAG00000000073	35.1.1	LRPAP1	ENSG00000163956	LDL receptor related protein associated protein 1 [Source:HGNC Symbol;Acc:HGNC:6701]
36	ENSBTAG00000000074	ENSBTAG00000000074	36.1.1	NFIA	ENSG00000162599	nuclear factor I A [Source:HGNC Symbol;Acc:HGNC:7784]
37	ENSBTAG00000000076	ENSBTAG00000000076	37.1.1	RECK	ENSG00000122707	reversion inducing cysteine rich protein with kazal motifs [Source:HGNC Symbol;Acc:HGNC:11345]
38	ENSBTAG00000000077	ENSBTAG00000000077	38.1.1	ADSL	ENSG00000239900	adenylosuccinate lyase [Source:HGNC Symbol;Acc:HGNC:291]
39	ENSBTAG00000000078	ENSBTAG00000000078	39.1.1	GLIPR2	ENSG00000122694	GLI pathogenesis related 2 [Source:HGNC Symbol;Acc:HGNC:18007]
40	ENSBTAG00000000079	ENSBTAG00000000079	40.1.1	CCSAP	ENSG00000154429	centriole, cilia and spindle associated protein [Source:HGNC Symbol;Acc:HGNC:29578]
41	ENSBTAG00000000080	ENSBTAG00000000080	41.1.1	GRWD1	ENSG00000105447	glutamate rich WD repeat containing 1 [Source:HGNC Symbol;Acc:HGNC:21270]
42	ENSBTAG00000000084	ENSBTAG00000000084	42.1.1	MRPS30	ENSG00000112996	mitochondrial ribosomal protein S30 [Source:HGNC Symbol;Acc:HGNC:8769]
43	ENSBTAG00000000087	ENSBTAG00000000087	43.1.1	HSD17B12	ENSG00000149084	hydroxysteroid 17-beta dehydrogenase 12 [Source:HGNC Symbol;Acc:HGNC:18646]
44	ENSBTAG00000000088	ENSBTAG00000000088	44.1.1	ALCAM	ENSG00000170017	activated leukocyte cell adhesion molecule [Source:HGNC Symbol;Acc:HGNC:400]
45	ENSBTAG00000000090	ENSBTAG00000000090	45.1.1	SEC31B	ENSG00000075826	SEC31 homolog B, COPII coat complex component [Source:HGNC Symbol;Acc:HGNC:23197]
46	ENSBTAG00000000091	ENSBTAG00000000091	46.1.1	NDUFB8	ENSG00000166136	NADH:ubiquinone oxidoreductase subunit B8 [Source:HGNC Symbol;Acc:HGNC:7703]
47	ENSBTAG00000000092	ENSBTAG00000000092	47.1.1	HIF1AN	ENSG00000166135	hypoxia inducible factor 1 subunit alpha inhibitor [Source:HGNC Symbol;Acc:HGNC:17113]
48	ENSBTAG00000000094	ENSBTAG00000000094	48.1.1	ATPAF1	ENSG00000123472	ATP synthase mitochondrial F1 complex assembly factor 1 [Source:HGNC Symbol;Acc:HGNC:18803]
49	ENSBTAG00000000095	ENSBTAG00000000095	49.1.1	CD274	ENSG00000120217	CD274 molecule [Source:HGNC Symbol;Acc:HGNC:17635]
50	ENSBTAG00000000097	ENSBTAG00000000097	50.1.1	EFCAB14	ENSG00000159658	EF-hand calcium binding domain 14 [Source:HGNC Symbol;Acc:HGNC:29051]
51	ENSBTAG00000000098	ENSBTAG00000000098	51.1.1	SETDB1	ENSG00000143379	SET domain bifurcated histone lysine methyltransferase 1 [Source:HGNC Symbol;Acc:HGNC:10761]
52	ENSBTAG00000000099	ENSBTAG00000000099	52.1.1	CERS2	ENSG00000143418	ceramide synthase 2 [Source:HGNC Symbol;Acc:HGNC:14076]
53	ENSBTAG00000000103	ENSBTAG00000000103	53.1.1	MRPL23	ENSG00000214026	mitochondrial ribosomal protein L23 [Source:HGNC Symbol;Acc:HGNC:10322]
54	ENSBTAG00000000105	ENSBTAG00000000105	54.1.1	RIT1	ENSG00000143622	Ras like without CAAX 1 [Source:HGNC Symbol;Acc:HGNC:10023]
55	ENSBTAG00000000108	ENSBTAG00000000108	55.1.1	KHDC4	ENSG00000132680	KH domain containing 4, pre-mRNA splicing factor [Source:HGNC Symbol;Acc:HGNC:29145]
56	ENSBTAG00000000109	ENSBTAG00000000109	56.1.1	NPTXR	ENSG00000221890	neuronal pentraxin receptor [Source:HGNC Symbol;Acc:HGNC:7954]
57	ENSBTAG00000000111	ENSBTAG00000000111	57.1.1	UGP2	ENSG00000169764	UDP-glucose pyrophosphorylase 2 [Source:HGNC Symbol;Acc:HGNC:12527]
58	ENSBTAG00000000113	ENSBTAG00000000113	58.1.1	ARHGEF2	ENSG00000116584	Rho/Rac guanine nucleotide exchange factor 2 [Source:HGNC Symbol;Acc:HGNC:682]
59	ENSBTAG00000000115	ENSBTAG00000000115	59.1.1	VPS54	ENSG00000143952	VPS54 subunit of GARP complex [Source:HGNC Symbol;Acc:HGNC:18652]
60	ENSBTAG00000000120	ENSBTAG00000000120	60.1.1	USP43	ENSG00000154914	ubiquitin specific peptidase 43 [Source:HGNC Symbol;Acc:HGNC:20072]
61	ENSBTAG00000000124	ENSBTAG00000000124	61.1.1	DHH	ENSG00000139549	desert hedgehog signaling molecule [Source:HGNC Symbol;Acc:HGNC:2865]
62	ENSBTAG00000000125	ENSBTAG00000000125	62.1.1	AFG2A	ENSG00000145375	AFG2 AAA ATPase homolog A [Source:HGNC Symbol;Acc:HGNC:18119]
63	ENSBTAG00000000130	ENSBTAG00000000130	63.1.1	TNFSF13	ENSG00000161955	TNF superfamily member 13 [Source:HGNC Symbol;Acc:HGNC:11928]
64	ENSBTAG00000000131	ENSBTAG00000000131	64.1.1	SENP3	ENSG00000161956	SUMO specific peptidase 3 [Source:HGNC Symbol;Acc:HGNC:17862]
65	ENSBTAG00000000132	ENSBTAG00000000132	65.1.1	EIF4A1	ENSG00000161960	eukaryotic translation initiation factor 4A1 [Source:HGNC Symbol;Acc:HGNC:3282]
66	ENSBTAG00000000133	ENSBTAG00000000133	66.1.1	CD68	ENSG00000129226	CD68 molecule [Source:HGNC Symbol;Acc:HGNC:1693]
67	ENSBTAG00000000134	ENSBTAG00000000134	67.1.1	MPDU1	ENSG00000129255	mannose-P-dolichol utilization defect 1 [Source:HGNC Symbol;Acc:HGNC:7207]
68	ENSBTAG00000000137	ENSBTAG00000000137	68.1.1	FRYL	ENSG00000075539	FRY like transcription coactivator [Source:HGNC Symbol;Acc:HGNC:29127]
69	ENSBTAG00000000139	ENSBTAG00000000139	69.1.1	KMT5A	ENSG00000183955	lysine methyltransferase 5A [Source:HGNC Symbol;Acc:HGNC:29489]
70	ENSBTAG00000000140	ENSBTAG00000000140	70.1.1	EPHX1	ENSG00000143819	epoxide hydrolase 1 [Source:HGNC Symbol;Acc:HGNC:3401]
71	ENSBTAG00000000141	ENSBTAG00000000141	71.1.1	NFU1	ENSG00000169599	NFU1 iron-sulfur cluster scaffold [Source:HGNC Symbol;Acc:HGNC:16287]
72	ENSBTAG00000000146	ENSBTAG00000000146	72.1.1	FARP1	ENSG00000152767	FERM, ARH/RhoGEF and pleckstrin domain protein 1 [Source:HGNC Symbol;Acc:HGNC:3591]
73	ENSBTAG00000000147	ENSBTAG00000000147	73.1.1	RIC8B	ENSG00000111785	RIC8 guanine nucleotide exchange factor B [Source:HGNC Symbol;Acc:HGNC:25555]
74	ENSBTAG00000000149	ENSBTAG00000000149	74.1.1	USP40	ENSG00000085982	ubiquitin specific peptidase 40 [Source:HGNC Symbol;Acc:HGNC:20069]
75	ENSBTAG00000000152	ENSBTAG00000000152	75.1.1	RANBP2	ENSG00000153201	RAN binding protein 2 [Source:HGNC Symbol;Acc:HGNC:9848]
76	ENSBTAG00000000153	ENSBTAG00000000153	76.1.1	LRFN3	ENSG00000126243	leucine rich repeat and fibronectin type III domain containing 3 [Source:HGNC Symbol;Acc:HGNC:28370]
77	ENSBTAG00000000157	ENSBTAG00000000157	77.1.1	CCDC138	ENSG00000163006	coiled-coil domain containing 138 [Source:HGNC Symbol;Acc:HGNC:26531]
78	ENSBTAG00000000160	ENSBTAG00000000160	78.1.1	CBS	ENSG00000160200	cystathionine beta-synthase [Source:HGNC Symbol;Acc:HGNC:1550]
79	ENSBTAG00000000162	ENSBTAG00000000162	79.1.1	ANAPC16	ENSG00000166295	anaphase promoting complex subunit 16 [Source:HGNC Symbol;Acc:HGNC:26976]
80	ENSBTAG00000000163	ENSBTAG00000000163	80.1.1	DDIT4	ENSG00000168209	DNA damage inducible transcript 4 [Source:HGNC Symbol;Acc:HGNC:24944]
81	ENSBTAG00000000169	ENSBTAG00000000169	81.1.1	ASZ1	ENSG00000154438	ankyrin repeat, SAM and basic leucine zipper domain containing 1 [Source:HGNC Symbol;Acc:HGNC:1350]
82	ENSBTAG00000000175	ENSBTAG00000000175	82.1.1	N4BP2	ENSG00000078177	NEDD4 binding protein 2 [Source:HGNC Symbol;Acc:HGNC:29851]
83	ENSBTAG00000000176	ENSBTAG00000000176	83.1.1	SP3	ENSG00000172845	Sp3 transcription factor [Source:HGNC Symbol;Acc:HGNC:11208]
84	ENSBTAG00000000177	ENSBTAG00000000177	84.1.1	MSLN	ENSG00000102854	mesothelin [Source:HGNC Symbol;Acc:HGNC:7371]
85	ENSBTAG00000000179	ENSBTAG00000000179	85.1.1	RPUSD1	ENSG00000007376	RNA pseudouridine synthase domain containing 1 [Source:HGNC Symbol;Acc:HGNC:14173]
86	ENSBTAG00000000181	ENSBTAG00000000181	86.1.1	SUSD3	ENSG00000157303	sushi domain containing 3 [Source:HGNC Symbol;Acc:HGNC:28391]
87	ENSBTAG00000000182	ENSBTAG00000000182	87.1.1	SPINT2	ENSG00000167642	serine peptidase inhibitor, Kunitz type 2 [Source:HGNC Symbol;Acc:HGNC:11247]
88	ENSBTAG00000000184	ENSBTAG00000000184	88.1.1	EIF2AK3	ENSG00000172071	eukaryotic translation initiation factor 2 alpha kinase 3 [Source:HGNC Symbol;Acc:HGNC:3255]
89	ENSBTAG00000000186	ENSBTAG00000000186	89.1.1	FLAD1	ENSG00000160688	flavin adenine dinucleotide synthetase 1 [Source:HGNC Symbol;Acc:HGNC:24671]
90	ENSBTAG00000000191	ENSBTAG00000000191	90.1.1	SLC25A20	ENSG00000178537	solute carrier family 25 member 20 [Source:HGNC Symbol;Acc:HGNC:1421]
91	ENSBTAG00000000197	ENSBTAG00000000197	91.1.1	TRMT10A	ENSG00000145331	tRNA methyltransferase 10A [Source:HGNC Symbol;Acc:HGNC:28403]
92	ENSBTAG00000000199	ENSBTAG00000000199	92.1.1	PDP1	ENSG00000164951	pyruvate dehydrogenase phosphatase catalytic subunit 1 [Source:HGNC Symbol;Acc:HGNC:9279]
93	ENSBTAG00000000201	ENSBTAG00000000201	93.1.1	LTN1	ENSG00000198862	listerin E3 ubiquitin protein ligase 1 [Source:HGNC Symbol;Acc:HGNC:13082]
94	ENSBTAG00000000202	ENSBTAG00000000202	94.1.1	SLC25A19	ENSG00000125454	solute carrier family 25 member 19 [Source:HGNC Symbol;Acc:HGNC:14409]
95	ENSBTAG00000000203	ENSBTAG00000000203	95.1.1	ATP6V1G1	ENSG00000136888	ATPase H+ transporting V1 subunit G1 [Source:HGNC Symbol;Acc:HGNC:864]
96	ENSBTAG00000000204	ENSBTAG00000000204	96.1.1	TMEM268	ENSG00000157693	transmembrane protein 268 [Source:HGNC Symbol;Acc:HGNC:24513]
97	ENSBTAG00000000205	ENSBTAG00000000205	97.1.1	MMD	ENSG00000108960	monocyte to macrophage differentiation associated [Source:HGNC Symbol;Acc:HGNC:7153]
98	ENSBTAG00000000210	ENSBTAG00000000210	98.1.1	ARHGAP31	ENSG00000031081	Rho GTPase activating protein 31 [Source:HGNC Symbol;Acc:HGNC:29216]
99	ENSBTAG00000000212	ENSBTAG00000000212	99.1.1	NADK	ENSG00000008130	NAD kinase [Source:HGNC Symbol;Acc:HGNC:29831]
100	ENSBTAG00000000213	ENSBTAG00000000213	100.1.1	TMEM39A	ENSG00000176142	transmembrane protein 39A [Source:HGNC Symbol;Acc:HGNC:25600]
101	ENSBTAG00000000215	ENSBTAG00000000215	101.1.1	GNB1	ENSG00000078369	G protein subunit beta 1 [Source:HGNC Symbol;Acc:HGNC:4396]
102	ENSBTAG00000000218	ENSBTAG00000000218	102.1.1	MAP2K5	ENSG00000137764	mitogen-activated protein kinase kinase 5 [Source:HGNC Symbol;Acc:HGNC:6845]
103	ENSBTAG00000000220	ENSBTAG00000000220	103.1.1	NEK10	ENSG00000163491	NIMA related kinase 10 [Source:HGNC Symbol;Acc:HGNC:18592]
105	ENSBTAG00000000222	ENSBTAG00000000222	105.1.1	ARID4B	ENSG00000054267	AT-rich interaction domain 4B [Source:HGNC Symbol;Acc:HGNC:15550]
106	ENSBTAG00000000223	ENSBTAG00000000223	106.1.1	PPM1B	ENSG00000138032	protein phosphatase, Mg2+/Mn2+ dependent 1B [Source:HGNC Symbol;Acc:HGNC:9276]
107	ENSBTAG00000000224	ENSBTAG00000000224	107.1.1	TSPAN15	ENSG00000099282	tetraspanin 15 [Source:HGNC Symbol;Acc:HGNC:23298]
108	ENSBTAG00000000225	ENSBTAG00000000225	108.1.1	POLB	ENSG00000070501	DNA polymerase beta [Source:HGNC Symbol;Acc:HGNC:9174]
109	ENSBTAG00000000231	ENSBTAG00000000231	109.1.1	BMPR1A	ENSG00000107779	bone morphogenetic protein receptor type 1A [Source:HGNC Symbol;Acc:HGNC:1076]
113	ENSBTAG00000000241	ENSBTAG00000000241	113.1.1	STAU1	ENSG00000124214	staufen double-stranded RNA binding protein 1 [Source:HGNC Symbol;Acc:HGNC:11370]
114	ENSBTAG00000000243	ENSBTAG00000000243	114.1.1	HEBP2	ENSG00000051620	heme binding protein 2 [Source:HGNC Symbol;Acc:HGNC:15716]
115	ENSBTAG00000000245	ENSBTAG00000000245	115.1.1	NHSL1	ENSG00000135540	NHS like 1 [Source:HGNC Symbol;Acc:HGNC:21021]
116	ENSBTAG00000000246	ENSBTAG00000000246	116.1.1	ME3	ENSG00000151376	malic enzyme 3 [Source:HGNC Symbol;Acc:HGNC:6985]
117	ENSBTAG00000000250	ENSBTAG00000000250	117.1.1	HDHD3	ENSG00000119431	haloacid dehalogenase like hydrolase domain containing 3 [Source:HGNC Symbol;Acc:HGNC:28171]
118	ENSBTAG00000000251	ENSBTAG00000000251	118.1.1	ALAD	ENSG00000148218	aminolevulinate dehydratase [Source:HGNC Symbol;Acc:HGNC:395]
119	ENSBTAG00000000252	ENSBTAG00000000252	119.1.1	POLE3	ENSG00000148229	DNA polymerase epsilon 3, accessory subunit [Source:HGNC Symbol;Acc:HGNC:13546]
120	ENSBTAG00000000253	ENSBTAG00000000253	120.1.1	PTPRF	ENSG00000142949	protein tyrosine phosphatase receptor type F [Source:HGNC Symbol;Acc:HGNC:9670]
121	ENSBTAG00000000256	ENSBTAG00000000256	121.1.1	TLE1	ENSG00000196781	TLE family member 1, transcriptional corepressor [Source:HGNC Symbol;Acc:HGNC:11837]
122	ENSBTAG00000000257	ENSBTAG00000000257	122.1.1	MRAP2	ENSG00000135324	melanocortin 2 receptor accessory protein 2 [Source:HGNC Symbol;Acc:HGNC:21232]
123	ENSBTAG00000000260	ENSBTAG00000000260	123.1.1	ZNRF2	ENSG00000180233	zinc and ring finger 2 [Source:HGNC Symbol;Acc:HGNC:22316]
124	ENSBTAG00000000265	ENSBTAG00000000265	124.1.1	SYNPR	ENSG00000163630	synaptoporin [Source:HGNC Symbol;Acc:HGNC:16507]
125	ENSBTAG00000000266	ENSBTAG00000000266	125.1.1	NAB1	ENSG00000138386	NGFI-A binding protein 1 [Source:HGNC Symbol;Acc:HGNC:7626]
126	ENSBTAG00000000267	ENSBTAG00000000267	126.1.1	SMG6	ENSG00000070366	SMG6 nonsense mediated mRNA decay factor [Source:HGNC Symbol;Acc:HGNC:17809]
127	ENSBTAG00000000271	ENSBTAG00000000271	127.1.1	MNS1	ENSG00000138587	meiosis specific nuclear structural 1 [Source:HGNC Symbol;Acc:HGNC:29636]
128	ENSBTAG00000000274	ENSBTAG00000000274	128.1.1	YKT6	ENSG00000106636	YKT6 v-SNARE homolog [Source:HGNC Symbol;Acc:HGNC:16959]
129	ENSBTAG00000000275	ENSBTAG00000000275	129.1.1	PARP11	ENSG00000111224	poly(ADP-ribose) polymerase family member 11 [Source:HGNC Symbol;Acc:HGNC:1186]
130	ENSBTAG00000000277	ENSBTAG00000000277	130.1.1	IL18	ENSG00000150782	interleukin 18 [Source:HGNC Symbol;Acc:HGNC:5986]
131	ENSBTAG00000000279	ENSBTAG00000000279	131.1.1	RAB26	ENSG00000167964	RAB26, member RAS oncogene family [Source:HGNC Symbol;Acc:HGNC:14259]
132	ENSBTAG00000000283	ENSBTAG00000000283	132.1.1	CSF1	ENSG00000184371	colony stimulating factor 1 [Source:HGNC Symbol;Acc:HGNC:2432]
133	ENSBTAG00000000284	ENSBTAG00000000284	133.1.1	NAALAD2	ENSG00000077616	N-acetylated alpha-linked acidic dipeptidase 2 [Source:HGNC Symbol;Acc:HGNC:14526]
134	ENSBTAG00000000285	ENSBTAG00000000285	134.1.1	GUF1	ENSG00000151806	GTP binding elongation factor GUF1 [Source:HGNC Symbol;Acc:HGNC:25799]
135	ENSBTAG00000000286	ENSBTAG00000000286	135.1.1	PFKM	ENSG00000152556	phosphofructokinase, muscle [Source:HGNC Symbol;Acc:HGNC:8877]
136	ENSBTAG00000000287	ENSBTAG00000000287	136.1.1	GNPDA2	ENSG00000163281	glucosamine-6-phosphate deaminase 2 [Source:HGNC Symbol;Acc:HGNC:21526]
137	ENSBTAG00000000288	ENSBTAG00000000288	137.1.1	UPF2	ENSG00000151461	UPF2 regulator of nonsense mediated mRNA decay [Source:HGNC Symbol;Acc:HGNC:17854]
138	ENSBTAG00000000289	ENSBTAG00000000289	138.1.1	ASB8	ENSG00000177981	ankyrin repeat and SOCS box containing 8 [Source:HGNC Symbol;Acc:HGNC:17183]
139	ENSBTAG00000000290	ENSBTAG00000000290	139.1.1	ATP11B	ENSG00000058063	ATPase phospholipid transporting 11B (putative) [Source:HGNC Symbol;Acc:HGNC:13553]
140	ENSBTAG00000000291	ENSBTAG00000000291	140.1.1	DHTKD1	ENSG00000181192	dehydrogenase E1 and transketolase domain containing 1 [Source:HGNC Symbol;Acc:HGNC:23537]
141	ENSBTAG00000000292	ENSBTAG00000000292	141.1.1	TCIRG1	ENSG00000110719	T cell immune regulator 1, ATPase H+ transporting V0 subunit a3 [Source:HGNC Symbol;Acc:HGNC:11647]
142	ENSBTAG00000000295	ENSBTAG00000000295	142.1.1	CLHC1	ENSG00000162994	clathrin heavy chain linker domain containing 1 [Source:HGNC Symbol;Acc:HGNC:26453]
143	ENSBTAG00000000296	ENSBTAG00000000296	143.1.1	IMPDH1	ENSG00000106348	inosine monophosphate dehydrogenase 1 [Source:HGNC Symbol;Acc:HGNC:6052]
144	ENSBTAG00000000297	ENSBTAG00000000297	144.1.1	ZNF330	ENSG00000109445	zinc finger protein 330 [Source:HGNC Symbol;Acc:HGNC:15462]
145	ENSBTAG00000000305	ENSBTAG00000000305	145.1.1	LMO4	ENSG00000143013	LIM domain only 4 [Source:HGNC Symbol;Acc:HGNC:6644]
146	ENSBTAG00000000306	ENSBTAG00000000306	146.1.1	ITK	ENSG00000113263	IL2 inducible T cell kinase [Source:HGNC Symbol;Acc:HGNC:6171]
147	ENSBTAG00000000308	ENSBTAG00000000308	147.1.1	ITCH	ENSG00000078747	itchy E3 ubiquitin protein ligase [Source:HGNC Symbol;Acc:HGNC:13890]
148	ENSBTAG00000000309	ENSBTAG00000000309	148.1.1	PTPRT	ENSG00000196090	protein tyrosine phosphatase receptor type T [Source:HGNC Symbol;Acc:HGNC:9682]
149	ENSBTAG00000000310	ENSBTAG00000000310	149.1.1	MFAP5	ENSG00000197614	microfibril associated protein 5 [Source:HGNC Symbol;Acc:HGNC:29673]
150	ENSBTAG00000000312	ENSBTAG00000000312	150.1.1	GRINA	ENSG00000178719	glutamate ionotropic receptor NMDA type subunit associated protein 1 [Source:HGNC Symbol;Acc:HGNC:4589]
151	ENSBTAG00000000313	ENSBTAG00000000313	151.1.1	NUDT13	ENSG00000166321	nudix hydrolase 13 [Source:HGNC Symbol;Acc:HGNC:18827]
152	ENSBTAG00000000315	ENSBTAG00000000315	152.1.1	ECD	ENSG00000122882	ecdysoneless cell cycle regulator [Source:HGNC Symbol;Acc:HGNC:17029]
153	ENSBTAG00000000317	ENSBTAG00000000317	153.1.1	MAPK8IP1	ENSG00000121653	mitogen-activated protein kinase 8 interacting protein 1 [Source:HGNC Symbol;Acc:HGNC:6882]
154	ENSBTAG00000000320	ENSBTAG00000000320	154.1.1	UBAP1	ENSG00000165006	ubiquitin associated protein 1 [Source:HGNC Symbol;Acc:HGNC:12461]
155	ENSBTAG00000000321	ENSBTAG00000000321	155.1.1	TBL2	ENSG00000106638	transducin beta like 2 [Source:HGNC Symbol;Acc:HGNC:11586]
156	ENSBTAG00000000322	ENSBTAG00000000322	156.1.1	CD2AP	ENSG00000198087	CD2 associated protein [Source:HGNC Symbol;Acc:HGNC:14258]
157	ENSBTAG00000000329	ENSBTAG00000000329	157.1.1	MEGF10	ENSG00000145794	multiple EGF like domains 10 [Source:HGNC Symbol;Acc:HGNC:29634]
158	ENSBTAG00000000330	ENSBTAG00000000330	158.1.1	ALDH16A1	ENSG00000161618	aldehyde dehydrogenase 16 family member A1 [Source:HGNC Symbol;Acc:HGNC:28114]
159	ENSBTAG00000000332	ENSBTAG00000000332	159.1.1	ERF	ENSG00000105722	ETS2 repressor factor [Source:HGNC Symbol;Acc:HGNC:3444]
160	ENSBTAG00000000333	ENSBTAG00000000333	160.1.1	ARHGAP20	ENSG00000137727	Rho GTPase activating protein 20 [Source:HGNC Symbol;Acc:HGNC:18357]
161	ENSBTAG00000000340	ENSBTAG00000000340	161.1.1	ADNP	ENSG00000101126	activity dependent neuroprotector homeobox [Source:HGNC Symbol;Acc:HGNC:15766]
162	ENSBTAG00000000341	ENSBTAG00000000341	162.1.1	ISOC1	ENSG00000066583	isochorismatase domain containing 1 [Source:HGNC Symbol;Acc:HGNC:24254]
163	ENSBTAG00000000342	ENSBTAG00000000342	163.1.1	PLOD3	ENSG00000106397	procollagen-lysine,2-oxoglutarate 5-dioxygenase 3 [Source:HGNC Symbol;Acc:HGNC:9083]
164	ENSBTAG00000000343	ENSBTAG00000000343	164.1.1	ZNHIT1	ENSG00000106400	zinc finger HIT-type containing 1 [Source:HGNC Symbol;Acc:HGNC:21688]
165	ENSBTAG00000000345	ENSBTAG00000000345	165.1.1	CLDN15	ENSG00000106404	claudin 15 [Source:HGNC Symbol;Acc:HGNC:2036]
166	ENSBTAG00000000347	ENSBTAG00000000347	166.1.1	RHOG	ENSG00000177105	ras homolog family member G [Source:HGNC Symbol;Acc:HGNC:672]
167	ENSBTAG00000000355	ENSBTAG00000000355	167.1.1	OXLD1	ENSG00000204237	oxidoreductase like domain containing 1 [Source:HGNC Symbol;Acc:HGNC:27901]
168	ENSBTAG00000000356	ENSBTAG00000000356	168.1.1	CCDC137	ENSG00000185298	coiled-coil domain containing 137 [Source:HGNC Symbol;Acc:HGNC:33451]
169	ENSBTAG00000000357	ENSBTAG00000000357	169.1.1	PRAG1	ENSG00000275342	PEAK1 related, kinase-activating pseudokinase 1 [Source:HGNC Symbol;Acc:HGNC:25438]
170	ENSBTAG00000000359	ENSBTAG00000000359	170.1.1	EIF3J	ENSG00000104131	eukaryotic translation initiation factor 3 subunit J [Source:HGNC Symbol;Acc:HGNC:3270]
171	ENSBTAG00000000362	ENSBTAG00000000362	171.1.1	SPG11	ENSG00000104133	SPG11 vesicle trafficking associated, spatacsin [Source:HGNC Symbol;Acc:HGNC:11226]
172	ENSBTAG00000000363	ENSBTAG00000000363	172.1.1	BDP1	ENSG00000145734	B double prime 1, subunit of RNA polymerase III transcription initiation factor IIIB [Source:HGNC Symbol;Acc:HGNC:13652]
173	ENSBTAG00000000365	ENSBTAG00000000365	173.1.1	TDP2	ENSG00000111802	tyrosyl-DNA phosphodiesterase 2 [Source:HGNC Symbol;Acc:HGNC:17768]
174	ENSBTAG00000000369	ENSBTAG00000000369	174.1.1	EPS8	ENSG00000151491	EGFR pathway substrate 8, signaling adaptor [Source:HGNC Symbol;Acc:HGNC:3420]
175	ENSBTAG00000000371	ENSBTAG00000000371	175.1.1	DIS3L	ENSG00000166938	DIS3 like exosome 3'-5' exoribonuclease [Source:HGNC Symbol;Acc:HGNC:28698]
176	ENSBTAG00000000372	ENSBTAG00000000372	176.1.1	TIPIN	ENSG00000075131	TIMELESS interacting protein [Source:HGNC Symbol;Acc:HGNC:30750]
177	ENSBTAG00000000375	ENSBTAG00000000375	177.1.1	SSRP1	ENSG00000149136	structure specific recognition protein 1 [Source:HGNC Symbol;Acc:HGNC:11327]
178	ENSBTAG00000000376	ENSBTAG00000000376	178.1.1	P2RX3	ENSG00000109991	purinergic receptor P2X 3 [Source:HGNC Symbol;Acc:HGNC:8534]
179	ENSBTAG00000000379	ENSBTAG00000000379	179.1.1	GOLT1B	ENSG00000111711	golgi transport 1B [Source:HGNC Symbol;Acc:HGNC:20175]
181	ENSBTAG00000000382	ENSBTAG00000000382	181.1.1	MED27	ENSG00000160563	mediator complex subunit 27 [Source:HGNC Symbol;Acc:HGNC:2377]
182	ENSBTAG00000000385	ENSBTAG00000000385	182.1.1	ZBTB18	ENSG00000179456	zinc finger and BTB domain containing 18 [Source:HGNC Symbol;Acc:HGNC:13030]
183	ENSBTAG00000000387	ENSBTAG00000000387	183.1.1	NICN1	ENSG00000145029	nicolin 1, tubulin polyglutamylase complex subunit [Source:HGNC Symbol;Acc:HGNC:18317]
184	ENSBTAG00000000389	ENSBTAG00000000389	184.1.1	ZNF212	ENSG00000170260	zinc finger protein 212 [Source:HGNC Symbol;Acc:HGNC:13004]
185	ENSBTAG00000000390	ENSBTAG00000000390	185.1.1	TPST1	ENSG00000169902	tyrosylprotein sulfotransferase 1 [Source:HGNC Symbol;Acc:HGNC:12020]
186	ENSBTAG00000000392	ENSBTAG00000000392	186.1.1	ASCC1	ENSG00000138303	activating signal cointegrator 1 complex subunit 1 [Source:HGNC Symbol;Acc:HGNC:24268]
187	ENSBTAG00000000393	ENSBTAG00000000393	187.1.1	SSPN	ENSG00000123096	sarcospan [Source:HGNC Symbol;Acc:HGNC:11322]
188	ENSBTAG00000000394	ENSBTAG00000000394	188.1.1	BACE2	ENSG00000182240	beta-secretase 2 [Source:HGNC Symbol;Acc:HGNC:934]
189	ENSBTAG00000000396	ENSBTAG00000000396	189.1.1	PIM1	ENSG00000137193	Pim-1 proto-oncogene, serine/threonine kinase [Source:HGNC Symbol;Acc:HGNC:8986]
190	ENSBTAG00000000404	ENSBTAG00000000404	190.1.1	NAXE	ENSG00000163382	NAD(P)HX epimerase [Source:HGNC Symbol;Acc:HGNC:18453]
191	ENSBTAG00000000405	ENSBTAG00000000405	191.1.1	VKORC1	ENSG00000167397	vitamin K epoxide reductase complex subunit 1 [Source:HGNC Symbol;Acc:HGNC:23663]
192	ENSBTAG00000000406	ENSBTAG00000000406	192.1.1	GPATCH4	ENSG00000160818	G-patch domain containing 4 (gene/pseudogene) [Source:HGNC Symbol;Acc:HGNC:25982]
193	ENSBTAG00000000409	ENSBTAG00000000409	193.1.1	CDC40	ENSG00000168438	cell division cycle 40 [Source:HGNC Symbol;Acc:HGNC:17350]
194	ENSBTAG00000000411	ENSBTAG00000000411	194.1.1	HGS	ENSG00000185359	hepatocyte growth factor-regulated tyrosine kinase substrate [Source:HGNC Symbol;Acc:HGNC:4897]
195	ENSBTAG00000000413	ENSBTAG00000000413	195.1.1	NRTN	ENSG00000171119	neurturin [Source:HGNC Symbol;Acc:HGNC:8007]
196	ENSBTAG00000000414	ENSBTAG00000000414	196.1.1	FUT5	ENSG00000130383	fucosyltransferase 5 [Source:HGNC Symbol;Acc:HGNC:4016]
196	ENSBTAG00000000414	ENSBTAG00000000414	196.1.2	FUT6	ENSG00000156413	fucosyltransferase 6 [Source:HGNC Symbol;Acc:HGNC:4017]
196	ENSBTAG00000000414	ENSBTAG00000000414	196.1.3	FUT3	ENSG00000171124	fucosyltransferase 3 (Lewis blood group) [Source:HGNC Symbol;Acc:HGNC:4014]
197	ENSBTAG00000000415	ENSBTAG00000000415	197.1.1	ERBIN	ENSG00000112851	erbb2 interacting protein [Source:HGNC Symbol;Acc:HGNC:15842]
198	ENSBTAG00000000417	ENSBTAG00000000417	198.1.1	MRPL12	ENSG00000262814	mitochondrial ribosomal protein L12 [Source:HGNC Symbol;Acc:HGNC:10378]
199	ENSBTAG00000000418	ENSBTAG00000000418	199.1.1	TOX3	ENSG00000103460	TOX high mobility group box family member 3 [Source:HGNC Symbol;Acc:HGNC:11972]
200	ENSBTAG00000000421	ENSBTAG00000000421	200.1.1	EEA1	ENSG00000102189	early endosome antigen 1 [Source:HGNC Symbol;Acc:HGNC:3185]
201	ENSBTAG00000000422	ENSBTAG00000000422	201.1.1	TSHZ1	ENSG00000179981	teashirt zinc finger homeobox 1 [Source:HGNC Symbol;Acc:HGNC:10669]
202	ENSBTAG00000000423	ENSBTAG00000000423	202.1.1	RBM4B	ENSG00000173914	RNA binding motif protein 4B [Source:HGNC Symbol;Acc:HGNC:28842]
203	ENSBTAG00000000428	ENSBTAG00000000428	203.1.1	BAK1	ENSG00000030110	BCL2 antagonist/killer 1 [Source:HGNC Symbol;Acc:HGNC:949]
204	ENSBTAG00000000429	ENSBTAG00000000429	204.1.1	DGCR2	ENSG00000070413	DiGeorge syndrome critical region gene 2 [Source:HGNC Symbol;Acc:HGNC:2845]
205	ENSBTAG00000000434	ENSBTAG00000000434	205.1.1	CRYAB	ENSG00000109846	crystallin alpha B [Source:HGNC Symbol;Acc:HGNC:2389]
206	ENSBTAG00000000435	ENSBTAG00000000435	206.1.1	TARBP2	ENSG00000139546	TARBP2 subunit of RISC loading complex [Source:HGNC Symbol;Acc:HGNC:11569]
207	ENSBTAG00000000436	ENSBTAG00000000436	207.1.1	TNFAIP3	ENSG00000118503	TNF alpha induced protein 3 [Source:HGNC Symbol;Acc:HGNC:11896]
208	ENSBTAG00000000439	ENSBTAG00000000439	208.1.1	SFSWAP	ENSG00000061936	splicing factor SWAP [Source:HGNC Symbol;Acc:HGNC:10790]
209	ENSBTAG00000000440	ENSBTAG00000000440	209.1.1	HSPB2	ENSG00000170276	heat shock protein family B (small) member 2 [Source:HGNC Symbol;Acc:HGNC:5247]
210	ENSBTAG00000000442	ENSBTAG00000000442	210.1.1	RBP4	ENSG00000138207	retinol binding protein 4 [Source:HGNC Symbol;Acc:HGNC:9922]
211	ENSBTAG00000000445	ENSBTAG00000000445	211.1.1	PDE6C	ENSG00000095464	phosphodiesterase 6C [Source:HGNC Symbol;Acc:HGNC:8787]
212	ENSBTAG00000000446	ENSBTAG00000000446	212.1.1	ATP11A	ENSG00000068650	ATPase phospholipid transporting 11A [Source:HGNC Symbol;Acc:HGNC:13552]
213	ENSBTAG00000000447	ENSBTAG00000000447	213.1.1	FRA10AC1	ENSG00000148690	FRA10A associated CGG repeat 1 [Source:HGNC Symbol;Acc:HGNC:1162]
214	ENSBTAG00000000448	ENSBTAG00000000448	214.1.1	BDH1	ENSG00000161267	3-hydroxybutyrate dehydrogenase 1 [Source:HGNC Symbol;Acc:HGNC:1027]
215	ENSBTAG00000000451	ENSBTAG00000000451	215.1.1	TMEM126A	ENSG00000171202	transmembrane protein 126A [Source:HGNC Symbol;Acc:HGNC:25382]
216	ENSBTAG00000000454	ENSBTAG00000000454	216.1.1	TMEM106C	ENSG00000134291	transmembrane protein 106C [Source:HGNC Symbol;Acc:HGNC:28775]
217	ENSBTAG00000000455	ENSBTAG00000000455	217.1.1	CREBZF	ENSG00000137504	CREB/ATF bZIP transcription factor [Source:HGNC Symbol;Acc:HGNC:24905]
218	ENSBTAG00000000458	ENSBTAG00000000458	218.1.1	DYNC1LI2	ENSG00000135720	dynein cytoplasmic 1 light intermediate chain 2 [Source:HGNC Symbol;Acc:HGNC:2966]
219	ENSBTAG00000000459	ENSBTAG00000000459	219.1.1	POMGNT2	ENSG00000144647	protein O-linked mannose N-acetylglucosaminyltransferase 2 (beta 1,4-) [Source:HGNC Symbol;Acc:HGNC:25902]
220	ENSBTAG00000000460	ENSBTAG00000000460	220.1.1	SYTL2	ENSG00000137501	synaptotagmin like 2 [Source:HGNC Symbol;Acc:HGNC:15585]
221	ENSBTAG00000000462	ENSBTAG00000000462	221.1.1	CCDC102A	ENSG00000135736	coiled-coil domain containing 102A [Source:HGNC Symbol;Acc:HGNC:28097]
222	ENSBTAG00000000469	ENSBTAG00000000469	222.1.1	PPP2CA	ENSG00000113575	protein phosphatase 2 catalytic subunit alpha [Source:HGNC Symbol;Acc:HGNC:9299]
223	ENSBTAG00000000472	ENSBTAG00000000472	223.1.1	ZNF570	ENSG00000171827	zinc finger protein 570 [Source:HGNC Symbol;Acc:HGNC:26416]
224	ENSBTAG00000000473	ENSBTAG00000000473	224.1.1	ATP10D	ENSG00000145246	ATPase phospholipid transporting 10D (putative) [Source:HGNC Symbol;Acc:HGNC:13549]
225	ENSBTAG00000000475	ENSBTAG00000000475	225.1.1	IMMP1L	ENSG00000148950	inner mitochondrial membrane peptidase subunit 1 [Source:HGNC Symbol;Acc:HGNC:26317]
226	ENSBTAG00000000477	ENSBTAG00000000477	226.1.1	TLR5	ENSG00000187554	toll like receptor 5 [Source:HGNC Symbol;Acc:HGNC:11851]
227	ENSBTAG00000000478	ENSBTAG00000000478	227.1.1	LSMEM2	ENSG00000179564	leucine rich single-pass membrane protein 2 [Source:HGNC Symbol;Acc:HGNC:26781]
228	ENSBTAG00000000480	ENSBTAG00000000480	228.1.1	IFRD2	ENSG00000214706	interferon related developmental regulator 2 [Source:HGNC Symbol;Acc:HGNC:5457]
229	ENSBTAG00000000483	ENSBTAG00000000483	229.1.1	HYAL1	ENSG00000114378	hyaluronidase 1 [Source:HGNC Symbol;Acc:HGNC:5320]
230	ENSBTAG00000000484	ENSBTAG00000000484	230.1.1	HYAL2	ENSG00000068001	hyaluronidase 2 [Source:HGNC Symbol;Acc:HGNC:5321]
231	ENSBTAG00000000489	ENSBTAG00000000489	231.1.1	WDR54	ENSG00000005448	WD repeat domain 54 [Source:HGNC Symbol;Acc:HGNC:25770]
232	ENSBTAG00000000490	ENSBTAG00000000490	232.1.1	RTKN	ENSG00000114993	rhotekin [Source:HGNC Symbol;Acc:HGNC:10466]
234	ENSBTAG00000000494	ENSBTAG00000000494	234.1.1	PDE4D	ENSG00000113448	phosphodiesterase 4D [Source:HGNC Symbol;Acc:HGNC:8783]
235	ENSBTAG00000000495	ENSBTAG00000000495	235.1.1	HAVCR2	ENSG00000135077	hepatitis A virus cellular receptor 2 [Source:HGNC Symbol;Acc:HGNC:18437]
236	ENSBTAG00000000496	ENSBTAG00000000496	236.1.1	SLC12A8	ENSG00000221955	solute carrier family 12 member 8 [Source:HGNC Symbol;Acc:HGNC:15595]
237	ENSBTAG00000000497	ENSBTAG00000000497	237.1.1	AKR1A1	ENSG00000117448	aldo-keto reductase family 1 member A1 [Source:HGNC Symbol;Acc:HGNC:380]
238	ENSBTAG00000000500	ENSBTAG00000000500	238.1.1	PINX1	ENSG00000254093	PIN2 (TERF1) interacting telomerase inhibitor 1 [Source:HGNC Symbol;Acc:HGNC:30046]
239	ENSBTAG00000000504	ENSBTAG00000000504	239.1.1	GTF2B	ENSG00000137947	general transcription factor IIB [Source:HGNC Symbol;Acc:HGNC:4648]
240	ENSBTAG00000000505	ENSBTAG00000000505	240.1.1	KYAT3	ENSG00000137944	kynurenine aminotransferase 3 [Source:HGNC Symbol;Acc:HGNC:33238]
241	ENSBTAG00000000507	ENSBTAG00000000507	241.1.1	NR4A1	ENSG00000123358	nuclear receptor subfamily 4 group A member 1 [Source:HGNC Symbol;Acc:HGNC:7980]
242	ENSBTAG00000000510	ENSBTAG00000000510	242.1.1	ATG101	ENSG00000123395	autophagy related 101 [Source:HGNC Symbol;Acc:HGNC:25679]
243	ENSBTAG00000000511	ENSBTAG00000000511	243.1.1	CNST	ENSG00000162852	consortin, connexin sorting protein [Source:HGNC Symbol;Acc:HGNC:26486]
244	ENSBTAG00000000512	ENSBTAG00000000512	244.1.1	SNTA1	ENSG00000101400	syntrophin alpha 1 [Source:HGNC Symbol;Acc:HGNC:11167]
245	ENSBTAG00000000517	ENSBTAG00000000517	245.1.1	ANKRD29	ENSG00000154065	ankyrin repeat domain 29 [Source:HGNC Symbol;Acc:HGNC:27110]
246	ENSBTAG00000000521	ENSBTAG00000000521	246.1.1	PLEKHA8	ENSG00000106086	pleckstrin homology domain containing A8 [Source:HGNC Symbol;Acc:HGNC:30037]
247	ENSBTAG00000000526	ENSBTAG00000000526	247.1.1	TOPBP1	ENSG00000163781	DNA topoisomerase II binding protein 1 [Source:HGNC Symbol;Acc:HGNC:17008]
248	ENSBTAG00000000527	ENSBTAG00000000527	248.1.1	ZFAND3	ENSG00000156639	zinc finger AN1-type containing 3 [Source:HGNC Symbol;Acc:HGNC:18019]
249	ENSBTAG00000000528	ENSBTAG00000000528	249.1.1	MANBAL	ENSG00000101363	mannosidase beta like [Source:HGNC Symbol;Acc:HGNC:15799]
250	ENSBTAG00000000529	ENSBTAG00000000529	250.1.1	BTBD9	ENSG00000183826	BTB domain containing 9 [Source:HGNC Symbol;Acc:HGNC:21228]
252	ENSBTAG00000000533	ENSBTAG00000000533	252.1.1	ZNF684	ENSG00000117010	zinc finger protein 684 [Source:HGNC Symbol;Acc:HGNC:28418]
253	ENSBTAG00000000535	ENSBTAG00000000535	253.1.1	PCNX2	ENSG00000135749	pecanex 2 [Source:HGNC Symbol;Acc:HGNC:8736]
254	ENSBTAG00000000536	ENSBTAG00000000536	254.1.1	ZNF395	ENSG00000186918	zinc finger protein 395 [Source:HGNC Symbol;Acc:HGNC:18737]
255	ENSBTAG00000000539	ENSBTAG00000000539	255.1.1	LRRC28	ENSG00000168904	leucine rich repeat containing 28 [Source:HGNC Symbol;Acc:HGNC:28355]
256	ENSBTAG00000000540	ENSBTAG00000000540	256.1.1	RNF112	ENSG00000128482	ring finger protein 112 [Source:HGNC Symbol;Acc:HGNC:12968]
257	ENSBTAG00000000542	ENSBTAG00000000542	257.1.1	CFAP36	ENSG00000163001	cilia and flagella associated protein 36 [Source:HGNC Symbol;Acc:HGNC:30540]
258	ENSBTAG00000000545	ENSBTAG00000000545	258.1.1	PPP4R3B	ENSG00000275052	protein phosphatase 4 regulatory subunit 3B [Source:HGNC Symbol;Acc:HGNC:29267]
259	ENSBTAG00000000546	ENSBTAG00000000546	259.1.1	TOB1	ENSG00000141232	transducer of ERBB2, 1 [Source:HGNC Symbol;Acc:HGNC:11979]
260	ENSBTAG00000000548	ENSBTAG00000000548	260.1.1	KLHDC10	ENSG00000128607	kelch domain containing 10 [Source:HGNC Symbol;Acc:HGNC:22194]
261	ENSBTAG00000000550	ENSBTAG00000000550	261.1.1	ATP5F1D	ENSG00000099624	ATP synthase F1 subunit delta [Source:HGNC Symbol;Acc:HGNC:837]
262	ENSBTAG00000000551	ENSBTAG00000000551	262.1.1	SMNDC1	ENSG00000119953	survival motor neuron domain containing 1 [Source:HGNC Symbol;Acc:HGNC:16900]
263	ENSBTAG00000000555	ENSBTAG00000000555	263.1.1	ACO1	ENSG00000122729	aconitase 1 [Source:HGNC Symbol;Acc:HGNC:117]
264	ENSBTAG00000000559	ENSBTAG00000000559	264.1.1	PLTP	ENSG00000100979	phospholipid transfer protein [Source:HGNC Symbol;Acc:HGNC:9093]
265	ENSBTAG00000000561	ENSBTAG00000000561	265.1.1	OCLN	ENSG00000197822	occludin [Source:HGNC Symbol;Acc:HGNC:8104]
266	ENSBTAG00000000562	ENSBTAG00000000562	266.1.1	TOMM20	ENSG00000173726	translocase of outer mitochondrial membrane 20 [Source:HGNC Symbol;Acc:HGNC:20947]
267	ENSBTAG00000000563	ENSBTAG00000000563	267.1.1	MYD88	ENSG00000172936	MYD88 innate immune signal transduction adaptor [Source:HGNC Symbol;Acc:HGNC:7562]
268	ENSBTAG00000000565	ENSBTAG00000000565	268.1.1	RFX7	ENSG00000181827	regulatory factor X7 [Source:HGNC Symbol;Acc:HGNC:25777]
269	ENSBTAG00000000566	ENSBTAG00000000566	269.1.1	CCDC14	ENSG00000175455	coiled-coil domain containing 14 [Source:HGNC Symbol;Acc:HGNC:25766]
270	ENSBTAG00000000569	ENSBTAG00000000569	270.1.1	HES1	ENSG00000114315	hes family bHLH transcription factor 1 [Source:HGNC Symbol;Acc:HGNC:5192]
271	ENSBTAG00000000570	ENSBTAG00000000570	271.1.1	RET	ENSG00000165731	ret proto-oncogene [Source:HGNC Symbol;Acc:HGNC:9967]
272	ENSBTAG00000000571	ENSBTAG00000000571	272.1.1	ARHGAP27	ENSG00000159314	Rho GTPase activating protein 27 [Source:HGNC Symbol;Acc:HGNC:31813]
273	ENSBTAG00000000575	ENSBTAG00000000575	273.1.1	TNC	ENSG00000041982	tenascin C [Source:HGNC Symbol;Acc:HGNC:5318]
274	ENSBTAG00000000578	ENSBTAG00000000578	274.1.1	ABHD16A	ENSG00000204427	abhydrolase domain containing 16A, phospholipase [Source:HGNC Symbol;Acc:HGNC:13921]
275	ENSBTAG00000000579	ENSBTAG00000000579	275.1.1	NIPBL	ENSG00000164190	NIPBL cohesin loading factor [Source:HGNC Symbol;Acc:HGNC:28862]
276	ENSBTAG00000000581	ENSBTAG00000000581	276.1.1	DOCK10	ENSG00000135905	dedicator of cytokinesis 10 [Source:HGNC Symbol;Acc:HGNC:23479]
277	ENSBTAG00000000586	ENSBTAG00000000586	277.1.1	CPLANE1	ENSG00000197603	ciliogenesis and planar polarity effector complex subunit 1 [Source:HGNC Symbol;Acc:HGNC:25801]
278	ENSBTAG00000000588	ENSBTAG00000000588	278.1.1	CHODL	ENSG00000154645	chondrolectin [Source:HGNC Symbol;Acc:HGNC:17807]
279	ENSBTAG00000000590	ENSBTAG00000000590	279.1.1	POLE	ENSG00000177084	DNA polymerase epsilon, catalytic subunit [Source:HGNC Symbol;Acc:HGNC:9177]
280	ENSBTAG00000000593	ENSBTAG00000000593	280.1.1	ST8SIA1	ENSG00000111728	ST8 alpha-N-acetyl-neuraminide alpha-2,8-sialyltransferase 1 [Source:HGNC Symbol;Acc:HGNC:10869]
281	ENSBTAG00000000595	ENSBTAG00000000595	281.1.1	FBN3	ENSG00000142449	fibrillin 3 [Source:HGNC Symbol;Acc:HGNC:18794]
282	ENSBTAG00000000597	ENSBTAG00000000597	282.1.1	TMPRSS15	ENSG00000154646	transmembrane serine protease 15 [Source:HGNC Symbol;Acc:HGNC:9490]
283	ENSBTAG00000000598	ENSBTAG00000000598	283.1.1	CST3	ENSG00000101439	cystatin C [Source:HGNC Symbol;Acc:HGNC:2475]
284	ENSBTAG00000000599	ENSBTAG00000000599	284.1.1	CCNI	ENSG00000118816	cyclin I [Source:HGNC Symbol;Acc:HGNC:1595]
285	ENSBTAG00000000601	ENSBTAG00000000601	285.1.1	COL11A2	ENSG00000204248	collagen type XI alpha 2 chain [Source:HGNC Symbol;Acc:HGNC:2187]
286	ENSBTAG00000000602	ENSBTAG00000000602	286.1.1	RXRB	ENSG00000204231	retinoid X receptor beta [Source:HGNC Symbol;Acc:HGNC:10478]
287	ENSBTAG00000000603	ENSBTAG00000000603	287.1.1	JAM2	ENSG00000154721	junctional adhesion molecule 2 [Source:HGNC Symbol;Acc:HGNC:14686]
288	ENSBTAG00000000604	ENSBTAG00000000604	288.1.1	GPNMB	ENSG00000136235	glycoprotein nmb [Source:HGNC Symbol;Acc:HGNC:4462]
289	ENSBTAG00000000605	ENSBTAG00000000605	289.1.1	ATP5PF	ENSG00000154723	ATP synthase peripheral stalk subunit F6 [Source:HGNC Symbol;Acc:HGNC:847]
290	ENSBTAG00000000607	ENSBTAG00000000607	290.1.1	ABCF2	ENSG00000033050	ATP binding cassette subfamily F member 2 [Source:HGNC Symbol;Acc:HGNC:71]
291	ENSBTAG00000000608	ENSBTAG00000000608	291.1.1	PRCC	ENSG00000143294	proline rich mitotic checkpoint control factor [Source:HGNC Symbol;Acc:HGNC:9343]
292	ENSBTAG00000000613	ENSBTAG00000000613	292.1.1	ELAVL1	ENSG00000066044	ELAV like RNA binding protein 1 [Source:HGNC Symbol;Acc:HGNC:3312]
293	ENSBTAG00000000616	ENSBTAG00000000616	293.1.1	GPR161	ENSG00000143147	G protein-coupled receptor 161 [Source:HGNC Symbol;Acc:HGNC:23694]
294	ENSBTAG00000000621	ENSBTAG00000000621	294.1.1	CATSPERG	ENSG00000099338	cation channel sperm associated auxiliary subunit gamma [Source:HGNC Symbol;Acc:HGNC:25243]
296	ENSBTAG00000000623	ENSBTAG00000000623	296.1.1	CPEB1	ENSG00000214575	cytoplasmic polyadenylation element binding protein 1 [Source:HGNC Symbol;Acc:HGNC:21744]
297	ENSBTAG00000000625	ENSBTAG00000000625	297.1.1	SMAD6	ENSG00000137834	SMAD family member 6 [Source:HGNC Symbol;Acc:HGNC:6772]
298	ENSBTAG00000000626	ENSBTAG00000000626	298.1.1	STK32A	ENSG00000169302	serine/threonine kinase 32A [Source:HGNC Symbol;Acc:HGNC:28317]
299	ENSBTAG00000000629	ENSBTAG00000000629	299.1.1	MMS22L	ENSG00000146263	MMS22 like, DNA repair protein [Source:HGNC Symbol;Acc:HGNC:21475]
300	ENSBTAG00000000630	ENSBTAG00000000630	300.1.1	LSM14A	ENSG00000257103	LSM14A mRNA processing body assembly factor [Source:HGNC Symbol;Acc:HGNC:24489]
302	ENSBTAG00000000634	ENSBTAG00000000634	302.1.1	MLPH	ENSG00000115648	melanophilin [Source:HGNC Symbol;Acc:HGNC:29643]
303	ENSBTAG00000000638	ENSBTAG00000000638	303.1.1	CDT1	ENSG00000167513	chromatin licensing and DNA replication factor 1 [Source:HGNC Symbol;Acc:HGNC:24576]
304	ENSBTAG00000000639	ENSBTAG00000000639	304.1.1	APRT	ENSG00000198931	adenine phosphoribosyltransferase [Source:HGNC Symbol;Acc:HGNC:626]
305	ENSBTAG00000000640	ENSBTAG00000000640	305.1.1	SELENOS	ENSG00000131871	selenoprotein S [Source:HGNC Symbol;Acc:HGNC:30396]
306	ENSBTAG00000000641	ENSBTAG00000000641	306.1.1	SKAP1	ENSG00000141293	src kinase associated phosphoprotein 1 [Source:HGNC Symbol;Acc:HGNC:15605]
307	ENSBTAG00000000642	ENSBTAG00000000642	307.1.1	INTS1	ENSG00000164880	integrator complex subunit 1 [Source:HGNC Symbol;Acc:HGNC:24555]
308	ENSBTAG00000000646	ENSBTAG00000000646	308.1.1	ANAPC4	ENSG00000053900	anaphase promoting complex subunit 4 [Source:HGNC Symbol;Acc:HGNC:19990]
309	ENSBTAG00000000647	ENSBTAG00000000647	309.1.1	SELENOO	ENSG00000073169	selenoprotein O [Source:HGNC Symbol;Acc:HGNC:30395]
310	ENSBTAG00000000648	ENSBTAG00000000648	310.1.1	ADAMTS5	ENSG00000154736	ADAM metallopeptidase with thrombospondin type 1 motif 5 [Source:HGNC Symbol;Acc:HGNC:221]
311	ENSBTAG00000000650	ENSBTAG00000000650	311.1.1	TUBGCP6	ENSG00000128159	tubulin gamma complex component 6 [Source:HGNC Symbol;Acc:HGNC:18127]
312	ENSBTAG00000000653	ENSBTAG00000000653	312.1.1	PPP1R16B	ENSG00000101445	protein phosphatase 1 regulatory subunit 16B [Source:HGNC Symbol;Acc:HGNC:15850]
313	ENSBTAG00000000654	ENSBTAG00000000654	313.1.1	ODAD2	ENSG00000169126	outer dynein arm docking complex subunit 2 [Source:HGNC Symbol;Acc:HGNC:25583]
314	ENSBTAG00000000655	ENSBTAG00000000655	314.1.1	MIPOL1	ENSG00000151338	mirror-image polydactyly 1 [Source:HGNC Symbol;Acc:HGNC:21460]
315	ENSBTAG00000000656	ENSBTAG00000000656	315.1.1	NFATC1	ENSG00000131196	nuclear factor of activated T cells 1 [Source:HGNC Symbol;Acc:HGNC:7775]
316	ENSBTAG00000000658	ENSBTAG00000000658	316.1.1	WDR97	ENSG00000179698	WD repeat domain 97 [Source:HGNC Symbol;Acc:HGNC:26959]
317	ENSBTAG00000000662	ENSBTAG00000000662	317.1.1	TCF20	ENSG00000100207	transcription factor 20 [Source:HGNC Symbol;Acc:HGNC:11631]
318	ENSBTAG00000000664	ENSBTAG00000000664	318.1.1	SLC22A15	ENSG00000163393	solute carrier family 22 member 15 [Source:HGNC Symbol;Acc:HGNC:20301]
319	ENSBTAG00000000666	ENSBTAG00000000666	319.1.1	GHDC	ENSG00000167925	GH3 domain containing [Source:HGNC Symbol;Acc:HGNC:24438]
320	ENSBTAG00000000668	ENSBTAG00000000668	320.1.1	SLC22A5	ENSG00000197375	solute carrier family 22 member 5 [Source:HGNC Symbol;Acc:HGNC:10969]
321	ENSBTAG00000000670	ENSBTAG00000000670	321.1.1	RRP9	ENSG00000114767	ribosomal RNA processing 9, U3 small nucleolar RNA binding protein [Source:HGNC Symbol;Acc:HGNC:16829]
322	ENSBTAG00000000671	ENSBTAG00000000671	322.1.1	PARP3	ENSG00000041880	poly(ADP-ribose) polymerase family member 3 [Source:HGNC Symbol;Acc:HGNC:273]
323	ENSBTAG00000000672	ENSBTAG00000000672	323.1.1	OTULINL	ENSG00000145569	OTU deubiquitinase with linear linkage specificity like [Source:HGNC Symbol;Acc:HGNC:25629]
324	ENSBTAG00000000675	ENSBTAG00000000675	324.1.1	PGS1	ENSG00000087157	phosphatidylglycerophosphate synthase 1 [Source:HGNC Symbol;Acc:HGNC:30029]
325	ENSBTAG00000000678	ENSBTAG00000000678	325.1.1	CSDE1	ENSG00000009307	cold shock domain containing E1 [Source:HGNC Symbol;Acc:HGNC:29905]
326	ENSBTAG00000000679	ENSBTAG00000000679	326.1.1	PGM3	ENSG00000013375	phosphoglucomutase 3 [Source:HGNC Symbol;Acc:HGNC:8907]
327	ENSBTAG00000000683	ENSBTAG00000000683	327.1.1	WDR37	ENSG00000047056	WD repeat domain 37 [Source:HGNC Symbol;Acc:HGNC:31406]
328	ENSBTAG00000000684	ENSBTAG00000000684	328.1.1	ARHGEF10L	ENSG00000074964	Rho guanine nucleotide exchange factor 10 like [Source:HGNC Symbol;Acc:HGNC:25540]
329	ENSBTAG00000000686	ENSBTAG00000000686	329.1.1	NANP	ENSG00000170191	N-acetylneuraminic acid phosphatase [Source:HGNC Symbol;Acc:HGNC:16140]
330	ENSBTAG00000000687	ENSBTAG00000000687	330.1.1	POC1B	ENSG00000139323	POC1 centriolar protein B [Source:HGNC Symbol;Acc:HGNC:30836]
331	ENSBTAG00000000694	ENSBTAG00000000694	331.1.1	TAF10	ENSG00000166337	TATA-box binding protein associated factor 10 [Source:HGNC Symbol;Acc:HGNC:11543]
332	ENSBTAG00000000695	ENSBTAG00000000695	332.1.1	UBAP2	ENSG00000137073	ubiquitin associated protein 2 [Source:HGNC Symbol;Acc:HGNC:14185]
333	ENSBTAG00000000696	ENSBTAG00000000696	333.1.1	ILK	ENSG00000166333	integrin linked kinase [Source:HGNC Symbol;Acc:HGNC:6040]
334	ENSBTAG00000000697	ENSBTAG00000000697	334.1.1	RRP8	ENSG00000132275	ribosomal RNA processing 8 [Source:HGNC Symbol;Acc:HGNC:29030]
335	ENSBTAG00000000700	ENSBTAG00000000700	335.1.1	PARVA	ENSG00000197702	parvin alpha [Source:HGNC Symbol;Acc:HGNC:14652]
336	ENSBTAG00000000704	ENSBTAG00000000704	336.1.1	GUSB	ENSG00000169919	glucuronidase beta [Source:HGNC Symbol;Acc:HGNC:4696]
337	ENSBTAG00000000705	ENSBTAG00000000705	337.1.1	COX7A2L	ENSG00000115944	cytochrome c oxidase subunit 7A2 like [Source:HGNC Symbol;Acc:HGNC:2289]
338	ENSBTAG00000000706	ENSBTAG00000000706	338.1.1	ADAMTS1	ENSG00000154734	ADAM metallopeptidase with thrombospondin type 1 motif 1 [Source:HGNC Symbol;Acc:HGNC:217]
339	ENSBTAG00000000710	ENSBTAG00000000710	339.1.1	PIP5K1C	ENSG00000186111	phosphatidylinositol-4-phosphate 5-kinase type 1 gamma [Source:HGNC Symbol;Acc:HGNC:8996]
340	ENSBTAG00000000711	ENSBTAG00000000711	340.1.1	NDRG1	ENSG00000104419	N-myc downstream regulated 1 [Source:HGNC Symbol;Acc:HGNC:7679]
341	ENSBTAG00000000712	ENSBTAG00000000712	341.1.1	FBXW2	ENSG00000119402	F-box and WD repeat domain containing 2 [Source:HGNC Symbol;Acc:HGNC:13608]
342	ENSBTAG00000000713	ENSBTAG00000000713	342.1.1	AGFG2	ENSG00000106351	ArfGAP with FG repeats 2 [Source:HGNC Symbol;Acc:HGNC:5177]
343	ENSBTAG00000000717	ENSBTAG00000000717	343.1.1	PLPP2	ENSG00000141934	phospholipid phosphatase 2 [Source:HGNC Symbol;Acc:HGNC:9230]
344	ENSBTAG00000000720	ENSBTAG00000000720	344.1.1	CTSL	ENSG00000135047	cathepsin L [Source:HGNC Symbol;Acc:HGNC:2537]
345	ENSBTAG00000000721	ENSBTAG00000000721	345.1.1	GPATCH1	ENSG00000076650	G-patch domain containing 1 [Source:HGNC Symbol;Acc:HGNC:24658]
346	ENSBTAG00000000725	ENSBTAG00000000725	346.1.1	USP42	ENSG00000106346	ubiquitin specific peptidase 42 [Source:HGNC Symbol;Acc:HGNC:20068]
347	ENSBTAG00000000727	ENSBTAG00000000727	347.1.1	RNF169	ENSG00000166439	ring finger protein 169 [Source:HGNC Symbol;Acc:HGNC:26961]
348	ENSBTAG00000000735	ENSBTAG00000000735	348.1.1	BCL2A1	ENSG00000140379	BCL2 related protein A1 [Source:HGNC Symbol;Acc:HGNC:991]
349	ENSBTAG00000000736	ENSBTAG00000000736	349.1.1	LRP8	ENSG00000157193	LDL receptor related protein 8 [Source:HGNC Symbol;Acc:HGNC:6700]
350	ENSBTAG00000000737	ENSBTAG00000000737	350.1.1	DMXL2	ENSG00000104093	Dmx like 2 [Source:HGNC Symbol;Acc:HGNC:2938]
351	ENSBTAG00000000738	ENSBTAG00000000738	351.1.1	DAPK1	ENSG00000196730	death associated protein kinase 1 [Source:HGNC Symbol;Acc:HGNC:2674]
352	ENSBTAG00000000742	ENSBTAG00000000742	352.1.1	AMOTL2	ENSG00000114019	angiomotin like 2 [Source:HGNC Symbol;Acc:HGNC:17812]
353	ENSBTAG00000000744	ENSBTAG00000000744	353.1.1	DCTN6	ENSG00000104671	dynactin subunit 6 [Source:HGNC Symbol;Acc:HGNC:16964]
354	ENSBTAG00000000745	ENSBTAG00000000745	354.1.1	AQP1	ENSG00000240583	aquaporin 1 (Colton blood group) [Source:HGNC Symbol;Acc:HGNC:633]
355	ENSBTAG00000000746	ENSBTAG00000000746	355.1.1	KAT2B	ENSG00000114166	lysine acetyltransferase 2B [Source:HGNC Symbol;Acc:HGNC:8638]
356	ENSBTAG00000000748	ENSBTAG00000000748	356.1.1	GAR1	ENSG00000109534	GAR1 ribonucleoprotein [Source:HGNC Symbol;Acc:HGNC:14264]
357	ENSBTAG00000000750	ENSBTAG00000000750	357.1.1	MSL2	ENSG00000174579	MSL complex subunit 2 [Source:HGNC Symbol;Acc:HGNC:25544]
358	ENSBTAG00000000753	ENSBTAG00000000753	358.1.1	PIAS4	ENSG00000105229	protein inhibitor of activated STAT 4 [Source:HGNC Symbol;Acc:HGNC:17002]
359	ENSBTAG00000000754	ENSBTAG00000000754	359.1.1	PPP2R5A	ENSG00000066027	protein phosphatase 2 regulatory subunit B'alpha [Source:HGNC Symbol;Acc:HGNC:9309]
360	ENSBTAG00000000759	ENSBTAG00000000759	360.1.1	NENF	ENSG00000117691	neudesin neurotrophic factor [Source:HGNC Symbol;Acc:HGNC:30384]
361	ENSBTAG00000000764	ENSBTAG00000000764	361.1.1	GIPC1	ENSG00000123159	GIPC PDZ domain containing family member 1 [Source:HGNC Symbol;Acc:HGNC:1226]
362	ENSBTAG00000000767	ENSBTAG00000000767	362.1.1	DCP2	ENSG00000172795	decapping mRNA 2 [Source:HGNC Symbol;Acc:HGNC:24452]
363	ENSBTAG00000000770	ENSBTAG00000000770	363.1.1	PGM2L1	ENSG00000165434	phosphoglucomutase 2 like 1 [Source:HGNC Symbol;Acc:HGNC:20898]
364	ENSBTAG00000000771	ENSBTAG00000000771	364.1.1	DNAJB6	ENSG00000105993	DnaJ heat shock protein family (Hsp40) member B6 [Source:HGNC Symbol;Acc:HGNC:14888]
365	ENSBTAG00000000773	ENSBTAG00000000773	365.1.1	TTC9C	ENSG00000162222	tetratricopeptide repeat domain 9C [Source:HGNC Symbol;Acc:HGNC:28432]
366	ENSBTAG00000000778	ENSBTAG00000000778	366.1.1	HSP90AB1	ENSG00000096384	heat shock protein 90 alpha family class B member 1 [Source:HGNC Symbol;Acc:HGNC:5258]
367	ENSBTAG00000000781	ENSBTAG00000000781	367.1.1	HIP1	ENSG00000127946	huntingtin interacting protein 1 [Source:HGNC Symbol;Acc:HGNC:4913]
368	ENSBTAG00000000782	ENSBTAG00000000782	368.1.1	KDR	ENSG00000128052	kinase insert domain receptor [Source:HGNC Symbol;Acc:HGNC:6307]
369	ENSBTAG00000000783	ENSBTAG00000000783	369.1.1	TGFA	ENSG00000163235	transforming growth factor alpha [Source:HGNC Symbol;Acc:HGNC:11765]
370	ENSBTAG00000000784	ENSBTAG00000000784	370.1.1	MTERF4	ENSG00000122085	mitochondrial transcription termination factor 4 [Source:HGNC Symbol;Acc:HGNC:28785]
371	ENSBTAG00000000785	ENSBTAG00000000785	371.1.1	PASK	ENSG00000115687	PAS domain containing serine/threonine kinase [Source:HGNC Symbol;Acc:HGNC:17270]
372	ENSBTAG00000000786	ENSBTAG00000000786	372.1.1	NQO2	ENSG00000124588	N-ribosyldihydronicotinamide:quinone dehydrogenase 2 [Source:HGNC Symbol;Acc:HGNC:7856]
374	ENSBTAG00000000793	ENSBTAG00000000793	374.1.1	LAMC2	ENSG00000058085	laminin subunit gamma 2 [Source:HGNC Symbol;Acc:HGNC:6493]
375	ENSBTAG00000000795	ENSBTAG00000000795	375.1.1	NMNAT2	ENSG00000157064	nicotinamide nucleotide adenylyltransferase 2 [Source:HGNC Symbol;Acc:HGNC:16789]
376	ENSBTAG00000000797	ENSBTAG00000000797	376.1.1	MRPL9	ENSG00000143436	mitochondrial ribosomal protein L9 [Source:HGNC Symbol;Acc:HGNC:14277]
377	ENSBTAG00000000799	ENSBTAG00000000799	377.1.1	ICA1	ENSG00000003147	islet cell autoantigen 1 [Source:HGNC Symbol;Acc:HGNC:5343]
379	ENSBTAG00000000802	ENSBTAG00000000802	379.1.1	LYVE1	ENSG00000133800	lymphatic vessel endothelial hyaluronan receptor 1 [Source:HGNC Symbol;Acc:HGNC:14687]
380	ENSBTAG00000000803	ENSBTAG00000000803	380.1.1	ZNF667	ENSG00000198046	zinc finger protein 667 [Source:HGNC Symbol;Acc:HGNC:28854]
381	ENSBTAG00000000804	ENSBTAG00000000804	381.1.1	MOB3B	ENSG00000120162	MOB kinase activator 3B [Source:HGNC Symbol;Acc:HGNC:23825]
382	ENSBTAG00000000806	ENSBTAG00000000806	382.1.1	ATAD1	ENSG00000138138	ATPase family AAA domain containing 1 [Source:HGNC Symbol;Acc:HGNC:25903]
383	ENSBTAG00000000807	ENSBTAG00000000807	383.1.1	TMED3	ENSG00000166557	transmembrane p24 trafficking protein 3 [Source:HGNC Symbol;Acc:HGNC:28889]
384	ENSBTAG00000000808	ENSBTAG00000000808	384.1.1	COX14	ENSG00000178449	cytochrome c oxidase assembly factor COX14 [Source:HGNC Symbol;Acc:HGNC:28216]
385	ENSBTAG00000000809	ENSBTAG00000000809	385.1.1	IRX1	ENSG00000170549	iroquois homeobox 1 [Source:HGNC Symbol;Acc:HGNC:14358]
386	ENSBTAG00000000810	ENSBTAG00000000810	386.1.1	COPE	ENSG00000105669	COPI coat complex subunit epsilon [Source:HGNC Symbol;Acc:HGNC:2234]
387	ENSBTAG00000000811	ENSBTAG00000000811	387.1.1	DDX49	ENSG00000105671	DEAD-box helicase 49 [Source:HGNC Symbol;Acc:HGNC:18684]
388	ENSBTAG00000000813	ENSBTAG00000000813	388.1.1	HOMER3	ENSG00000051128	homer scaffold protein 3 [Source:HGNC Symbol;Acc:HGNC:17514]
389	ENSBTAG00000000815	ENSBTAG00000000815	389.1.1	EPHA2	ENSG00000142627	EPH receptor A2 [Source:HGNC Symbol;Acc:HGNC:3386]
390	ENSBTAG00000000816	ENSBTAG00000000816	390.1.1	PRDM1	ENSG00000057657	PR/SET domain 1 [Source:HGNC Symbol;Acc:HGNC:9346]
391	ENSBTAG00000000817	ENSBTAG00000000817	391.1.1	SYNJ2	ENSG00000078269	synaptojanin 2 [Source:HGNC Symbol;Acc:HGNC:11504]
392	ENSBTAG00000000818	ENSBTAG00000000818	392.1.1	PLEKHG7	ENSG00000187510	pleckstrin homology and RhoGEF domain containing G7 [Source:HGNC Symbol;Acc:HGNC:33829]
393	ENSBTAG00000000819	ENSBTAG00000000819	393.1.1	RFX3	ENSG00000080298	regulatory factor X3 [Source:HGNC Symbol;Acc:HGNC:9984]
394	ENSBTAG00000000820	ENSBTAG00000000820	394.1.1	GNG11	ENSG00000127920	G protein subunit gamma 11 [Source:HGNC Symbol;Acc:HGNC:4403]
395	ENSBTAG00000000824	ENSBTAG00000000824	395.1.1	TSEN54	ENSG00000182173	tRNA splicing endonuclease subunit 54 [Source:HGNC Symbol;Acc:HGNC:27561]
396	ENSBTAG00000000825	ENSBTAG00000000825	396.1.1	MRPS26	ENSG00000125901	mitochondrial ribosomal protein S26 [Source:HGNC Symbol;Acc:HGNC:14045]
397	ENSBTAG00000000827	ENSBTAG00000000827	397.1.1	TAOK1	ENSG00000160551	TAO kinase 1 [Source:HGNC Symbol;Acc:HGNC:29259]
398	ENSBTAG00000000829	ENSBTAG00000000829	398.1.1	SHPK	ENSG00000197417	sedoheptulokinase [Source:HGNC Symbol;Acc:HGNC:1492]
399	ENSBTAG00000000830	ENSBTAG00000000830	399.1.1	GPR137B	ENSG00000077585	G protein-coupled receptor 137B [Source:HGNC Symbol;Acc:HGNC:11862]
400	ENSBTAG00000000831	ENSBTAG00000000831	400.1.1	CTNS	ENSG00000040531	cystinosin, lysosomal cystine transporter [Source:HGNC Symbol;Acc:HGNC:2518]
401	ENSBTAG00000000833	ENSBTAG00000000833	401.1.1	TAX1BP3	ENSG00000213977	Tax1 binding protein 3 [Source:HGNC Symbol;Acc:HGNC:30684]
402	ENSBTAG00000000835	ENSBTAG00000000835	402.1.1	BCAS1	ENSG00000064787	brain enriched myelin associated protein 1 [Source:HGNC Symbol;Acc:HGNC:974]
403	ENSBTAG00000000836	ENSBTAG00000000836	403.1.1	KRT8	ENSG00000170421	keratin 8 [Source:HGNC Symbol;Acc:HGNC:6446]
404	ENSBTAG00000000837	ENSBTAG00000000837	404.1.1	PARP1	ENSG00000143799	poly(ADP-ribose) polymerase 1 [Source:HGNC Symbol;Acc:HGNC:270]
405	ENSBTAG00000000838	ENSBTAG00000000838	405.1.1	CCDC88C	ENSG00000015133	coiled-coil domain containing 88C [Source:HGNC Symbol;Acc:HGNC:19967]
406	ENSBTAG00000000841	ENSBTAG00000000841	406.1.1	LZTS1	ENSG00000061337	leucine zipper tumor suppressor 1 [Source:HGNC Symbol;Acc:HGNC:13861]
407	ENSBTAG00000000842	ENSBTAG00000000842	407.1.1	UBASH3B	ENSG00000154127	ubiquitin associated and SH3 domain containing B [Source:HGNC Symbol;Acc:HGNC:29884]
408	ENSBTAG00000000843	ENSBTAG00000000843	408.1.1	NDRG2	ENSG00000165795	NDRG family member 2 [Source:HGNC Symbol;Acc:HGNC:14460]
409	ENSBTAG00000000848	ENSBTAG00000000848	409.1.1	SNRNP200	ENSG00000144028	small nuclear ribonucleoprotein U5 subunit 200 [Source:HGNC Symbol;Acc:HGNC:30859]
410	ENSBTAG00000000851	ENSBTAG00000000851	410.1.1	CYP20A1	ENSG00000119004	cytochrome P450 family 20 subfamily A member 1 [Source:HGNC Symbol;Acc:HGNC:20576]
411	ENSBTAG00000000854	ENSBTAG00000000854	411.1.1	SEC16B	ENSG00000120341	SEC16 homolog B, endoplasmic reticulum export factor [Source:HGNC Symbol;Acc:HGNC:30301]
412	ENSBTAG00000000855	ENSBTAG00000000855	412.1.1	NXN	ENSG00000167693	nucleoredoxin [Source:HGNC Symbol;Acc:HGNC:18008]
413	ENSBTAG00000000856	ENSBTAG00000000856	413.1.1	FBXL6	ENSG00000182325	F-box and leucine rich repeat protein 6 [Source:HGNC Symbol;Acc:HGNC:13603]
414	ENSBTAG00000000857	ENSBTAG00000000857	414.1.1	SLC52A1	ENSG00000132517	solute carrier family 52 member 1 [Source:HGNC Symbol;Acc:HGNC:30225]
414	ENSBTAG00000000857	ENSBTAG00000000857	414.1.2	SLC52A2	ENSG00000185803	solute carrier family 52 member 2 [Source:HGNC Symbol;Acc:HGNC:30224]
415	ENSBTAG00000000859	ENSBTAG00000000859	415.1.1	SLC38A1	ENSG00000111371	solute carrier family 38 member 1 [Source:HGNC Symbol;Acc:HGNC:13447]
416	ENSBTAG00000000868	ENSBTAG00000000868	416.1.1	ZFP1	ENSG00000184517	ZFP1 zinc finger protein [Source:HGNC Symbol;Acc:HGNC:23328]
417	ENSBTAG00000000871	ENSBTAG00000000871	417.1.1	TRIM27	ENSG00000204713	tripartite motif containing 27 [Source:HGNC Symbol;Acc:HGNC:9975]
418	ENSBTAG00000000873	ENSBTAG00000000873	418.1.1	SLC13A3	ENSG00000158296	solute carrier family 13 member 3 [Source:HGNC Symbol;Acc:HGNC:14430]
419	ENSBTAG00000000874	ENSBTAG00000000874	419.1.1	CAST	ENSG00000310517	calpastatin [Source:NCBI gene (formerly Entrezgene);Acc:831]
420	ENSBTAG00000000875	ENSBTAG00000000875	420.1.1	CEP131	ENSG00000141577	centrosomal protein 131 [Source:HGNC Symbol;Acc:HGNC:29511]
421	ENSBTAG00000000877	ENSBTAG00000000877	421.1.1	ETFBKMT	ENSG00000139160	electron transfer flavoprotein subunit beta lysine methyltransferase [Source:HGNC Symbol;Acc:HGNC:28739]
422	ENSBTAG00000000878	ENSBTAG00000000878	422.1.1	RB1CC1	ENSG00000023287	RB1 inducible coiled-coil 1 [Source:HGNC Symbol;Acc:HGNC:15574]
423	ENSBTAG00000000879	ENSBTAG00000000879	423.1.1	C8orf33	ENSG00000182307	chromosome 8 open reading frame 33 [Source:HGNC Symbol;Acc:HGNC:26104]
424	ENSBTAG00000000880	ENSBTAG00000000880	424.1.1	GINM1	ENSG00000055211	glycosylated integral membrane protein 1 [Source:HGNC Symbol;Acc:HGNC:21074]
425	ENSBTAG00000000892	ENSBTAG00000000892	425.1.1	CGAS	ENSG00000164430	cyclic GMP-AMP synthase [Source:HGNC Symbol;Acc:HGNC:21367]
426	ENSBTAG00000000897	ENSBTAG00000000897	426.1.1	IQGAP2	ENSG00000145703	IQ motif containing GTPase activating protein 2 [Source:HGNC Symbol;Acc:HGNC:6111]
427	ENSBTAG00000000898	ENSBTAG00000000898	427.1.1	F2RL2	ENSG00000164220	coagulation factor II thrombin receptor like 2 [Source:HGNC Symbol;Acc:HGNC:3539]
428	ENSBTAG00000000899	ENSBTAG00000000899	428.1.1	TMEM17	ENSG00000186889	transmembrane protein 17 [Source:HGNC Symbol;Acc:HGNC:26623]
429	ENSBTAG00000000900	ENSBTAG00000000900	429.1.1	LRRC8C	ENSG00000171488	leucine rich repeat containing 8 VRAC subunit C [Source:HGNC Symbol;Acc:HGNC:25075]
430	ENSBTAG00000000911	ENSBTAG00000000911	430.1.1	UBE2H	ENSG00000186591	ubiquitin conjugating enzyme E2 H [Source:HGNC Symbol;Acc:HGNC:12484]
432	ENSBTAG00000000917	ENSBTAG00000000917	432.1.1	BMP1	ENSG00000168487	bone morphogenetic protein 1 [Source:HGNC Symbol;Acc:HGNC:1067]
433	ENSBTAG00000000918	ENSBTAG00000000918	433.1.1	ERMARD	ENSG00000130023	ER membrane associated RNA degradation [Source:HGNC Symbol;Acc:HGNC:21056]
434	ENSBTAG00000000919	ENSBTAG00000000919	434.1.1	HEY2	ENSG00000135547	hes related family bHLH transcription factor with YRPW motif 2 [Source:HGNC Symbol;Acc:HGNC:4881]
435	ENSBTAG00000000920	ENSBTAG00000000920	435.1.1	DNAH17	ENSG00000187775	dynein axonemal heavy chain 17 [Source:HGNC Symbol;Acc:HGNC:2946]
436	ENSBTAG00000000925	ENSBTAG00000000925	436.1.1	GLT8D2	ENSG00000120820	glycosyltransferase 8 domain containing 2 [Source:HGNC Symbol;Acc:HGNC:24890]
437	ENSBTAG00000000928	ENSBTAG00000000928	437.1.1	SPECC1	ENSG00000128487	sperm antigen with calponin homology and coiled-coil domains 1 [Source:HGNC Symbol;Acc:HGNC:30615]
438	ENSBTAG00000000933	ENSBTAG00000000933	438.1.1	CCDC183	ENSG00000213213	coiled-coil domain containing 183 [Source:HGNC Symbol;Acc:HGNC:28236]
439	ENSBTAG00000000939	ENSBTAG00000000939	439.1.1	KIF16B	ENSG00000089177	kinesin family member 16B [Source:HGNC Symbol;Acc:HGNC:15869]
440	ENSBTAG00000000940	ENSBTAG00000000940	440.1.1	TBCC	ENSG00000124659	tubulin folding cofactor C [Source:HGNC Symbol;Acc:HGNC:11580]
441	ENSBTAG00000000941	ENSBTAG00000000941	441.1.1	PLEKHB2	ENSG00000115762	pleckstrin homology domain containing B2 [Source:HGNC Symbol;Acc:HGNC:19236]
442	ENSBTAG00000000942	ENSBTAG00000000942	442.1.1	SIPA1L2	ENSG00000116991	signal induced proliferation associated 1 like 2 [Source:HGNC Symbol;Acc:HGNC:23800]
443	ENSBTAG00000000943	ENSBTAG00000000943	443.1.1	ZNF286A	ENSG00000187607	zinc finger protein 286A [Source:HGNC Symbol;Acc:HGNC:13501]
444	ENSBTAG00000000944	ENSBTAG00000000944	444.1.1	LPCAT1	ENSG00000153395	lysophosphatidylcholine acyltransferase 1 [Source:HGNC Symbol;Acc:HGNC:25718]
445	ENSBTAG00000000945	ENSBTAG00000000945	445.1.1	ATP2C2	ENSG00000064270	ATPase secretory pathway Ca2+ transporting 2 [Source:HGNC Symbol;Acc:HGNC:29103]
446	ENSBTAG00000000948	ENSBTAG00000000948	446.1.1	RAB2A	ENSG00000104388	RAB2A, member RAS oncogene family [Source:HGNC Symbol;Acc:HGNC:9763]
447	ENSBTAG00000000949	ENSBTAG00000000949	447.1.1	DNAJC9	ENSG00000213551	DnaJ heat shock protein family (Hsp40) member C9 [Source:HGNC Symbol;Acc:HGNC:19123]
448	ENSBTAG00000000950	ENSBTAG00000000950	448.1.1	MRPS16	ENSG00000182180	mitochondrial ribosomal protein S16 [Source:HGNC Symbol;Acc:HGNC:14048]
449	ENSBTAG00000000951	ENSBTAG00000000951	449.1.1	JAKMIP3	ENSG00000188385	Janus kinase and microtubule interacting protein 3 [Source:HGNC Symbol;Acc:HGNC:23523]
450	ENSBTAG00000000957	ENSBTAG00000000957	450.1.1	CDKN2AIP	ENSG00000168564	CDKN2A interacting protein [Source:HGNC Symbol;Acc:HGNC:24325]
451	ENSBTAG00000000959	ENSBTAG00000000959	451.1.1	ZSWIM1	ENSG00000168612	zinc finger SWIM-type containing 1 [Source:HGNC Symbol;Acc:HGNC:16155]
452	ENSBTAG00000000962	ENSBTAG00000000962	452.1.1	STAP1	ENSG00000035720	signal transducing adaptor family member 1 [Source:HGNC Symbol;Acc:HGNC:24133]
453	ENSBTAG00000000964	ENSBTAG00000000964	453.1.1	FCRL5	ENSG00000143297	Fc receptor like 5 [Source:HGNC Symbol;Acc:HGNC:18508]
454	ENSBTAG00000000967	ENSBTAG00000000967	454.1.1	DET1	ENSG00000140543	DET1 partner of COP1 E3 ubiquitin ligase [Source:HGNC Symbol;Acc:HGNC:25477]
455	ENSBTAG00000000973	ENSBTAG00000000973	455.1.1	KCNJ15	ENSG00000157551	potassium inwardly rectifying channel subfamily J member 15 [Source:HGNC Symbol;Acc:HGNC:6261]
456	ENSBTAG00000000977	ENSBTAG00000000977	456.1.1	CADM1	ENSG00000182985	cell adhesion molecule 1 [Source:HGNC Symbol;Acc:HGNC:5951]
457	ENSBTAG00000000978	ENSBTAG00000000978	457.1.1	ASH2L	ENSG00000129691	ASH2 like, histone lysine methyltransferase complex subunit [Source:HGNC Symbol;Acc:HGNC:744]
458	ENSBTAG00000000979	ENSBTAG00000000979	458.1.1	SMIM19	ENSG00000176209	small integral membrane protein 19 [Source:HGNC Symbol;Acc:HGNC:25166]
459	ENSBTAG00000000981	ENSBTAG00000000981	459.1.1	KLHDC8B	ENSG00000185909	kelch domain containing 8B [Source:HGNC Symbol;Acc:HGNC:28557]
460	ENSBTAG00000000983	ENSBTAG00000000983	460.1.1	ABCC8	ENSG00000006071	ATP binding cassette subfamily C member 8 [Source:HGNC Symbol;Acc:HGNC:59]
461	ENSBTAG00000000985	ENSBTAG00000000985	461.1.1	RAB10	ENSG00000084733	RAB10, member RAS oncogene family [Source:HGNC Symbol;Acc:HGNC:9759]
462	ENSBTAG00000000988	ENSBTAG00000000988	462.1.1	BRCA2	ENSG00000139618	BRCA2 DNA repair associated [Source:HGNC Symbol;Acc:HGNC:1101]
463	ENSBTAG00000000990	ENSBTAG00000000990	463.1.1	PSMA2	ENSG00000106588	proteasome 20S subunit alpha 2 [Source:HGNC Symbol;Acc:HGNC:9531]
464	ENSBTAG00000000991	ENSBTAG00000000991	464.1.1	MRPL32	ENSG00000106591	mitochondrial ribosomal protein L32 [Source:HGNC Symbol;Acc:HGNC:14035]
465	ENSBTAG00000000993	ENSBTAG00000000993	465.1.1	N4BP2L1	ENSG00000139597	NEDD4 binding protein 2 like 1 [Source:HGNC Symbol;Acc:HGNC:25037]
466	ENSBTAG00000000998	ENSBTAG00000000998	466.1.1	SLC39A6	ENSG00000141424	solute carrier family 39 member 6 [Source:HGNC Symbol;Acc:HGNC:18607]
467	ENSBTAG00000001002	ENSBTAG00000001002	467.1.1	TCF7	ENSG00000081059	transcription factor 7 [Source:HGNC Symbol;Acc:HGNC:11639]
468	ENSBTAG00000001003	ENSBTAG00000001003	468.1.1	CKMT2	ENSG00000131730	creatine kinase, mitochondrial 2 [Source:HGNC Symbol;Acc:HGNC:1996]
469	ENSBTAG00000001004	ENSBTAG00000001004	469.1.1	ESAM	ENSG00000149564	endothelial cell adhesion molecule [Source:HGNC Symbol;Acc:HGNC:17474]
470	ENSBTAG00000001005	ENSBTAG00000001005	470.1.1	ZNF280B	ENSG00000275004	zinc finger protein 280B [Source:HGNC Symbol;Acc:HGNC:23022]
471	ENSBTAG00000001008	ENSBTAG00000001008	471.1.1	PRF1	ENSG00000180644	perforin 1 [Source:HGNC Symbol;Acc:HGNC:9360]
472	ENSBTAG00000001009	ENSBTAG00000001009	472.1.1	HCLS1	ENSG00000180353	hematopoietic cell-specific Lyn substrate 1 [Source:HGNC Symbol;Acc:HGNC:4844]
473	ENSBTAG00000001010	ENSBTAG00000001010	473.1.1	ADAMTS18	ENSG00000140873	ADAM metallopeptidase with thrombospondin type 1 motif 18 [Source:HGNC Symbol;Acc:HGNC:17110]
474	ENSBTAG00000001013	ENSBTAG00000001013	474.1.1	SLC30A5	ENSG00000145740	solute carrier family 30 member 5 [Source:HGNC Symbol;Acc:HGNC:19089]
475	ENSBTAG00000001014	ENSBTAG00000001014	475.1.1	MAPK7	ENSG00000166484	mitogen-activated protein kinase 7 [Source:HGNC Symbol;Acc:HGNC:6880]
476	ENSBTAG00000001015	ENSBTAG00000001015	476.1.1	TM9SF4	ENSG00000101337	transmembrane 9 superfamily member 4 [Source:HGNC Symbol;Acc:HGNC:30797]
477	ENSBTAG00000001016	ENSBTAG00000001016	477.1.1	NAA35	ENSG00000135040	N-alpha-acetyltransferase 35, NatC auxiliary subunit [Source:HGNC Symbol;Acc:HGNC:24340]
478	ENSBTAG00000001017	ENSBTAG00000001017	478.1.1	SLK	ENSG00000065613	STE20 like kinase [Source:HGNC Symbol;Acc:HGNC:11088]
479	ENSBTAG00000001019	ENSBTAG00000001019	479.1.1	GDF10	ENSG00000266524	growth differentiation factor 10 [Source:HGNC Symbol;Acc:HGNC:4215]
480	ENSBTAG00000001021	ENSBTAG00000001021	480.1.1	CYP1A1	ENSG00000140465	cytochrome P450 family 1 subfamily A member 1 [Source:HGNC Symbol;Acc:HGNC:2595]
481	ENSBTAG00000001022	ENSBTAG00000001022	481.1.1	AMDHD2	ENSG00000162066	amidohydrolase domain containing 2 [Source:HGNC Symbol;Acc:HGNC:24262]
482	ENSBTAG00000001023	ENSBTAG00000001023	482.1.1	ZNF598	ENSG00000167962	zinc finger protein 598, E3 ubiquitin ligase [Source:HGNC Symbol;Acc:HGNC:28079]
483	ENSBTAG00000001024	ENSBTAG00000001024	483.1.1	ARID1A	ENSG00000117713	AT-rich interaction domain 1A [Source:HGNC Symbol;Acc:HGNC:11110]
484	ENSBTAG00000001027	ENSBTAG00000001027	484.1.1	SERPINH1	ENSG00000149257	serpin family H member 1 [Source:HGNC Symbol;Acc:HGNC:1546]
485	ENSBTAG00000001029	ENSBTAG00000001029	485.1.1	RASGRP2	ENSG00000068831	RAS guanyl releasing protein 2 [Source:HGNC Symbol;Acc:HGNC:9879]
486	ENSBTAG00000001030	ENSBTAG00000001030	486.1.1	MTMR3	ENSG00000100330	myotubularin related protein 3 [Source:HGNC Symbol;Acc:HGNC:7451]
487	ENSBTAG00000001032	ENSBTAG00000001032	487.1.1	PYGM	ENSG00000068976	glycogen phosphorylase, muscle associated [Source:HGNC Symbol;Acc:HGNC:9726]
488	ENSBTAG00000001034	ENSBTAG00000001034	488.1.1	IL18R1	ENSG00000115604	interleukin 18 receptor 1 [Source:HGNC Symbol;Acc:HGNC:5988]
489	ENSBTAG00000001035	ENSBTAG00000001035	489.1.1	SF1	ENSG00000168066	splicing factor 1 [Source:HGNC Symbol;Acc:HGNC:12950]
490	ENSBTAG00000001036	ENSBTAG00000001036	490.1.1	HIBADH	ENSG00000106049	3-hydroxyisobutyrate dehydrogenase [Source:HGNC Symbol;Acc:HGNC:4907]
491	ENSBTAG00000001037	ENSBTAG00000001037	491.1.1	MAP4K2	ENSG00000168067	mitogen-activated protein kinase kinase kinase kinase 2 [Source:HGNC Symbol;Acc:HGNC:6864]
492	ENSBTAG00000001038	ENSBTAG00000001038	492.1.1	SNRPB	ENSG00000125835	small nuclear ribonucleoprotein polypeptides B and B1 [Source:HGNC Symbol;Acc:HGNC:11153]
493	ENSBTAG00000001042	ENSBTAG00000001042	493.1.1	MXD1	ENSG00000059728	MAX dimerization protein 1 [Source:HGNC Symbol;Acc:HGNC:6761]
494	ENSBTAG00000001043	ENSBTAG00000001043	494.1.1	LUZP2	ENSG00000187398	leucine zipper protein 2 [Source:HGNC Symbol;Acc:HGNC:23206]
495	ENSBTAG00000001044	ENSBTAG00000001044	495.1.1	SUPV3L1	ENSG00000156502	Suv3 like RNA helicase [Source:HGNC Symbol;Acc:HGNC:11471]
496	ENSBTAG00000001050	ENSBTAG00000001050	496.1.1	LDLRAP1	ENSG00000157978	low density lipoprotein receptor adaptor protein 1 [Source:HGNC Symbol;Acc:HGNC:18640]
497	ENSBTAG00000001052	ENSBTAG00000001052	497.1.1	ADCY10	ENSG00000143199	adenylate cyclase 10 [Source:HGNC Symbol;Acc:HGNC:21285]
498	ENSBTAG00000001055	ENSBTAG00000001055	498.1.1	HNRNPL	ENSG00000104824	heterogeneous nuclear ribonucleoprotein L [Source:HGNC Symbol;Acc:HGNC:5045]
499	ENSBTAG00000001057	ENSBTAG00000001057	499.1.1	ARFGAP3	ENSG00000242247	ADP ribosylation factor GTPase activating protein 3 [Source:HGNC Symbol;Acc:HGNC:661]
500	ENSBTAG00000001060	ENSBTAG00000001060	500.1.1	CXCR4	ENSG00000121966	C-X-C motif chemokine receptor 4 [Source:HGNC Symbol;Acc:HGNC:2561]
501	ENSBTAG00000001061	ENSBTAG00000001061	501.1.1	PRKCA	ENSG00000154229	protein kinase C alpha [Source:HGNC Symbol;Acc:HGNC:9393]
503	ENSBTAG00000001068	ENSBTAG00000001068	503.1.1	ZCWPW1	ENSG00000078487	zinc finger CW-type and PWWP domain containing 1 [Source:HGNC Symbol;Acc:HGNC:23486]
504	ENSBTAG00000001069	ENSBTAG00000001069	504.1.1	TP53	ENSG00000141510	tumor protein p53 [Source:HGNC Symbol;Acc:HGNC:11998]
505	ENSBTAG00000001071	ENSBTAG00000001071	505.1.1	WRAP53	ENSG00000141499	WD repeat containing antisense to TP53 [Source:HGNC Symbol;Acc:HGNC:25522]
506	ENSBTAG00000001074	ENSBTAG00000001074	506.1.1	SAYSD1	ENSG00000112167	SAYSVFN motif domain containing 1 [Source:HGNC Symbol;Acc:HGNC:21025]
507	ENSBTAG00000001077	ENSBTAG00000001077	507.1.1	OSBPL5	ENSG00000021762	oxysterol binding protein like 5 [Source:HGNC Symbol;Acc:HGNC:16392]
508	ENSBTAG00000001078	ENSBTAG00000001078	508.1.1	SRL	ENSG00000185739	sarcalumenin [Source:HGNC Symbol;Acc:HGNC:11295]
509	ENSBTAG00000001081	ENSBTAG00000001081	509.1.1	PALLD	ENSG00000129116	palladin, cytoskeletal associated protein [Source:HGNC Symbol;Acc:HGNC:17068]
510	ENSBTAG00000001083	ENSBTAG00000001083	510.1.1	MAP3K20	ENSG00000091436	mitogen-activated protein kinase kinase kinase 20 [Source:HGNC Symbol;Acc:HGNC:17797]
511	ENSBTAG00000001085	ENSBTAG00000001085	511.1.1	FAM20A	ENSG00000108950	FAM20A golgi associated secretory pathway pseudokinase [Source:HGNC Symbol;Acc:HGNC:23015]
512	ENSBTAG00000001086	ENSBTAG00000001086	512.1.1	FHL2	ENSG00000115641	four and a half LIM domains 2 [Source:HGNC Symbol;Acc:HGNC:3703]
513	ENSBTAG00000001090	ENSBTAG00000001090	513.1.1	CFAP210	ENSG00000154479	cilia and flagella associated protein 210 [Source:HGNC Symbol;Acc:HGNC:25064]
514	ENSBTAG00000001092	ENSBTAG00000001092	514.1.1	PHOSPHO2	ENSG00000144362	phosphatase, orphan 2 [Source:HGNC Symbol;Acc:HGNC:28316]
515	ENSBTAG00000001093	ENSBTAG00000001093	515.1.1	KLHL23	ENSG00000213160	kelch like family member 23 [Source:HGNC Symbol;Acc:HGNC:27506]
516	ENSBTAG00000001094	ENSBTAG00000001094	516.1.1	MTUS2	ENSG00000132938	microtubule associated scaffold protein 2 [Source:HGNC Symbol;Acc:HGNC:20595]
517	ENSBTAG00000001096	ENSBTAG00000001096	517.1.1	PRKRA	ENSG00000180228	protein activator of interferon induced protein kinase EIF2AK2 [Source:HGNC Symbol;Acc:HGNC:9438]
518	ENSBTAG00000001097	ENSBTAG00000001097	518.1.1	FKBP7	ENSG00000079150	FKBP prolyl isomerase 7 [Source:HGNC Symbol;Acc:HGNC:3723]
519	ENSBTAG00000001098	ENSBTAG00000001098	519.1.1	PLEKHA3	ENSG00000116095	pleckstrin homology domain containing A3 [Source:HGNC Symbol;Acc:HGNC:14338]
520	ENSBTAG00000001101	ENSBTAG00000001101	520.1.1	IFNLR1	ENSG00000185436	interferon lambda receptor 1 [Source:HGNC Symbol;Acc:HGNC:18584]
521	ENSBTAG00000001104	ENSBTAG00000001104	521.1.1	CMTM4	ENSG00000183723	CKLF like MARVEL transmembrane domain containing 4 [Source:HGNC Symbol;Acc:HGNC:19175]
522	ENSBTAG00000001105	ENSBTAG00000001105	522.1.1	ANXA4	ENSG00000196975	annexin A4 [Source:HGNC Symbol;Acc:HGNC:542]
523	ENSBTAG00000001107	ENSBTAG00000001107	523.1.1	CACYBP	ENSG00000116161	calcyclin binding protein [Source:HGNC Symbol;Acc:HGNC:30423]
524	ENSBTAG00000001108	ENSBTAG00000001108	524.1.1	GMCL1	ENSG00000087338	germ cell-less 1, spermatogenesis associated [Source:HGNC Symbol;Acc:HGNC:23843]
524	ENSBTAG00000001108	ENSBTAG00000001108	524.1.2	GMCL2	ENSG00000244234	germ cell-less 2, spermatogenesis associated [Source:HGNC Symbol;Acc:HGNC:19717]
525	ENSBTAG00000001109	ENSBTAG00000001109	525.1.1	MRPS14	ENSG00000120333	mitochondrial ribosomal protein S14 [Source:HGNC Symbol;Acc:HGNC:14049]
526	ENSBTAG00000001110	ENSBTAG00000001110	526.1.1	SLC16A5	ENSG00000170190	solute carrier family 16 member 5 [Source:HGNC Symbol;Acc:HGNC:10926]
527	ENSBTAG00000001112	ENSBTAG00000001112	527.1.1	SMOX	ENSG00000088826	spermine oxidase [Source:HGNC Symbol;Acc:HGNC:15862]
528	ENSBTAG00000001113	ENSBTAG00000001113	528.1.1	NDUFAF7	ENSG00000003509	NADH:ubiquinone oxidoreductase complex assembly factor 7 [Source:HGNC Symbol;Acc:HGNC:28816]
529	ENSBTAG00000001114	ENSBTAG00000001114	529.1.1	PRKD3	ENSG00000115825	protein kinase D3 [Source:HGNC Symbol;Acc:HGNC:9408]
530	ENSBTAG00000001116	ENSBTAG00000001116	530.1.1	P4HA2	ENSG00000072682	prolyl 4-hydroxylase subunit alpha 2 [Source:HGNC Symbol;Acc:HGNC:8547]
531	ENSBTAG00000001117	ENSBTAG00000001117	531.1.1	ANKRD50	ENSG00000151458	ankyrin repeat domain containing 50 [Source:HGNC Symbol;Acc:HGNC:29223]
532	ENSBTAG00000001119	ENSBTAG00000001119	532.1.1	ANKRD13B	ENSG00000198720	ankyrin repeat domain 13B [Source:HGNC Symbol;Acc:HGNC:26363]
533	ENSBTAG00000001120	ENSBTAG00000001120	533.1.1	CORO6	ENSG00000167549	coronin 6 [Source:HGNC Symbol;Acc:HGNC:21356]
534	ENSBTAG00000001123	ENSBTAG00000001123	534.1.1	SNRNP48	ENSG00000168566	small nuclear ribonucleoprotein U11/U12 subunit 48 [Source:HGNC Symbol;Acc:HGNC:21368]
535	ENSBTAG00000001124	ENSBTAG00000001124	535.1.1	GALC	ENSG00000054983	galactosylceramidase [Source:HGNC Symbol;Acc:HGNC:4115]
537	ENSBTAG00000001126	ENSBTAG00000001126	537.1.1	BMP2K	ENSG00000138756	BMP2 inducible kinase [Source:HGNC Symbol;Acc:HGNC:18041]
538	ENSBTAG00000001131	ENSBTAG00000001131	538.1.1	SLC12A9	ENSG00000146828	solute carrier family 12 member 9 [Source:HGNC Symbol;Acc:HGNC:17435]
539	ENSBTAG00000001132	ENSBTAG00000001132	539.1.1	GTDC1	ENSG00000121964	glycosyltransferase like domain containing 1 [Source:HGNC Symbol;Acc:HGNC:20887]
540	ENSBTAG00000001133	ENSBTAG00000001133	540.1.1	VWA8	ENSG00000102763	von Willebrand factor A domain containing 8 [Source:HGNC Symbol;Acc:HGNC:29071]
541	ENSBTAG00000001134	ENSBTAG00000001134	541.1.1	SRRT	ENSG00000087087	serrate, RNA effector molecule [Source:HGNC Symbol;Acc:HGNC:24101]
542	ENSBTAG00000001137	ENSBTAG00000001137	542.1.1	CLTA	ENSG00000122705	clathrin light chain A [Source:HGNC Symbol;Acc:HGNC:2090]
543	ENSBTAG00000001140	ENSBTAG00000001140	543.1.1	IAH1	ENSG00000134330	isoamyl acetate hydrolyzing esterase 1 (putative) [Source:HGNC Symbol;Acc:HGNC:27696]
544	ENSBTAG00000001141	ENSBTAG00000001141	544.1.1	ADAM17	ENSG00000151694	ADAM metallopeptidase domain 17 [Source:HGNC Symbol;Acc:HGNC:195]
545	ENSBTAG00000001142	ENSBTAG00000001142	545.1.1	GNE	ENSG00000159921	glucosamine (UDP-N-acetyl)-2-epimerase/N-acetylmannosamine kinase [Source:HGNC Symbol;Acc:HGNC:23657]
546	ENSBTAG00000001144	ENSBTAG00000001144	546.1.1	NAA20	ENSG00000173418	N-alpha-acetyltransferase 20, NatB catalytic subunit [Source:HGNC Symbol;Acc:HGNC:15908]
547	ENSBTAG00000001146	ENSBTAG00000001146	547.1.1	HIVEP2	ENSG00000010818	HIVEP zinc finger 2 [Source:HGNC Symbol;Acc:HGNC:4921]
548	ENSBTAG00000001151	ENSBTAG00000001151	548.1.1	APLP1	ENSG00000105290	amyloid beta precursor like protein 1 [Source:HGNC Symbol;Acc:HGNC:597]
549	ENSBTAG00000001153	ENSBTAG00000001153	549.1.1	TLE2	ENSG00000065717	TLE family member 2, transcriptional corepressor [Source:HGNC Symbol;Acc:HGNC:11838]
550	ENSBTAG00000001156	ENSBTAG00000001156	550.1.1	ST3GAL1	ENSG00000008513	ST3 beta-galactoside alpha-2,3-sialyltransferase 1 [Source:HGNC Symbol;Acc:HGNC:10862]
551	ENSBTAG00000001160	ENSBTAG00000001160	551.1.1	GMEB1	ENSG00000162419	glucocorticoid modulatory element binding protein 1 [Source:HGNC Symbol;Acc:HGNC:4370]
552	ENSBTAG00000001161	ENSBTAG00000001161	552.1.1	SINHCAF	ENSG00000139146	SIN3-HDAC complex associated factor [Source:HGNC Symbol;Acc:HGNC:30702]
553	ENSBTAG00000001164	ENSBTAG00000001164	553.1.1	ACAD10	ENSG00000111271	acyl-CoA dehydrogenase family member 10 [Source:HGNC Symbol;Acc:HGNC:21597]
554	ENSBTAG00000001165	ENSBTAG00000001165	554.1.1	AIFM2	ENSG00000042286	apoptosis inducing factor mitochondria associated 2 [Source:HGNC Symbol;Acc:HGNC:21411]
555	ENSBTAG00000001166	ENSBTAG00000001166	555.1.1	HSF5	ENSG00000176160	heat shock transcription factor 5 [Source:HGNC Symbol;Acc:HGNC:26862]
556	ENSBTAG00000001168	ENSBTAG00000001168	556.1.1	BRAP	ENSG00000089234	BRCA1 associated protein [Source:HGNC Symbol;Acc:HGNC:1099]
558	ENSBTAG00000001173	ENSBTAG00000001173	558.1.1	PLXNA2	ENSG00000076356	plexin A2 [Source:HGNC Symbol;Acc:HGNC:9100]
559	ENSBTAG00000001174	ENSBTAG00000001174	559.1.1	MRPL15	ENSG00000137547	mitochondrial ribosomal protein L15 [Source:HGNC Symbol;Acc:HGNC:14054]
560	ENSBTAG00000001178	ENSBTAG00000001178	560.1.1	USPL1	ENSG00000132952	ubiquitin specific peptidase like 1 [Source:HGNC Symbol;Acc:HGNC:20294]
561	ENSBTAG00000001179	ENSBTAG00000001179	561.1.1	TEP1	ENSG00000129566	telomerase associated protein 1 [Source:HGNC Symbol;Acc:HGNC:11726]
562	ENSBTAG00000001181	ENSBTAG00000001181	562.1.1	RPS6KC1	ENSG00000136643	ribosomal protein S6 kinase C1 [Source:HGNC Symbol;Acc:HGNC:10439]
563	ENSBTAG00000001183	ENSBTAG00000001183	563.1.1	KLHL33	ENSG00000185271	kelch like family member 33 [Source:HGNC Symbol;Acc:HGNC:31952]
564	ENSBTAG00000001185	ENSBTAG00000001185	564.1.1	KMT5B	ENSG00000110066	lysine methyltransferase 5B [Source:HGNC Symbol;Acc:HGNC:24283]
565	ENSBTAG00000001186	ENSBTAG00000001186	565.1.1	SH2D4A	ENSG00000104611	SH2 domain containing 4A [Source:HGNC Symbol;Acc:HGNC:26102]
566	ENSBTAG00000001188	ENSBTAG00000001188	566.1.1	ROM1	ENSG00000149489	retinal outer segment membrane protein 1 [Source:HGNC Symbol;Acc:HGNC:10254]
567	ENSBTAG00000001189	ENSBTAG00000001189	567.1.1	AP1B1	ENSG00000100280	adaptor related protein complex 1 subunit beta 1 [Source:HGNC Symbol;Acc:HGNC:554]
568	ENSBTAG00000001192	ENSBTAG00000001192	568.1.1	STX12	ENSG00000117758	syntaxin 12 [Source:HGNC Symbol;Acc:HGNC:11430]
569	ENSBTAG00000001193	ENSBTAG00000001193	569.1.1	UNC93B1	ENSG00000110057	unc-93 homolog B1, TLR signaling regulator [Source:HGNC Symbol;Acc:HGNC:13481]
570	ENSBTAG00000001197	ENSBTAG00000001197	570.1.1	SLAMF7	ENSG00000026751	SLAM family member 7 [Source:HGNC Symbol;Acc:HGNC:21394]
571	ENSBTAG00000001199	ENSBTAG00000001199	571.1.1	DAP3	ENSG00000132676	death associated protein 3 [Source:HGNC Symbol;Acc:HGNC:2673]
572	ENSBTAG00000001204	ENSBTAG00000001204	572.1.1	JCAD	ENSG00000165757	junctional cadherin 5 associated [Source:HGNC Symbol;Acc:HGNC:29283]
573	ENSBTAG00000001207	ENSBTAG00000001207	573.1.1	SERPINB8	ENSG00000166401	serpin family B member 8 [Source:HGNC Symbol;Acc:HGNC:8952]
574	ENSBTAG00000001209	ENSBTAG00000001209	574.1.1	PHLDB2	ENSG00000144824	pleckstrin homology like domain family B member 2 [Source:HGNC Symbol;Acc:HGNC:29573]
575	ENSBTAG00000001212	ENSBTAG00000001212	575.1.1	SSR2	ENSG00000163479	signal sequence receptor subunit 2 [Source:HGNC Symbol;Acc:HGNC:11324]
576	ENSBTAG00000001223	ENSBTAG00000001223	576.1.1	CAAP1	ENSG00000120159	caspase activity and apoptosis inhibitor 1 [Source:HGNC Symbol;Acc:HGNC:25834]
577	ENSBTAG00000001224	ENSBTAG00000001224	577.1.1	ATP9B	ENSG00000166377	ATPase phospholipid transporting 9B (putative) [Source:HGNC Symbol;Acc:HGNC:13541]
578	ENSBTAG00000001225	ENSBTAG00000001225	578.1.1	RBM14	ENSG00000239306	RNA binding motif protein 14 [Source:HGNC Symbol;Acc:HGNC:14219]
579	ENSBTAG00000001229	ENSBTAG00000001229	579.1.1	SLC25A22	ENSG00000177542	solute carrier family 25 member 22 [Source:HGNC Symbol;Acc:HGNC:19954]
580	ENSBTAG00000001233	ENSBTAG00000001233	580.1.1	MPZL3	ENSG00000160588	myelin protein zero like 3 [Source:HGNC Symbol;Acc:HGNC:27279]
581	ENSBTAG00000001235	ENSBTAG00000001235	581.1.1	CD200R1	ENSG00000163606	CD200 receptor 1 [Source:HGNC Symbol;Acc:HGNC:24235]
581	ENSBTAG00000001235	ENSBTAG00000001235	581.1.2	CD200R1L	ENSG00000206531	CD200 receptor 1 like [Source:HGNC Symbol;Acc:HGNC:24665]
582	ENSBTAG00000001243	ENSBTAG00000001243	582.1.1	AP3M2	ENSG00000070718	adaptor related protein complex 3 subunit mu 2 [Source:HGNC Symbol;Acc:HGNC:570]
583	ENSBTAG00000001244	ENSBTAG00000001244	583.1.1	PLAT	ENSG00000104368	plasminogen activator, tissue type [Source:HGNC Symbol;Acc:HGNC:9051]
584	ENSBTAG00000001246	ENSBTAG00000001246	584.1.1	ATP1A1	ENSG00000163399	ATPase Na+/K+ transporting subunit alpha 1 [Source:HGNC Symbol;Acc:HGNC:799]
585	ENSBTAG00000001249	ENSBTAG00000001249	585.1.1	SULT1B1	ENSG00000173597	sulfotransferase family 1B member 1 [Source:HGNC Symbol;Acc:HGNC:17845]
586	ENSBTAG00000001250	ENSBTAG00000001250	586.1.1	TFAP2A	ENSG00000137203	transcription factor AP-2 alpha [Source:HGNC Symbol;Acc:HGNC:11742]
587	ENSBTAG00000001252	ENSBTAG00000001252	587.1.1	HIVEP1	ENSG00000095951	HIVEP zinc finger 1 [Source:HGNC Symbol;Acc:HGNC:4920]
588	ENSBTAG00000001254	ENSBTAG00000001254	588.1.1	ANKRD46	ENSG00000186106	ankyrin repeat domain 46 [Source:HGNC Symbol;Acc:HGNC:27229]
589	ENSBTAG00000001257	ENSBTAG00000001257	589.1.1	AGTPBP1	ENSG00000135049	ATP/GTP binding carboxypeptidase 1 [Source:HGNC Symbol;Acc:HGNC:17258]
590	ENSBTAG00000001258	ENSBTAG00000001258	590.1.1	TMEM50B	ENSG00000142188	transmembrane protein 50B [Source:HGNC Symbol;Acc:HGNC:1280]
591	ENSBTAG00000001265	ENSBTAG00000001265	591.1.1	HRG	ENSG00000113905	histidine rich glycoprotein [Source:HGNC Symbol;Acc:HGNC:5181]
592	ENSBTAG00000001269	ENSBTAG00000001269	592.1.1	TMEM165	ENSG00000134851	transmembrane protein 165 [Source:HGNC Symbol;Acc:HGNC:30760]
593	ENSBTAG00000001273	ENSBTAG00000001273	593.1.1	NLRP3	ENSG00000162711	NLR family pyrin domain containing 3 [Source:HGNC Symbol;Acc:HGNC:16400]
594	ENSBTAG00000001274	ENSBTAG00000001274	594.1.1	PPM1L	ENSG00000163590	protein phosphatase, Mg2+/Mn2+ dependent 1L [Source:HGNC Symbol;Acc:HGNC:16381]
595	ENSBTAG00000001279	ENSBTAG00000001279	595.1.1	MPP2	ENSG00000108852	MAGUK p55 scaffold protein 2 [Source:HGNC Symbol;Acc:HGNC:7220]
596	ENSBTAG00000001280	ENSBTAG00000001280	596.1.1	CLPB	ENSG00000162129	ClpB family mitochondrial disaggregase [Source:HGNC Symbol;Acc:HGNC:30664]
597	ENSBTAG00000001282	ENSBTAG00000001282	597.1.1	RALGAPA1	ENSG00000174373	Ral GTPase activating protein catalytic subunit alpha 1 [Source:HGNC Symbol;Acc:HGNC:17770]
598	ENSBTAG00000001283	ENSBTAG00000001283	598.1.1	RIC1	ENSG00000107036	RIC1 homolog, RAB6A GEF complex partner 1 [Source:HGNC Symbol;Acc:HGNC:17686]
599	ENSBTAG00000001286	ENSBTAG00000001286	599.1.1	ELMO3	ENSG00000102890	engulfment and cell motility 3 [Source:HGNC Symbol;Acc:HGNC:17289]
600	ENSBTAG00000001289	ENSBTAG00000001289	600.1.1	MRPL18	ENSG00000112110	mitochondrial ribosomal protein L18 [Source:HGNC Symbol;Acc:HGNC:14477]
601	ENSBTAG00000001290	ENSBTAG00000001290	601.1.1	TUBD1	ENSG00000108423	tubulin delta 1 [Source:HGNC Symbol;Acc:HGNC:16811]
602	ENSBTAG00000001292	ENSBTAG00000001292	602.1.1	LTF	ENSG00000012223	lactotransferrin [Source:HGNC Symbol;Acc:HGNC:6720]
603	ENSBTAG00000001294	ENSBTAG00000001294	603.1.1	PPP1R15A	ENSG00000087074	protein phosphatase 1 regulatory subunit 15A [Source:HGNC Symbol;Acc:HGNC:14375]
604	ENSBTAG00000001295	ENSBTAG00000001295	604.1.1	DEPDC5	ENSG00000100150	DEP domain containing 5, GATOR1 subcomplex subunit [Source:HGNC Symbol;Acc:HGNC:18423]
605	ENSBTAG00000001296	ENSBTAG00000001296	605.1.1	TMEM50A	ENSG00000183726	transmembrane protein 50A [Source:HGNC Symbol;Acc:HGNC:30590]
606	ENSBTAG00000001298	ENSBTAG00000001298	606.1.1	STAMBPL1	ENSG00000138134	STAM binding protein like 1 [Source:HGNC Symbol;Acc:HGNC:24105]
607	ENSBTAG00000001299	ENSBTAG00000001299	607.1.1	CYP7B1	ENSG00000172817	cytochrome P450 family 7 subfamily B member 1 [Source:HGNC Symbol;Acc:HGNC:2652]
608	ENSBTAG00000001301	ENSBTAG00000001301	608.1.1	LRRC32	ENSG00000137507	leucine rich repeat containing 32 [Source:HGNC Symbol;Acc:HGNC:4161]
609	ENSBTAG00000001302	ENSBTAG00000001302	609.1.1	MRPS28	ENSG00000147586	mitochondrial ribosomal protein S28 [Source:HGNC Symbol;Acc:HGNC:14513]
610	ENSBTAG00000001303	ENSBTAG00000001303	610.1.1	HSPB8	ENSG00000152137	heat shock protein family B (small) member 8 [Source:HGNC Symbol;Acc:HGNC:30171]
611	ENSBTAG00000001305	ENSBTAG00000001305	611.1.1	ATP2B2	ENSG00000157087	ATPase plasma membrane Ca2+ transporting 2 [Source:HGNC Symbol;Acc:HGNC:815]
612	ENSBTAG00000001306	ENSBTAG00000001306	612.1.1	FXN	ENSG00000165060	frataxin [Source:HGNC Symbol;Acc:HGNC:3951]
613	ENSBTAG00000001314	ENSBTAG00000001314	613.1.1	TRMT6	ENSG00000089195	tRNA methyltransferase 6 non-catalytic subunit [Source:HGNC Symbol;Acc:HGNC:20900]
614	ENSBTAG00000001315	ENSBTAG00000001315	614.1.1	DMRTA1	ENSG00000176399	DMRT like family A1 [Source:HGNC Symbol;Acc:HGNC:13826]
615	ENSBTAG00000001320	ENSBTAG00000001320	615.1.1	VPS16	ENSG00000215305	VPS16 core subunit of CORVET and HOPS complexes [Source:HGNC Symbol;Acc:HGNC:14584]
616	ENSBTAG00000001321	ENSBTAG00000001321	616.1.1	IL1B	ENSG00000125538	interleukin 1 beta [Source:HGNC Symbol;Acc:HGNC:5992]
617	ENSBTAG00000001323	ENSBTAG00000001323	617.1.1	CENPC	ENSG00000145241	centromere protein C [Source:HGNC Symbol;Acc:HGNC:1854]
618	ENSBTAG00000001324	ENSBTAG00000001324	618.1.1	SLCO2A1	ENSG00000174640	solute carrier organic anion transporter family member 2A1 [Source:HGNC Symbol;Acc:HGNC:10955]
619	ENSBTAG00000001325	ENSBTAG00000001325	619.1.1	UPB1	ENSG00000100024	beta-ureidopropionase 1 [Source:HGNC Symbol;Acc:HGNC:16297]
620	ENSBTAG00000001328	ENSBTAG00000001328	620.1.1	SLBP	ENSG00000163950	stem-loop histone mRNA binding protein [Source:HGNC Symbol;Acc:HGNC:10904]
621	ENSBTAG00000001329	ENSBTAG00000001329	621.1.1	CLPTM1L	ENSG00000049656	CLPTM1 like [Source:HGNC Symbol;Acc:HGNC:24308]
622	ENSBTAG00000001332	ENSBTAG00000001332	622.1.1	MYO1C	ENSG00000197879	myosin IC [Source:HGNC Symbol;Acc:HGNC:7597]
624	ENSBTAG00000001335	ENSBTAG00000001335	624.1.1	GHR	ENSG00000112964	growth hormone receptor [Source:HGNC Symbol;Acc:HGNC:4263]
625	ENSBTAG00000001338	ENSBTAG00000001338	625.1.1	CCR3	ENSG00000183625	C-C motif chemokine receptor 3 [Source:HGNC Symbol;Acc:HGNC:1604]
626	ENSBTAG00000001342	ENSBTAG00000001342	626.1.1	RSL24D1	ENSG00000137876	ribosomal L24 domain containing 1 [Source:HGNC Symbol;Acc:HGNC:18479]
627	ENSBTAG00000001348	ENSBTAG00000001348	627.1.1	COMMD8	ENSG00000169019	COMM domain containing 8 [Source:HGNC Symbol;Acc:HGNC:26036]
628	ENSBTAG00000001349	ENSBTAG00000001349	628.1.1	KIF1C	ENSG00000129250	kinesin family member 1C [Source:HGNC Symbol;Acc:HGNC:6317]
629	ENSBTAG00000001352	ENSBTAG00000001352	629.1.1	ENTR1	ENSG00000165689	endosome associated trafficking regulator 1 [Source:HGNC Symbol;Acc:HGNC:10667]
630	ENSBTAG00000001353	ENSBTAG00000001353	630.1.1	PMPCA	ENSG00000165688	peptidase, mitochondrial processing subunit alpha [Source:HGNC Symbol;Acc:HGNC:18667]
631	ENSBTAG00000001354	ENSBTAG00000001354	631.1.1	INPP5E	ENSG00000148384	inositol polyphosphate-5-phosphatase E [Source:HGNC Symbol;Acc:HGNC:21474]
632	ENSBTAG00000001356	ENSBTAG00000001356	632.1.1	USP38	ENSG00000170185	ubiquitin specific peptidase 38 [Source:HGNC Symbol;Acc:HGNC:20067]
633	ENSBTAG00000001360	ENSBTAG00000001360	633.1.1	RPS12	ENSG00000112306	ribosomal protein S12 [Source:HGNC Symbol;Acc:HGNC:10385]
634	ENSBTAG00000001364	ENSBTAG00000001364	634.1.1	DPH6	ENSG00000134146	diphthamine biosynthesis 6 [Source:HGNC Symbol;Acc:HGNC:30543]
635	ENSBTAG00000001368	ENSBTAG00000001368	635.1.1	LGALS3BP	ENSG00000108679	galectin 3 binding protein [Source:HGNC Symbol;Acc:HGNC:6564]
636	ENSBTAG00000001374	ENSBTAG00000001374	636.1.1	METTL27	ENSG00000165171	methyltransferase like 27 [Source:HGNC Symbol;Acc:HGNC:19068]
637	ENSBTAG00000001385	ENSBTAG00000001385	637.1.1	ZSCAN2	ENSG00000176371	zinc finger and SCAN domain containing 2 [Source:HGNC Symbol;Acc:HGNC:20994]
638	ENSBTAG00000001387	ENSBTAG00000001387	638.1.1	WDR73	ENSG00000177082	WD repeat domain 73 [Source:HGNC Symbol;Acc:HGNC:25928]
639	ENSBTAG00000001390	ENSBTAG00000001390	639.1.1	B4GALT4	ENSG00000121578	beta-1,4-galactosyltransferase 4 [Source:HGNC Symbol;Acc:HGNC:927]
640	ENSBTAG00000001391	ENSBTAG00000001391	640.1.1	ANKRD42	ENSG00000137494	ankyrin repeat domain 42 [Source:HGNC Symbol;Acc:HGNC:26752]
641	ENSBTAG00000001392	ENSBTAG00000001392	641.1.1	RDH16	ENSG00000139547	retinol dehydrogenase 16 [Source:HGNC Symbol;Acc:HGNC:29674]
642	ENSBTAG00000001393	ENSBTAG00000001393	642.1.1	MTF2	ENSG00000143033	metal response element binding transcription factor 2 [Source:HGNC Symbol;Acc:HGNC:29535]
643	ENSBTAG00000001394	ENSBTAG00000001394	643.1.1	TMED9	ENSG00000184840	transmembrane p24 trafficking protein 9 [Source:HGNC Symbol;Acc:HGNC:24878]
644	ENSBTAG00000001395	ENSBTAG00000001395	644.1.1	C21orf91	ENSG00000154642	chromosome 21 open reading frame 91 [Source:HGNC Symbol;Acc:HGNC:16459]
645	ENSBTAG00000001396	ENSBTAG00000001396	645.1.1	ADAMTS7	ENSG00000136378	ADAM metallopeptidase with thrombospondin type 1 motif 7 [Source:HGNC Symbol;Acc:HGNC:223]
646	ENSBTAG00000001398	ENSBTAG00000001398	646.1.1	ATP2A2	ENSG00000174437	ATPase sarcoplasmic/endoplasmic reticulum Ca2+ transporting 2 [Source:HGNC Symbol;Acc:HGNC:812]
647	ENSBTAG00000001400	ENSBTAG00000001400	647.1.1	AKT2	ENSG00000105221	AKT serine/threonine kinase 2 [Source:HGNC Symbol;Acc:HGNC:392]
648	ENSBTAG00000001403	ENSBTAG00000001403	648.1.1	PRKCI	ENSG00000163558	protein kinase C iota [Source:HGNC Symbol;Acc:HGNC:9404]
649	ENSBTAG00000001405	ENSBTAG00000001405	649.1.1	GLCE	ENSG00000138604	glucuronic acid epimerase [Source:HGNC Symbol;Acc:HGNC:17855]
650	ENSBTAG00000001407	ENSBTAG00000001407	650.1.1	AP3S2	ENSG00000157823	adaptor related protein complex 3 subunit sigma 2 [Source:HGNC Symbol;Acc:HGNC:571]
651	ENSBTAG00000001408	ENSBTAG00000001408	651.1.1	CNRIP1	ENSG00000119865	cannabinoid receptor interacting protein 1 [Source:HGNC Symbol;Acc:HGNC:24546]
652	ENSBTAG00000001410	ENSBTAG00000001410	652.1.1	GRAMD1B	ENSG00000023171	GRAM domain containing 1B [Source:HGNC Symbol;Acc:HGNC:29214]
653	ENSBTAG00000001412	ENSBTAG00000001412	653.1.1	N6AMT1	ENSG00000156239	N-6 adenine-specific DNA methyltransferase 1 [Source:HGNC Symbol;Acc:HGNC:16021]
654	ENSBTAG00000001414	ENSBTAG00000001414	654.1.1	KCTD12	ENSG00000178695	potassium channel tetramerization domain containing 12 [Source:HGNC Symbol;Acc:HGNC:14678]
655	ENSBTAG00000001415	ENSBTAG00000001415	655.1.1	THOC6	ENSG00000131652	THO complex subunit 6 [Source:HGNC Symbol;Acc:HGNC:28369]
656	ENSBTAG00000001417	ENSBTAG00000001417	656.1.1	ACSM1	ENSG00000166743	acyl-CoA synthetase medium chain family member 1 [Source:HGNC Symbol;Acc:HGNC:18049]
657	ENSBTAG00000001419	ENSBTAG00000001419	657.1.1	MRPL4	ENSG00000105364	mitochondrial ribosomal protein L4 [Source:HGNC Symbol;Acc:HGNC:14276]
658	ENSBTAG00000001420	ENSBTAG00000001420	658.1.1	ABHD12	ENSG00000100997	abhydrolase domain containing 12, lysophospholipase [Source:HGNC Symbol;Acc:HGNC:15868]
659	ENSBTAG00000001424	ENSBTAG00000001424	659.1.1	MSH6	ENSG00000116062	mutS homolog 6 [Source:HGNC Symbol;Acc:HGNC:7329]
660	ENSBTAG00000001425	ENSBTAG00000001425	660.1.1	FBXO11	ENSG00000138081	F-box protein 11 [Source:HGNC Symbol;Acc:HGNC:13590]
661	ENSBTAG00000001429	ENSBTAG00000001429	661.1.1	NEURL1B	ENSG00000214357	neuralized E3 ubiquitin protein ligase 1B [Source:HGNC Symbol;Acc:HGNC:35422]
662	ENSBTAG00000001435	ENSBTAG00000001435	662.1.1	ARL6IP6	ENSG00000177917	ADP ribosylation factor like GTPase 6 interacting protein 6 [Source:HGNC Symbol;Acc:HGNC:24048]
663	ENSBTAG00000001439	ENSBTAG00000001439	663.1.1	HESX1	ENSG00000163666	HESX homeobox 1 [Source:HGNC Symbol;Acc:HGNC:4877]
664	ENSBTAG00000001440	ENSBTAG00000001440	664.1.1	PMM2	ENSG00000140650	phosphomannomutase 2 [Source:HGNC Symbol;Acc:HGNC:9115]
665	ENSBTAG00000001444	ENSBTAG00000001444	665.1.1	TNXB	ENSG00000168477	tenascin XB [Source:HGNC Symbol;Acc:HGNC:11976]
666	ENSBTAG00000001446	ENSBTAG00000001446	666.1.1	ABRACL	ENSG00000146386	ABRA C-terminal like [Source:HGNC Symbol;Acc:HGNC:21230]
667	ENSBTAG00000001449	ENSBTAG00000001449	667.1.1	SRA1	ENSG00000213523	steroid receptor RNA activator 1 [Source:HGNC Symbol;Acc:HGNC:11281]
668	ENSBTAG00000001450	ENSBTAG00000001450	668.1.1	APBB3	ENSG00000113108	amyloid beta precursor protein binding family B member 3 [Source:HGNC Symbol;Acc:HGNC:20708]
669	ENSBTAG00000001455	ENSBTAG00000001455	669.1.1	HOXA7	ENSG00000122592	homeobox A7 [Source:HGNC Symbol;Acc:HGNC:5108]
670	ENSBTAG00000001457	ENSBTAG00000001457	670.1.1	TMEM267	ENSG00000151881	transmembrane protein 267 [Source:HGNC Symbol;Acc:HGNC:26139]
671	ENSBTAG00000001460	ENSBTAG00000001460	671.1.1	LIN7C	ENSG00000148943	lin-7 homolog C, crumbs cell polarity complex component [Source:HGNC Symbol;Acc:HGNC:17789]
672	ENSBTAG00000001462	ENSBTAG00000001462	672.1.1	FLT4	ENSG00000037280	fms related receptor tyrosine kinase 4 [Source:HGNC Symbol;Acc:HGNC:3767]
673	ENSBTAG00000001463	ENSBTAG00000001463	673.1.1	TNKS	ENSG00000173273	tankyrase [Source:HGNC Symbol;Acc:HGNC:11941]
674	ENSBTAG00000001464	ENSBTAG00000001464	674.1.1	GPR156	ENSG00000175697	G protein-coupled receptor 156 [Source:HGNC Symbol;Acc:HGNC:20844]
675	ENSBTAG00000001465	ENSBTAG00000001465	675.1.1	P2RY1	ENSG00000169860	purinergic receptor P2Y1 [Source:HGNC Symbol;Acc:HGNC:8539]
676	ENSBTAG00000001468	ENSBTAG00000001468	676.1.1	SAMD4A	ENSG00000020577	sterile alpha motif domain containing 4A [Source:HGNC Symbol;Acc:HGNC:23023]
677	ENSBTAG00000001470	ENSBTAG00000001470	677.1.1	DTX2	ENSG00000091073	deltex E3 ubiquitin ligase 2 [Source:HGNC Symbol;Acc:HGNC:15973]
678	ENSBTAG00000001471	ENSBTAG00000001471	678.1.1	POC1A	ENSG00000164087	POC1 centriolar protein A [Source:HGNC Symbol;Acc:HGNC:24488]
679	ENSBTAG00000001473	ENSBTAG00000001473	679.1.1	ARVCF	ENSG00000099889	ARVCF delta catenin family member [Source:HGNC Symbol;Acc:HGNC:728]
680	ENSBTAG00000001474	ENSBTAG00000001474	680.1.1	NRGN	ENSG00000154146	neurogranin [Source:HGNC Symbol;Acc:HGNC:8000]
681	ENSBTAG00000001475	ENSBTAG00000001475	681.1.1	MCUR1	ENSG00000050393	mitochondrial calcium uniporter regulator 1 [Source:HGNC Symbol;Acc:HGNC:21097]
682	ENSBTAG00000001478	ENSBTAG00000001478	682.1.1	DESI2	ENSG00000121644	desumoylating isopeptidase 2 [Source:HGNC Symbol;Acc:HGNC:24264]
683	ENSBTAG00000001481	ENSBTAG00000001481	683.1.1	IGSF9	ENSG00000085552	immunoglobulin superfamily member 9 [Source:HGNC Symbol;Acc:HGNC:18132]
684	ENSBTAG00000001483	ENSBTAG00000001483	684.1.1	SRGAP2C	ENSG00000171943	SLIT-ROBO Rho GTPase activating protein 2C [Source:HGNC Symbol;Acc:HGNC:30584]
684	ENSBTAG00000001483	ENSBTAG00000001483	684.1.2	SRGAP2B	ENSG00000196369	SLIT-ROBO Rho GTPase activating protein 2B [Source:HGNC Symbol;Acc:HGNC:35237]
684	ENSBTAG00000001483	ENSBTAG00000001483	684.1.3	SRGAP2	ENSG00000266028	SLIT-ROBO Rho GTPase activating protein 2 [Source:HGNC Symbol;Acc:HGNC:19751]
685	ENSBTAG00000001484	ENSBTAG00000001484	685.1.1	LZTFL1	ENSG00000163818	leucine zipper transcription factor like 1 [Source:HGNC Symbol;Acc:HGNC:6741]
686	ENSBTAG00000001485	ENSBTAG00000001485	686.1.1	PPIP5K2	ENSG00000145725	diphosphoinositol pentakisphosphate kinase 2 [Source:HGNC Symbol;Acc:HGNC:29035]
687	ENSBTAG00000001489	ENSBTAG00000001489	687.1.1	TUBA1A	ENSG00000167552	tubulin alpha 1a [Source:HGNC Symbol;Acc:HGNC:20766]
688	ENSBTAG00000001491	ENSBTAG00000001491	688.1.1	NWD2	ENSG00000174145	NACHT and WD repeat domain containing 2 [Source:HGNC Symbol;Acc:HGNC:29229]
689	ENSBTAG00000001492	ENSBTAG00000001492	689.1.1	FYB1	ENSG00000082074	FYN binding protein 1 [Source:HGNC Symbol;Acc:HGNC:4036]
690	ENSBTAG00000001497	ENSBTAG00000001497	690.1.1	MRAS	ENSG00000158186	muscle RAS oncogene homolog [Source:HGNC Symbol;Acc:HGNC:7227]
691	ENSBTAG00000001498	ENSBTAG00000001498	691.1.1	CYTH2	ENSG00000105443	cytohesin 2 [Source:HGNC Symbol;Acc:HGNC:9502]
692	ENSBTAG00000001499	ENSBTAG00000001499	692.1.1	TRIM33	ENSG00000197323	tripartite motif containing 33 [Source:HGNC Symbol;Acc:HGNC:16290]
693	ENSBTAG00000001504	ENSBTAG00000001504	693.1.1	NOP14	ENSG00000087269	NOP14 nucleolar protein [Source:HGNC Symbol;Acc:HGNC:16821]
694	ENSBTAG00000001505	ENSBTAG00000001505	694.1.1	GRK4	ENSG00000125388	G protein-coupled receptor kinase 4 [Source:HGNC Symbol;Acc:HGNC:4543]
695	ENSBTAG00000001506	ENSBTAG00000001506	695.1.1	HTT	ENSG00000197386	huntingtin [Source:HGNC Symbol;Acc:HGNC:4851]
696	ENSBTAG00000001508	ENSBTAG00000001508	696.1.1	SH3RF1	ENSG00000154447	SH3 domain containing ring finger 1 [Source:HGNC Symbol;Acc:HGNC:17650]
697	ENSBTAG00000001509	ENSBTAG00000001509	697.1.1	ELK3	ENSG00000111145	ETS transcription factor ELK3 [Source:HGNC Symbol;Acc:HGNC:3325]
698	ENSBTAG00000001510	ENSBTAG00000001510	698.1.1	CDK17	ENSG00000059758	cyclin dependent kinase 17 [Source:HGNC Symbol;Acc:HGNC:8750]
699	ENSBTAG00000001511	ENSBTAG00000001511	699.1.1	BCL6	ENSG00000113916	BCL6 transcription repressor [Source:HGNC Symbol;Acc:HGNC:1001]
700	ENSBTAG00000001512	ENSBTAG00000001512	700.1.1	ZFP64	ENSG00000020256	ZFP64 zinc finger protein [Source:HGNC Symbol;Acc:HGNC:15940]
701	ENSBTAG00000001513	ENSBTAG00000001513	701.1.1	PDIK1L	ENSG00000175087	PDLIM1 interacting kinase 1 like [Source:HGNC Symbol;Acc:HGNC:18981]
702	ENSBTAG00000001517	ENSBTAG00000001517	702.1.1	KRT18	ENSG00000111057	keratin 18 [Source:HGNC Symbol;Acc:HGNC:6430]
703	ENSBTAG00000001518	ENSBTAG00000001518	703.1.1	ISG20L2	ENSG00000143319	interferon stimulated exonuclease gene 20 like 2 [Source:HGNC Symbol;Acc:HGNC:25745]
704	ENSBTAG00000001519	ENSBTAG00000001519	704.1.1	METTL25B	ENSG00000143303	methyltransferase like 25B [Source:HGNC Symbol;Acc:HGNC:24273]
705	ENSBTAG00000001520	ENSBTAG00000001520	705.1.1	MRPL24	ENSG00000143314	mitochondrial ribosomal protein L24 [Source:HGNC Symbol;Acc:HGNC:14037]
706	ENSBTAG00000001521	ENSBTAG00000001521	706.1.1	UQCRB	ENSG00000156467	ubiquinol-cytochrome c reductase binding protein [Source:HGNC Symbol;Acc:HGNC:12582]
707	ENSBTAG00000001522	ENSBTAG00000001522	707.1.1	MTERF3	ENSG00000156469	mitochondrial transcription termination factor 3 [Source:HGNC Symbol;Acc:HGNC:24258]
708	ENSBTAG00000001523	ENSBTAG00000001523	708.1.1	YES1	ENSG00000176105	YES proto-oncogene 1, Src family tyrosine kinase [Source:HGNC Symbol;Acc:HGNC:12841]
709	ENSBTAG00000001528	ENSBTAG00000001528	709.1.1	CDK13	ENSG00000065883	cyclin dependent kinase 13 [Source:HGNC Symbol;Acc:HGNC:1733]
710	ENSBTAG00000001529	ENSBTAG00000001529	710.1.1	NSD3	ENSG00000147548	nuclear receptor binding SET domain protein 3 [Source:HGNC Symbol;Acc:HGNC:12767]
711	ENSBTAG00000001533	ENSBTAG00000001533	711.1.1	HACE1	ENSG00000085382	HECT domain and ankyrin repeat containing E3 ubiquitin protein ligase 1 [Source:HGNC Symbol;Acc:HGNC:21033]
712	ENSBTAG00000001535	ENSBTAG00000001535	712.1.1	LIPH	ENSG00000163898	lipase H [Source:HGNC Symbol;Acc:HGNC:18483]
714	ENSBTAG00000001539	ENSBTAG00000001539	714.1.1	SAV1	ENSG00000151748	salvador family WW domain containing protein 1 [Source:HGNC Symbol;Acc:HGNC:17795]
715	ENSBTAG00000001543	ENSBTAG00000001543	715.1.1	BRI3BP	ENSG00000184992	BRI3 binding protein [Source:HGNC Symbol;Acc:HGNC:14251]
716	ENSBTAG00000001545	ENSBTAG00000001545	716.1.1	SLC34A2	ENSG00000157765	solute carrier family 34 member 2 [Source:HGNC Symbol;Acc:HGNC:11020]
717	ENSBTAG00000001546	ENSBTAG00000001546	717.1.1	MGAT1	ENSG00000131446	alpha-1,3-mannosyl-glycoprotein 2-beta-N-acetylglucosaminyltransferase [Source:HGNC Symbol;Acc:HGNC:7044]
718	ENSBTAG00000001548	ENSBTAG00000001548	718.1.1	UBQLN4	ENSG00000160803	ubiquilin 4 [Source:HGNC Symbol;Acc:HGNC:1237]
719	ENSBTAG00000001551	ENSBTAG00000001551	719.1.1	PLEKHG3	ENSG00000126822	pleckstrin homology and RhoGEF domain containing G3 [Source:HGNC Symbol;Acc:HGNC:20364]
720	ENSBTAG00000001552	ENSBTAG00000001552	720.1.1	EPC1	ENSG00000120616	enhancer of polycomb homolog 1 [Source:HGNC Symbol;Acc:HGNC:19876]
721	ENSBTAG00000001553	ENSBTAG00000001553	721.1.1	HNRNPA1	ENSG00000135486	heterogeneous nuclear ribonucleoprotein A1 [Source:HGNC Symbol;Acc:HGNC:5031]
722	ENSBTAG00000001557	ENSBTAG00000001557	722.1.1	CCL28	ENSG00000151882	C-C motif chemokine ligand 28 [Source:HGNC Symbol;Acc:HGNC:17700]
723	ENSBTAG00000001562	ENSBTAG00000001562	723.1.1	NFE2	ENSG00000123405	nuclear factor, erythroid 2 [Source:HGNC Symbol;Acc:HGNC:7780]
724	ENSBTAG00000001564	ENSBTAG00000001564	724.1.1	PDE4DIP	ENSG00000178104	phosphodiesterase 4D interacting protein [Source:HGNC Symbol;Acc:HGNC:15580]
725	ENSBTAG00000001565	ENSBTAG00000001565	725.1.1	MESD	ENSG00000117899	mesoderm development LRP chaperone [Source:HGNC Symbol;Acc:HGNC:13520]
726	ENSBTAG00000001567	ENSBTAG00000001567	726.1.1	LRRK1	ENSG00000154237	leucine rich repeat kinase 1 [Source:HGNC Symbol;Acc:HGNC:18608]
727	ENSBTAG00000001568	ENSBTAG00000001568	727.1.1	PPIC	ENSG00000168938	peptidylprolyl isomerase C [Source:HGNC Symbol;Acc:HGNC:9256]
728	ENSBTAG00000001572	ENSBTAG00000001572	728.1.1	NSUN7	ENSG00000179299	NOP2/Sun RNA methyltransferase family member 7 [Source:HGNC Symbol;Acc:HGNC:25857]
729	ENSBTAG00000001573	ENSBTAG00000001573	729.1.1	JMJD1C	ENSG00000171988	jumonji domain containing 1C [Source:HGNC Symbol;Acc:HGNC:12313]
730	ENSBTAG00000001574	ENSBTAG00000001574	730.1.1	GPATCH2	ENSG00000092978	G-patch domain containing 2 [Source:HGNC Symbol;Acc:HGNC:25499]
733	ENSBTAG00000001578	ENSBTAG00000001578	733.1.1	ADPGK	ENSG00000159322	ADP dependent glucokinase [Source:HGNC Symbol;Acc:HGNC:25250]
734	ENSBTAG00000001579	ENSBTAG00000001579	734.1.1	AGO2	ENSG00000123908	argonaute RISC catalytic component 2 [Source:HGNC Symbol;Acc:HGNC:3263]
736	ENSBTAG00000001586	ENSBTAG00000001586	736.1.1	OTUD7B	ENSG00000264522	OTU deubiquitinase 7B [Source:HGNC Symbol;Acc:HGNC:16683]
737	ENSBTAG00000001589	ENSBTAG00000001589	737.1.1	TM9SF2	ENSG00000125304	transmembrane 9 superfamily member 2 [Source:HGNC Symbol;Acc:HGNC:11865]
738	ENSBTAG00000001592	ENSBTAG00000001592	738.1.1	INSIG1	ENSG00000186480	insulin induced gene 1 [Source:HGNC Symbol;Acc:HGNC:6083]
739	ENSBTAG00000001593	ENSBTAG00000001593	739.1.1	OGFOD2	ENSG00000111325	2-oxoglutarate and iron dependent oxygenase domain containing 2 [Source:HGNC Symbol;Acc:HGNC:25823]
740	ENSBTAG00000001594	ENSBTAG00000001594	740.1.1	ARL6IP4	ENSG00000182196	ADP ribosylation factor like GTPase 6 interacting protein 4 [Source:HGNC Symbol;Acc:HGNC:18076]
741	ENSBTAG00000001597	ENSBTAG00000001597	741.1.1	PITPNM2	ENSG00000090975	phosphatidylinositol transfer protein membrane associated 2 [Source:HGNC Symbol;Acc:HGNC:21044]
742	ENSBTAG00000001598	ENSBTAG00000001598	742.1.1	MAP7	ENSG00000135525	microtubule associated protein 7 [Source:HGNC Symbol;Acc:HGNC:6869]
743	ENSBTAG00000001599	ENSBTAG00000001599	743.1.1	SV2A	ENSG00000159164	synaptic vesicle glycoprotein 2A [Source:HGNC Symbol;Acc:HGNC:20566]
744	ENSBTAG00000001600	ENSBTAG00000001600	744.1.1	DCUN1D4	ENSG00000109184	defective in cullin neddylation 1 domain containing 4 [Source:HGNC Symbol;Acc:HGNC:28998]
745	ENSBTAG00000001601	ENSBTAG00000001601	745.1.1	PKM	ENSG00000067225	pyruvate kinase M1/2 [Source:HGNC Symbol;Acc:HGNC:9021]
746	ENSBTAG00000001602	ENSBTAG00000001602	746.1.1	IL4R	ENSG00000077238	interleukin 4 receptor [Source:HGNC Symbol;Acc:HGNC:6015]
748	ENSBTAG00000001607	ENSBTAG00000001607	748.1.1	TMEM41B	ENSG00000166471	transmembrane protein 41B [Source:HGNC Symbol;Acc:HGNC:28948]
749	ENSBTAG00000001609	ENSBTAG00000001609	749.1.1	MAP2K6	ENSG00000108984	mitogen-activated protein kinase kinase 6 [Source:HGNC Symbol;Acc:HGNC:6846]
750	ENSBTAG00000001612	ENSBTAG00000001612	750.1.1	LSM1	ENSG00000175324	LSM1 homolog, mRNA degradation associated [Source:HGNC Symbol;Acc:HGNC:20472]
751	ENSBTAG00000001614	ENSBTAG00000001614	751.1.1	ZNF174	ENSG00000103343	zinc finger protein 174 [Source:HGNC Symbol;Acc:HGNC:12963]
752	ENSBTAG00000001616	ENSBTAG00000001616	752.1.1	ZNF592	ENSG00000166716	zinc finger protein 592 [Source:HGNC Symbol;Acc:HGNC:28986]
753	ENSBTAG00000001617	ENSBTAG00000001617	753.1.1	G2E3	ENSG00000092140	G2/M-phase specific E3 ubiquitin protein ligase [Source:HGNC Symbol;Acc:HGNC:20338]
754	ENSBTAG00000001618	ENSBTAG00000001618	754.1.1	ALPK3	ENSG00000136383	alpha kinase 3 [Source:HGNC Symbol;Acc:HGNC:17574]
755	ENSBTAG00000001619	ENSBTAG00000001619	755.1.1	SERINC5	ENSG00000164300	serine incorporator 5 [Source:HGNC Symbol;Acc:HGNC:18825]
756	ENSBTAG00000001626	ENSBTAG00000001626	756.1.1	CTPS1	ENSG00000171793	CTP synthase 1 [Source:HGNC Symbol;Acc:HGNC:2519]
757	ENSBTAG00000001628	ENSBTAG00000001628	757.1.1	SLFNL1	ENSG00000171790	schlafen like 1 [Source:HGNC Symbol;Acc:HGNC:26313]
758	ENSBTAG00000001629	ENSBTAG00000001629	758.1.1	SCMH1	ENSG00000010803	Scm polycomb group protein homolog 1 [Source:HGNC Symbol;Acc:HGNC:19003]
760	ENSBTAG00000001632	ENSBTAG00000001632	760.1.1	NBR1	ENSG00000188554	NBR1 autophagy cargo receptor [Source:HGNC Symbol;Acc:HGNC:6746]
761	ENSBTAG00000001634	ENSBTAG00000001634	761.1.1	PHF1	ENSG00000112511	PHD finger protein 1 [Source:HGNC Symbol;Acc:HGNC:8919]
762	ENSBTAG00000001635	ENSBTAG00000001635	762.1.1	CUTA	ENSG00000112514	cutA divalent cation tolerance homolog [Source:HGNC Symbol;Acc:HGNC:21101]
763	ENSBTAG00000001639	ENSBTAG00000001639	763.1.1	TRPM1	ENSG00000134160	transient receptor potential cation channel subfamily M member 1 [Source:HGNC Symbol;Acc:HGNC:7146]
764	ENSBTAG00000001640	ENSBTAG00000001640	764.1.1	EPB41L1	ENSG00000088367	erythrocyte membrane protein band 4.1 like 1 [Source:HGNC Symbol;Acc:HGNC:3378]
765	ENSBTAG00000001644	ENSBTAG00000001644	765.1.1	MDN1	ENSG00000112159	midasin AAA ATPase 1 [Source:HGNC Symbol;Acc:HGNC:18302]
766	ENSBTAG00000001645	ENSBTAG00000001645	766.1.1	AAR2	ENSG00000131043	AAR2 splicing factor [Source:HGNC Symbol;Acc:HGNC:15886]
767	ENSBTAG00000001647	ENSBTAG00000001647	767.1.1	PLEKHJ1	ENSG00000104886	pleckstrin homology domain containing J1 [Source:HGNC Symbol;Acc:HGNC:18211]
769	ENSBTAG00000001649	ENSBTAG00000001649	769.1.1	ZFPM2	ENSG00000169946	zinc finger protein, FOG family member 2 [Source:HGNC Symbol;Acc:HGNC:16700]
770	ENSBTAG00000001651	ENSBTAG00000001651	770.1.1	SYF2	ENSG00000117614	SYF2 pre-mRNA splicing factor [Source:HGNC Symbol;Acc:HGNC:19824]
771	ENSBTAG00000001652	ENSBTAG00000001652	771.1.1	SLCO3A1	ENSG00000176463	solute carrier organic anion transporter family member 3A1 [Source:HGNC Symbol;Acc:HGNC:10952]
772	ENSBTAG00000001654	ENSBTAG00000001654	772.1.1	SNTB2	ENSG00000168807	syntrophin beta 2 [Source:HGNC Symbol;Acc:HGNC:11169]
773	ENSBTAG00000001656	ENSBTAG00000001656	773.1.1	TMEM254	ENSG00000133678	transmembrane protein 254 [Source:HGNC Symbol;Acc:HGNC:25804]
774	ENSBTAG00000001657	ENSBTAG00000001657	774.1.1	PICALM	ENSG00000073921	phosphatidylinositol binding clathrin assembly protein [Source:HGNC Symbol;Acc:HGNC:15514]
775	ENSBTAG00000001659	ENSBTAG00000001659	775.1.1	VPS4A	ENSG00000132612	vacuolar protein sorting 4 homolog A [Source:HGNC Symbol;Acc:HGNC:13488]
776	ENSBTAG00000001660	ENSBTAG00000001660	776.1.1	SPTY2D1	ENSG00000179119	SPT2 chromatin protein domain containing 1 [Source:HGNC Symbol;Acc:HGNC:26818]
777	ENSBTAG00000001662	ENSBTAG00000001662	777.1.1	EHD3	ENSG00000013016	EH domain containing 3 [Source:HGNC Symbol;Acc:HGNC:3244]
778	ENSBTAG00000001663	ENSBTAG00000001663	778.1.1	PDF	ENSG00000258429	peptide deformylase, mitochondrial [Source:HGNC Symbol;Acc:HGNC:30012]
779	ENSBTAG00000001665	ENSBTAG00000001665	779.1.1	COG8	ENSG00000213380	component of oligomeric golgi complex 8 [Source:HGNC Symbol;Acc:HGNC:18623]
780	ENSBTAG00000001666	ENSBTAG00000001666	780.1.1	NIP7	ENSG00000132603	nucleolar pre-rRNA processing protein NIP7 [Source:HGNC Symbol;Acc:HGNC:24328]
782	ENSBTAG00000001673	ENSBTAG00000001673	782.1.1	C2CD5	ENSG00000111731	C2 calcium dependent domain containing 5 [Source:HGNC Symbol;Acc:HGNC:29062]
783	ENSBTAG00000001687	ENSBTAG00000001687	783.1.1	STC1	ENSG00000159167	stanniocalcin 1 [Source:HGNC Symbol;Acc:HGNC:11373]
784	ENSBTAG00000001692	ENSBTAG00000001692	784.1.1	NDST1	ENSG00000070614	N-deacetylase and N-sulfotransferase 1 [Source:HGNC Symbol;Acc:HGNC:7680]
785	ENSBTAG00000001693	ENSBTAG00000001693	785.1.1	RPAP1	ENSG00000103932	RNA polymerase II associated protein 1 [Source:HGNC Symbol;Acc:HGNC:24567]
786	ENSBTAG00000001694	ENSBTAG00000001694	786.1.1	TYRO3	ENSG00000092445	TYRO3 protein tyrosine kinase [Source:HGNC Symbol;Acc:HGNC:12446]
787	ENSBTAG00000001697	ENSBTAG00000001697	787.1.1	TRA2B	ENSG00000136527	transformer 2 beta homolog [Source:HGNC Symbol;Acc:HGNC:10781]
788	ENSBTAG00000001698	ENSBTAG00000001698	788.1.1	DERPC	ENSG00000286140	DERPC proline and glycine rich nuclear protein [Source:HGNC Symbol;Acc:HGNC:54084]
790	ENSBTAG00000001702	ENSBTAG00000001702	790.1.1	TMEM107	ENSG00000179029	transmembrane protein 107 [Source:HGNC Symbol;Acc:HGNC:28128]
791	ENSBTAG00000001707	ENSBTAG00000001707	791.1.1	UIMC1	ENSG00000087206	ubiquitin interaction motif containing 1 [Source:HGNC Symbol;Acc:HGNC:30298]
792	ENSBTAG00000001708	ENSBTAG00000001708	792.1.1	TTLL12	ENSG00000100304	tubulin tyrosine ligase like 12 [Source:HGNC Symbol;Acc:HGNC:28974]
793	ENSBTAG00000001710	ENSBTAG00000001710	793.1.1	CMTM8	ENSG00000170293	CKLF like MARVEL transmembrane domain containing 8 [Source:HGNC Symbol;Acc:HGNC:19179]
795	ENSBTAG00000001712	ENSBTAG00000001712	795.1.1	CMTM7	ENSG00000153551	CKLF like MARVEL transmembrane domain containing 7 [Source:HGNC Symbol;Acc:HGNC:19178]
796	ENSBTAG00000001714	ENSBTAG00000001714	796.1.1	MFSD9	ENSG00000135953	major facilitator superfamily domain containing 9 [Source:HGNC Symbol;Acc:HGNC:28158]
797	ENSBTAG00000001721	ENSBTAG00000001721	797.1.1	GYG1	ENSG00000163754	glycogenin 1 [Source:HGNC Symbol;Acc:HGNC:4699]
798	ENSBTAG00000001724	ENSBTAG00000001724	798.1.1	PTGR3	ENSG00000180011	prostaglandin reductase 3 [Source:HGNC Symbol;Acc:HGNC:28697]
799	ENSBTAG00000001725	ENSBTAG00000001725	799.1.1	CXCL10	ENSG00000169245	C-X-C motif chemokine ligand 10 [Source:HGNC Symbol;Acc:HGNC:10637]
800	ENSBTAG00000001728	ENSBTAG00000001728	800.1.1	IGSF10	ENSG00000152580	immunoglobulin superfamily member 10 [Source:HGNC Symbol;Acc:HGNC:26384]
801	ENSBTAG00000001729	ENSBTAG00000001729	801.1.1	DUSP10	ENSG00000143507	dual specificity phosphatase 10 [Source:HGNC Symbol;Acc:HGNC:3065]
802	ENSBTAG00000001731	ENSBTAG00000001731	802.1.1	GLYR1	ENSG00000140632	glyoxylate reductase 1 homolog [Source:HGNC Symbol;Acc:HGNC:24434]
803	ENSBTAG00000001735	ENSBTAG00000001735	803.1.1	ADAM11	ENSG00000073670	ADAM metallopeptidase domain 11 [Source:HGNC Symbol;Acc:HGNC:189]
804	ENSBTAG00000001736	ENSBTAG00000001736	804.1.1	UBN1	ENSG00000118900	ubinuclein 1 [Source:HGNC Symbol;Acc:HGNC:12506]
805	ENSBTAG00000001740	ENSBTAG00000001740	805.1.1	HAPLN3	ENSG00000140511	hyaluronan and proteoglycan link protein 3 [Source:HGNC Symbol;Acc:HGNC:21446]
806	ENSBTAG00000001741	ENSBTAG00000001741	806.1.1	DLGAP4	ENSG00000080845	DLG associated protein 4 [Source:HGNC Symbol;Acc:HGNC:24476]
807	ENSBTAG00000001744	ENSBTAG00000001744	807.1.1	BET1L	ENSG00000177951	Bet1 golgi vesicular membrane trafficking protein like [Source:HGNC Symbol;Acc:HGNC:19348]
808	ENSBTAG00000001745	ENSBTAG00000001745	808.1.1	LUM	ENSG00000139329	lumican [Source:HGNC Symbol;Acc:HGNC:6724]
809	ENSBTAG00000001747	ENSBTAG00000001747	809.1.1	PEX3	ENSG00000034693	peroxisomal biogenesis factor 3 [Source:HGNC Symbol;Acc:HGNC:8858]
810	ENSBTAG00000001748	ENSBTAG00000001748	810.1.1	TRIM45	ENSG00000134253	tripartite motif containing 45 [Source:HGNC Symbol;Acc:HGNC:19018]
811	ENSBTAG00000001749	ENSBTAG00000001749	811.1.1	SENP2	ENSG00000163904	SUMO specific peptidase 2 [Source:HGNC Symbol;Acc:HGNC:23116]
812	ENSBTAG00000001752	ENSBTAG00000001752	812.1.1	FUCA2	ENSG00000001036	alpha-L-fucosidase 2 [Source:HGNC Symbol;Acc:HGNC:4008]
813	ENSBTAG00000001754	ENSBTAG00000001754	813.1.1	AHCYL2	ENSG00000158467	adenosylhomocysteinase like 2 [Source:HGNC Symbol;Acc:HGNC:22204]
814	ENSBTAG00000001762	ENSBTAG00000001762	814.1.1	RFXANK	ENSG00000064490	regulatory factor X associated ankyrin containing protein [Source:HGNC Symbol;Acc:HGNC:9987]
815	ENSBTAG00000001763	ENSBTAG00000001763	815.1.1	NR2C2AP	ENSG00000184162	nuclear receptor 2C2 associated protein [Source:HGNC Symbol;Acc:HGNC:30763]
816	ENSBTAG00000001767	ENSBTAG00000001767	816.1.1	B4GALT7	ENSG00000027847	beta-1,4-galactosyltransferase 7 [Source:HGNC Symbol;Acc:HGNC:930]
817	ENSBTAG00000001770	ENSBTAG00000001770	817.1.1	ST8SIA5	ENSG00000101638	ST8 alpha-N-acetyl-neuraminide alpha-2,8-sialyltransferase 5 [Source:HGNC Symbol;Acc:HGNC:17827]
818	ENSBTAG00000001771	ENSBTAG00000001771	818.1.1	DYRK1A	ENSG00000157540	dual specificity tyrosine phosphorylation regulated kinase 1A [Source:HGNC Symbol;Acc:HGNC:3091]
820	ENSBTAG00000001774	ENSBTAG00000001774	820.1.1	SPRY2	ENSG00000136158	sprouty RTK signaling antagonist 2 [Source:HGNC Symbol;Acc:HGNC:11270]
821	ENSBTAG00000001775	ENSBTAG00000001775	821.1.1	RINL	ENSG00000187994	Ras and Rab interactor like [Source:HGNC Symbol;Acc:HGNC:24795]
822	ENSBTAG00000001776	ENSBTAG00000001776	822.1.1	SIRT2	ENSG00000068903	sirtuin 2 [Source:HGNC Symbol;Acc:HGNC:10886]
823	ENSBTAG00000001777	ENSBTAG00000001777	823.1.1	RPLP2	ENSG00000177600	ribosomal protein lateral stalk subunit P2 [Source:HGNC Symbol;Acc:HGNC:10377]
824	ENSBTAG00000001778	ENSBTAG00000001778	824.1.1	NFKBIB	ENSG00000104825	NFKB inhibitor beta [Source:HGNC Symbol;Acc:HGNC:7798]
825	ENSBTAG00000001780	ENSBTAG00000001780	825.1.1	SARS2	ENSG00000104835	seryl-tRNA synthetase 2, mitochondrial [Source:HGNC Symbol;Acc:HGNC:17697]
826	ENSBTAG00000001781	ENSBTAG00000001781	826.1.1	TOMM40	ENSG00000130204	translocase of outer mitochondrial membrane 40 [Source:HGNC Symbol;Acc:HGNC:18001]
827	ENSBTAG00000001782	ENSBTAG00000001782	827.1.1	MRPS12	ENSG00000128626	mitochondrial ribosomal protein S12 [Source:HGNC Symbol;Acc:HGNC:10380]
828	ENSBTAG00000001785	ENSBTAG00000001785	828.1.1	TGM3	ENSG00000125780	transglutaminase 3 [Source:HGNC Symbol;Acc:HGNC:11779]
829	ENSBTAG00000001786	ENSBTAG00000001786	829.1.1	HYKK	ENSG00000188266	hydroxylysine kinase [Source:HGNC Symbol;Acc:HGNC:34403]
830	ENSBTAG00000001788	ENSBTAG00000001788	830.1.1	PDPN	ENSG00000162493	podoplanin [Source:HGNC Symbol;Acc:HGNC:29602]
831	ENSBTAG00000001790	ENSBTAG00000001790	831.1.1	SAFB2	ENSG00000130254	scaffold attachment factor B2 [Source:HGNC Symbol;Acc:HGNC:21605]
832	ENSBTAG00000001793	ENSBTAG00000001793	832.1.1	HSD11B1L	ENSG00000167733	hydroxysteroid 11-beta dehydrogenase 1 like [Source:HGNC Symbol;Acc:HGNC:30419]
834	ENSBTAG00000001795	ENSBTAG00000001795	834.1.1	LONP1	ENSG00000196365	lon peptidase 1, mitochondrial [Source:HGNC Symbol;Acc:HGNC:9479]
835	ENSBTAG00000001796	ENSBTAG00000001796	835.1.1	CATSPERD	ENSG00000174898	cation channel sperm associated auxiliary subunit delta [Source:HGNC Symbol;Acc:HGNC:28598]
836	ENSBTAG00000001801	ENSBTAG00000001801	836.1.1	SYT4	ENSG00000132872	synaptotagmin 4 [Source:HGNC Symbol;Acc:HGNC:11512]
837	ENSBTAG00000001803	ENSBTAG00000001803	837.1.1	FHL5	ENSG00000112214	four and a half LIM domains 5 [Source:HGNC Symbol;Acc:HGNC:17371]
838	ENSBTAG00000001805	ENSBTAG00000001805	838.1.1	TWSG1	ENSG00000128791	twisted gastrulation BMP signaling modulator 1 [Source:HGNC Symbol;Acc:HGNC:12429]
840	ENSBTAG00000001808	ENSBTAG00000001808	840.1.1	LACTB2	ENSG00000147592	lactamase beta 2 [Source:HGNC Symbol;Acc:HGNC:18512]
841	ENSBTAG00000001810	ENSBTAG00000001810	841.1.1	SCAF11	ENSG00000139218	SR-related CTD associated factor 11 [Source:HGNC Symbol;Acc:HGNC:10784]
842	ENSBTAG00000001814	ENSBTAG00000001814	842.1.1	PLXND1	ENSG00000004399	plexin D1 [Source:HGNC Symbol;Acc:HGNC:9107]
843	ENSBTAG00000001815	ENSBTAG00000001815	843.1.1	ARHGEF5	ENSG00000050327	Rho guanine nucleotide exchange factor 5 [Source:HGNC Symbol;Acc:HGNC:13209]
844	ENSBTAG00000001816	ENSBTAG00000001816	844.1.1	SLC25A42	ENSG00000181035	solute carrier family 25 member 42 [Source:HGNC Symbol;Acc:HGNC:28380]
845	ENSBTAG00000001817	ENSBTAG00000001817	845.1.1	TMEM161A	ENSG00000064545	transmembrane protein 161A [Source:HGNC Symbol;Acc:HGNC:26020]
846	ENSBTAG00000001818	ENSBTAG00000001818	846.1.1	MEF2B	ENSG00000213999	myocyte enhancer factor 2B [Source:HGNC Symbol;Acc:HGNC:6995]
847	ENSBTAG00000001821	ENSBTAG00000001821	847.1.1	PRRC2C	ENSG00000117523	proline rich coiled-coil 2C [Source:HGNC Symbol;Acc:HGNC:24903]
848	ENSBTAG00000001822	ENSBTAG00000001822	848.1.1	SNX10	ENSG00000086300	sorting nexin 10 [Source:HGNC Symbol;Acc:HGNC:14974]
849	ENSBTAG00000001823	ENSBTAG00000001823	849.1.1	STC2	ENSG00000113739	stanniocalcin 2 [Source:HGNC Symbol;Acc:HGNC:11374]
850	ENSBTAG00000001824	ENSBTAG00000001824	850.1.1	SLC2A6	ENSG00000160326	solute carrier family 2 member 6 [Source:HGNC Symbol;Acc:HGNC:11011]
851	ENSBTAG00000001826	ENSBTAG00000001826	851.1.1	SASH1	ENSG00000111961	SAM and SH3 domain containing 1 [Source:HGNC Symbol;Acc:HGNC:19182]
852	ENSBTAG00000001827	ENSBTAG00000001827	852.1.1	GID8	ENSG00000101193	GID complex subunit 8 homolog [Source:HGNC Symbol;Acc:HGNC:15857]
853	ENSBTAG00000001828	ENSBTAG00000001828	853.1.1	SCRN2	ENSG00000141295	secernin 2 [Source:HGNC Symbol;Acc:HGNC:30381]
854	ENSBTAG00000001829	ENSBTAG00000001829	854.1.1	SLC17A9	ENSG00000101194	solute carrier family 17 member 9 [Source:HGNC Symbol;Acc:HGNC:16192]
855	ENSBTAG00000001832	ENSBTAG00000001832	855.1.1	MRPL10	ENSG00000159111	mitochondrial ribosomal protein L10 [Source:HGNC Symbol;Acc:HGNC:14055]
856	ENSBTAG00000001834	ENSBTAG00000001834	856.1.1	PNKP	ENSG00000039650	polynucleotide kinase 3'-phosphatase [Source:HGNC Symbol;Acc:HGNC:9154]
857	ENSBTAG00000001835	ENSBTAG00000001835	857.1.1	GJA1	ENSG00000152661	gap junction protein alpha 1 [Source:HGNC Symbol;Acc:HGNC:4274]
858	ENSBTAG00000001838	ENSBTAG00000001838	858.1.1	LRRC36	ENSG00000159708	leucine rich repeat containing 36 [Source:HGNC Symbol;Acc:HGNC:25615]
859	ENSBTAG00000001839	ENSBTAG00000001839	859.1.1	OCIAD2	ENSG00000145247	OCIA domain containing 2 [Source:HGNC Symbol;Acc:HGNC:28685]
860	ENSBTAG00000001840	ENSBTAG00000001840	860.1.1	INO80B	ENSG00000115274	INO80 complex subunit B [Source:HGNC Symbol;Acc:HGNC:13324]
861	ENSBTAG00000001842	ENSBTAG00000001842	861.1.1	GSTM3	ENSG00000134202	glutathione S-transferase mu 3 [Source:HGNC Symbol;Acc:HGNC:4635]
862	ENSBTAG00000001843	ENSBTAG00000001843	862.1.1	WBP1	ENSG00000239779	WW domain binding protein 1 [Source:HGNC Symbol;Acc:HGNC:12737]
863	ENSBTAG00000001844	ENSBTAG00000001844	863.1.1	MOGS	ENSG00000115275	mannosyl-oligosaccharide glucosidase [Source:HGNC Symbol;Acc:HGNC:24862]
864	ENSBTAG00000001847	ENSBTAG00000001847	864.1.1	CNTLN	ENSG00000044459	centlein [Source:HGNC Symbol;Acc:HGNC:23432]
865	ENSBTAG00000001848	ENSBTAG00000001848	865.1.1	KATNB1	ENSG00000140854	katanin regulatory subunit B1 [Source:HGNC Symbol;Acc:HGNC:6217]
866	ENSBTAG00000001852	ENSBTAG00000001852	866.1.1	CES1	ENSG00000198848	carboxylesterase 1 [Source:HGNC Symbol;Acc:HGNC:1863]
867	ENSBTAG00000001854	ENSBTAG00000001854	867.1.1	CIAPIN1	ENSG00000005194	cytokine induced apoptosis inhibitor 1 [Source:HGNC Symbol;Acc:HGNC:28050]
868	ENSBTAG00000001855	ENSBTAG00000001855	868.1.1	COQ9	ENSG00000088682	coenzyme Q9 [Source:HGNC Symbol;Acc:HGNC:25302]
869	ENSBTAG00000001856	ENSBTAG00000001856	869.1.1	POLR2C	ENSG00000102978	RNA polymerase II subunit C [Source:HGNC Symbol;Acc:HGNC:9189]
870	ENSBTAG00000001857	ENSBTAG00000001857	870.1.1	DOK4	ENSG00000125170	docking protein 4 [Source:HGNC Symbol;Acc:HGNC:19868]
871	ENSBTAG00000001861	ENSBTAG00000001861	871.1.1	SESTD1	ENSG00000187231	SEC14 and spectrin domain containing 1 [Source:HGNC Symbol;Acc:HGNC:18379]
872	ENSBTAG00000001862	ENSBTAG00000001862	872.1.1	PPP2R2B	ENSG00000156475	protein phosphatase 2 regulatory subunit Bbeta [Source:HGNC Symbol;Acc:HGNC:9305]
873	ENSBTAG00000001864	ENSBTAG00000001864	873.1.1	NR4A3	ENSG00000119508	nuclear receptor subfamily 4 group A member 3 [Source:HGNC Symbol;Acc:HGNC:7982]
874	ENSBTAG00000001867	ENSBTAG00000001867	874.1.1	SACS	ENSG00000151835	sacsin molecular chaperone [Source:HGNC Symbol;Acc:HGNC:10519]
875	ENSBTAG00000001868	ENSBTAG00000001868	875.1.1	PCYT2	ENSG00000185813	phosphate cytidylyltransferase 2, ethanolamine [Source:HGNC Symbol;Acc:HGNC:8756]
876	ENSBTAG00000001872	ENSBTAG00000001872	876.1.1	ORC6	ENSG00000091651	origin recognition complex subunit 6 [Source:HGNC Symbol;Acc:HGNC:17151]
877	ENSBTAG00000001874	ENSBTAG00000001874	877.1.1	DOCK3	ENSG00000088538	dedicator of cytokinesis 3 [Source:HGNC Symbol;Acc:HGNC:2989]
878	ENSBTAG00000001879	ENSBTAG00000001879	878.1.1	PER2	ENSG00000132326	period circadian regulator 2 [Source:HGNC Symbol;Acc:HGNC:8846]
879	ENSBTAG00000001881	ENSBTAG00000001881	879.1.1	SLC10A1	ENSG00000100652	solute carrier family 10 member 1 [Source:HGNC Symbol;Acc:HGNC:10905]
880	ENSBTAG00000001882	ENSBTAG00000001882	880.1.1	CD79A	ENSG00000105369	CD79a molecule [Source:HGNC Symbol;Acc:HGNC:1698]
881	ENSBTAG00000001887	ENSBTAG00000001887	881.1.1	STAM2	ENSG00000115145	signal transducing adaptor molecule 2 [Source:HGNC Symbol;Acc:HGNC:11358]
882	ENSBTAG00000001888	ENSBTAG00000001888	882.1.1	MED13L	ENSG00000123066	mediator complex subunit 13L [Source:HGNC Symbol;Acc:HGNC:22962]
883	ENSBTAG00000001890	ENSBTAG00000001890	883.1.1	RUBCN	ENSG00000145016	rubicon autophagy regulator [Source:HGNC Symbol;Acc:HGNC:28991]
884	ENSBTAG00000001894	ENSBTAG00000001894	884.1.1	NEDD1	ENSG00000139350	NEDD1 gamma-tubulin ring complex targeting factor [Source:HGNC Symbol;Acc:HGNC:7723]
885	ENSBTAG00000001895	ENSBTAG00000001895	885.1.1	PGGT1B	ENSG00000164219	protein geranylgeranyltransferase type I subunit beta [Source:HGNC Symbol;Acc:HGNC:8895]
886	ENSBTAG00000001898	ENSBTAG00000001898	886.1.1	CCDC112	ENSG00000164221	coiled-coil domain containing 112 [Source:HGNC Symbol;Acc:HGNC:28599]
887	ENSBTAG00000001902	ENSBTAG00000001902	887.1.1	CEP295	ENSG00000166004	centrosomal protein 295 [Source:HGNC Symbol;Acc:HGNC:29366]
888	ENSBTAG00000001904	ENSBTAG00000001904	888.1.1	ZNF276	ENSG00000158805	zinc finger protein 276 [Source:HGNC Symbol;Acc:HGNC:23330]
889	ENSBTAG00000001906	ENSBTAG00000001906	889.1.1	FANCA	ENSG00000187741	FA complementation group A [Source:HGNC Symbol;Acc:HGNC:3582]
890	ENSBTAG00000001908	ENSBTAG00000001908	890.1.1	DLD	ENSG00000091140	dihydrolipoamide dehydrogenase [Source:HGNC Symbol;Acc:HGNC:2898]
891	ENSBTAG00000001918	ENSBTAG00000001918	891.1.1	STXBP5L	ENSG00000145087	syntaxin binding protein 5L [Source:HGNC Symbol;Acc:HGNC:30757]
892	ENSBTAG00000001919	ENSBTAG00000001919	892.1.1	ZNF652	ENSG00000198740	zinc finger protein 652 [Source:HGNC Symbol;Acc:HGNC:29147]
893	ENSBTAG00000001920	ENSBTAG00000001920	893.1.1	POLQ	ENSG00000051341	DNA polymerase theta [Source:HGNC Symbol;Acc:HGNC:9186]
894	ENSBTAG00000001922	ENSBTAG00000001922	894.1.1	AKIP1	ENSG00000166452	A-kinase interacting protein 1 [Source:HGNC Symbol;Acc:HGNC:1170]
895	ENSBTAG00000001926	ENSBTAG00000001926	895.1.1	RAD23B	ENSG00000119318	RAD23 homolog B, nucleotide excision repair protein [Source:HGNC Symbol;Acc:HGNC:9813]
896	ENSBTAG00000001927	ENSBTAG00000001927	896.1.1	ATP6V1C2	ENSG00000143882	ATPase H+ transporting V1 subunit C2 [Source:HGNC Symbol;Acc:HGNC:18264]
897	ENSBTAG00000001928	ENSBTAG00000001928	897.1.1	PDIA6	ENSG00000143870	protein disulfide isomerase family A member 6 [Source:HGNC Symbol;Acc:HGNC:30168]
898	ENSBTAG00000001931	ENSBTAG00000001931	898.1.1	TRABD	ENSG00000170638	TraB domain containing [Source:HGNC Symbol;Acc:HGNC:28805]
899	ENSBTAG00000001932	ENSBTAG00000001932	899.1.1	CRAT	ENSG00000095321	carnitine O-acetyltransferase [Source:HGNC Symbol;Acc:HGNC:2342]
900	ENSBTAG00000001933	ENSBTAG00000001933	900.1.1	PTPA	ENSG00000119383	protein phosphatase 2 phosphatase activator [Source:HGNC Symbol;Acc:HGNC:9308]
901	ENSBTAG00000001936	ENSBTAG00000001936	901.1.1	PCK1	ENSG00000124253	phosphoenolpyruvate carboxykinase 1 [Source:HGNC Symbol;Acc:HGNC:8724]
902	ENSBTAG00000001937	ENSBTAG00000001937	902.1.1	ANAPC11	ENSG00000141552	anaphase promoting complex subunit 11 [Source:HGNC Symbol;Acc:HGNC:14452]
903	ENSBTAG00000001938	ENSBTAG00000001938	903.1.1	CKS2	ENSG00000123975	CDC28 protein kinase regulatory subunit 2 [Source:HGNC Symbol;Acc:HGNC:2000]
904	ENSBTAG00000001939	ENSBTAG00000001939	904.1.1	SECISBP2	ENSG00000187742	SECIS binding protein 2 [Source:HGNC Symbol;Acc:HGNC:30972]
905	ENSBTAG00000001941	ENSBTAG00000001941	905.1.1	SEMA4D	ENSG00000187764	semaphorin 4D [Source:HGNC Symbol;Acc:HGNC:10732]
906	ENSBTAG00000001942	ENSBTAG00000001942	906.1.1	SNX27	ENSG00000143376	sorting nexin 27 [Source:HGNC Symbol;Acc:HGNC:20073]
907	ENSBTAG00000001945	ENSBTAG00000001945	907.1.1	ARG2	ENSG00000081181	arginase 2 [Source:HGNC Symbol;Acc:HGNC:664]
908	ENSBTAG00000001947	ENSBTAG00000001947	908.1.1	ZNF514	ENSG00000144026	zinc finger protein 514 [Source:HGNC Symbol;Acc:HGNC:25894]
909	ENSBTAG00000001948	ENSBTAG00000001948	909.1.1	VTI1B	ENSG00000100568	vesicle transport through interaction with t-SNAREs 1B [Source:HGNC Symbol;Acc:HGNC:17793]
910	ENSBTAG00000001950	ENSBTAG00000001950	910.1.1	RDH11	ENSG00000072042	retinol dehydrogenase 11 [Source:HGNC Symbol;Acc:HGNC:17964]
911	ENSBTAG00000001952	ENSBTAG00000001952	911.1.1	PROM2	ENSG00000155066	prominin 2 [Source:HGNC Symbol;Acc:HGNC:20685]
912	ENSBTAG00000001956	ENSBTAG00000001956	912.1.1	HINT3	ENSG00000111911	histidine triad nucleotide binding protein 3 [Source:HGNC Symbol;Acc:HGNC:18468]
913	ENSBTAG00000001957	ENSBTAG00000001957	913.1.1	TRMT11	ENSG00000066651	tRNA methyltransferase 11 homolog [Source:HGNC Symbol;Acc:HGNC:21080]
914	ENSBTAG00000001961	ENSBTAG00000001961	914.1.1	MAP1B	ENSG00000131711	microtubule associated protein 1B [Source:HGNC Symbol;Acc:HGNC:6836]
915	ENSBTAG00000001962	ENSBTAG00000001962	915.1.1	MRPS27	ENSG00000113048	mitochondrial ribosomal protein S27 [Source:HGNC Symbol;Acc:HGNC:14512]
916	ENSBTAG00000001966	ENSBTAG00000001966	916.1.1	PDGFRL	ENSG00000104213	platelet derived growth factor receptor like [Source:HGNC Symbol;Acc:HGNC:8805]
917	ENSBTAG00000001968	ENSBTAG00000001968	917.1.1	TTC14	ENSG00000163728	tetratricopeptide repeat domain 14 [Source:HGNC Symbol;Acc:HGNC:24697]
918	ENSBTAG00000001969	ENSBTAG00000001969	918.1.1	CCDC39	ENSG00000284862	coiled-coil domain 39 molecular ruler complex subunit [Source:HGNC Symbol;Acc:HGNC:25244]
919	ENSBTAG00000001981	ENSBTAG00000001981	919.1.1	SLC6A17	ENSG00000197106	solute carrier family 6 member 17 [Source:HGNC Symbol;Acc:HGNC:31399]
920	ENSBTAG00000001983	ENSBTAG00000001983	920.1.1	SMAGP	ENSG00000170545	small cell adhesion glycoprotein [Source:HGNC Symbol;Acc:HGNC:26918]
921	ENSBTAG00000001987	ENSBTAG00000001987	921.1.1	SWAP70	ENSG00000133789	switching B cell complex subunit SWAP70 [Source:HGNC Symbol;Acc:HGNC:17070]
922	ENSBTAG00000001988	ENSBTAG00000001988	922.1.1	EIF3D	ENSG00000100353	eukaryotic translation initiation factor 3 subunit D [Source:HGNC Symbol;Acc:HGNC:3278]
923	ENSBTAG00000001992	ENSBTAG00000001992	923.1.1	CYP51A1	ENSG00000001630	cytochrome P450 family 51 subfamily A member 1 [Source:HGNC Symbol;Acc:HGNC:2649]
925	ENSBTAG00000001997	ENSBTAG00000001997	925.1.1	MROH2B	ENSG00000171495	maestro heat like repeat family member 2B [Source:HGNC Symbol;Acc:HGNC:26857]
926	ENSBTAG00000001999	ENSBTAG00000001999	926.1.1	NKAPD1	ENSG00000150776	NKAP domain containing 1 [Source:HGNC Symbol;Acc:HGNC:25569]
927	ENSBTAG00000002000	ENSBTAG00000002000	927.1.1	TIMM8B	ENSG00000150779	translocase of inner mitochondrial membrane 8 homolog B [Source:HGNC Symbol;Acc:HGNC:11818]
928	ENSBTAG00000002004	ENSBTAG00000002004	928.1.1	LLPH	ENSG00000139233	LLP homolog, long-term synaptic facilitation factor [Source:HGNC Symbol;Acc:HGNC:28229]
929	ENSBTAG00000002006	ENSBTAG00000002006	929.1.1	THBS1	ENSG00000137801	thrombospondin 1 [Source:HGNC Symbol;Acc:HGNC:11785]
930	ENSBTAG00000002010	ENSBTAG00000002010	930.1.1	PI4K2A	ENSG00000155252	phosphatidylinositol 4-kinase type 2 alpha [Source:HGNC Symbol;Acc:HGNC:30031]
931	ENSBTAG00000002011	ENSBTAG00000002011	931.1.1	MATCAP2	ENSG00000164542	microtubule associated tyrosine carboxypeptidase 2 [Source:HGNC Symbol;Acc:HGNC:22206]
932	ENSBTAG00000002014	ENSBTAG00000002014	932.1.1	SNX1	ENSG00000028528	sorting nexin 1 [Source:HGNC Symbol;Acc:HGNC:11172]
933	ENSBTAG00000002018	ENSBTAG00000002018	933.1.1	EIF5A	ENSG00000132507	eukaryotic translation initiation factor 5A [Source:HGNC Symbol;Acc:HGNC:3300]
933	ENSBTAG00000002018	ENSBTAG00000002018	933.1.2	EIF5AL1	ENSG00000253626	eukaryotic translation initiation factor 5A like 1 [Source:HGNC Symbol;Acc:HGNC:17419]
934	ENSBTAG00000002019	ENSBTAG00000002019	934.1.1	SERPINB5	ENSG00000206075	serpin family B member 5 [Source:HGNC Symbol;Acc:HGNC:8949]
935	ENSBTAG00000002020	ENSBTAG00000002020	935.1.1	CREBRF	ENSG00000164463	CREB3 regulatory factor [Source:HGNC Symbol;Acc:HGNC:24050]
936	ENSBTAG00000002021	ENSBTAG00000002021	936.1.1	BNIP1	ENSG00000113734	BCL2 interacting protein 1 [Source:HGNC Symbol;Acc:HGNC:1082]
937	ENSBTAG00000002023	ENSBTAG00000002023	937.1.1	NOS1	ENSG00000089250	nitric oxide synthase 1 [Source:HGNC Symbol;Acc:HGNC:7872]
938	ENSBTAG00000002025	ENSBTAG00000002025	938.1.1	AMIGO2	ENSG00000139211	adhesion molecule with Ig like domain 2 [Source:HGNC Symbol;Acc:HGNC:24073]
941	ENSBTAG00000002033	ENSBTAG00000002033	941.1.1	UBXN2A	ENSG00000173960	UBX domain protein 2A [Source:HGNC Symbol;Acc:HGNC:27265]
942	ENSBTAG00000002034	ENSBTAG00000002034	942.1.1	MFSD2B	ENSG00000205639	MFSD2 lysolipid transporter B, sphingolipid [Source:HGNC Symbol;Acc:HGNC:37207]
943	ENSBTAG00000002036	ENSBTAG00000002036	943.1.1	CACNB1	ENSG00000067191	calcium voltage-gated channel auxiliary subunit beta 1 [Source:HGNC Symbol;Acc:HGNC:1401]
944	ENSBTAG00000002037	ENSBTAG00000002037	944.1.1	ATXN7L1	ENSG00000146776	ataxin 7 like 1 [Source:HGNC Symbol;Acc:HGNC:22210]
945	ENSBTAG00000002038	ENSBTAG00000002038	945.1.1	RPL14	ENSG00000188846	ribosomal protein L14 [Source:HGNC Symbol;Acc:HGNC:10305]
946	ENSBTAG00000002039	ENSBTAG00000002039	946.1.1	FRMD8	ENSG00000126391	FERM domain containing 8 [Source:HGNC Symbol;Acc:HGNC:25462]
948	ENSBTAG00000002044	ENSBTAG00000002044	948.1.1	SIRT3	ENSG00000142082	sirtuin 3 [Source:HGNC Symbol;Acc:HGNC:14931]
950	ENSBTAG00000002048	ENSBTAG00000002048	950.1.1	PTPN11	ENSG00000179295	protein tyrosine phosphatase non-receptor type 11 [Source:HGNC Symbol;Acc:HGNC:9644]
951	ENSBTAG00000002049	ENSBTAG00000002049	951.1.1	HADH	ENSG00000138796	hydroxyacyl-CoA dehydrogenase [Source:HGNC Symbol;Acc:HGNC:4799]
953	ENSBTAG00000002051	ENSBTAG00000002051	953.1.1	ARAP1	ENSG00000186635	ArfGAP with RhoGAP domain, ankyrin repeat and PH domain 1 [Source:HGNC Symbol;Acc:HGNC:16925]
954	ENSBTAG00000002052	ENSBTAG00000002052	954.1.1	PLOD1	ENSG00000083444	procollagen-lysine,2-oxoglutarate 5-dioxygenase 1 [Source:HGNC Symbol;Acc:HGNC:9081]
955	ENSBTAG00000002055	ENSBTAG00000002055	955.1.1	ZFP28	ENSG00000196867	ZFP28 zinc finger protein [Source:HGNC Symbol;Acc:HGNC:17801]
956	ENSBTAG00000002056	ENSBTAG00000002056	956.1.1	MARS2	ENSG00000247626	methionyl-tRNA synthetase 2, mitochondrial [Source:HGNC Symbol;Acc:HGNC:25133]
957	ENSBTAG00000002058	ENSBTAG00000002058	957.1.1	ASF1A	ENSG00000111875	anti-silencing function 1A histone chaperone [Source:HGNC Symbol;Acc:HGNC:20995]
958	ENSBTAG00000002059	ENSBTAG00000002059	958.1.1	MCM9	ENSG00000111877	minichromosome maintenance 9 homologous recombination repair factor [Source:HGNC Symbol;Acc:HGNC:21484]
959	ENSBTAG00000002060	ENSBTAG00000002060	959.1.1	RPL19	ENSG00000108298	ribosomal protein L19 [Source:HGNC Symbol;Acc:HGNC:10312]
960	ENSBTAG00000002062	ENSBTAG00000002062	960.1.1	TRPA1	ENSG00000104321	transient receptor potential cation channel subfamily A member 1 [Source:HGNC Symbol;Acc:HGNC:497]
961	ENSBTAG00000002065	ENSBTAG00000002065	961.1.1	TFAP2C	ENSG00000087510	transcription factor AP-2 gamma [Source:HGNC Symbol;Acc:HGNC:11744]
962	ENSBTAG00000002068	ENSBTAG00000002068	962.1.1	TAGLN2	ENSG00000158710	transgelin 2 [Source:HGNC Symbol;Acc:HGNC:11554]
964	ENSBTAG00000002070	ENSBTAG00000002070	964.1.1	KLC3	ENSG00000104892	kinesin light chain 3 [Source:HGNC Symbol;Acc:HGNC:20717]
965	ENSBTAG00000002072	ENSBTAG00000002072	965.1.1	ERCC2	ENSG00000104884	ERCC excision repair 2, TFIIH core complex helicase subunit [Source:HGNC Symbol;Acc:HGNC:3434]
966	ENSBTAG00000002073	ENSBTAG00000002073	966.1.1	RAD17	ENSG00000152942	RAD17 checkpoint clamp loader component [Source:HGNC Symbol;Acc:HGNC:9807]
967	ENSBTAG00000002075	ENSBTAG00000002075	967.1.1	MME	ENSG00000196549	membrane metalloendopeptidase [Source:HGNC Symbol;Acc:HGNC:7154]
968	ENSBTAG00000002076	ENSBTAG00000002076	968.1.1	STAU2	ENSG00000040341	staufen double-stranded RNA binding protein 2 [Source:HGNC Symbol;Acc:HGNC:11371]
969	ENSBTAG00000002078	ENSBTAG00000002078	969.1.1	KDM4A	ENSG00000066135	lysine demethylase 4A [Source:HGNC Symbol;Acc:HGNC:22978]
970	ENSBTAG00000002082	ENSBTAG00000002082	970.1.1	MARCKS	ENSG00000277443	myristoylated alanine rich protein kinase C substrate [Source:HGNC Symbol;Acc:HGNC:6759]
971	ENSBTAG00000002083	ENSBTAG00000002083	971.1.1	AUTS2	ENSG00000158321	activator of transcription and developmental regulator AUTS2 [Source:HGNC Symbol;Acc:HGNC:14262]
972	ENSBTAG00000002084	ENSBTAG00000002084	972.1.1	UNC5C	ENSG00000182168	unc-5 netrin receptor C [Source:HGNC Symbol;Acc:HGNC:12569]
973	ENSBTAG00000002086	ENSBTAG00000002086	973.1.1	PRP4K	ENSG00000112739	pre-mRNA processing factor kinase PRP4K [Source:HGNC Symbol;Acc:HGNC:17346]
974	ENSBTAG00000002090	ENSBTAG00000002090	974.1.1	CPSF4	ENSG00000160917	cleavage and polyadenylation specific factor 4 [Source:HGNC Symbol;Acc:HGNC:2327]
975	ENSBTAG00000002092	ENSBTAG00000002092	975.1.1	PI16	ENSG00000164530	peptidase inhibitor 16 [Source:HGNC Symbol;Acc:HGNC:21245]
976	ENSBTAG00000002094	ENSBTAG00000002094	976.1.1	ATP5MF	ENSG00000241468	ATP synthase membrane subunit f [Source:HGNC Symbol;Acc:HGNC:848]
977	ENSBTAG00000002095	ENSBTAG00000002095	977.1.1	MEN1	ENSG00000133895	menin 1 [Source:HGNC Symbol;Acc:HGNC:7010]
978	ENSBTAG00000002096	ENSBTAG00000002096	978.1.1	FCGR3B	ENSG00000162747	Fc gamma receptor IIIb [Source:HGNC Symbol;Acc:HGNC:3620]
978	ENSBTAG00000002096	ENSBTAG00000002096	978.1.2	FCGR3A	ENSG00000203747	Fc gamma receptor IIIa [Source:HGNC Symbol;Acc:HGNC:3619]
979	ENSBTAG00000002097	ENSBTAG00000002097	979.1.1	TMC5	ENSG00000103534	transmembrane channel like 5 [Source:HGNC Symbol;Acc:HGNC:22999]
980	ENSBTAG00000002098	ENSBTAG00000002098	980.1.1	CDC34	ENSG00000099804	cell division cycle 34, ubiqiutin conjugating enzyme [Source:HGNC Symbol;Acc:HGNC:1734]
981	ENSBTAG00000002101	ENSBTAG00000002101	981.1.1	GDE1	ENSG00000006007	glycerophosphodiester phosphodiesterase 1 [Source:HGNC Symbol;Acc:HGNC:29644]
982	ENSBTAG00000002103	ENSBTAG00000002103	982.1.1	PLCG2	ENSG00000197943	phospholipase C gamma 2 [Source:HGNC Symbol;Acc:HGNC:9066]
983	ENSBTAG00000002105	ENSBTAG00000002105	983.1.1	TEX261	ENSG00000144043	testis expressed 261 [Source:HGNC Symbol;Acc:HGNC:30712]
984	ENSBTAG00000002107	ENSBTAG00000002107	984.1.1	FZD1	ENSG00000157240	frizzled class receptor 1 [Source:HGNC Symbol;Acc:HGNC:4038]
985	ENSBTAG00000002108	ENSBTAG00000002108	985.1.1	YWHAQ	ENSG00000134308	tyrosine 3-monooxygenase/tryptophan 5-monooxygenase activation protein theta [Source:HGNC Symbol;Acc:HGNC:12854]
986	ENSBTAG00000002110	ENSBTAG00000002110	986.1.1	DMGDH	ENSG00000132837	dimethylglycine dehydrogenase [Source:HGNC Symbol;Acc:HGNC:24475]
987	ENSBTAG00000002112	ENSBTAG00000002112	987.1.1	INSIG2	ENSG00000125629	insulin induced gene 2 [Source:HGNC Symbol;Acc:HGNC:20452]
988	ENSBTAG00000002116	ENSBTAG00000002116	988.1.1	ZCCHC3	ENSG00000247315	zinc finger CCHC-type containing 3 [Source:HGNC Symbol;Acc:HGNC:16230]
989	ENSBTAG00000002117	ENSBTAG00000002117	989.1.1	KIF18A	ENSG00000121621	kinesin family member 18A [Source:HGNC Symbol;Acc:HGNC:29441]
990	ENSBTAG00000002121	ENSBTAG00000002121	990.1.1	CDK2AP2	ENSG00000167797	cyclin dependent kinase 2 associated protein 2 [Source:HGNC Symbol;Acc:HGNC:30833]
991	ENSBTAG00000002123	ENSBTAG00000002123	991.1.1	MYO3A	ENSG00000095777	myosin IIIA [Source:HGNC Symbol;Acc:HGNC:7601]
992	ENSBTAG00000002125	ENSBTAG00000002125	992.1.1	GNAL	ENSG00000141404	G protein subunit alpha L [Source:HGNC Symbol;Acc:HGNC:4388]
993	ENSBTAG00000002126	ENSBTAG00000002126	993.1.1	PFKFB2	ENSG00000123836	6-phosphofructo-2-kinase/fructose-2,6-biphosphatase 2 [Source:HGNC Symbol;Acc:HGNC:8873]
994	ENSBTAG00000002127	ENSBTAG00000002127	994.1.1	TCP11L2	ENSG00000166046	t-complex 11 like 2 [Source:HGNC Symbol;Acc:HGNC:28627]
995	ENSBTAG00000002128	ENSBTAG00000002128	995.1.1	MPPE1	ENSG00000154889	metallophosphoesterase 1 [Source:HGNC Symbol;Acc:HGNC:15988]
996	ENSBTAG00000002129	ENSBTAG00000002129	996.1.1	KLF5	ENSG00000102554	KLF transcription factor 5 [Source:HGNC Symbol;Acc:HGNC:6349]
997	ENSBTAG00000002130	ENSBTAG00000002130	997.1.1	SMPD4	ENSG00000136699	sphingomyelin phosphodiesterase 4 [Source:HGNC Symbol;Acc:HGNC:32949]
998	ENSBTAG00000002135	ENSBTAG00000002135	998.1.1	CD69	ENSG00000110848	CD69 molecule [Source:HGNC Symbol;Acc:HGNC:1694]
999	ENSBTAG00000002136	ENSBTAG00000002136	999.1.1	FCHO1	ENSG00000130475	FCH and mu domain containing endocytic adaptor 1 [Source:HGNC Symbol;Acc:HGNC:29002]
1000	ENSBTAG00000002137	ENSBTAG00000002137	1000.1.1	SUGT1	ENSG00000165416	SGT1 homolog, MIS12 kinetochore complex assembly cochaperone [Source:HGNC Symbol;Acc:HGNC:16987]
1001	ENSBTAG00000002143	ENSBTAG00000002143	1001.1.1	DTWD2	ENSG00000169570	DTW domain containing 2 [Source:HGNC Symbol;Acc:HGNC:19334]
1002	ENSBTAG00000002144	ENSBTAG00000002144	1002.1.1	ADRB2	ENSG00000169252	adrenoceptor beta 2 [Source:HGNC Symbol;Acc:HGNC:286]
1003	ENSBTAG00000002147	ENSBTAG00000002147	1003.1.1	PPP4R2	ENSG00000163605	protein phosphatase 4 regulatory subunit 2 [Source:HGNC Symbol;Acc:HGNC:18296]
1005	ENSBTAG00000002163	ENSBTAG00000002163	1005.1.1	PTGER2	ENSG00000125384	prostaglandin E receptor 2 [Source:HGNC Symbol;Acc:HGNC:9594]
1006	ENSBTAG00000002170	ENSBTAG00000002170	1006.1.1	NOVA1	ENSG00000139910	NOVA alternative splicing regulator 1 [Source:HGNC Symbol;Acc:HGNC:7886]
1007	ENSBTAG00000002171	ENSBTAG00000002171	1007.1.1	FAM135A	ENSG00000082269	family with sequence similarity 135 member A [Source:HGNC Symbol;Acc:HGNC:21084]
1008	ENSBTAG00000002174	ENSBTAG00000002174	1008.1.1	RERG	ENSG00000134533	RAS like estrogen regulated growth inhibitor [Source:HGNC Symbol;Acc:HGNC:15980]
1009	ENSBTAG00000002175	ENSBTAG00000002175	1009.1.1	SRPK2	ENSG00000135250	SRSF protein kinase 2 [Source:HGNC Symbol;Acc:HGNC:11306]
1010	ENSBTAG00000002176	ENSBTAG00000002176	1010.1.1	NSMCE1	ENSG00000169189	NSE1 homolog, SMC5-SMC6 complex component [Source:HGNC Symbol;Acc:HGNC:29897]
1011	ENSBTAG00000002177	ENSBTAG00000002177	1011.1.1	PIKFYVE	ENSG00000115020	phosphoinositide kinase, FYVE-type zinc finger containing [Source:HGNC Symbol;Acc:HGNC:23785]
1012	ENSBTAG00000002178	ENSBTAG00000002178	1012.1.1	PPL	ENSG00000118898	periplakin [Source:HGNC Symbol;Acc:HGNC:9273]
1013	ENSBTAG00000002181	ENSBTAG00000002181	1013.1.1	KHDRBS3	ENSG00000131773	KH RNA binding domain containing, signal transduction associated 3 [Source:HGNC Symbol;Acc:HGNC:18117]
1015	ENSBTAG00000002185	ENSBTAG00000002185	1015.1.1	RNF7	ENSG00000114125	ring finger protein 7 [Source:HGNC Symbol;Acc:HGNC:10070]
1016	ENSBTAG00000002186	ENSBTAG00000002186	1016.1.1	NDN	ENSG00000182636	necdin, MAGE family member [Source:HGNC Symbol;Acc:HGNC:7675]
1017	ENSBTAG00000002187	ENSBTAG00000002187	1017.1.1	SERINC3	ENSG00000132824	serine incorporator 3 [Source:HGNC Symbol;Acc:HGNC:11699]
1018	ENSBTAG00000002188	ENSBTAG00000002188	1018.1.1	C16orf89	ENSG00000153446	chromosome 16 open reading frame 89 [Source:HGNC Symbol;Acc:HGNC:28687]
1019	ENSBTAG00000002189	ENSBTAG00000002189	1019.1.1	ALG1	ENSG00000033011	ALG1 chitobiosyldiphosphodolichol beta-mannosyltransferase [Source:HGNC Symbol;Acc:HGNC:18294]
1019	ENSBTAG00000002189	ENSBTAG00000002189	1019.1.2	ALG1L2	ENSG00000251287	ALG1 chitobiosyldiphosphodolichol beta-mannosyltransferase like 2 [Source:HGNC Symbol;Acc:HGNC:37258]
1020	ENSBTAG00000002190	ENSBTAG00000002190	1020.1.1	DOCK8	ENSG00000107099	dedicator of cytokinesis 8 [Source:HGNC Symbol;Acc:HGNC:19191]
1021	ENSBTAG00000002191	ENSBTAG00000002191	1021.1.1	RRP12	ENSG00000052749	ribosomal RNA processing 12 homolog [Source:HGNC Symbol;Acc:HGNC:29100]
1022	ENSBTAG00000002194	ENSBTAG00000002194	1022.1.1	MYZAP	ENSG00000263155	myocardial zonula adherens protein [Source:HGNC Symbol;Acc:HGNC:43444]
1023	ENSBTAG00000002201	ENSBTAG00000002201	1023.1.1	NFXL1	ENSG00000170448	nuclear transcription factor, X-box binding like 1 [Source:HGNC Symbol;Acc:HGNC:18726]
1024	ENSBTAG00000002202	ENSBTAG00000002202	1024.1.1	CRAMP1	ENSG00000007545	cramped chromatin regulator homolog 1 [Source:HGNC Symbol;Acc:HGNC:14122]
1025	ENSBTAG00000002203	ENSBTAG00000002203	1025.1.1	NDUFS2	ENSG00000158864	NADH:ubiquinone oxidoreductase core subunit S2 [Source:HGNC Symbol;Acc:HGNC:7708]
1026	ENSBTAG00000002205	ENSBTAG00000002205	1026.1.1	CNGA1	ENSG00000198515	cyclic nucleotide gated channel subunit alpha 1 [Source:HGNC Symbol;Acc:HGNC:2148]
1027	ENSBTAG00000002209	ENSBTAG00000002209	1027.1.1	JPT2	ENSG00000206053	Jupiter microtubule associated homolog 2 [Source:HGNC Symbol;Acc:HGNC:14137]
1028	ENSBTAG00000002211	ENSBTAG00000002211	1028.1.1	MAPK8IP3	ENSG00000138834	mitogen-activated protein kinase 8 interacting protein 3 [Source:HGNC Symbol;Acc:HGNC:6884]
1029	ENSBTAG00000002214	ENSBTAG00000002214	1029.1.1	TAT	ENSG00000198650	tyrosine aminotransferase [Source:HGNC Symbol;Acc:HGNC:11573]
1030	ENSBTAG00000002215	ENSBTAG00000002215	1030.1.1	GFPT2	ENSG00000131459	glutamine-fructose-6-phosphate transaminase 2 [Source:HGNC Symbol;Acc:HGNC:4242]
1031	ENSBTAG00000002219	ENSBTAG00000002219	1031.1.1	ATAD3A	ENSG00000197785	ATPase family AAA domain containing 3A [Source:HGNC Symbol;Acc:HGNC:25567]
1032	ENSBTAG00000002220	ENSBTAG00000002220	1032.1.1	SPTLC1	ENSG00000090054	serine palmitoyltransferase long chain base subunit 1 [Source:HGNC Symbol;Acc:HGNC:11277]
1033	ENSBTAG00000002223	ENSBTAG00000002223	1033.1.1	POP4	ENSG00000105171	POP4 homolog, ribonuclease P/MRP subunit [Source:HGNC Symbol;Acc:HGNC:30081]
1034	ENSBTAG00000002224	ENSBTAG00000002224	1034.1.1	UHRF1	ENSG00000276043	ubiquitin like with PHD and ring finger domains 1 [Source:HGNC Symbol;Acc:HGNC:12556]
1035	ENSBTAG00000002226	ENSBTAG00000002226	1035.1.1	FBXO31	ENSG00000103264	F-box protein 31 [Source:HGNC Symbol;Acc:HGNC:16510]
1036	ENSBTAG00000002227	ENSBTAG00000002227	1036.1.1	LRIG3	ENSG00000139263	leucine rich repeats and immunoglobulin like domains 3 [Source:HGNC Symbol;Acc:HGNC:30991]
1037	ENSBTAG00000002232	ENSBTAG00000002232	1037.1.1	TRPC1	ENSG00000144935	transient receptor potential cation channel subfamily C member 1 [Source:HGNC Symbol;Acc:HGNC:12333]
1038	ENSBTAG00000002233	ENSBTAG00000002233	1038.1.1	CPNE2	ENSG00000140848	copine 2 [Source:HGNC Symbol;Acc:HGNC:2315]
1039	ENSBTAG00000002236	ENSBTAG00000002236	1039.1.1	TRPC4AP	ENSG00000100991	transient receptor potential cation channel subfamily C member 4 associated protein [Source:HGNC Symbol;Acc:HGNC:16181]
1040	ENSBTAG00000002238	ENSBTAG00000002238	1040.1.1	ARL2	ENSG00000213465	ADP ribosylation factor like GTPase 2 [Source:HGNC Symbol;Acc:HGNC:693]
1041	ENSBTAG00000002240	ENSBTAG00000002240	1041.1.1	GPR18	ENSG00000125245	G protein-coupled receptor 18 [Source:HGNC Symbol;Acc:HGNC:4472]
1042	ENSBTAG00000002243	ENSBTAG00000002243	1042.1.1	SNX15	ENSG00000110025	sorting nexin 15 [Source:HGNC Symbol;Acc:HGNC:14978]
1043	ENSBTAG00000002249	ENSBTAG00000002249	1043.1.1	NAALADL1	ENSG00000168060	N-acetylated alpha-linked acidic dipeptidase like 1 [Source:HGNC Symbol;Acc:HGNC:23536]
1044	ENSBTAG00000002256	ENSBTAG00000002256	1044.1.1	YEATS4	ENSG00000127337	YEATS domain containing 4 [Source:HGNC Symbol;Acc:HGNC:24859]
1045	ENSBTAG00000002257	ENSBTAG00000002257	1045.1.1	KLK11	ENSG00000167757	kallikrein related peptidase 11 [Source:HGNC Symbol;Acc:HGNC:6359]
1047	ENSBTAG00000002260	ENSBTAG00000002260	1047.1.1	NCAPD3	ENSG00000151503	non-SMC condensin II complex subunit D3 [Source:HGNC Symbol;Acc:HGNC:28952]
1048	ENSBTAG00000002266	ENSBTAG00000002266	1048.1.1	NPL	ENSG00000135838	N-acetylneuraminate pyruvate lyase [Source:HGNC Symbol;Acc:HGNC:16781]
1049	ENSBTAG00000002267	ENSBTAG00000002267	1049.1.1	ANKRD40	ENSG00000154945	ankyrin repeat domain 40 [Source:HGNC Symbol;Acc:HGNC:28233]
1050	ENSBTAG00000002271	ENSBTAG00000002271	1050.1.1	CDADC1	ENSG00000102543	cytidine and dCMP deaminase domain containing 1 [Source:HGNC Symbol;Acc:HGNC:20299]
1051	ENSBTAG00000002272	ENSBTAG00000002272	1051.1.1	KCTD18	ENSG00000155729	potassium channel tetramerization domain containing 18 [Source:HGNC Symbol;Acc:HGNC:26446]
1052	ENSBTAG00000002275	ENSBTAG00000002275	1052.1.1	PTP4A1	ENSG00000112245	protein tyrosine phosphatase 4A1 [Source:HGNC Symbol;Acc:HGNC:9634]
1053	ENSBTAG00000002277	ENSBTAG00000002277	1053.1.1	MLLT1	ENSG00000130382	MLLT1 super elongation complex subunit [Source:HGNC Symbol;Acc:HGNC:7134]
1054	ENSBTAG00000002278	ENSBTAG00000002278	1054.1.1	FBN1	ENSG00000166147	fibrillin 1 [Source:HGNC Symbol;Acc:HGNC:3603]
1055	ENSBTAG00000002279	ENSBTAG00000002279	1055.1.1	LUC7L3	ENSG00000108848	LUC7 like 3 pre-mRNA splicing factor [Source:HGNC Symbol;Acc:HGNC:24309]
1056	ENSBTAG00000002280	ENSBTAG00000002280	1056.1.1	KIF5B	ENSG00000170759	kinesin family member 5B [Source:HGNC Symbol;Acc:HGNC:6324]
1057	ENSBTAG00000002281	ENSBTAG00000002281	1057.1.1	ZNF354C	ENSG00000177932	zinc finger protein 354C [Source:HGNC Symbol;Acc:HGNC:16736]
1058	ENSBTAG00000002282	ENSBTAG00000002282	1058.1.1	EIF1	ENSG00000173812	eukaryotic translation initiation factor 1 [Source:HGNC Symbol;Acc:HGNC:3249]
1059	ENSBTAG00000002283	ENSBTAG00000002283	1059.1.1	FZD7	ENSG00000155760	frizzled class receptor 7 [Source:HGNC Symbol;Acc:HGNC:4045]
1060	ENSBTAG00000002286	ENSBTAG00000002286	1060.1.1	DNAJC18	ENSG00000170464	DnaJ heat shock protein family (Hsp40) member C18 [Source:HGNC Symbol;Acc:HGNC:28429]
1061	ENSBTAG00000002287	ENSBTAG00000002287	1061.1.1	CHD9	ENSG00000177200	chromodomain helicase DNA binding protein 9 [Source:HGNC Symbol;Acc:HGNC:25701]
1062	ENSBTAG00000002291	ENSBTAG00000002291	1062.1.1	ZBTB41	ENSG00000177888	zinc finger and BTB domain containing 41 [Source:HGNC Symbol;Acc:HGNC:24819]
1063	ENSBTAG00000002293	ENSBTAG00000002293	1063.1.1	ARL5A	ENSG00000162980	ADP ribosylation factor like GTPase 5A [Source:HGNC Symbol;Acc:HGNC:696]
1064	ENSBTAG00000002295	ENSBTAG00000002295	1064.1.1	ATF2	ENSG00000115966	activating transcription factor 2 [Source:HGNC Symbol;Acc:HGNC:784]
1066	ENSBTAG00000002299	ENSBTAG00000002299	1066.1.1	SEL1L3	ENSG00000091490	SEL1L family member 3 [Source:HGNC Symbol;Acc:HGNC:29108]
1067	ENSBTAG00000002302	ENSBTAG00000002302	1067.1.1	CD59	ENSG00000085063	CD59 molecule (CD59 blood group) [Source:HGNC Symbol;Acc:HGNC:1689]
1068	ENSBTAG00000002303	ENSBTAG00000002303	1068.1.1	GLG1	ENSG00000090863	golgi glycoprotein 1 [Source:HGNC Symbol;Acc:HGNC:4316]
1069	ENSBTAG00000002305	ENSBTAG00000002305	1069.1.1	PCSK4	ENSG00000115257	proprotein convertase subtilisin/kexin type 4 [Source:HGNC Symbol;Acc:HGNC:8746]
1070	ENSBTAG00000002306	ENSBTAG00000002306	1070.1.1	UTP11	ENSG00000183520	UTP11 small subunit processome component [Source:HGNC Symbol;Acc:HGNC:24329]
1071	ENSBTAG00000002311	ENSBTAG00000002311	1071.1.1	REEP6	ENSG00000115255	receptor accessory protein 6 [Source:HGNC Symbol;Acc:HGNC:30078]
1072	ENSBTAG00000002313	ENSBTAG00000002313	1072.1.1	ITPR2	ENSG00000123104	inositol 1,4,5-trisphosphate receptor type 2 [Source:HGNC Symbol;Acc:HGNC:6181]
1073	ENSBTAG00000002315	ENSBTAG00000002315	1073.1.1	RNF34	ENSG00000170633	ring finger protein 34 [Source:HGNC Symbol;Acc:HGNC:17297]
1075	ENSBTAG00000002317	ENSBTAG00000002317	1075.1.1	PTN	ENSG00000105894	pleiotrophin [Source:HGNC Symbol;Acc:HGNC:9630]
1076	ENSBTAG00000002319	ENSBTAG00000002319	1076.1.1	HMCN2	ENSG00000148357	hemicentin 2 [Source:HGNC Symbol;Acc:HGNC:21293]
1077	ENSBTAG00000002321	ENSBTAG00000002321	1077.1.1	AMT	ENSG00000145020	aminomethyltransferase [Source:HGNC Symbol;Acc:HGNC:473]
1078	ENSBTAG00000002323	ENSBTAG00000002323	1078.1.1	USP28	ENSG00000048028	ubiquitin specific peptidase 28 [Source:HGNC Symbol;Acc:HGNC:12625]
1079	ENSBTAG00000002326	ENSBTAG00000002326	1079.1.1	LGALS3	ENSG00000131981	galectin 3 [Source:HGNC Symbol;Acc:HGNC:6563]
1080	ENSBTAG00000002327	ENSBTAG00000002327	1080.1.1	TMEM208	ENSG00000168701	transmembrane protein 208 [Source:HGNC Symbol;Acc:HGNC:25015]
1081	ENSBTAG00000002328	ENSBTAG00000002328	1081.1.1	KDM2B	ENSG00000089094	lysine demethylase 2B [Source:HGNC Symbol;Acc:HGNC:13610]
1082	ENSBTAG00000002329	ENSBTAG00000002329	1082.1.1	ASAP2	ENSG00000151693	ArfGAP with SH3 domain, ankyrin repeat and PH domain 2 [Source:HGNC Symbol;Acc:HGNC:2721]
1083	ENSBTAG00000002331	ENSBTAG00000002331	1083.1.1	DLGAP5	ENSG00000126787	DLG associated protein 5 [Source:HGNC Symbol;Acc:HGNC:16864]
1084	ENSBTAG00000002332	ENSBTAG00000002332	1084.1.1	LSM5	ENSG00000106355	LSM5 homolog, U6 small nuclear RNA and mRNA degradation associated [Source:HGNC Symbol;Acc:HGNC:17162]
1085	ENSBTAG00000002333	ENSBTAG00000002333	1085.1.1	HOPX	ENSG00000171476	HOP homeobox [Source:HGNC Symbol;Acc:HGNC:24961]
1086	ENSBTAG00000002336	ENSBTAG00000002336	1086.1.1	RCOR1	ENSG00000089902	REST corepressor 1 [Source:HGNC Symbol;Acc:HGNC:17441]
1087	ENSBTAG00000002340	ENSBTAG00000002340	1087.1.1	STEAP4	ENSG00000127954	STEAP4 metalloreductase [Source:HGNC Symbol;Acc:HGNC:21923]
1088	ENSBTAG00000002341	ENSBTAG00000002341	1088.1.1	ETS1	ENSG00000134954	ETS proto-oncogene 1, transcription factor [Source:HGNC Symbol;Acc:HGNC:3488]
1089	ENSBTAG00000002344	ENSBTAG00000002344	1089.1.1	ORAI3	ENSG00000175938	ORAI calcium release-activated calcium modulator 3 [Source:HGNC Symbol;Acc:HGNC:28185]
1090	ENSBTAG00000002345	ENSBTAG00000002345	1090.1.1	SETD1A	ENSG00000099381	SET domain containing 1A, histone lysine methyltransferase [Source:HGNC Symbol;Acc:HGNC:29010]
1091	ENSBTAG00000002346	ENSBTAG00000002346	1091.1.1	HSD3B7	ENSG00000099377	hydroxy-delta-5-steroid dehydrogenase, 3 beta- and steroid delta-isomerase 7 [Source:HGNC Symbol;Acc:HGNC:18324]
1092	ENSBTAG00000002347	ENSBTAG00000002347	1092.1.1	MAST3	ENSG00000099308	microtubule associated serine/threonine kinase 3 [Source:HGNC Symbol;Acc:HGNC:19036]
1093	ENSBTAG00000002348	ENSBTAG00000002348	1093.1.1	SLC4A4	ENSG00000080493	solute carrier family 4 member 4 [Source:HGNC Symbol;Acc:HGNC:11030]
1094	ENSBTAG00000002349	ENSBTAG00000002349	1094.1.1	STX1B	ENSG00000099365	syntaxin 1B [Source:HGNC Symbol;Acc:HGNC:18539]
1095	ENSBTAG00000002350	ENSBTAG00000002350	1095.1.1	PIK3R2	ENSG00000105647	phosphoinositide-3-kinase regulatory subunit 2 [Source:HGNC Symbol;Acc:HGNC:8980]
1096	ENSBTAG00000002352	ENSBTAG00000002352	1096.1.1	GGA2	ENSG00000103365	golgi associated, gamma adaptin ear containing, ARF binding protein 2 [Source:HGNC Symbol;Acc:HGNC:16064]
1097	ENSBTAG00000002356	ENSBTAG00000002356	1097.1.1	RBM47	ENSG00000163694	RNA binding motif protein 47 [Source:HGNC Symbol;Acc:HGNC:30358]
1099	ENSBTAG00000002362	ENSBTAG00000002362	1099.1.1	APOLD1	ENSG00000178878	apolipoprotein L domain containing 1 [Source:HGNC Symbol;Acc:HGNC:25268]
1100	ENSBTAG00000002363	ENSBTAG00000002363	1100.1.1	SESN2	ENSG00000130766	sestrin 2 [Source:HGNC Symbol;Acc:HGNC:20746]
1101	ENSBTAG00000002367	ENSBTAG00000002367	1101.1.1	HCFC1R1	ENSG00000103145	host cell factor C1 regulator 1 [Source:HGNC Symbol;Acc:HGNC:21198]
1102	ENSBTAG00000002368	ENSBTAG00000002368	1102.1.1	TULP2	ENSG00000104804	TUB like protein 2 [Source:HGNC Symbol;Acc:HGNC:12424]
1103	ENSBTAG00000002370	ENSBTAG00000002370	1103.1.1	ZNF792	ENSG00000180884	zinc finger protein 792 [Source:HGNC Symbol;Acc:HGNC:24751]
1104	ENSBTAG00000002374	ENSBTAG00000002374	1104.1.1	ARMC5	ENSG00000140691	armadillo repeat containing 5 [Source:HGNC Symbol;Acc:HGNC:25781]
1106	ENSBTAG00000002377	ENSBTAG00000002377	1106.1.1	PSMB2	ENSG00000126067	proteasome 20S subunit beta 2 [Source:HGNC Symbol;Acc:HGNC:9539]
1107	ENSBTAG00000002378	ENSBTAG00000002378	1107.1.1	NUCB1	ENSG00000104805	nucleobindin 1 [Source:HGNC Symbol;Acc:HGNC:8043]
1108	ENSBTAG00000002381	ENSBTAG00000002381	1108.1.1	ZDHHC5	ENSG00000156599	zinc finger DHHC-type palmitoyltransferase 5 [Source:HGNC Symbol;Acc:HGNC:18472]
1109	ENSBTAG00000002382	ENSBTAG00000002382	1109.1.1	DDX10	ENSG00000178105	DEAD-box helicase 10 [Source:HGNC Symbol;Acc:HGNC:2735]
1110	ENSBTAG00000002389	ENSBTAG00000002389	1110.1.1	MED19	ENSG00000156603	mediator complex subunit 19 [Source:HGNC Symbol;Acc:HGNC:29600]
1111	ENSBTAG00000002390	ENSBTAG00000002390	1111.1.1	CCDC184	ENSG00000177875	coiled-coil domain containing 184 [Source:HGNC Symbol;Acc:HGNC:33749]
1112	ENSBTAG00000002391	ENSBTAG00000002391	1112.1.1	TGFB1I1	ENSG00000140682	transforming growth factor beta 1 induced transcript 1 [Source:HGNC Symbol;Acc:HGNC:11767]
1113	ENSBTAG00000002393	ENSBTAG00000002393	1113.1.1	C6orf89	ENSG00000198663	chromosome 6 open reading frame 89 [Source:HGNC Symbol;Acc:HGNC:21114]
1114	ENSBTAG00000002394	ENSBTAG00000002394	1114.1.1	TMEM44	ENSG00000145014	transmembrane protein 44 [Source:HGNC Symbol;Acc:HGNC:25120]
1115	ENSBTAG00000002395	ENSBTAG00000002395	1115.1.1	HPS3	ENSG00000163755	HPS3 biogenesis of lysosomal organelles complex 2 subunit 1 [Source:HGNC Symbol;Acc:HGNC:15597]
1116	ENSBTAG00000002398	ENSBTAG00000002398	1116.1.1	ZNF567	ENSG00000189042	zinc finger protein 567 [Source:HGNC Symbol;Acc:HGNC:28696]
1117	ENSBTAG00000002402	ENSBTAG00000002402	1117.1.1	IGF2R	ENSG00000197081	insulin like growth factor 2 receptor [Source:HGNC Symbol;Acc:HGNC:5467]
1118	ENSBTAG00000002404	ENSBTAG00000002404	1118.1.1	TMX2	ENSG00000213593	thioredoxin related transmembrane protein 2 [Source:HGNC Symbol;Acc:HGNC:30739]
1119	ENSBTAG00000002408	ENSBTAG00000002408	1119.1.1	FHAD1	ENSG00000142621	forkhead associated phosphopeptide binding domain 1 [Source:HGNC Symbol;Acc:HGNC:29408]
1120	ENSBTAG00000002411	ENSBTAG00000002411	1120.1.1	CTNND1	ENSG00000198561	catenin delta 1 [Source:HGNC Symbol;Acc:HGNC:2515]
1121	ENSBTAG00000002412	ENSBTAG00000002412	1121.1.1	CYB5B	ENSG00000103018	cytochrome b5 type B [Source:HGNC Symbol;Acc:HGNC:24374]
1122	ENSBTAG00000002413	ENSBTAG00000002413	1122.1.1	MCAT	ENSG00000100294	malonyl-CoA-acyl carrier protein transacylase [Source:HGNC Symbol;Acc:HGNC:29622]
1123	ENSBTAG00000002414	ENSBTAG00000002414	1123.1.1	KCNJ10	ENSG00000177807	potassium inwardly rectifying channel subfamily J member 10 [Source:HGNC Symbol;Acc:HGNC:6256]
1124	ENSBTAG00000002415	ENSBTAG00000002415	1124.1.1	TSPAN3	ENSG00000140391	tetraspanin 3 [Source:HGNC Symbol;Acc:HGNC:17752]
1125	ENSBTAG00000002417	ENSBTAG00000002417	1125.1.1	RAB30	ENSG00000137502	RAB30, member RAS oncogene family [Source:HGNC Symbol;Acc:HGNC:9770]
1126	ENSBTAG00000002418	ENSBTAG00000002418	1126.1.1	TICRR	ENSG00000140534	TOPBP1 interacting checkpoint and replication regulator [Source:HGNC Symbol;Acc:HGNC:28704]
1127	ENSBTAG00000002419	ENSBTAG00000002419	1127.1.1	PIGM	ENSG00000143315	phosphatidylinositol glycan anchor biosynthesis class M [Source:HGNC Symbol;Acc:HGNC:18858]
1128	ENSBTAG00000002422	ENSBTAG00000002422	1128.1.1	BCL9	ENSG00000116128	BCL9 transcription coactivator [Source:HGNC Symbol;Acc:HGNC:1008]
1129	ENSBTAG00000002423	ENSBTAG00000002423	1129.1.1	PSMD12	ENSG00000197170	proteasome 26S subunit, non-ATPase 12 [Source:HGNC Symbol;Acc:HGNC:9557]
1130	ENSBTAG00000002425	ENSBTAG00000002425	1130.1.1	SCN9A	ENSG00000169432	sodium voltage-gated channel alpha subunit 9 [Source:HGNC Symbol;Acc:HGNC:10597]
1131	ENSBTAG00000002428	ENSBTAG00000002428	1131.1.1	PPA2	ENSG00000138777	inorganic pyrophosphatase 2 [Source:HGNC Symbol;Acc:HGNC:28883]
1132	ENSBTAG00000002430	ENSBTAG00000002430	1132.1.1	COL17A1	ENSG00000065618	collagen type XVII alpha 1 chain [Source:HGNC Symbol;Acc:HGNC:2194]
1133	ENSBTAG00000002431	ENSBTAG00000002431	1133.1.1	TRIM24	ENSG00000122779	tripartite motif containing 24 [Source:HGNC Symbol;Acc:HGNC:11812]
1135	ENSBTAG00000002434	ENSBTAG00000002434	1135.1.1	WDR18	ENSG00000065268	WD repeat domain 18 [Source:HGNC Symbol;Acc:HGNC:17956]
1136	ENSBTAG00000002435	ENSBTAG00000002435	1136.1.1	PTPRE	ENSG00000132334	protein tyrosine phosphatase receptor type E [Source:HGNC Symbol;Acc:HGNC:9669]
1137	ENSBTAG00000002440	ENSBTAG00000002440	1137.1.1	KIF7	ENSG00000166813	kinesin family member 7 [Source:HGNC Symbol;Acc:HGNC:30497]
1138	ENSBTAG00000002444	ENSBTAG00000002444	1138.1.1	MKI67	ENSG00000148773	marker of proliferation Ki-67 [Source:HGNC Symbol;Acc:HGNC:7107]
1139	ENSBTAG00000002447	ENSBTAG00000002447	1139.1.1	C19orf44	ENSG00000105072	chromosome 19 open reading frame 44 [Source:HGNC Symbol;Acc:HGNC:26141]
1140	ENSBTAG00000002451	ENSBTAG00000002451	1140.1.1	TTC39A	ENSG00000085831	tetratricopeptide repeat domain 39A [Source:HGNC Symbol;Acc:HGNC:18657]
1141	ENSBTAG00000002452	ENSBTAG00000002452	1141.1.1	ASCC2	ENSG00000100325	activating signal cointegrator 1 complex subunit 2 [Source:HGNC Symbol;Acc:HGNC:24103]
1142	ENSBTAG00000002454	ENSBTAG00000002454	1142.1.1	ALG2	ENSG00000119523	ALG2 alpha-1,3/1,6-mannosyltransferase [Source:HGNC Symbol;Acc:HGNC:23159]
1143	ENSBTAG00000002455	ENSBTAG00000002455	1143.1.1	KLHL8	ENSG00000145332	kelch like family member 8 [Source:HGNC Symbol;Acc:HGNC:18644]
1144	ENSBTAG00000002457	ENSBTAG00000002457	1144.1.1	SEC61B	ENSG00000106803	SEC61 translocon subunit beta [Source:HGNC Symbol;Acc:HGNC:16993]
1145	ENSBTAG00000002458	ENSBTAG00000002458	1145.1.1	NUP155	ENSG00000113569	nucleoporin 155 [Source:HGNC Symbol;Acc:HGNC:8063]
1146	ENSBTAG00000002460	ENSBTAG00000002460	1146.1.1	ACTL6A	ENSG00000136518	actin like 6A [Source:HGNC Symbol;Acc:HGNC:24124]
1147	ENSBTAG00000002462	ENSBTAG00000002462	1147.1.1	MRPL47	ENSG00000136522	mitochondrial ribosomal protein L47 [Source:HGNC Symbol;Acc:HGNC:16652]
1148	ENSBTAG00000002463	ENSBTAG00000002463	1148.1.1	NDUFB5	ENSG00000136521	NADH:ubiquinone oxidoreductase subunit B5 [Source:HGNC Symbol;Acc:HGNC:7700]
1149	ENSBTAG00000002464	ENSBTAG00000002464	1149.1.1	PLCH2	ENSG00000149527	phospholipase C eta 2 [Source:HGNC Symbol;Acc:HGNC:29037]
1150	ENSBTAG00000002468	ENSBTAG00000002468	1150.1.1	RPS28	ENSG00000233927	ribosomal protein S28 [Source:HGNC Symbol;Acc:HGNC:10418]
1151	ENSBTAG00000002469	ENSBTAG00000002469	1151.1.1	KANK3	ENSG00000186994	KN motif and ankyrin repeat domains 3 [Source:HGNC Symbol;Acc:HGNC:24796]
1152	ENSBTAG00000002470	ENSBTAG00000002470	1152.1.1	CCDC78	ENSG00000162004	coiled-coil domain containing 78 [Source:HGNC Symbol;Acc:HGNC:14153]
1153	ENSBTAG00000002471	ENSBTAG00000002471	1153.1.1	CHL1	ENSG00000134121	cell adhesion molecule L1 like [Source:HGNC Symbol;Acc:HGNC:1939]
1154	ENSBTAG00000002472	ENSBTAG00000002472	1154.1.1	CASP9	ENSG00000132906	caspase 9 [Source:HGNC Symbol;Acc:HGNC:1511]
1155	ENSBTAG00000002473	ENSBTAG00000002473	1155.1.1	ANGPTL4	ENSG00000167772	angiopoietin like 4 [Source:HGNC Symbol;Acc:HGNC:16039]
1156	ENSBTAG00000002474	ENSBTAG00000002474	1156.1.1	MAD1L1	ENSG00000002822	mitotic arrest deficient 1 like 1 [Source:HGNC Symbol;Acc:HGNC:6762]
1157	ENSBTAG00000002475	ENSBTAG00000002475	1157.1.1	RAB11B	ENSG00000185236	RAB11B, member RAS oncogene family [Source:HGNC Symbol;Acc:HGNC:9761]
1158	ENSBTAG00000002476	ENSBTAG00000002476	1158.1.1	DNAJC16	ENSG00000116138	DnaJ heat shock protein family (Hsp40) member C16 [Source:HGNC Symbol;Acc:HGNC:29157]
1159	ENSBTAG00000002477	ENSBTAG00000002477	1159.1.1	MRM2	ENSG00000122687	mitochondrial rRNA methyltransferase 2 [Source:HGNC Symbol;Acc:HGNC:16352]
1160	ENSBTAG00000002479	ENSBTAG00000002479	1160.1.1	PANK4	ENSG00000157881	pantothenate kinase 4 (inactive) [Source:HGNC Symbol;Acc:HGNC:19366]
1161	ENSBTAG00000002480	ENSBTAG00000002480	1161.1.1	NUDT1	ENSG00000106268	nudix hydrolase 1 [Source:HGNC Symbol;Acc:HGNC:8048]
1162	ENSBTAG00000002481	ENSBTAG00000002481	1162.1.1	HAGHL	ENSG00000103253	hydroxyacylglutathione hydrolase like [Source:HGNC Symbol;Acc:HGNC:14177]
1163	ENSBTAG00000002485	ENSBTAG00000002485	1163.1.1	TNS1	ENSG00000079308	tensin 1 [Source:HGNC Symbol;Acc:HGNC:11973]
1164	ENSBTAG00000002487	ENSBTAG00000002487	1164.1.1	UBE3A	ENSG00000114062	ubiquitin protein ligase E3A [Source:HGNC Symbol;Acc:HGNC:12496]
1165	ENSBTAG00000002490	ENSBTAG00000002490	1165.1.1	CHPT1	ENSG00000111666	choline phosphotransferase 1 [Source:HGNC Symbol;Acc:HGNC:17852]
1166	ENSBTAG00000002492	ENSBTAG00000002492	1166.1.1	SYCP3	ENSG00000139351	synaptonemal complex protein 3 [Source:HGNC Symbol;Acc:HGNC:18130]
1167	ENSBTAG00000002493	ENSBTAG00000002493	1167.1.1	VPS35	ENSG00000069329	VPS35 retromer complex component [Source:HGNC Symbol;Acc:HGNC:13487]
1169	ENSBTAG00000002500	ENSBTAG00000002500	1169.1.1	FBXL15	ENSG00000107872	F-box and leucine rich repeat protein 15 [Source:HGNC Symbol;Acc:HGNC:28155]
1170	ENSBTAG00000002501	ENSBTAG00000002501	1170.1.1	CUEDC2	ENSG00000107874	CUE domain containing 2 [Source:HGNC Symbol;Acc:HGNC:28352]
1171	ENSBTAG00000002503	ENSBTAG00000002503	1171.1.1	BSCL2	ENSG00000168000	BSCL2 lipid droplet biogenesis associated, seipin [Source:HGNC Symbol;Acc:HGNC:15832]
1172	ENSBTAG00000002504	ENSBTAG00000002504	1172.1.1	IREB2	ENSG00000136381	iron responsive element binding protein 2 [Source:HGNC Symbol;Acc:HGNC:6115]
1173	ENSBTAG00000002507	ENSBTAG00000002507	1173.1.1	ATP5F1A	ENSG00000152234	ATP synthase F1 subunit alpha [Source:HGNC Symbol;Acc:HGNC:823]
1174	ENSBTAG00000002508	ENSBTAG00000002508	1174.1.1	GNG3	ENSG00000162188	G protein subunit gamma 3 [Source:HGNC Symbol;Acc:HGNC:4405]
1175	ENSBTAG00000002510	ENSBTAG00000002510	1175.1.1	HNRNPUL2	ENSG00000214753	heterogeneous nuclear ribonucleoprotein U like 2 [Source:HGNC Symbol;Acc:HGNC:25451]
1176	ENSBTAG00000002512	ENSBTAG00000002512	1176.1.1	HAUS1	ENSG00000152240	HAUS augmin like complex subunit 1 [Source:HGNC Symbol;Acc:HGNC:25174]
1177	ENSBTAG00000002516	ENSBTAG00000002516	1177.1.1	YJU2B	ENSG00000104957	YJU2 splicing factor homolog B [Source:HGNC Symbol;Acc:HGNC:28118]
1178	ENSBTAG00000002520	ENSBTAG00000002520	1178.1.1	CELF1	ENSG00000149187	CUGBP Elav-like family member 1 [Source:HGNC Symbol;Acc:HGNC:2549]
1179	ENSBTAG00000002524	ENSBTAG00000002524	1179.1.1	MRI1	ENSG00000037757	methylthioribose-1-phosphate isomerase 1 [Source:HGNC Symbol;Acc:HGNC:28469]
1181	ENSBTAG00000002526	ENSBTAG00000002526	1181.1.1	BDH2	ENSG00000164039	3-hydroxybutyrate dehydrogenase 2 [Source:HGNC Symbol;Acc:HGNC:32389]
1182	ENSBTAG00000002527	ENSBTAG00000002527	1182.1.1	ZSWIM4	ENSG00000132003	zinc finger SWIM-type containing 4 [Source:HGNC Symbol;Acc:HGNC:25704]
1183	ENSBTAG00000002528	ENSBTAG00000002528	1183.1.1	EIF3A	ENSG00000107581	eukaryotic translation initiation factor 3 subunit A [Source:HGNC Symbol;Acc:HGNC:3271]
1184	ENSBTAG00000002531	ENSBTAG00000002531	1184.1.1	ARHGAP10	ENSG00000071205	Rho GTPase activating protein 10 [Source:HGNC Symbol;Acc:HGNC:26099]
1185	ENSBTAG00000002534	ENSBTAG00000002534	1185.1.1	EEF1E1	ENSG00000124802	eukaryotic translation elongation factor 1 epsilon 1 [Source:HGNC Symbol;Acc:HGNC:3212]
1186	ENSBTAG00000002539	ENSBTAG00000002539	1186.1.1	TRIOBP	ENSG00000100106	TRIO and F-actin binding protein [Source:HGNC Symbol;Acc:HGNC:17009]
1187	ENSBTAG00000002542	ENSBTAG00000002542	1187.1.1	KRCC1	ENSG00000172086	lysine rich coiled-coil 1 [Source:HGNC Symbol;Acc:HGNC:28039]
1189	ENSBTAG00000002554	ENSBTAG00000002554	1189.1.1	TCAF1	ENSG00000198420	TRPM8 channel associated factor 1 [Source:HGNC Symbol;Acc:HGNC:22201]
1190	ENSBTAG00000002555	ENSBTAG00000002555	1190.1.1	PDZK1IP1	ENSG00000162366	PDZK1 interacting protein 1 [Source:HGNC Symbol;Acc:HGNC:16887]
1191	ENSBTAG00000002557	ENSBTAG00000002557	1191.1.1	MRPL19	ENSG00000115364	mitochondrial ribosomal protein L19 [Source:HGNC Symbol;Acc:HGNC:14052]
1192	ENSBTAG00000002564	ENSBTAG00000002564	1192.1.1	DLG4	ENSG00000132535	discs large MAGUK scaffold protein 4 [Source:HGNC Symbol;Acc:HGNC:2903]
1194	ENSBTAG00000002570	ENSBTAG00000002570	1194.1.1	PPP1R21	ENSG00000162869	protein phosphatase 1 regulatory subunit 21 [Source:HGNC Symbol;Acc:HGNC:30595]
1195	ENSBTAG00000002571	ENSBTAG00000002571	1195.1.1	PDCD2L	ENSG00000126249	programmed cell death 2 like [Source:HGNC Symbol;Acc:HGNC:28194]
1196	ENSBTAG00000002573	ENSBTAG00000002573	1196.1.1	UBA2	ENSG00000126261	ubiquitin like modifier activating enzyme 2 [Source:HGNC Symbol;Acc:HGNC:30661]
1197	ENSBTAG00000002574	ENSBTAG00000002574	1197.1.1	MYOZ2	ENSG00000172399	myozenin 2 [Source:HGNC Symbol;Acc:HGNC:1330]
1199	ENSBTAG00000002576	ENSBTAG00000002576	1199.1.1	GLDN	ENSG00000186417	gliomedin [Source:HGNC Symbol;Acc:HGNC:29514]
1200	ENSBTAG00000002578	ENSBTAG00000002578	1200.1.1	ZMYND11	ENSG00000015171	zinc finger MYND-type containing 11 [Source:HGNC Symbol;Acc:HGNC:16966]
1201	ENSBTAG00000002579	ENSBTAG00000002579	1201.1.1	FBL	ENSG00000105202	fibrillarin [Source:HGNC Symbol;Acc:HGNC:3599]
1202	ENSBTAG00000002580	ENSBTAG00000002580	1202.1.1	MYH14	ENSG00000105357	myosin heavy chain 14 [Source:HGNC Symbol;Acc:HGNC:23212]
1203	ENSBTAG00000002586	ENSBTAG00000002586	1203.1.1	TCF12	ENSG00000140262	transcription factor 12 [Source:HGNC Symbol;Acc:HGNC:11623]
1204	ENSBTAG00000002590	ENSBTAG00000002590	1204.1.1	EXOSC10	ENSG00000171824	exosome component 10 [Source:HGNC Symbol;Acc:HGNC:9138]
1205	ENSBTAG00000002591	ENSBTAG00000002591	1205.1.1	GLTP	ENSG00000139433	glycolipid transfer protein [Source:HGNC Symbol;Acc:HGNC:24867]
1206	ENSBTAG00000002594	ENSBTAG00000002594	1206.1.1	ZNF436	ENSG00000125945	zinc finger protein 436 [Source:HGNC Symbol;Acc:HGNC:20814]
1208	ENSBTAG00000002600	ENSBTAG00000002600	1208.1.1	EFCAB7	ENSG00000203965	EF-hand calcium binding domain 7 [Source:HGNC Symbol;Acc:HGNC:29379]
1209	ENSBTAG00000002603	ENSBTAG00000002603	1209.1.1	PRPF39	ENSG00000185246	pre-mRNA processing factor 39 [Source:HGNC Symbol;Acc:HGNC:20314]
1210	ENSBTAG00000002606	ENSBTAG00000002606	1210.1.1	LGR4	ENSG00000205213	leucine rich repeat containing G protein-coupled receptor 4 [Source:HGNC Symbol;Acc:HGNC:13299]
1211	ENSBTAG00000002609	ENSBTAG00000002609	1211.1.1	TMIGD1	ENSG00000182271	transmembrane and immunoglobulin domain containing 1 [Source:HGNC Symbol;Acc:HGNC:32431]
1212	ENSBTAG00000002610	ENSBTAG00000002610	1212.1.1	FKBP3	ENSG00000100442	FKBP prolyl isomerase 3 [Source:HGNC Symbol;Acc:HGNC:3719]
1213	ENSBTAG00000002612	ENSBTAG00000002612	1213.1.1	FANCM	ENSG00000187790	FA complementation group M [Source:HGNC Symbol;Acc:HGNC:23168]
1214	ENSBTAG00000002613	ENSBTAG00000002613	1214.1.1	MIS18BP1	ENSG00000129534	MIS18 binding protein 1 [Source:HGNC Symbol;Acc:HGNC:20190]
1215	ENSBTAG00000002614	ENSBTAG00000002614	1215.1.1	RUFY2	ENSG00000204130	RUN and FYVE domain containing 2 [Source:HGNC Symbol;Acc:HGNC:19761]
1216	ENSBTAG00000002623	ENSBTAG00000002623	1216.1.1	SAMSN1	ENSG00000155307	SAM domain, SH3 domain and nuclear localization signals 1 [Source:HGNC Symbol;Acc:HGNC:10528]
1217	ENSBTAG00000002624	ENSBTAG00000002624	1217.1.1	PSTPIP2	ENSG00000152229	proline-serine-threonine phosphatase interacting protein 2 [Source:HGNC Symbol;Acc:HGNC:9581]
1218	ENSBTAG00000002625	ENSBTAG00000002625	1218.1.1	MAP3K7	ENSG00000135341	mitogen-activated protein kinase kinase kinase 7 [Source:HGNC Symbol;Acc:HGNC:6859]
1219	ENSBTAG00000002627	ENSBTAG00000002627	1219.1.1	ZRANB2	ENSG00000132485	zinc finger RANBP2-type containing 2 [Source:HGNC Symbol;Acc:HGNC:13058]
1220	ENSBTAG00000002628	ENSBTAG00000002628	1220.1.1	SLC44A2	ENSG00000129353	solute carrier family 44 member 2 (CTL2 blood group) [Source:HGNC Symbol;Acc:HGNC:17292]
1221	ENSBTAG00000002631	ENSBTAG00000002631	1221.1.1	SCNN1A	ENSG00000111319	sodium channel epithelial 1 subunit alpha [Source:HGNC Symbol;Acc:HGNC:10599]
1222	ENSBTAG00000002632	ENSBTAG00000002632	1222.1.1	CSN2	ENSG00000135222	casein beta [Source:HGNC Symbol;Acc:HGNC:2447]
1223	ENSBTAG00000002635	ENSBTAG00000002635	1223.1.1	PGLYRP1	ENSG00000008438	peptidoglycan recognition protein 1 [Source:HGNC Symbol;Acc:HGNC:8904]
1224	ENSBTAG00000002639	ENSBTAG00000002639	1224.1.1	ZDHHC7	ENSG00000153786	zinc finger DHHC-type palmitoyltransferase 7 [Source:HGNC Symbol;Acc:HGNC:18459]
1225	ENSBTAG00000002640	ENSBTAG00000002640	1225.1.1	KALRN	ENSG00000160145	kalirin RhoGEF kinase [Source:HGNC Symbol;Acc:HGNC:4814]
1226	ENSBTAG00000002643	ENSBTAG00000002643	1226.1.1	VPS52	ENSG00000223501	VPS52 subunit of GARP complex [Source:HGNC Symbol;Acc:HGNC:10518]
1227	ENSBTAG00000002644	ENSBTAG00000002644	1227.1.1	KCNQ4	ENSG00000117013	potassium voltage-gated channel subfamily Q member 4 [Source:HGNC Symbol;Acc:HGNC:6298]
1228	ENSBTAG00000002645	ENSBTAG00000002645	1228.1.1	SH3BP5L	ENSG00000175137	SH3 binding domain protein 5 like [Source:HGNC Symbol;Acc:HGNC:29360]
1229	ENSBTAG00000002646	ENSBTAG00000002646	1229.1.1	DYNC1I2	ENSG00000077380	dynein cytoplasmic 1 intermediate chain 2 [Source:HGNC Symbol;Acc:HGNC:2964]
1230	ENSBTAG00000002647	ENSBTAG00000002647	1230.1.1	RGS10	ENSG00000148908	regulator of G protein signaling 10 [Source:HGNC Symbol;Acc:HGNC:9992]
1231	ENSBTAG00000002648	ENSBTAG00000002648	1231.1.1	RPS18	ENSG00000231500	ribosomal protein S18 [Source:HGNC Symbol;Acc:HGNC:10401]
1232	ENSBTAG00000002650	ENSBTAG00000002650	1232.1.1	ZPR1	ENSG00000109917	ZPR1 zinc finger [Source:HGNC Symbol;Acc:HGNC:13051]
1233	ENSBTAG00000002651	ENSBTAG00000002651	1233.1.1	PKP2	ENSG00000057294	plakophilin 2 [Source:HGNC Symbol;Acc:HGNC:9024]
1234	ENSBTAG00000002654	ENSBTAG00000002654	1234.1.1	DNAJC7	ENSG00000168259	DnaJ heat shock protein family (Hsp40) member C7 [Source:HGNC Symbol;Acc:HGNC:12392]
1235	ENSBTAG00000002655	ENSBTAG00000002655	1235.1.1	ZWINT	ENSG00000122952	ZW10 interacting kinetochore protein [Source:HGNC Symbol;Acc:HGNC:13195]
1236	ENSBTAG00000002657	ENSBTAG00000002657	1236.1.1	NKIRAS2	ENSG00000168256	NFKB inhibitor interacting Ras like 2 [Source:HGNC Symbol;Acc:HGNC:17898]
1237	ENSBTAG00000002658	ENSBTAG00000002658	1237.1.1	STAM	ENSG00000136738	signal transducing adaptor molecule [Source:HGNC Symbol;Acc:HGNC:11357]
1238	ENSBTAG00000002661	ENSBTAG00000002661	1238.1.1	ISLR2	ENSG00000167178	immunoglobulin superfamily containing leucine rich repeat 2 [Source:HGNC Symbol;Acc:HGNC:29286]
1239	ENSBTAG00000002663	ENSBTAG00000002663	1239.1.1	BCAS3	ENSG00000141376	BCAS3 microtubule associated cell migration factor [Source:HGNC Symbol;Acc:HGNC:14347]
1240	ENSBTAG00000002669	ENSBTAG00000002669	1240.1.1	RASSF4	ENSG00000107551	Ras association domain family member 4 [Source:HGNC Symbol;Acc:HGNC:20793]
1241	ENSBTAG00000002670	ENSBTAG00000002670	1241.1.1	DEPP1	ENSG00000165507	DEPP autophagy regulator 1 [Source:HGNC Symbol;Acc:HGNC:23355]
1242	ENSBTAG00000002673	ENSBTAG00000002673	1242.1.1	FIGNL2	ENSG00000261308	fidgetin like 2 [Source:HGNC Symbol;Acc:HGNC:13287]
1243	ENSBTAG00000002676	ENSBTAG00000002676	1243.1.1	SAE1	ENSG00000142230	SUMO1 activating enzyme subunit 1 [Source:HGNC Symbol;Acc:HGNC:30660]
1244	ENSBTAG00000002678	ENSBTAG00000002678	1244.1.1	MED18	ENSG00000130772	mediator complex subunit 18 [Source:HGNC Symbol;Acc:HGNC:25944]
1245	ENSBTAG00000002680	ENSBTAG00000002680	1245.1.1	TMEM132E	ENSG00000181291	transmembrane protein 132E [Source:HGNC Symbol;Acc:HGNC:26991]
1246	ENSBTAG00000002682	ENSBTAG00000002682	1246.1.1	MARK4	ENSG00000007047	microtubule affinity regulating kinase 4 [Source:HGNC Symbol;Acc:HGNC:13538]
1247	ENSBTAG00000002683	ENSBTAG00000002683	1247.1.1	PFKP	ENSG00000067057	phosphofructokinase, platelet [Source:HGNC Symbol;Acc:HGNC:8878]
1248	ENSBTAG00000002685	ENSBTAG00000002685	1248.1.1	PITRM1	ENSG00000107959	pitrilysin metallopeptidase 1 [Source:HGNC Symbol;Acc:HGNC:17663]
1249	ENSBTAG00000002687	ENSBTAG00000002687	1249.1.1	TSHZ3	ENSG00000121297	teashirt zinc finger homeobox 3 [Source:HGNC Symbol;Acc:HGNC:30700]
1250	ENSBTAG00000002688	ENSBTAG00000002688	1250.1.1	ATP1B1	ENSG00000143153	ATPase Na+/K+ transporting subunit beta 1 [Source:HGNC Symbol;Acc:HGNC:804]
1251	ENSBTAG00000002689	ENSBTAG00000002689	1251.1.1	NME7	ENSG00000143156	NME/NM23 family member 7 [Source:HGNC Symbol;Acc:HGNC:20461]
1252	ENSBTAG00000002690	ENSBTAG00000002690	1252.1.1	BLZF1	ENSG00000117475	basic leucine zipper nuclear factor 1 [Source:HGNC Symbol;Acc:HGNC:1065]
1253	ENSBTAG00000002693	ENSBTAG00000002693	1253.1.1	KANSL2	ENSG00000139620	KAT8 regulatory NSL complex subunit 2 [Source:HGNC Symbol;Acc:HGNC:26024]
1254	ENSBTAG00000002695	ENSBTAG00000002695	1254.1.1	MYO1H	ENSG00000174527	myosin IH [Source:HGNC Symbol;Acc:HGNC:13879]
1255	ENSBTAG00000002697	ENSBTAG00000002697	1255.1.1	KCTD10	ENSG00000110906	potassium channel tetramerization domain containing 10 [Source:HGNC Symbol;Acc:HGNC:23236]
1256	ENSBTAG00000002698	ENSBTAG00000002698	1256.1.1	UBE3B	ENSG00000151148	ubiquitin protein ligase E3B [Source:HGNC Symbol;Acc:HGNC:13478]
1257	ENSBTAG00000002699	ENSBTAG00000002699	1257.1.1	KIT	ENSG00000157404	KIT proto-oncogene, receptor tyrosine kinase [Source:HGNC Symbol;Acc:HGNC:6342]
1258	ENSBTAG00000002702	ENSBTAG00000002702	1258.1.1	TSPAN32	ENSG00000064201	tetraspanin 32 [Source:HGNC Symbol;Acc:HGNC:13410]
1259	ENSBTAG00000002703	ENSBTAG00000002703	1259.1.1	ATP6V1A	ENSG00000114573	ATPase H+ transporting V1 subunit A [Source:HGNC Symbol;Acc:HGNC:851]
1260	ENSBTAG00000002704	ENSBTAG00000002704	1260.1.1	POMT2	ENSG00000009830	protein O-mannosyltransferase 2 [Source:HGNC Symbol;Acc:HGNC:19743]
1261	ENSBTAG00000002706	ENSBTAG00000002706	1261.1.1	GSTZ1	ENSG00000100577	glutathione S-transferase zeta 1 [Source:HGNC Symbol;Acc:HGNC:4643]
1262	ENSBTAG00000002707	ENSBTAG00000002707	1262.1.1	IPO4	ENSG00000196497	importin 4 [Source:HGNC Symbol;Acc:HGNC:19426]
1263	ENSBTAG00000002708	ENSBTAG00000002708	1263.1.1	MRPL42	ENSG00000198015	mitochondrial ribosomal protein L42 [Source:HGNC Symbol;Acc:HGNC:14493]
1264	ENSBTAG00000002709	ENSBTAG00000002709	1264.1.1	TM9SF1	ENSG00000100926	transmembrane 9 superfamily member 1 [Source:HGNC Symbol;Acc:HGNC:11864]
1265	ENSBTAG00000002710	ENSBTAG00000002710	1265.1.1	TSSK4	ENSG00000139908	testis specific serine kinase 4 [Source:HGNC Symbol;Acc:HGNC:19825]
1267	ENSBTAG00000002714	ENSBTAG00000002714	1267.1.1	GNAI1	ENSG00000127955	G protein subunit alpha i1 [Source:HGNC Symbol;Acc:HGNC:4384]
1268	ENSBTAG00000002715	ENSBTAG00000002715	1268.1.1	GMPR2	ENSG00000100938	guanosine monophosphate reductase 2 [Source:HGNC Symbol;Acc:HGNC:4377]
1269	ENSBTAG00000002716	ENSBTAG00000002716	1269.1.1	NOL10	ENSG00000115761	nucleolar protein 10 [Source:HGNC Symbol;Acc:HGNC:25862]
1270	ENSBTAG00000002718	ENSBTAG00000002718	1270.1.1	TINF2	ENSG00000092330	TERF1 interacting nuclear factor 2 [Source:HGNC Symbol;Acc:HGNC:11824]
1271	ENSBTAG00000002720	ENSBTAG00000002720	1271.1.1	PRPF38A	ENSG00000134748	pre-mRNA processing factor 38A [Source:HGNC Symbol;Acc:HGNC:25930]
1272	ENSBTAG00000002725	ENSBTAG00000002725	1272.1.1	RNGTT	ENSG00000111880	RNA guanylyltransferase and 5'-phosphatase [Source:HGNC Symbol;Acc:HGNC:10073]
1273	ENSBTAG00000002726	ENSBTAG00000002726	1273.1.1	CDC27	ENSG00000004897	cell division cycle 27 [Source:HGNC Symbol;Acc:HGNC:1728]
1274	ENSBTAG00000002727	ENSBTAG00000002727	1274.1.1	PHACTR4	ENSG00000204138	phosphatase and actin regulator 4 [Source:HGNC Symbol;Acc:HGNC:25793]
1275	ENSBTAG00000002728	ENSBTAG00000002728	1275.1.1	ARID1B	ENSG00000049618	AT-rich interaction domain 1B [Source:HGNC Symbol;Acc:HGNC:18040]
1276	ENSBTAG00000002730	ENSBTAG00000002730	1276.1.1	ELP3	ENSG00000134014	elongator acetyltransferase complex subunit 3 [Source:HGNC Symbol;Acc:HGNC:20696]
1278	ENSBTAG00000002735	ENSBTAG00000002735	1278.1.1	METTL26	ENSG00000130731	methyltransferase like 26 [Source:HGNC Symbol;Acc:HGNC:14141]
1279	ENSBTAG00000002736	ENSBTAG00000002736	1279.1.1	DNMT1	ENSG00000130816	DNA methyltransferase 1 [Source:HGNC Symbol;Acc:HGNC:2976]
1280	ENSBTAG00000002738	ENSBTAG00000002738	1280.1.1	S1PR2	ENSG00000267534	sphingosine-1-phosphate receptor 2 [Source:HGNC Symbol;Acc:HGNC:3169]
1281	ENSBTAG00000002739	ENSBTAG00000002739	1281.1.1	PDE1C	ENSG00000154678	phosphodiesterase 1C [Source:HGNC Symbol;Acc:HGNC:8776]
1282	ENSBTAG00000002742	ENSBTAG00000002742	1282.1.1	MSH2	ENSG00000095002	mutS homolog 2 [Source:HGNC Symbol;Acc:HGNC:7325]
1283	ENSBTAG00000002743	ENSBTAG00000002743	1283.1.1	OSGEP	ENSG00000092094	O-sialoglycoprotein endopeptidase [Source:HGNC Symbol;Acc:HGNC:18028]
1284	ENSBTAG00000002744	ENSBTAG00000002744	1284.1.1	MUSK	ENSG00000030304	muscle associated receptor tyrosine kinase [Source:HGNC Symbol;Acc:HGNC:7525]
1285	ENSBTAG00000002745	ENSBTAG00000002745	1285.1.1	APEX1	ENSG00000100823	apurinic/apyrimidinic endodeoxyribonuclease 1 [Source:HGNC Symbol;Acc:HGNC:587]
1286	ENSBTAG00000002746	ENSBTAG00000002746	1286.1.1	OSTF1	ENSG00000134996	osteoclast stimulating factor 1 [Source:HGNC Symbol;Acc:HGNC:8510]
1287	ENSBTAG00000002747	ENSBTAG00000002747	1287.1.1	ABCA5	ENSG00000154265	ATP binding cassette subfamily A member 5 [Source:HGNC Symbol;Acc:HGNC:35]
1288	ENSBTAG00000002748	ENSBTAG00000002748	1288.1.1	PIP4P1	ENSG00000165782	phosphatidylinositol-4,5-bisphosphate 4-phosphatase 1 [Source:HGNC Symbol;Acc:HGNC:19299]
1289	ENSBTAG00000002750	ENSBTAG00000002750	1289.1.1	KRIT1	ENSG00000001631	KRIT1 ankyrin repeat containing [Source:HGNC Symbol;Acc:HGNC:1573]
1290	ENSBTAG00000002755	ENSBTAG00000002755	1290.1.1	ANKRD12	ENSG00000101745	ankyrin repeat domain 12 [Source:HGNC Symbol;Acc:HGNC:29135]
1291	ENSBTAG00000002756	ENSBTAG00000002756	1291.1.1	CDCA2	ENSG00000184661	cell division cycle associated 2 [Source:HGNC Symbol;Acc:HGNC:14623]
1292	ENSBTAG00000002763	ENSBTAG00000002763	1292.1.1	KMT2B	ENSG00000272333	lysine methyltransferase 2B [Source:HGNC Symbol;Acc:HGNC:15840]
1293	ENSBTAG00000002764	ENSBTAG00000002764	1293.1.1	IGFLR1	ENSG00000126246	IGF like family receptor 1 [Source:HGNC Symbol;Acc:HGNC:23620]
1294	ENSBTAG00000002767	ENSBTAG00000002767	1294.1.1	GNB4	ENSG00000114450	G protein subunit beta 4 [Source:HGNC Symbol;Acc:HGNC:20731]
1295	ENSBTAG00000002769	ENSBTAG00000002769	1295.1.1	AP1G1	ENSG00000166747	adaptor related protein complex 1 subunit gamma 1 [Source:HGNC Symbol;Acc:HGNC:555]
1296	ENSBTAG00000002770	ENSBTAG00000002770	1296.1.1	TCN2	ENSG00000185339	transcobalamin 2 [Source:HGNC Symbol;Acc:HGNC:11653]
1297	ENSBTAG00000002774	ENSBTAG00000002774	1297.1.1	PTPN23	ENSG00000076201	protein tyrosine phosphatase non-receptor type 23 [Source:HGNC Symbol;Acc:HGNC:14406]
1298	ENSBTAG00000002775	ENSBTAG00000002775	1298.1.1	C12orf71	ENSG00000214700	chromosome 12 open reading frame 71 [Source:HGNC Symbol;Acc:HGNC:34452]
1299	ENSBTAG00000002778	ENSBTAG00000002778	1299.1.1	SF3B2	ENSG00000087365	splicing factor 3b subunit 2 [Source:HGNC Symbol;Acc:HGNC:10769]
1300	ENSBTAG00000002779	ENSBTAG00000002779	1300.1.1	GABRP	ENSG00000094755	gamma-aminobutyric acid type A receptor subunit pi [Source:HGNC Symbol;Acc:HGNC:4089]
1301	ENSBTAG00000002782	ENSBTAG00000002782	1301.1.1	ZC3H7B	ENSG00000100403	zinc finger CCCH-type containing 7B [Source:HGNC Symbol;Acc:HGNC:30869]
1302	ENSBTAG00000002783	ENSBTAG00000002783	1302.1.1	PCYOX1	ENSG00000116005	prenylcysteine oxidase 1 [Source:HGNC Symbol;Acc:HGNC:20588]
1303	ENSBTAG00000002784	ENSBTAG00000002784	1303.1.1	COPS5	ENSG00000121022	COP9 signalosome subunit 5 [Source:HGNC Symbol;Acc:HGNC:2240]
1304	ENSBTAG00000002788	ENSBTAG00000002788	1304.1.1	RAB27B	ENSG00000041353	RAB27B, member RAS oncogene family [Source:HGNC Symbol;Acc:HGNC:9767]
1306	ENSBTAG00000002792	ENSBTAG00000002792	1306.1.1	FUT11	ENSG00000196968	fucosyltransferase 11 [Source:HGNC Symbol;Acc:HGNC:19233]
1307	ENSBTAG00000002795	ENSBTAG00000002795	1307.1.1	NKTR	ENSG00000114857	natural killer cell triggering receptor [Source:HGNC Symbol;Acc:HGNC:7833]
1308	ENSBTAG00000002796	ENSBTAG00000002796	1308.1.1	KLHL3	ENSG00000146021	kelch like family member 3 [Source:HGNC Symbol;Acc:HGNC:6354]
1309	ENSBTAG00000002798	ENSBTAG00000002798	1309.1.1	NABP2	ENSG00000139579	nucleic acid binding protein 2 [Source:HGNC Symbol;Acc:HGNC:28412]
1310	ENSBTAG00000002799	ENSBTAG00000002799	1310.1.1	SLC39A5	ENSG00000139540	solute carrier family 39 member 5 [Source:HGNC Symbol;Acc:HGNC:20502]
1311	ENSBTAG00000002804	ENSBTAG00000002804	1311.1.1	PDGFRB	ENSG00000113721	platelet derived growth factor receptor beta [Source:HGNC Symbol;Acc:HGNC:8804]
1312	ENSBTAG00000002808	ENSBTAG00000002808	1312.1.1	PSMA3	ENSG00000100567	proteasome 20S subunit alpha 3 [Source:HGNC Symbol;Acc:HGNC:9532]
1313	ENSBTAG00000002809	ENSBTAG00000002809	1313.1.1	CAPN10	ENSG00000142330	calpain 10 [Source:HGNC Symbol;Acc:HGNC:1477]
1314	ENSBTAG00000002810	ENSBTAG00000002810	1314.1.1	ZNF777	ENSG00000196453	zinc finger protein 777 [Source:HGNC Symbol;Acc:HGNC:22213]
1315	ENSBTAG00000002813	ENSBTAG00000002813	1315.1.1	GAB1	ENSG00000109458	GRB2 associated binding protein 1 [Source:HGNC Symbol;Acc:HGNC:4066]
1316	ENSBTAG00000002816	ENSBTAG00000002816	1316.1.1	SARM1	ENSG00000004139	sterile alpha and TIR motif containing 1 [Source:HGNC Symbol;Acc:HGNC:17074]
1317	ENSBTAG00000002817	ENSBTAG00000002817	1317.1.1	SLC46A1	ENSG00000076351	solute carrier family 46 member 1 [Source:HGNC Symbol;Acc:HGNC:30521]
1318	ENSBTAG00000002823	ENSBTAG00000002823	1318.1.1	MPZL1	ENSG00000197965	myelin protein zero like 1 [Source:HGNC Symbol;Acc:HGNC:7226]
1319	ENSBTAG00000002826	ENSBTAG00000002826	1319.1.1	CLSPN	ENSG00000092853	claspin [Source:HGNC Symbol;Acc:HGNC:19715]
1320	ENSBTAG00000002827	ENSBTAG00000002827	1320.1.1	ACAT2	ENSG00000120437	acetyl-CoA acetyltransferase 2 [Source:HGNC Symbol;Acc:HGNC:94]
1321	ENSBTAG00000002828	ENSBTAG00000002828	1321.1.1	RNF185	ENSG00000138942	ring finger protein 185 [Source:HGNC Symbol;Acc:HGNC:26783]
1322	ENSBTAG00000002829	ENSBTAG00000002829	1322.1.1	TCP1	ENSG00000120438	t-complex 1 [Source:HGNC Symbol;Acc:HGNC:11655]
1323	ENSBTAG00000002830	ENSBTAG00000002830	1323.1.1	U2AF2	ENSG00000063244	U2 small nuclear RNA auxiliary factor 2 [Source:HGNC Symbol;Acc:HGNC:23156]
1324	ENSBTAG00000002833	ENSBTAG00000002833	1324.1.1	FBXO22	ENSG00000167196	F-box protein 22 [Source:HGNC Symbol;Acc:HGNC:13593]
1325	ENSBTAG00000002834	ENSBTAG00000002834	1325.1.1	CCDC69	ENSG00000198624	coiled-coil domain containing 69 [Source:HGNC Symbol;Acc:HGNC:24487]
1326	ENSBTAG00000002835	ENSBTAG00000002835	1326.1.1	SMAD1	ENSG00000170365	SMAD family member 1 [Source:HGNC Symbol;Acc:HGNC:6767]
1327	ENSBTAG00000002836	ENSBTAG00000002836	1327.1.1	TAF3	ENSG00000165632	TATA-box binding protein associated factor 3 [Source:HGNC Symbol;Acc:HGNC:17303]
1328	ENSBTAG00000002837	ENSBTAG00000002837	1328.1.1	TOR1B	ENSG00000136816	torsin family 1 member B [Source:HGNC Symbol;Acc:HGNC:11995]
1329	ENSBTAG00000002842	ENSBTAG00000002842	1329.1.1	HEATR4	ENSG00000187105	HEAT repeat containing 4 [Source:HGNC Symbol;Acc:HGNC:16761]
1330	ENSBTAG00000002843	ENSBTAG00000002843	1330.1.1	ACOT4	ENSG00000177465	acyl-CoA thioesterase 4 [Source:HGNC Symbol;Acc:HGNC:19748]
1331	ENSBTAG00000002844	ENSBTAG00000002844	1331.1.1	PPFIA3	ENSG00000177380	PTPRF interacting protein alpha 3 [Source:HGNC Symbol;Acc:HGNC:9247]
1332	ENSBTAG00000002846	ENSBTAG00000002846	1332.1.1	TRAF3IP3	ENSG00000009790	TRAF3 interacting protein 3 [Source:HGNC Symbol;Acc:HGNC:30766]
1333	ENSBTAG00000002847	ENSBTAG00000002847	1333.1.1	D2HGDH	ENSG00000180902	D-2-hydroxyglutarate dehydrogenase [Source:HGNC Symbol;Acc:HGNC:28358]
1334	ENSBTAG00000002848	ENSBTAG00000002848	1334.1.1	C1orf74	ENSG00000162757	chromosome 1 open reading frame 74 [Source:HGNC Symbol;Acc:HGNC:26319]
1335	ENSBTAG00000002849	ENSBTAG00000002849	1335.1.1	IRF6	ENSG00000117595	interferon regulatory factor 6 [Source:HGNC Symbol;Acc:HGNC:6121]
1336	ENSBTAG00000002853	ENSBTAG00000002853	1336.1.1	HRC	ENSG00000130528	histidine rich calcium binding protein [Source:HGNC Symbol;Acc:HGNC:5178]
1337	ENSBTAG00000002854	ENSBTAG00000002854	1337.1.1	TMEM63A	ENSG00000196187	transmembrane protein 63A [Source:HGNC Symbol;Acc:HGNC:29118]
1338	ENSBTAG00000002863	ENSBTAG00000002863	1338.1.1	ACAA2	ENSG00000167315	acetyl-CoA acyltransferase 2 [Source:HGNC Symbol;Acc:HGNC:83]
1339	ENSBTAG00000002865	ENSBTAG00000002865	1339.1.1	KCNIP1	ENSG00000182132	potassium voltage-gated channel interacting protein 1 [Source:HGNC Symbol;Acc:HGNC:15521]
1340	ENSBTAG00000002866	ENSBTAG00000002866	1340.1.1	RPIA	ENSG00000153574	ribose 5-phosphate isomerase A [Source:HGNC Symbol;Acc:HGNC:10297]
1341	ENSBTAG00000002869	ENSBTAG00000002869	1341.1.1	ARL4A	ENSG00000122644	ADP ribosylation factor like GTPase 4A [Source:HGNC Symbol;Acc:HGNC:695]
1342	ENSBTAG00000002871	ENSBTAG00000002871	1342.1.1	COPS6	ENSG00000168090	COP9 signalosome subunit 6 [Source:HGNC Symbol;Acc:HGNC:21749]
1343	ENSBTAG00000002874	ENSBTAG00000002874	1343.1.1	TMEM183A	ENSG00000163444	transmembrane protein 183A [Source:HGNC Symbol;Acc:HGNC:20173]
1344	ENSBTAG00000002878	ENSBTAG00000002878	1344.1.1	CHRD	ENSG00000090539	chordin [Source:HGNC Symbol;Acc:HGNC:1949]
1345	ENSBTAG00000002879	ENSBTAG00000002879	1345.1.1	DCPS	ENSG00000110063	decapping enzyme, scavenger [Source:HGNC Symbol;Acc:HGNC:29812]
1346	ENSBTAG00000002880	ENSBTAG00000002880	1346.1.1	SORBS1	ENSG00000095637	sorbin and SH3 domain containing 1 [Source:HGNC Symbol;Acc:HGNC:14565]
1347	ENSBTAG00000002881	ENSBTAG00000002881	1347.1.1	AP4M1	ENSG00000221838	adaptor related protein complex 4 subunit mu 1 [Source:HGNC Symbol;Acc:HGNC:574]
1348	ENSBTAG00000002882	ENSBTAG00000002882	1348.1.1	LMNB1	ENSG00000113368	lamin B1 [Source:HGNC Symbol;Acc:HGNC:6637]
1349	ENSBTAG00000002883	ENSBTAG00000002883	1349.1.1	RPTOR	ENSG00000141564	regulatory associated protein of MTOR complex 1 [Source:HGNC Symbol;Acc:HGNC:30287]
1350	ENSBTAG00000002885	ENSBTAG00000002885	1350.1.1	MSR1	ENSG00000038945	macrophage scavenger receptor 1 [Source:HGNC Symbol;Acc:HGNC:7376]
1351	ENSBTAG00000002887	ENSBTAG00000002887	1351.1.1	DDI1	ENSG00000170967	DNA damage inducible 1 homolog 1 [Source:HGNC Symbol;Acc:HGNC:18961]
1352	ENSBTAG00000002888	ENSBTAG00000002888	1352.1.1	TMTC2	ENSG00000179104	transmembrane O-mannosyltransferase targeting cadherins 2 [Source:HGNC Symbol;Acc:HGNC:25440]
1353	ENSBTAG00000002896	ENSBTAG00000002896	1353.1.1	KPNA6	ENSG00000025800	karyopherin subunit alpha 6 [Source:HGNC Symbol;Acc:HGNC:6399]
1354	ENSBTAG00000002902	ENSBTAG00000002902	1354.1.1	ANO6	ENSG00000177119	anoctamin 6 [Source:HGNC Symbol;Acc:HGNC:25240]
1355	ENSBTAG00000002904	ENSBTAG00000002904	1355.1.1	ZNF787	ENSG00000142409	zinc finger protein 787 [Source:HGNC Symbol;Acc:HGNC:26998]
1356	ENSBTAG00000002907	ENSBTAG00000002907	1356.1.1	C2CD3	ENSG00000168014	C2 domain containing 3 centriole elongation regulator [Source:HGNC Symbol;Acc:HGNC:24564]
1357	ENSBTAG00000002910	ENSBTAG00000002910	1357.1.1	ECHDC2	ENSG00000121310	enoyl-CoA hydratase domain containing 2 [Source:HGNC Symbol;Acc:HGNC:23408]
1358	ENSBTAG00000002914	ENSBTAG00000002914	1358.1.1	GALNT18	ENSG00000110328	polypeptide N-acetylgalactosaminyltransferase 18 [Source:HGNC Symbol;Acc:HGNC:30488]
1360	ENSBTAG00000002917	ENSBTAG00000002917	1360.1.1	PRKAG2	ENSG00000106617	protein kinase AMP-activated non-catalytic subunit gamma 2 [Source:HGNC Symbol;Acc:HGNC:9386]
1361	ENSBTAG00000002918	ENSBTAG00000002918	1361.1.1	RAD51	ENSG00000051180	RAD51 recombinase [Source:HGNC Symbol;Acc:HGNC:9817]
1362	ENSBTAG00000002920	ENSBTAG00000002920	1362.1.1	KAT6B	ENSG00000156650	lysine acetyltransferase 6B [Source:HGNC Symbol;Acc:HGNC:17582]
1363	ENSBTAG00000002921	ENSBTAG00000002921	1363.1.1	RMDN3	ENSG00000137824	regulator of microtubule dynamics 3 [Source:HGNC Symbol;Acc:HGNC:25550]
1364	ENSBTAG00000002922	ENSBTAG00000002922	1364.1.1	GAB2	ENSG00000033327	GRB2 associated binding protein 2 [Source:HGNC Symbol;Acc:HGNC:14458]
1365	ENSBTAG00000002923	ENSBTAG00000002923	1365.1.1	CX3CR1	ENSG00000168329	C-X3-C motif chemokine receptor 1 [Source:HGNC Symbol;Acc:HGNC:2558]
1366	ENSBTAG00000002929	ENSBTAG00000002929	1366.1.1	IRF4	ENSG00000137265	interferon regulatory factor 4 [Source:HGNC Symbol;Acc:HGNC:6119]
1367	ENSBTAG00000002931	ENSBTAG00000002931	1367.1.1	BEST3	ENSG00000127325	bestrophin 3 [Source:HGNC Symbol;Acc:HGNC:17105]
1368	ENSBTAG00000002935	ENSBTAG00000002935	1368.1.1	TMEM248	ENSG00000106609	transmembrane protein 248 [Source:HGNC Symbol;Acc:HGNC:25476]
1369	ENSBTAG00000002936	ENSBTAG00000002936	1369.1.1	PRRX2	ENSG00000167157	paired related homeobox 2 [Source:HGNC Symbol;Acc:HGNC:21338]
1370	ENSBTAG00000002937	ENSBTAG00000002937	1370.1.1	ADGRE3	ENSG00000131355	adhesion G protein-coupled receptor E3 [Source:HGNC Symbol;Acc:HGNC:23647]
1371	ENSBTAG00000002938	ENSBTAG00000002938	1371.1.1	CPED1	ENSG00000106034	cadherin like and PC-esterase domain containing 1 [Source:HGNC Symbol;Acc:HGNC:26159]
1372	ENSBTAG00000002939	ENSBTAG00000002939	1372.1.1	FURIN	ENSG00000140564	furin, paired basic amino acid cleaving enzyme [Source:HGNC Symbol;Acc:HGNC:8568]
1373	ENSBTAG00000002941	ENSBTAG00000002941	1373.1.1	FES	ENSG00000182511	FES proto-oncogene, tyrosine kinase [Source:HGNC Symbol;Acc:HGNC:3657]
1374	ENSBTAG00000002942	ENSBTAG00000002942	1374.1.1	SLC2A10	ENSG00000197496	solute carrier family 2 member 10 [Source:HGNC Symbol;Acc:HGNC:13444]
1375	ENSBTAG00000002944	ENSBTAG00000002944	1375.1.1	ATP5MC3	ENSG00000154518	ATP synthase membrane subunit c locus 3 [Source:HGNC Symbol;Acc:HGNC:843]
1376	ENSBTAG00000002947	ENSBTAG00000002947	1376.1.1	LY9	ENSG00000122224	lymphocyte antigen 9 [Source:HGNC Symbol;Acc:HGNC:6730]
1377	ENSBTAG00000002948	ENSBTAG00000002948	1377.1.1	SETD2	ENSG00000181555	SET domain containing 2, histone lysine methyltransferase [Source:HGNC Symbol;Acc:HGNC:18420]
1379	ENSBTAG00000002951	ENSBTAG00000002951	1379.1.1	CD244	ENSG00000122223	CD244 molecule [Source:HGNC Symbol;Acc:HGNC:18171]
1380	ENSBTAG00000002952	ENSBTAG00000002952	1380.1.1	TBX19	ENSG00000143178	T-box transcription factor 19 [Source:HGNC Symbol;Acc:HGNC:11596]
1381	ENSBTAG00000002953	ENSBTAG00000002953	1381.1.1	TXN	ENSG00000136810	thioredoxin [Source:HGNC Symbol;Acc:HGNC:12435]
1382	ENSBTAG00000002959	ENSBTAG00000002959	1382.1.1	LRCH1	ENSG00000136141	leucine rich repeats and calponin homology domain containing 1 [Source:HGNC Symbol;Acc:HGNC:20309]
1383	ENSBTAG00000002960	ENSBTAG00000002960	1383.1.1	WDR82	ENSG00000164091	WD repeat domain 82 [Source:HGNC Symbol;Acc:HGNC:28826]
1384	ENSBTAG00000002962	ENSBTAG00000002962	1384.1.1	PPM1M	ENSG00000164088	protein phosphatase, Mg2+/Mn2+ dependent 1M [Source:HGNC Symbol;Acc:HGNC:26506]
1385	ENSBTAG00000002964	ENSBTAG00000002964	1385.1.1	TXLNB	ENSG00000164440	taxilin beta [Source:HGNC Symbol;Acc:HGNC:21617]
1386	ENSBTAG00000002966	ENSBTAG00000002966	1386.1.1	DNAJC13	ENSG00000138246	DnaJ heat shock protein family (Hsp40) member C13 [Source:HGNC Symbol;Acc:HGNC:30343]
1387	ENSBTAG00000002970	ENSBTAG00000002970	1387.1.1	INTS6	ENSG00000102786	integrator complex subunit 6 [Source:HGNC Symbol;Acc:HGNC:14879]
1388	ENSBTAG00000002971	ENSBTAG00000002971	1388.1.1	CUTC	ENSG00000119929	cutC copper transporter [Source:HGNC Symbol;Acc:HGNC:24271]
1389	ENSBTAG00000002973	ENSBTAG00000002973	1389.1.1	RPP30	ENSG00000148688	ribonuclease P/MRP subunit p30 [Source:HGNC Symbol;Acc:HGNC:17688]
1390	ENSBTAG00000002976	ENSBTAG00000002976	1390.1.1	CD177	ENSG00000204936	CD177 molecule [Source:HGNC Symbol;Acc:HGNC:30072]
1391	ENSBTAG00000002977	ENSBTAG00000002977	1391.1.1	ECE1	ENSG00000117298	endothelin converting enzyme 1 [Source:HGNC Symbol;Acc:HGNC:3146]
1392	ENSBTAG00000002978	ENSBTAG00000002978	1392.1.1	PRKG2	ENSG00000138669	protein kinase cGMP-dependent 2 [Source:HGNC Symbol;Acc:HGNC:9416]
1393	ENSBTAG00000002979	ENSBTAG00000002979	1393.1.1	PIK3R3	ENSG00000117461	phosphoinositide-3-kinase regulatory subunit 3 [Source:HGNC Symbol;Acc:HGNC:8981]
1394	ENSBTAG00000002980	ENSBTAG00000002980	1394.1.1	GPT2	ENSG00000166123	glutamic--pyruvic transaminase 2 [Source:HGNC Symbol;Acc:HGNC:18062]
1395	ENSBTAG00000002985	ENSBTAG00000002985	1395.1.1	KCNMB1	ENSG00000145936	potassium calcium-activated channel subfamily M regulatory beta subunit 1 [Source:HGNC Symbol;Acc:HGNC:6285]
1396	ENSBTAG00000002988	ENSBTAG00000002988	1396.1.1	MACO1	ENSG00000204178	macoilin 1 [Source:HGNC Symbol;Acc:HGNC:25572]
1397	ENSBTAG00000002993	ENSBTAG00000002993	1397.1.1	SFT2D1	ENSG00000198818	SFT2 domain containing 1 [Source:HGNC Symbol;Acc:HGNC:21102]
1398	ENSBTAG00000002995	ENSBTAG00000002995	1398.1.1	GMPPA	ENSG00000144591	GDP-mannose pyrophosphorylase A [Source:HGNC Symbol;Acc:HGNC:22923]
1399	ENSBTAG00000002997	ENSBTAG00000002997	1399.1.1	ADAMTSL1	ENSG00000178031	ADAMTS like 1 [Source:HGNC Symbol;Acc:HGNC:14632]
1400	ENSBTAG00000002998	ENSBTAG00000002998	1400.1.1	MELTF	ENSG00000163975	melanotransferrin [Source:HGNC Symbol;Acc:HGNC:7037]
1401	ENSBTAG00000002999	ENSBTAG00000002999	1401.1.1	ANAPC15	ENSG00000110200	anaphase promoting complex subunit 15 [Source:HGNC Symbol;Acc:HGNC:24531]
1403	ENSBTAG00000003002	ENSBTAG00000003002	1403.1.1	WDR75	ENSG00000115368	WD repeat domain 75 [Source:HGNC Symbol;Acc:HGNC:25725]
1404	ENSBTAG00000003012	ENSBTAG00000003012	1404.1.1	TRAF1	ENSG00000056558	TNF receptor associated factor 1 [Source:HGNC Symbol;Acc:HGNC:12031]
1405	ENSBTAG00000003014	ENSBTAG00000003014	1405.1.1	TRPV2	ENSG00000187688	transient receptor potential cation channel subfamily V member 2 [Source:HGNC Symbol;Acc:HGNC:18082]
1406	ENSBTAG00000003015	ENSBTAG00000003015	1406.1.1	SESN1	ENSG00000080546	sestrin 1 [Source:HGNC Symbol;Acc:HGNC:21595]
1407	ENSBTAG00000003016	ENSBTAG00000003016	1407.1.1	PTPN7	ENSG00000143851	protein tyrosine phosphatase non-receptor type 7 [Source:HGNC Symbol;Acc:HGNC:9659]
1408	ENSBTAG00000003017	ENSBTAG00000003017	1408.1.1	TTC38	ENSG00000075234	tetratricopeptide repeat domain 38 [Source:HGNC Symbol;Acc:HGNC:26082]
1409	ENSBTAG00000003018	ENSBTAG00000003018	1409.1.1	FSTL3	ENSG00000070404	follistatin like 3 [Source:HGNC Symbol;Acc:HGNC:3973]
1410	ENSBTAG00000003021	ENSBTAG00000003021	1410.1.1	SP1	ENSG00000185591	Sp1 transcription factor [Source:HGNC Symbol;Acc:HGNC:11205]
1411	ENSBTAG00000003025	ENSBTAG00000003025	1411.1.1	NME6	ENSG00000172113	NME/NM23 nucleoside diphosphate kinase 6 [Source:HGNC Symbol;Acc:HGNC:20567]
1412	ENSBTAG00000003033	ENSBTAG00000003033	1412.1.1	GADD45G	ENSG00000130222	growth arrest and DNA damage inducible gamma [Source:HGNC Symbol;Acc:HGNC:4097]
1413	ENSBTAG00000003034	ENSBTAG00000003034	1413.1.1	GATAD2A	ENSG00000167491	GATA zinc finger domain containing 2A [Source:HGNC Symbol;Acc:HGNC:29989]
1414	ENSBTAG00000003035	ENSBTAG00000003035	1414.1.1	IMPACT	ENSG00000154059	impact RWD domain protein [Source:HGNC Symbol;Acc:HGNC:20387]
1415	ENSBTAG00000003036	ENSBTAG00000003036	1415.1.1	PPFIA2	ENSG00000139220	PTPRF interacting protein alpha 2 [Source:HGNC Symbol;Acc:HGNC:9246]
1416	ENSBTAG00000003038	ENSBTAG00000003038	1416.1.1	TAP2	ENSG00000204267	transporter 2, ATP binding cassette subfamily B member [Source:HGNC Symbol;Acc:HGNC:44]
1417	ENSBTAG00000003039	ENSBTAG00000003039	1417.1.1	PSMB8	ENSG00000204264	proteasome 20S subunit beta 8 [Source:HGNC Symbol;Acc:HGNC:9545]
1418	ENSBTAG00000003040	ENSBTAG00000003040	1418.1.1	RALGAPB	ENSG00000170471	Ral GTPase activating protein non-catalytic subunit beta [Source:HGNC Symbol;Acc:HGNC:29221]
1419	ENSBTAG00000003043	ENSBTAG00000003043	1419.1.1	GNG2	ENSG00000186469	G protein subunit gamma 2 [Source:HGNC Symbol;Acc:HGNC:4404]
1420	ENSBTAG00000003044	ENSBTAG00000003044	1420.1.1	SPIN1	ENSG00000106723	spindlin 1 [Source:HGNC Symbol;Acc:HGNC:11243]
1421	ENSBTAG00000003045	ENSBTAG00000003045	1421.1.1	BAMBI	ENSG00000095739	BMP and activin membrane bound inhibitor [Source:HGNC Symbol;Acc:HGNC:30251]
1422	ENSBTAG00000003049	ENSBTAG00000003049	1422.1.1	MICALL2	ENSG00000164877	MICAL like 2 [Source:HGNC Symbol;Acc:HGNC:29672]
1423	ENSBTAG00000003051	ENSBTAG00000003051	1423.1.1	FER	ENSG00000151422	FER tyrosine kinase [Source:HGNC Symbol;Acc:HGNC:3655]
1424	ENSBTAG00000003052	ENSBTAG00000003052	1424.1.1	PCSK7	ENSG00000160613	proprotein convertase subtilisin/kexin type 7 [Source:HGNC Symbol;Acc:HGNC:8748]
1425	ENSBTAG00000003058	ENSBTAG00000003058	1425.1.1	ADRM1	ENSG00000130706	ADRM1 26S proteasome ubiquitin receptor [Source:HGNC Symbol;Acc:HGNC:15759]
1426	ENSBTAG00000003059	ENSBTAG00000003059	1426.1.1	CFAP298	ENSG00000159079	cilia and flagella associated protein 298 [Source:HGNC Symbol;Acc:HGNC:1301]
1427	ENSBTAG00000003061	ENSBTAG00000003061	1427.1.1	LAMA5	ENSG00000130702	laminin subunit alpha 5 [Source:HGNC Symbol;Acc:HGNC:6485]
1428	ENSBTAG00000003062	ENSBTAG00000003062	1428.1.1	FHIP2A	ENSG00000151553	FHF complex subunit HOOK interacting protein 2A [Source:HGNC Symbol;Acc:HGNC:29320]
1429	ENSBTAG00000003063	ENSBTAG00000003063	1429.1.1	SYNJ1	ENSG00000159082	synaptojanin 1 [Source:HGNC Symbol;Acc:HGNC:11503]
1430	ENSBTAG00000003064	ENSBTAG00000003064	1430.1.1	PAXBP1	ENSG00000159086	PAX3 and PAX7 binding protein 1 [Source:HGNC Symbol;Acc:HGNC:13579]
1431	ENSBTAG00000003066	ENSBTAG00000003066	1431.1.1	NSA2	ENSG00000164346	NSA2 ribosome biogenesis factor [Source:HGNC Symbol;Acc:HGNC:30728]
1432	ENSBTAG00000003067	ENSBTAG00000003067	1432.1.1	PSMB7	ENSG00000136930	proteasome 20S subunit beta 7 [Source:HGNC Symbol;Acc:HGNC:9544]
1433	ENSBTAG00000003068	ENSBTAG00000003068	1433.1.1	MSMO1	ENSG00000052802	methylsterol monooxygenase 1 [Source:HGNC Symbol;Acc:HGNC:10545]
1434	ENSBTAG00000003069	ENSBTAG00000003069	1434.1.1	MAN1C1	ENSG00000117643	mannosidase alpha class 1C member 1 [Source:HGNC Symbol;Acc:HGNC:19080]
1435	ENSBTAG00000003072	ENSBTAG00000003072	1435.1.1	ACADVL	ENSG00000072778	acyl-CoA dehydrogenase very long chain [Source:HGNC Symbol;Acc:HGNC:92]
1436	ENSBTAG00000003073	ENSBTAG00000003073	1436.1.1	NAA40	ENSG00000110583	N-alpha-acetyltransferase 40, NatD catalytic subunit [Source:HGNC Symbol;Acc:HGNC:25845]
1437	ENSBTAG00000003074	ENSBTAG00000003074	1437.1.1	SLC16A6	ENSG00000108932	solute carrier family 16 member 6 [Source:HGNC Symbol;Acc:HGNC:10927]
1438	ENSBTAG00000003075	ENSBTAG00000003075	1438.1.1	DVL2	ENSG00000004975	dishevelled segment polarity protein 2 [Source:HGNC Symbol;Acc:HGNC:3086]
1439	ENSBTAG00000003076	ENSBTAG00000003076	1439.1.1	NT5DC1	ENSG00000178425	5'-nucleotidase domain containing 1 [Source:HGNC Symbol;Acc:HGNC:21556]
1440	ENSBTAG00000003077	ENSBTAG00000003077	1440.1.1	DPF2	ENSG00000133884	double PHD fingers 2 [Source:HGNC Symbol;Acc:HGNC:9964]
1441	ENSBTAG00000003078	ENSBTAG00000003078	1441.1.1	COL10A1	ENSG00000123500	collagen type X alpha 1 chain [Source:HGNC Symbol;Acc:HGNC:2185]
1442	ENSBTAG00000003081	ENSBTAG00000003081	1442.1.1	RWDD4	ENSG00000182552	RWD domain containing 4 [Source:HGNC Symbol;Acc:HGNC:23750]
1443	ENSBTAG00000003083	ENSBTAG00000003083	1443.1.1	SLC50A1	ENSG00000169241	solute carrier family 50 member 1 [Source:HGNC Symbol;Acc:HGNC:30657]
1445	ENSBTAG00000003087	ENSBTAG00000003087	1445.1.1	DCUN1D5	ENSG00000137692	defective in cullin neddylation 1 domain containing 5 [Source:HGNC Symbol;Acc:HGNC:28409]
1446	ENSBTAG00000003089	ENSBTAG00000003089	1446.1.1	RHPN2	ENSG00000131941	rhophilin Rho GTPase binding protein 2 [Source:HGNC Symbol;Acc:HGNC:19974]
1447	ENSBTAG00000003090	ENSBTAG00000003090	1447.1.1	LRRC9	ENSG00000131951	leucine rich repeat containing 9 [Source:HGNC Symbol;Acc:HGNC:19848]
1448	ENSBTAG00000003092	ENSBTAG00000003092	1448.1.1	ANAPC5	ENSG00000089053	anaphase promoting complex subunit 5 [Source:HGNC Symbol;Acc:HGNC:15713]
1449	ENSBTAG00000003094	ENSBTAG00000003094	1449.1.1	SART1	ENSG00000175467	spliceosome associated factor 1, recruiter of U4/U6.U5 tri-snRNP [Source:HGNC Symbol;Acc:HGNC:10538]
1450	ENSBTAG00000003097	ENSBTAG00000003097	1450.1.1	DENND4C	ENSG00000137145	DENN domain containing 4C [Source:HGNC Symbol;Acc:HGNC:26079]
1451	ENSBTAG00000003098	ENSBTAG00000003098	1451.1.1	MTDH	ENSG00000147649	metadherin [Source:HGNC Symbol;Acc:HGNC:29608]
1452	ENSBTAG00000003100	ENSBTAG00000003100	1452.1.1	SMTN	ENSG00000183963	smoothelin [Source:HGNC Symbol;Acc:HGNC:11126]
1453	ENSBTAG00000003102	ENSBTAG00000003102	1453.1.1	GCC1	ENSG00000179562	GRIP and coiled-coil domain containing 1 [Source:HGNC Symbol;Acc:HGNC:19095]
1454	ENSBTAG00000003109	ENSBTAG00000003109	1454.1.1	ITM2B	ENSG00000136156	integral membrane protein 2B [Source:HGNC Symbol;Acc:HGNC:6174]
1455	ENSBTAG00000003111	ENSBTAG00000003111	1455.1.1	ATM	ENSG00000149311	ATM serine/threonine kinase [Source:HGNC Symbol;Acc:HGNC:795]
1456	ENSBTAG00000003112	ENSBTAG00000003112	1456.1.1	THUMPD3	ENSG00000134077	THUMP domain containing 3 [Source:HGNC Symbol;Acc:HGNC:24493]
1457	ENSBTAG00000003114	ENSBTAG00000003114	1457.1.1	AVL9	ENSG00000105778	AVL9 cell migration associated [Source:HGNC Symbol;Acc:HGNC:28994]
1458	ENSBTAG00000003115	ENSBTAG00000003115	1458.1.1	KBTBD2	ENSG00000170852	kelch repeat and BTB domain containing 2 [Source:HGNC Symbol;Acc:HGNC:21751]
1459	ENSBTAG00000003116	ENSBTAG00000003116	1459.1.1	MTMR6	ENSG00000139505	myotubularin related protein 6 [Source:HGNC Symbol;Acc:HGNC:7453]
1460	ENSBTAG00000003124	ENSBTAG00000003124	1460.1.1	MFSD14B	ENSG00000148110	major facilitator superfamily domain containing 14B [Source:HGNC Symbol;Acc:HGNC:23376]
1461	ENSBTAG00000003126	ENSBTAG00000003126	1461.1.1	PEX16	ENSG00000121680	peroxisomal biogenesis factor 16 [Source:HGNC Symbol;Acc:HGNC:8857]
1462	ENSBTAG00000003128	ENSBTAG00000003128	1462.1.1	SPATA6	ENSG00000132122	spermatogenesis associated 6 [Source:HGNC Symbol;Acc:HGNC:18309]
1463	ENSBTAG00000003130	ENSBTAG00000003130	1463.1.1	CHRNA3	ENSG00000080644	cholinergic receptor nicotinic alpha 3 subunit [Source:HGNC Symbol;Acc:HGNC:1957]
1464	ENSBTAG00000003137	ENSBTAG00000003137	1464.1.1	PLPPR1	ENSG00000148123	phospholipid phosphatase related 1 [Source:HGNC Symbol;Acc:HGNC:25993]
1465	ENSBTAG00000003143	ENSBTAG00000003143	1465.1.1	TBCCD1	ENSG00000113838	TBCC domain containing 1 [Source:HGNC Symbol;Acc:HGNC:25546]
1467	ENSBTAG00000003147	ENSBTAG00000003147	1467.1.1	JAK1	ENSG00000162434	Janus kinase 1 [Source:HGNC Symbol;Acc:HGNC:6190]
1468	ENSBTAG00000003148	ENSBTAG00000003148	1468.1.1	MCM3AP	ENSG00000160294	minichromosome maintenance complex component 3 associated protein [Source:HGNC Symbol;Acc:HGNC:6946]
1469	ENSBTAG00000003151	ENSBTAG00000003151	1469.1.1	DNAJB11	ENSG00000090520	DnaJ heat shock protein family (Hsp40) member B11 [Source:HGNC Symbol;Acc:HGNC:14889]
1470	ENSBTAG00000003152	ENSBTAG00000003152	1470.1.1	IFI27L2	ENSG00000119632	interferon alpha inducible protein 27 like 2 [Source:HGNC Symbol;Acc:HGNC:19753]
1472	ENSBTAG00000003160	ENSBTAG00000003160	1472.1.1	LRCH4	ENSG00000077454	leucine rich repeats and calponin homology domain containing 4 [Source:HGNC Symbol;Acc:HGNC:6691]
1473	ENSBTAG00000003161	ENSBTAG00000003161	1473.1.1	YBEY	ENSG00000182362	ybeY metalloendoribonuclease [Source:HGNC Symbol;Acc:HGNC:1299]
1474	ENSBTAG00000003162	ENSBTAG00000003162	1474.1.1	CRYZ	ENSG00000116791	crystallin zeta [Source:HGNC Symbol;Acc:HGNC:2419]
1475	ENSBTAG00000003163	ENSBTAG00000003163	1475.1.1	RBBP8NL	ENSG00000130701	RBBP8 N-terminal like [Source:HGNC Symbol;Acc:HGNC:16144]
1476	ENSBTAG00000003165	ENSBTAG00000003165	1476.1.1	ADAMTS9	ENSG00000163638	ADAM metallopeptidase with thrombospondin type 1 motif 9 [Source:HGNC Symbol;Acc:HGNC:13202]
1477	ENSBTAG00000003166	ENSBTAG00000003166	1477.1.1	AXL	ENSG00000167601	AXL receptor tyrosine kinase [Source:HGNC Symbol;Acc:HGNC:905]
1478	ENSBTAG00000003168	ENSBTAG00000003168	1478.1.1	HNRNPUL1	ENSG00000105323	heterogeneous nuclear ribonucleoprotein U like 1 [Source:HGNC Symbol;Acc:HGNC:17011]
1479	ENSBTAG00000003169	ENSBTAG00000003169	1479.1.1	FBXO24	ENSG00000106336	F-box protein 24 [Source:HGNC Symbol;Acc:HGNC:13595]
1480	ENSBTAG00000003171	ENSBTAG00000003171	1480.1.1	SHANK2	ENSG00000162105	SH3 and multiple ankyrin repeat domains 2 [Source:HGNC Symbol;Acc:HGNC:14295]
1482	ENSBTAG00000003174	ENSBTAG00000003174	1482.1.1	NDUFAF4	ENSG00000123545	NADH:ubiquinone oxidoreductase complex assembly factor 4 [Source:HGNC Symbol;Acc:HGNC:21034]
1483	ENSBTAG00000003176	ENSBTAG00000003176	1483.1.1	JAM3	ENSG00000166086	junctional adhesion molecule 3 [Source:HGNC Symbol;Acc:HGNC:15532]
1484	ENSBTAG00000003177	ENSBTAG00000003177	1484.1.1	SLC25A33	ENSG00000171612	solute carrier family 25 member 33 [Source:HGNC Symbol;Acc:HGNC:29681]
1485	ENSBTAG00000003178	ENSBTAG00000003178	1485.1.1	ATE1	ENSG00000107669	arginyltransferase 1 [Source:HGNC Symbol;Acc:HGNC:782]
1486	ENSBTAG00000003180	ENSBTAG00000003180	1486.1.1	TMEM201	ENSG00000188807	transmembrane protein 201 [Source:HGNC Symbol;Acc:HGNC:33719]
1487	ENSBTAG00000003183	ENSBTAG00000003183	1487.1.1	NTN4	ENSG00000074527	netrin 4 [Source:HGNC Symbol;Acc:HGNC:13658]
1488	ENSBTAG00000003185	ENSBTAG00000003185	1488.1.1	ASAP1	ENSG00000153317	ArfGAP with SH3 domain, ankyrin repeat and PH domain 1 [Source:HGNC Symbol;Acc:HGNC:2720]
1489	ENSBTAG00000003186	ENSBTAG00000003186	1489.1.1	OTULIN	ENSG00000154124	OTU deubiquitinase with linear linkage specificity [Source:HGNC Symbol;Acc:HGNC:25118]
1490	ENSBTAG00000003189	ENSBTAG00000003189	1490.1.1	CCDC6	ENSG00000108091	coiled-coil domain containing 6 [Source:HGNC Symbol;Acc:HGNC:18782]
1491	ENSBTAG00000003191	ENSBTAG00000003191	1491.1.1	FSCN1	ENSG00000075618	fascin actin-bundling protein 1 [Source:HGNC Symbol;Acc:HGNC:11148]
1492	ENSBTAG00000003192	ENSBTAG00000003192	1492.1.1	TBC1D16	ENSG00000167291	TBC1 domain family member 16 [Source:HGNC Symbol;Acc:HGNC:28356]
1494	ENSBTAG00000003196	ENSBTAG00000003196	1494.1.1	PAPSS2	ENSG00000198682	3'-phosphoadenosine 5'-phosphosulfate synthase 2 [Source:HGNC Symbol;Acc:HGNC:8604]
1495	ENSBTAG00000003199	ENSBTAG00000003199	1495.1.1	SLC35C1	ENSG00000181830	solute carrier family 35 member C1 [Source:HGNC Symbol;Acc:HGNC:20197]
1496	ENSBTAG00000003201	ENSBTAG00000003201	1496.1.1	FNTA	ENSG00000168522	farnesyltransferase, CAAX box, subunit alpha [Source:HGNC Symbol;Acc:HGNC:3782]
1497	ENSBTAG00000003205	ENSBTAG00000003205	1497.1.1	RPL35	ENSG00000136942	ribosomal protein L35 [Source:HGNC Symbol;Acc:HGNC:10344]
1498	ENSBTAG00000003208	ENSBTAG00000003208	1498.1.1	RAB33B	ENSG00000172007	RAB33B, member RAS oncogene family [Source:HGNC Symbol;Acc:HGNC:16075]
1499	ENSBTAG00000003209	ENSBTAG00000003209	1499.1.1	BLCAP	ENSG00000166619	BLCAP apoptosis inducing factor [Source:HGNC Symbol;Acc:HGNC:1055]
1500	ENSBTAG00000003212	ENSBTAG00000003212	1500.1.1	NNAT	ENSG00000053438	neuronatin [Source:HGNC Symbol;Acc:HGNC:7860]
1501	ENSBTAG00000003215	ENSBTAG00000003215	1501.1.1	KIF3B	ENSG00000101350	kinesin family member 3B [Source:HGNC Symbol;Acc:HGNC:6320]
1502	ENSBTAG00000003217	ENSBTAG00000003217	1502.1.1	CADM3	ENSG00000162706	cell adhesion molecule 3 [Source:HGNC Symbol;Acc:HGNC:17601]
1503	ENSBTAG00000003218	ENSBTAG00000003218	1503.1.1	RAB28	ENSG00000157869	RAB28, member RAS oncogene family [Source:HGNC Symbol;Acc:HGNC:9768]
1504	ENSBTAG00000003219	ENSBTAG00000003219	1504.1.1	FBXL7	ENSG00000183580	F-box and leucine rich repeat protein 7 [Source:HGNC Symbol;Acc:HGNC:13604]
1505	ENSBTAG00000003220	ENSBTAG00000003220	1505.1.1	ACKR1	ENSG00000213088	atypical chemokine receptor 1 (Duffy blood group) [Source:HGNC Symbol;Acc:HGNC:4035]
1506	ENSBTAG00000003221	ENSBTAG00000003221	1506.1.1	ATF7IP	ENSG00000171681	activating transcription factor 7 interacting protein [Source:HGNC Symbol;Acc:HGNC:20092]
1507	ENSBTAG00000003222	ENSBTAG00000003222	1507.1.1	ASNS	ENSG00000070669	asparagine synthetase (glutamine-hydrolyzing) [Source:HGNC Symbol;Acc:HGNC:753]
1508	ENSBTAG00000003225	ENSBTAG00000003225	1508.1.1	IMP4	ENSG00000136718	IMP U3 small nucleolar ribonucleoprotein 4 [Source:HGNC Symbol;Acc:HGNC:30856]
1509	ENSBTAG00000003228	ENSBTAG00000003228	1509.1.1	RPL3	ENSG00000100316	ribosomal protein L3 [Source:HGNC Symbol;Acc:HGNC:10332]
1511	ENSBTAG00000003232	ENSBTAG00000003232	1511.1.1	RAB29	ENSG00000117280	RAB29, member RAS oncogene family [Source:HGNC Symbol;Acc:HGNC:9789]
1512	ENSBTAG00000003235	ENSBTAG00000003235	1512.1.1	DHDDS	ENSG00000117682	dehydrodolichyl diphosphate synthase subunit [Source:HGNC Symbol;Acc:HGNC:20603]
1513	ENSBTAG00000003237	ENSBTAG00000003237	1513.1.1	IQSEC1	ENSG00000144711	IQ motif and Sec7 domain ArfGEF 1 [Source:HGNC Symbol;Acc:HGNC:29112]
1514	ENSBTAG00000003238	ENSBTAG00000003238	1514.1.1	MEOX2	ENSG00000106511	mesenchyme homeobox 2 [Source:HGNC Symbol;Acc:HGNC:7014]
1515	ENSBTAG00000003239	ENSBTAG00000003239	1515.1.1	UTP20	ENSG00000120800	UTP20 small subunit processome component [Source:HGNC Symbol;Acc:HGNC:17897]
1516	ENSBTAG00000003240	ENSBTAG00000003240	1516.1.1	C9orf152	ENSG00000188959	chromosome 9 open reading frame 152 [Source:HGNC Symbol;Acc:HGNC:31455]
1517	ENSBTAG00000003242	ENSBTAG00000003242	1517.1.1	ACAD9	ENSG00000177646	acyl-CoA dehydrogenase family member 9 [Source:HGNC Symbol;Acc:HGNC:21497]
1518	ENSBTAG00000003245	ENSBTAG00000003245	1518.1.1	BCAR3	ENSG00000137936	BCAR3 adaptor protein, NSP family member [Source:HGNC Symbol;Acc:HGNC:973]
1519	ENSBTAG00000003255	ENSBTAG00000003255	1519.1.1	CD4	ENSG00000010610	CD4 molecule [Source:HGNC Symbol;Acc:HGNC:1678]
1520	ENSBTAG00000003256	ENSBTAG00000003256	1520.1.1	TOMM34	ENSG00000025772	translocase of outer mitochondrial membrane 34 [Source:HGNC Symbol;Acc:HGNC:15746]
1521	ENSBTAG00000003257	ENSBTAG00000003257	1521.1.1	STK4	ENSG00000101109	serine/threonine kinase 4 [Source:HGNC Symbol;Acc:HGNC:11408]
1522	ENSBTAG00000003259	ENSBTAG00000003259	1522.1.1	TCERG1	ENSG00000113649	transcription elongation regulator 1 [Source:HGNC Symbol;Acc:HGNC:15630]
1523	ENSBTAG00000003260	ENSBTAG00000003260	1523.1.1	GPR151	ENSG00000173250	G protein-coupled receptor 151 [Source:HGNC Symbol;Acc:HGNC:23624]
1525	ENSBTAG00000003263	ENSBTAG00000003263	1525.1.1	TBCA	ENSG00000171530	tubulin folding cofactor A [Source:HGNC Symbol;Acc:HGNC:11579]
1526	ENSBTAG00000003264	ENSBTAG00000003264	1526.1.1	NR1H2	ENSG00000131408	nuclear receptor subfamily 1 group H member 2 [Source:HGNC Symbol;Acc:HGNC:7965]
1527	ENSBTAG00000003265	ENSBTAG00000003265	1527.1.1	ADD3	ENSG00000148700	adducin 3 [Source:HGNC Symbol;Acc:HGNC:245]
1528	ENSBTAG00000003267	ENSBTAG00000003267	1528.1.1	ZNF132	ENSG00000131849	zinc finger protein 132 [Source:HGNC Symbol;Acc:HGNC:12916]
1530	ENSBTAG00000003276	ENSBTAG00000003276	1530.1.1	PRKCH	ENSG00000027075	protein kinase C eta [Source:HGNC Symbol;Acc:HGNC:9403]
1531	ENSBTAG00000003278	ENSBTAG00000003278	1531.1.1	HOXC10	ENSG00000180818	homeobox C10 [Source:HGNC Symbol;Acc:HGNC:5122]
1532	ENSBTAG00000003279	ENSBTAG00000003279	1532.1.1	NDUFA10	ENSG00000130414	NADH:ubiquinone oxidoreductase subunit A10 [Source:HGNC Symbol;Acc:HGNC:7684]
1533	ENSBTAG00000003282	ENSBTAG00000003282	1533.1.1	SLCO1A2	ENSG00000084453	solute carrier organic anion transporter family member 1A2 [Source:HGNC Symbol;Acc:HGNC:10956]
1534	ENSBTAG00000003288	ENSBTAG00000003288	1534.1.1	CCZ1	ENSG00000122674	CCZ1 homolog, vacuolar protein trafficking and biogenesis associated [Source:HGNC Symbol;Acc:HGNC:21691]
1534	ENSBTAG00000003288	ENSBTAG00000003288	1534.1.2	CCZ1B	ENSG00000146574	CCZ1 homolog B, vacuolar protein trafficking and biogenesis associated [Source:HGNC Symbol;Acc:HGNC:21717]
1535	ENSBTAG00000003291	ENSBTAG00000003291	1535.1.1	RIMKLB	ENSG00000166532	ribosomal modification protein rimK like family member B [Source:HGNC Symbol;Acc:HGNC:29228]
1536	ENSBTAG00000003294	ENSBTAG00000003294	1536.1.1	MRPL43	ENSG00000055950	mitochondrial ribosomal protein L43 [Source:HGNC Symbol;Acc:HGNC:14517]
1537	ENSBTAG00000003295	ENSBTAG00000003295	1537.1.1	GORAB	ENSG00000120370	golgin, RAB6 interacting [Source:HGNC Symbol;Acc:HGNC:25676]
1538	ENSBTAG00000003296	ENSBTAG00000003296	1538.1.1	TWNK	ENSG00000107815	twinkle mtDNA helicase [Source:HGNC Symbol;Acc:HGNC:1160]
1539	ENSBTAG00000003297	ENSBTAG00000003297	1539.1.1	OASL	ENSG00000135114	2'-5'-oligoadenylate synthetase like [Source:HGNC Symbol;Acc:HGNC:8090]
1540	ENSBTAG00000003298	ENSBTAG00000003298	1540.1.1	LZTS2	ENSG00000107816	leucine zipper tumor suppressor 2 [Source:HGNC Symbol;Acc:HGNC:29381]
1541	ENSBTAG00000003300	ENSBTAG00000003300	1541.1.1	MFGE8	ENSG00000140545	milk fat globule EGF and factor V/VIII domain containing [Source:HGNC Symbol;Acc:HGNC:7036]
1542	ENSBTAG00000003301	ENSBTAG00000003301	1542.1.1	NCAM2	ENSG00000154654	neural cell adhesion molecule 2 [Source:HGNC Symbol;Acc:HGNC:7657]
1543	ENSBTAG00000003303	ENSBTAG00000003303	1543.1.1	MRPL58	ENSG00000167862	mitochondrial ribosomal protein L58 [Source:HGNC Symbol;Acc:HGNC:5359]
1544	ENSBTAG00000003304	ENSBTAG00000003304	1544.1.1	HOXC4	ENSG00000198353	homeobox C4 [Source:HGNC Symbol;Acc:HGNC:5126]
1545	ENSBTAG00000003305	ENSBTAG00000003305	1545.1.1	NCF1	ENSG00000158517	neutrophil cytosolic factor 1 [Source:HGNC Symbol;Acc:HGNC:7660]
1546	ENSBTAG00000003307	ENSBTAG00000003307	1546.1.1	IMMT	ENSG00000132305	inner membrane mitochondrial protein [Source:HGNC Symbol;Acc:HGNC:6047]
1547	ENSBTAG00000003312	ENSBTAG00000003312	1547.1.1	CHST15	ENSG00000182022	carbohydrate sulfotransferase 15 [Source:HGNC Symbol;Acc:HGNC:18137]
1548	ENSBTAG00000003314	ENSBTAG00000003314	1548.1.1	SKA3	ENSG00000165480	spindle and kinetochore associated complex subunit 3 [Source:HGNC Symbol;Acc:HGNC:20262]
1550	ENSBTAG00000003319	ENSBTAG00000003319	1550.1.1	FLRT3	ENSG00000125848	fibronectin leucine rich transmembrane protein 3 [Source:HGNC Symbol;Acc:HGNC:3762]
1551	ENSBTAG00000003322	ENSBTAG00000003322	1551.1.1	TTLL7	ENSG00000137941	tubulin tyrosine ligase like 7 [Source:HGNC Symbol;Acc:HGNC:26242]
1552	ENSBTAG00000003323	ENSBTAG00000003323	1552.1.1	NOL6	ENSG00000165271	nucleolar protein 6 [Source:HGNC Symbol;Acc:HGNC:19910]
1553	ENSBTAG00000003325	ENSBTAG00000003325	1553.1.1	SNRK	ENSG00000163788	SNF related kinase [Source:HGNC Symbol;Acc:HGNC:30598]
1554	ENSBTAG00000003326	ENSBTAG00000003326	1554.1.1	NAIP	ENSG00000249437	NLR family apoptosis inhibitory protein [Source:HGNC Symbol;Acc:HGNC:7634]
1555	ENSBTAG00000003328	ENSBTAG00000003328	1555.1.1	TAMM41	ENSG00000144559	TAM41 mitochondrial translocator assembly and maintenance homolog [Source:HGNC Symbol;Acc:HGNC:25187]
1556	ENSBTAG00000003329	ENSBTAG00000003329	1556.1.1	FST	ENSG00000134363	follistatin [Source:HGNC Symbol;Acc:HGNC:3971]
1557	ENSBTAG00000003330	ENSBTAG00000003330	1557.1.1	ATL3	ENSG00000184743	atlastin GTPase 3 [Source:HGNC Symbol;Acc:HGNC:24526]
1558	ENSBTAG00000003332	ENSBTAG00000003332	1558.1.1	RPP40	ENSG00000124787	ribonuclease P/MRP subunit p40 [Source:HGNC Symbol;Acc:HGNC:20992]
1559	ENSBTAG00000003334	ENSBTAG00000003334	1559.1.1	ADAP2	ENSG00000184060	ArfGAP with dual PH domains 2 [Source:HGNC Symbol;Acc:HGNC:16487]
1560	ENSBTAG00000003336	ENSBTAG00000003336	1560.1.1	TPD52L1	ENSG00000111907	TPD52 like 1 [Source:HGNC Symbol;Acc:HGNC:12006]
1561	ENSBTAG00000003338	ENSBTAG00000003338	1561.1.1	LRRCC1	ENSG00000133739	leucine rich repeat and coiled-coil centrosomal protein 1 [Source:HGNC Symbol;Acc:HGNC:29373]
1562	ENSBTAG00000003339	ENSBTAG00000003339	1562.1.1	ZBTB10	ENSG00000205189	zinc finger and BTB domain containing 10 [Source:HGNC Symbol;Acc:HGNC:30953]
1563	ENSBTAG00000003340	ENSBTAG00000003340	1563.1.1	HDDC2	ENSG00000111906	HD domain containing 2 [Source:HGNC Symbol;Acc:HGNC:21078]
1564	ENSBTAG00000003341	ENSBTAG00000003341	1564.1.1	DOK2	ENSG00000147443	docking protein 2 [Source:HGNC Symbol;Acc:HGNC:2991]
1565	ENSBTAG00000003342	ENSBTAG00000003342	1565.1.1	AMD1	ENSG00000123505	adenosylmethionine decarboxylase 1 [Source:HGNC Symbol;Acc:HGNC:457]
1566	ENSBTAG00000003345	ENSBTAG00000003345	1566.1.1	FAT4	ENSG00000196159	FAT atypical cadherin 4 [Source:HGNC Symbol;Acc:HGNC:23109]
1567	ENSBTAG00000003354	ENSBTAG00000003354	1567.1.1	SMCHD1	ENSG00000101596	structural maintenance of chromosomes flexible hinge domain containing 1 [Source:HGNC Symbol;Acc:HGNC:29090]
1568	ENSBTAG00000003358	ENSBTAG00000003358	1568.1.1	MCFD2	ENSG00000180398	multiple coagulation factor deficiency 2, ER cargo receptor complex subunit [Source:HGNC Symbol;Acc:HGNC:18451]
1569	ENSBTAG00000003359	ENSBTAG00000003359	1569.1.1	ELOVL5	ENSG00000012660	ELOVL fatty acid elongase 5 [Source:HGNC Symbol;Acc:HGNC:21308]
1570	ENSBTAG00000003361	ENSBTAG00000003361	1570.1.1	METTL15	ENSG00000169519	methyltransferase 15, mitochondrial 12S rRNA N4-cytidine [Source:HGNC Symbol;Acc:HGNC:26606]
1571	ENSBTAG00000003362	ENSBTAG00000003362	1571.1.1	HSP90B1	ENSG00000166598	heat shock protein 90 beta family member 1 [Source:HGNC Symbol;Acc:HGNC:12028]
1572	ENSBTAG00000003365	ENSBTAG00000003365	1572.1.1	SMG8	ENSG00000167447	SMG8 nonsense mediated mRNA decay factor [Source:HGNC Symbol;Acc:HGNC:25551]
1573	ENSBTAG00000003366	ENSBTAG00000003366	1573.1.1	RIGI	ENSG00000107201	RNA sensor RIG-I [Source:HGNC Symbol;Acc:HGNC:19102]
1574	ENSBTAG00000003371	ENSBTAG00000003371	1574.1.1	JKAMP	ENSG00000050130	JNK1/MAPK8 associated membrane protein [Source:HGNC Symbol;Acc:HGNC:20184]
1575	ENSBTAG00000003372	ENSBTAG00000003372	1575.1.1	SLC35B4	ENSG00000205060	solute carrier family 35 member B4 [Source:HGNC Symbol;Acc:HGNC:20584]
1576	ENSBTAG00000003375	ENSBTAG00000003375	1576.1.1	TC2N	ENSG00000165929	tandem C2 domains, nuclear [Source:HGNC Symbol;Acc:HGNC:19859]
1577	ENSBTAG00000003376	ENSBTAG00000003376	1577.1.1	ASB1	ENSG00000065802	ankyrin repeat and SOCS box containing 1 [Source:HGNC Symbol;Acc:HGNC:16011]
1579	ENSBTAG00000003382	ENSBTAG00000003382	1579.1.1	RIMS4	ENSG00000101098	regulating synaptic membrane exocytosis 4 [Source:HGNC Symbol;Acc:HGNC:16183]
1580	ENSBTAG00000003384	ENSBTAG00000003384	1580.1.1	CEP162	ENSG00000135315	centrosomal protein 162 [Source:HGNC Symbol;Acc:HGNC:21107]
1581	ENSBTAG00000003388	ENSBTAG00000003388	1581.1.1	DPM2	ENSG00000136908	dolichyl-phosphate mannosyltransferase subunit 2, regulatory [Source:HGNC Symbol;Acc:HGNC:3006]
1582	ENSBTAG00000003390	ENSBTAG00000003390	1582.1.1	SF3A1	ENSG00000099995	splicing factor 3a subunit 1 [Source:HGNC Symbol;Acc:HGNC:10765]
1583	ENSBTAG00000003393	ENSBTAG00000003393	1583.1.1	CCDC157	ENSG00000187860	coiled-coil domain containing 157 [Source:HGNC Symbol;Acc:HGNC:33854]
1584	ENSBTAG00000003394	ENSBTAG00000003394	1584.1.1	RNF215	ENSG00000099999	ring finger protein 215 [Source:HGNC Symbol;Acc:HGNC:33434]
1585	ENSBTAG00000003395	ENSBTAG00000003395	1585.1.1	ZRANB1	ENSG00000019995	zinc finger RANBP2-type containing 1 [Source:HGNC Symbol;Acc:HGNC:18224]
1586	ENSBTAG00000003396	ENSBTAG00000003396	1586.1.1	MAFB	ENSG00000204103	MAF bZIP transcription factor B [Source:HGNC Symbol;Acc:HGNC:6408]
1587	ENSBTAG00000003397	ENSBTAG00000003397	1587.1.1	CTBP2	ENSG00000175029	C-terminal binding protein 2 [Source:HGNC Symbol;Acc:HGNC:2495]
1588	ENSBTAG00000003399	ENSBTAG00000003399	1588.1.1	SMARCA5	ENSG00000153147	SWI/SNF related, matrix associated, actin dependent regulator of chromatin, subfamily a, member 5 [Source:HGNC Symbol;Acc:HGNC:11101]
1589	ENSBTAG00000003401	ENSBTAG00000003401	1589.1.1	ACTR3	ENSG00000115091	actin related protein 3 [Source:HGNC Symbol;Acc:HGNC:170]
1590	ENSBTAG00000003403	ENSBTAG00000003403	1590.1.1	PADI2	ENSG00000117115	peptidyl arginine deiminase 2 [Source:HGNC Symbol;Acc:HGNC:18341]
1591	ENSBTAG00000003405	ENSBTAG00000003405	1591.1.1	TP53I3	ENSG00000115129	tumor protein p53 inducible protein 3 [Source:HGNC Symbol;Acc:HGNC:19373]
1592	ENSBTAG00000003407	ENSBTAG00000003407	1592.1.1	SF3B6	ENSG00000115128	splicing factor 3b subunit 6 [Source:HGNC Symbol;Acc:HGNC:30096]
1594	ENSBTAG00000003410	ENSBTAG00000003410	1594.1.1	EFL1	ENSG00000140598	elongation factor like GTPase 1 [Source:HGNC Symbol;Acc:HGNC:25789]
1595	ENSBTAG00000003415	ENSBTAG00000003415	1595.1.1	ESD	ENSG00000139684	esterase D [Source:HGNC Symbol;Acc:HGNC:3465]
1596	ENSBTAG00000003417	ENSBTAG00000003417	1596.1.1	PHKG2	ENSG00000156873	phosphorylase kinase catalytic subunit gamma 2 [Source:HGNC Symbol;Acc:HGNC:8931]
1597	ENSBTAG00000003419	ENSBTAG00000003419	1597.1.1	EAPP	ENSG00000129518	E2F associated phosphoprotein [Source:HGNC Symbol;Acc:HGNC:19312]
1598	ENSBTAG00000003421	ENSBTAG00000003421	1598.1.1	RNF40	ENSG00000103549	ring finger protein 40 [Source:HGNC Symbol;Acc:HGNC:16867]
1599	ENSBTAG00000003422	ENSBTAG00000003422	1599.1.1	SNX5	ENSG00000089006	sorting nexin 5 [Source:HGNC Symbol;Acc:HGNC:14969]
1600	ENSBTAG00000003423	ENSBTAG00000003423	1600.1.1	DDX24	ENSG00000089737	DEAD-box helicase 24 [Source:HGNC Symbol;Acc:HGNC:13266]
1601	ENSBTAG00000003424	ENSBTAG00000003424	1601.1.1	BET1	ENSG00000105829	Bet1 golgi vesicular membrane trafficking protein [Source:HGNC Symbol;Acc:HGNC:14562]
1602	ENSBTAG00000003425	ENSBTAG00000003425	1602.1.1	MGME1	ENSG00000125871	mitochondrial genome maintenance exonuclease 1 [Source:HGNC Symbol;Acc:HGNC:16205]
1603	ENSBTAG00000003434	ENSBTAG00000003434	1603.1.1	CERS4	ENSG00000090661	ceramide synthase 4 [Source:HGNC Symbol;Acc:HGNC:23747]
1604	ENSBTAG00000003436	ENSBTAG00000003436	1604.1.1	RHBDF2	ENSG00000129667	rhomboid 5 homolog 2 [Source:HGNC Symbol;Acc:HGNC:20788]
1605	ENSBTAG00000003438	ENSBTAG00000003438	1605.1.1	ZBTB43	ENSG00000169155	zinc finger and BTB domain containing 43 [Source:HGNC Symbol;Acc:HGNC:17908]
1606	ENSBTAG00000003439	ENSBTAG00000003439	1606.1.1	AKAP10	ENSG00000108599	A-kinase anchoring protein 10 [Source:HGNC Symbol;Acc:HGNC:368]
1607	ENSBTAG00000003440	ENSBTAG00000003440	1607.1.1	FRRS1	ENSG00000156869	ferric chelate reductase 1 [Source:HGNC Symbol;Acc:HGNC:27622]
1608	ENSBTAG00000003443	ENSBTAG00000003443	1608.1.1	USP46	ENSG00000109189	ubiquitin specific peptidase 46 [Source:HGNC Symbol;Acc:HGNC:20075]
1609	ENSBTAG00000003444	ENSBTAG00000003444	1609.1.1	SYDE2	ENSG00000097096	synapse defective Rho GTPase homolog 2 [Source:HGNC Symbol;Acc:HGNC:25841]
1610	ENSBTAG00000003446	ENSBTAG00000003446	1610.1.1	EPHB4	ENSG00000196411	EPH receptor B4 [Source:HGNC Symbol;Acc:HGNC:3395]
1611	ENSBTAG00000003450	ENSBTAG00000003450	1611.1.1	ATP6V1H	ENSG00000047249	ATPase H+ transporting V1 subunit H [Source:HGNC Symbol;Acc:HGNC:18303]
1612	ENSBTAG00000003454	ENSBTAG00000003454	1612.1.1	RGS20	ENSG00000147509	regulator of G protein signaling 20 [Source:HGNC Symbol;Acc:HGNC:14600]
1613	ENSBTAG00000003455	ENSBTAG00000003455	1613.1.1	ANKRD6	ENSG00000135299	ankyrin repeat domain 6 [Source:HGNC Symbol;Acc:HGNC:17280]
1615	ENSBTAG00000003457	ENSBTAG00000003457	1615.1.1	ATF5	ENSG00000169136	activating transcription factor 5 [Source:HGNC Symbol;Acc:HGNC:790]
1616	ENSBTAG00000003458	ENSBTAG00000003458	1616.1.1	CDCA7	ENSG00000144354	cell division cycle associated 7 [Source:HGNC Symbol;Acc:HGNC:14628]
1617	ENSBTAG00000003460	ENSBTAG00000003460	1617.1.1	TCEA1	ENSG00000187735	transcription elongation factor A1 [Source:HGNC Symbol;Acc:HGNC:11612]
1618	ENSBTAG00000003462	ENSBTAG00000003462	1618.1.1	ZNF135	ENSG00000176293	zinc finger protein 135 [Source:HGNC Symbol;Acc:HGNC:12919]
1619	ENSBTAG00000003465	ENSBTAG00000003465	1619.1.1	ZNF329	ENSG00000181894	zinc finger protein 329 [Source:HGNC Symbol;Acc:HGNC:14209]
1620	ENSBTAG00000003469	ENSBTAG00000003469	1620.1.1	CHURC1	ENSG00000258289	churchill domain containing 1 [Source:HGNC Symbol;Acc:HGNC:20099]
1621	ENSBTAG00000003474	ENSBTAG00000003474	1621.1.1	RAB15	ENSG00000139998	RAB15, member RAS oncogene family [Source:HGNC Symbol;Acc:HGNC:20150]
1622	ENSBTAG00000003476	ENSBTAG00000003476	1622.1.1	FEM1A	ENSG00000141965	fem-1 homolog A [Source:HGNC Symbol;Acc:HGNC:16934]
1624	ENSBTAG00000003483	ENSBTAG00000003483	1624.1.1	NUDT18	ENSG00000275074	nudix hydrolase 18 [Source:HGNC Symbol;Acc:HGNC:26194]
1625	ENSBTAG00000003485	ENSBTAG00000003485	1625.1.1	MAGOH	ENSG00000162385	mago homolog, exon junction complex subunit [Source:HGNC Symbol;Acc:HGNC:6815]
1626	ENSBTAG00000003489	ENSBTAG00000003489	1626.1.1	IPCEF1	ENSG00000074706	interaction protein for cytohesin exchange factors 1 [Source:HGNC Symbol;Acc:HGNC:21204]
1627	ENSBTAG00000003490	ENSBTAG00000003490	1627.1.1	ELMO1	ENSG00000155849	engulfment and cell motility 1 [Source:HGNC Symbol;Acc:HGNC:16286]
1628	ENSBTAG00000003491	ENSBTAG00000003491	1628.1.1	SLC25A23	ENSG00000125648	solute carrier family 25 member 23 [Source:HGNC Symbol;Acc:HGNC:19375]
1629	ENSBTAG00000003494	ENSBTAG00000003494	1629.1.1	DNAAF9	ENSG00000088854	dynein axonemal assembly factor 9 [Source:HGNC Symbol;Acc:HGNC:17721]
1630	ENSBTAG00000003495	ENSBTAG00000003495	1630.1.1	KDM7A	ENSG00000006459	lysine demethylase 7A [Source:HGNC Symbol;Acc:HGNC:22224]
1631	ENSBTAG00000003496	ENSBTAG00000003496	1631.1.1	AIG1	ENSG00000146416	androgen induced 1 [Source:HGNC Symbol;Acc:HGNC:21607]
1632	ENSBTAG00000003498	ENSBTAG00000003498	1632.1.1	FAT2	ENSG00000086570	FAT atypical cadherin 2 [Source:HGNC Symbol;Acc:HGNC:3596]
1633	ENSBTAG00000003499	ENSBTAG00000003499	1633.1.1	ENPP4	ENSG00000001561	ectonucleotide pyrophosphatase/phosphodiesterase 4 [Source:HGNC Symbol;Acc:HGNC:3359]
1634	ENSBTAG00000003500	ENSBTAG00000003500	1634.1.1	DCAF7	ENSG00000136485	DDB1 and CUL4 associated factor 7 [Source:HGNC Symbol;Acc:HGNC:30915]
1635	ENSBTAG00000003501	ENSBTAG00000003501	1635.1.1	SACM1L	ENSG00000211456	SAC1 like phosphatidylinositide phosphatase [Source:HGNC Symbol;Acc:HGNC:17059]
1636	ENSBTAG00000003502	ENSBTAG00000003502	1636.1.1	SPOCK1	ENSG00000152377	SPARC (osteonectin), cwcv and kazal like domains proteoglycan 1 [Source:HGNC Symbol;Acc:HGNC:11251]
1637	ENSBTAG00000003503	ENSBTAG00000003503	1637.1.1	C16orf87	ENSG00000155330	chromosome 16 open reading frame 87 [Source:HGNC Symbol;Acc:HGNC:33754]
1638	ENSBTAG00000003504	ENSBTAG00000003504	1638.1.1	GSS	ENSG00000100983	glutathione synthetase [Source:HGNC Symbol;Acc:HGNC:4624]
1639	ENSBTAG00000003505	ENSBTAG00000003505	1639.1.1	DCN	ENSG00000011465	decorin [Source:HGNC Symbol;Acc:HGNC:2705]
1640	ENSBTAG00000003506	ENSBTAG00000003506	1640.1.1	STEAP2	ENSG00000157214	STEAP2 metalloreductase [Source:HGNC Symbol;Acc:HGNC:17885]
1641	ENSBTAG00000003508	ENSBTAG00000003508	1641.1.1	CFAP69	ENSG00000105792	cilia and flagella associated protein 69 [Source:HGNC Symbol;Acc:HGNC:26107]
1642	ENSBTAG00000003509	ENSBTAG00000003509	1642.1.1	PLEKHA2	ENSG00000169499	pleckstrin homology domain containing A2 [Source:HGNC Symbol;Acc:HGNC:14336]
1643	ENSBTAG00000003510	ENSBTAG00000003510	1643.1.1	MMRN2	ENSG00000173269	multimerin 2 [Source:HGNC Symbol;Acc:HGNC:19888]
1644	ENSBTAG00000003511	ENSBTAG00000003511	1644.1.1	SLAIN1	ENSG00000139737	SLAIN motif family member 1 [Source:HGNC Symbol;Acc:HGNC:26387]
1645	ENSBTAG00000003512	ENSBTAG00000003512	1645.1.1	MYH7B	ENSG00000078814	myosin heavy chain 7B [Source:HGNC Symbol;Acc:HGNC:15906]
1646	ENSBTAG00000003514	ENSBTAG00000003514	1646.1.1	HSF4	ENSG00000102878	heat shock transcription factor 4 [Source:HGNC Symbol;Acc:HGNC:5227]
1647	ENSBTAG00000003516	ENSBTAG00000003516	1647.1.1	TM2D2	ENSG00000169490	TM2 domain containing 2 [Source:HGNC Symbol;Acc:HGNC:24127]
1648	ENSBTAG00000003519	ENSBTAG00000003519	1648.1.1	NOL3	ENSG00000140939	nucleolar protein 3 [Source:HGNC Symbol;Acc:HGNC:7869]
1649	ENSBTAG00000003525	ENSBTAG00000003525	1649.1.1	STXBP1	ENSG00000136854	syntaxin binding protein 1 [Source:HGNC Symbol;Acc:HGNC:11444]
1650	ENSBTAG00000003526	ENSBTAG00000003526	1650.1.1	SYNE3	ENSG00000176438	spectrin repeat containing nuclear envelope family member 3 [Source:HGNC Symbol;Acc:HGNC:19861]
1652	ENSBTAG00000003530	ENSBTAG00000003530	1652.1.1	DDX31	ENSG00000125485	DEAD-box helicase 31 [Source:HGNC Symbol;Acc:HGNC:16715]
1653	ENSBTAG00000003532	ENSBTAG00000003532	1653.1.1	TLE4	ENSG00000106829	TLE family member 4, transcriptional corepressor [Source:HGNC Symbol;Acc:HGNC:11840]
1654	ENSBTAG00000003535	ENSBTAG00000003535	1654.1.1	DPM3	ENSG00000179085	dolichyl-phosphate mannosyltransferase subunit 3, regulatory [Source:HGNC Symbol;Acc:HGNC:3007]
1655	ENSBTAG00000003541	ENSBTAG00000003541	1655.1.1	ZNF614	ENSG00000142556	zinc finger protein 614 [Source:HGNC Symbol;Acc:HGNC:24722]
1656	ENSBTAG00000003543	ENSBTAG00000003543	1656.1.1	KEAP1	ENSG00000079999	kelch like ECH associated protein 1 [Source:HGNC Symbol;Acc:HGNC:23177]
1657	ENSBTAG00000003544	ENSBTAG00000003544	1657.1.1	S1PR5	ENSG00000180739	sphingosine-1-phosphate receptor 5 [Source:HGNC Symbol;Acc:HGNC:14299]
1658	ENSBTAG00000003545	ENSBTAG00000003545	1658.1.1	TAF1D	ENSG00000166012	TATA-box binding protein associated factor, RNA polymerase I subunit D [Source:HGNC Symbol;Acc:HGNC:28759]
1659	ENSBTAG00000003546	ENSBTAG00000003546	1659.1.1	TFAM	ENSG00000108064	transcription factor A, mitochondrial [Source:HGNC Symbol;Acc:HGNC:11741]
1661	ENSBTAG00000003550	ENSBTAG00000003550	1661.1.1	C11orf54	ENSG00000182919	chromosome 11 open reading frame 54 [Source:HGNC Symbol;Acc:HGNC:30204]
1662	ENSBTAG00000003552	ENSBTAG00000003552	1662.1.1	MED17	ENSG00000042429	mediator complex subunit 17 [Source:HGNC Symbol;Acc:HGNC:2375]
1663	ENSBTAG00000003553	ENSBTAG00000003553	1663.1.1	ZFP36L2	ENSG00000152518	ZFP36 ring finger protein like 2 [Source:HGNC Symbol;Acc:HGNC:1108]
1664	ENSBTAG00000003555	ENSBTAG00000003555	1664.1.1	THADA	ENSG00000115970	THADA armadillo repeat containing [Source:HGNC Symbol;Acc:HGNC:19217]
1665	ENSBTAG00000003556	ENSBTAG00000003556	1665.1.1	ZFYVE21	ENSG00000100711	zinc finger FYVE-type containing 21 [Source:HGNC Symbol;Acc:HGNC:20760]
1666	ENSBTAG00000003557	ENSBTAG00000003557	1666.1.1	CCDC117	ENSG00000159873	coiled-coil domain containing 117 [Source:HGNC Symbol;Acc:HGNC:26599]
1667	ENSBTAG00000003559	ENSBTAG00000003559	1667.1.1	PPP1R13B	ENSG00000088808	protein phosphatase 1 regulatory subunit 13B [Source:HGNC Symbol;Acc:HGNC:14950]
1668	ENSBTAG00000003561	ENSBTAG00000003561	1668.1.1	STK35	ENSG00000125834	serine/threonine kinase 35 [Source:HGNC Symbol;Acc:HGNC:16254]
1669	ENSBTAG00000003565	ENSBTAG00000003565	1669.1.1	TRIM3	ENSG00000110171	tripartite motif containing 3 [Source:HGNC Symbol;Acc:HGNC:10064]
1670	ENSBTAG00000003566	ENSBTAG00000003566	1670.1.1	ARFIP2	ENSG00000132254	ADP ribosylation factor interacting protein 2 [Source:HGNC Symbol;Acc:HGNC:17160]
1672	ENSBTAG00000003568	ENSBTAG00000003568	1672.1.1	CLDN10	ENSG00000134873	claudin 10 [Source:HGNC Symbol;Acc:HGNC:2033]
1673	ENSBTAG00000003569	ENSBTAG00000003569	1673.1.1	DZIP1	ENSG00000134874	DAZ interacting zinc finger protein 1 [Source:HGNC Symbol;Acc:HGNC:20908]
1674	ENSBTAG00000003570	ENSBTAG00000003570	1674.1.1	DDX19A	ENSG00000168872	DEAD-box helicase 19A [Source:HGNC Symbol;Acc:HGNC:25628]
1675	ENSBTAG00000003574	ENSBTAG00000003574	1675.1.1	SHISAL1	ENSG00000138944	shisa like 1 [Source:HGNC Symbol;Acc:HGNC:29335]
1676	ENSBTAG00000003575	ENSBTAG00000003575	1676.1.1	ZKSCAN4	ENSG00000187626	zinc finger with KRAB and SCAN domains 4 [Source:HGNC Symbol;Acc:HGNC:13854]
1677	ENSBTAG00000003576	ENSBTAG00000003576	1677.1.1	POLL	ENSG00000166169	DNA polymerase lambda [Source:HGNC Symbol;Acc:HGNC:9184]
1678	ENSBTAG00000003577	ENSBTAG00000003577	1678.1.1	GSPT1	ENSG00000103342	G1 to S phase transition 1 [Source:HGNC Symbol;Acc:HGNC:4621]
1679	ENSBTAG00000003578	ENSBTAG00000003578	1679.1.1	DPCD	ENSG00000166171	deleted in primary ciliary dyskinesia homolog (mouse) [Source:HGNC Symbol;Acc:HGNC:24542]
1680	ENSBTAG00000003579	ENSBTAG00000003579	1680.1.1	FBXW4	ENSG00000107829	F-box and WD repeat domain containing 4 [Source:HGNC Symbol;Acc:HGNC:10847]
1681	ENSBTAG00000003580	ENSBTAG00000003580	1681.1.1	PSD	ENSG00000059915	pleckstrin and Sec7 domain containing [Source:HGNC Symbol;Acc:HGNC:9507]
1682	ENSBTAG00000003581	ENSBTAG00000003581	1682.1.1	SETD7	ENSG00000145391	SET domain containing 7, histone lysine methyltransferase [Source:HGNC Symbol;Acc:HGNC:30412]
1683	ENSBTAG00000003585	ENSBTAG00000003585	1683.1.1	CD47	ENSG00000196776	CD47 molecule [Source:HGNC Symbol;Acc:HGNC:1682]
1684	ENSBTAG00000003586	ENSBTAG00000003586	1684.1.1	MAN1A2	ENSG00000198162	mannosidase alpha class 1A member 2 [Source:HGNC Symbol;Acc:HGNC:6822]
1685	ENSBTAG00000003587	ENSBTAG00000003587	1685.1.1	ELL	ENSG00000105656	elongation factor for RNA polymerase II [Source:HGNC Symbol;Acc:HGNC:23114]
1686	ENSBTAG00000003588	ENSBTAG00000003588	1686.1.1	ZFAND1	ENSG00000104231	zinc finger AN1-type containing 1 [Source:HGNC Symbol;Acc:HGNC:25858]
1687	ENSBTAG00000003589	ENSBTAG00000003589	1687.1.1	COMMD3	ENSG00000148444	COMM domain containing 3 [Source:HGNC Symbol;Acc:HGNC:23332]
1688	ENSBTAG00000003600	ENSBTAG00000003600	1688.1.1	CAPN8	ENSG00000203697	calpain 8 [Source:HGNC Symbol;Acc:HGNC:1485]
1689	ENSBTAG00000003602	ENSBTAG00000003602	1689.1.1	RBPJ	ENSG00000168214	recombination signal binding protein for immunoglobulin kappa J region [Source:HGNC Symbol;Acc:HGNC:5724]
1690	ENSBTAG00000003604	ENSBTAG00000003604	1690.1.1	ADAMTSL4	ENSG00000143382	ADAMTS like 4 [Source:HGNC Symbol;Acc:HGNC:19706]
1691	ENSBTAG00000003606	ENSBTAG00000003606	1691.1.1	GLI4	ENSG00000250571	GLI family zinc finger 4 [Source:HGNC Symbol;Acc:HGNC:4320]
1692	ENSBTAG00000003607	ENSBTAG00000003607	1692.1.1	FAM20C	ENSG00000177706	FAM20C golgi associated secretory pathway kinase [Source:HGNC Symbol;Acc:HGNC:22140]
1693	ENSBTAG00000003608	ENSBTAG00000003608	1693.1.1	SYCP2	ENSG00000196074	synaptonemal complex protein 2 [Source:HGNC Symbol;Acc:HGNC:11490]
1694	ENSBTAG00000003610	ENSBTAG00000003610	1694.1.1	DENND1A	ENSG00000119522	DENN domain containing 1A [Source:HGNC Symbol;Acc:HGNC:29324]
1695	ENSBTAG00000003614	ENSBTAG00000003614	1695.1.1	AP4B1	ENSG00000134262	adaptor related protein complex 4 subunit beta 1 [Source:HGNC Symbol;Acc:HGNC:572]
1696	ENSBTAG00000003616	ENSBTAG00000003616	1696.1.1	DCLRE1B	ENSG00000118655	DNA cross-link repair 1B [Source:HGNC Symbol;Acc:HGNC:17641]
1697	ENSBTAG00000003617	ENSBTAG00000003617	1697.1.1	ALKBH4	ENSG00000160993	alkB homolog 4, lysine demethylase [Source:HGNC Symbol;Acc:HGNC:21900]
1698	ENSBTAG00000003619	ENSBTAG00000003619	1698.1.1	SEC24D	ENSG00000150961	SEC24 homolog D, COPII coat complex component [Source:HGNC Symbol;Acc:HGNC:10706]
1699	ENSBTAG00000003622	ENSBTAG00000003622	1699.1.1	ZKSCAN7	ENSG00000196345	zinc finger with KRAB and SCAN domains 7 [Source:HGNC Symbol;Acc:HGNC:12955]
1700	ENSBTAG00000003626	ENSBTAG00000003626	1700.1.1	MYO3B	ENSG00000071909	myosin IIIB [Source:HGNC Symbol;Acc:HGNC:15576]
1701	ENSBTAG00000003629	ENSBTAG00000003629	1701.1.1	ASPA	ENSG00000108381	aspartoacylase [Source:HGNC Symbol;Acc:HGNC:756]
1702	ENSBTAG00000003632	ENSBTAG00000003632	1702.1.1	CYP39A1	ENSG00000146233	cytochrome P450 family 39 subfamily A member 1 [Source:HGNC Symbol;Acc:HGNC:17449]
1703	ENSBTAG00000003634	ENSBTAG00000003634	1703.1.1	CISD1	ENSG00000122873	CDGSH iron sulfur domain 1 [Source:HGNC Symbol;Acc:HGNC:30880]
1704	ENSBTAG00000003635	ENSBTAG00000003635	1704.1.1	SLC35C2	ENSG00000080189	solute carrier family 35 member C2 [Source:HGNC Symbol;Acc:HGNC:17117]
1705	ENSBTAG00000003636	ENSBTAG00000003636	1705.1.1	LIPA	ENSG00000107798	lipase A, lysosomal acid type [Source:HGNC Symbol;Acc:HGNC:6617]
1706	ENSBTAG00000003639	ENSBTAG00000003639	1706.1.1	ELMO2	ENSG00000062598	engulfment and cell motility 2 [Source:HGNC Symbol;Acc:HGNC:17233]
1708	ENSBTAG00000003644	ENSBTAG00000003644	1708.1.1	HSPBP1	ENSG00000133265	HSPA (Hsp70) binding protein 1 [Source:HGNC Symbol;Acc:HGNC:24989]
1709	ENSBTAG00000003649	ENSBTAG00000003649	1709.1.1	POMK	ENSG00000185900	protein O-mannose kinase [Source:HGNC Symbol;Acc:HGNC:26267]
1710	ENSBTAG00000003650	ENSBTAG00000003650	1710.1.1	NR4A2	ENSG00000153234	nuclear receptor subfamily 4 group A member 2 [Source:HGNC Symbol;Acc:HGNC:7981]
1711	ENSBTAG00000003651	ENSBTAG00000003651	1711.1.1	OTOP1	ENSG00000163982	otopetrin 1 [Source:HGNC Symbol;Acc:HGNC:19656]
1712	ENSBTAG00000003652	ENSBTAG00000003652	1712.1.1	TMEM128	ENSG00000132406	transmembrane protein 128 [Source:HGNC Symbol;Acc:HGNC:28201]
1713	ENSBTAG00000003653	ENSBTAG00000003653	1713.1.1	LYAR	ENSG00000145220	Ly1 antibody reactive [Source:HGNC Symbol;Acc:HGNC:26021]
1714	ENSBTAG00000003658	ENSBTAG00000003658	1714.1.1	RELN	ENSG00000189056	reelin [Source:HGNC Symbol;Acc:HGNC:9957]
1715	ENSBTAG00000003665	ENSBTAG00000003665	1715.1.1	NUP210	ENSG00000132182	nucleoporin 210 [Source:HGNC Symbol;Acc:HGNC:30052]
1716	ENSBTAG00000003667	ENSBTAG00000003667	1716.1.1	TLN2	ENSG00000171914	talin 2 [Source:HGNC Symbol;Acc:HGNC:15447]
1717	ENSBTAG00000003669	ENSBTAG00000003669	1717.1.1	BNC2	ENSG00000173068	basonuclin zinc finger protein 2 [Source:HGNC Symbol;Acc:HGNC:30988]
1719	ENSBTAG00000003675	ENSBTAG00000003675	1719.1.1	ADGRL1	ENSG00000072071	adhesion G protein-coupled receptor L1 [Source:HGNC Symbol;Acc:HGNC:20973]
1720	ENSBTAG00000003679	ENSBTAG00000003679	1720.1.1	PAAF1	ENSG00000175575	proteasomal ATPase associated factor 1 [Source:HGNC Symbol;Acc:HGNC:25687]
1721	ENSBTAG00000003687	ENSBTAG00000003687	1721.1.1	FOXK2	ENSG00000141568	forkhead box K2 [Source:HGNC Symbol;Acc:HGNC:6036]
1722	ENSBTAG00000003690	ENSBTAG00000003690	1722.1.1	NHLRC2	ENSG00000196865	NHL repeat containing 2 [Source:HGNC Symbol;Acc:HGNC:24731]
1723	ENSBTAG00000003692	ENSBTAG00000003692	1723.1.1	UCP2	ENSG00000175567	uncoupling protein 2 [Source:HGNC Symbol;Acc:HGNC:12518]
1724	ENSBTAG00000003693	ENSBTAG00000003693	1724.1.1	SUN2	ENSG00000100242	Sad1 and UNC84 domain containing 2 [Source:HGNC Symbol;Acc:HGNC:14210]
1725	ENSBTAG00000003695	ENSBTAG00000003695	1725.1.1	WDR45B	ENSG00000141580	WD repeat domain 45B [Source:HGNC Symbol;Acc:HGNC:25072]
1726	ENSBTAG00000003696	ENSBTAG00000003696	1726.1.1	BICDL1	ENSG00000135127	BICD family like cargo adaptor 1 [Source:HGNC Symbol;Acc:HGNC:28095]
1727	ENSBTAG00000003697	ENSBTAG00000003697	1727.1.1	TARDBP	ENSG00000120948	TAR DNA binding protein [Source:HGNC Symbol;Acc:HGNC:11571]
1728	ENSBTAG00000003699	ENSBTAG00000003699	1728.1.1	ZFP3	ENSG00000180787	ZFP3 zinc finger protein [Source:HGNC Symbol;Acc:HGNC:12861]
1729	ENSBTAG00000003702	ENSBTAG00000003702	1729.1.1	ANGEL2	ENSG00000174606	angel homolog 2 [Source:HGNC Symbol;Acc:HGNC:30534]
1730	ENSBTAG00000003705	ENSBTAG00000003705	1730.1.1	FAM83G	ENSG00000188522	family with sequence similarity 83 member G [Source:HGNC Symbol;Acc:HGNC:32554]
1731	ENSBTAG00000003707	ENSBTAG00000003707	1731.1.1	GRAP	ENSG00000154016	GRB2 related adaptor protein [Source:HGNC Symbol;Acc:HGNC:4562]
1731	ENSBTAG00000003707	ENSBTAG00000003707	1731.1.2	GRAPL	ENSG00000189152	GRB2 related adaptor protein like [Source:HGNC Symbol;Acc:HGNC:37240]
1732	ENSBTAG00000003708	ENSBTAG00000003708	1732.1.1	SEC23A	ENSG00000100934	SEC23 homolog A, COPII coat complex component [Source:HGNC Symbol;Acc:HGNC:10701]
1733	ENSBTAG00000003709	ENSBTAG00000003709	1733.1.1	ITGB8	ENSG00000105855	integrin subunit beta 8 [Source:HGNC Symbol;Acc:HGNC:6163]
1734	ENSBTAG00000003710	ENSBTAG00000003710	1734.1.1	XPO4	ENSG00000132953	exportin 4 [Source:HGNC Symbol;Acc:HGNC:17796]
1735	ENSBTAG00000003711	ENSBTAG00000003711	1735.1.1	EPAS1	ENSG00000116016	endothelial PAS domain protein 1 [Source:HGNC Symbol;Acc:HGNC:3374]
1736	ENSBTAG00000003712	ENSBTAG00000003712	1736.1.1	FAM89B	ENSG00000176973	family with sequence similarity 89 member B [Source:HGNC Symbol;Acc:HGNC:16708]
1737	ENSBTAG00000003718	ENSBTAG00000003718	1737.1.1	HACL1	ENSG00000131373	2-hydroxyacyl-CoA lyase 1 [Source:HGNC Symbol;Acc:HGNC:17856]
1738	ENSBTAG00000003719	ENSBTAG00000003719	1738.1.1	TDRD7	ENSG00000196116	tudor domain containing 7 [Source:HGNC Symbol;Acc:HGNC:30831]
1739	ENSBTAG00000003721	ENSBTAG00000003721	1739.1.1	CHST1	ENSG00000175264	carbohydrate sulfotransferase 1 [Source:HGNC Symbol;Acc:HGNC:1969]
1740	ENSBTAG00000003728	ENSBTAG00000003728	1740.1.1	NDUFS4	ENSG00000164258	NADH:ubiquinone oxidoreductase subunit S4 [Source:HGNC Symbol;Acc:HGNC:7711]
1741	ENSBTAG00000003733	ENSBTAG00000003733	1741.1.1	TM4SF5	ENSG00000142484	transmembrane 4 L six family member 5 [Source:HGNC Symbol;Acc:HGNC:11857]
1742	ENSBTAG00000003737	ENSBTAG00000003737	1742.1.1	SLC51B	ENSG00000186198	SLC51 subunit beta [Source:HGNC Symbol;Acc:HGNC:29956]
1743	ENSBTAG00000003741	ENSBTAG00000003741	1743.1.1	NEURL1	ENSG00000107954	neuralized E3 ubiquitin protein ligase 1 [Source:HGNC Symbol;Acc:HGNC:7761]
1744	ENSBTAG00000003745	ENSBTAG00000003745	1744.1.1	WDR48	ENSG00000114742	WD repeat domain 48 [Source:HGNC Symbol;Acc:HGNC:30914]
1745	ENSBTAG00000003746	ENSBTAG00000003746	1745.1.1	SCP2	ENSG00000116171	sterol carrier protein 2 [Source:HGNC Symbol;Acc:HGNC:10606]
1746	ENSBTAG00000003747	ENSBTAG00000003747	1746.1.1	PTGR2	ENSG00000140043	prostaglandin reductase 2 [Source:HGNC Symbol;Acc:HGNC:20149]
1747	ENSBTAG00000003748	ENSBTAG00000003748	1747.1.1	CNOT2	ENSG00000111596	CCR4-NOT transcription complex subunit 2 [Source:HGNC Symbol;Acc:HGNC:7878]
1748	ENSBTAG00000003749	ENSBTAG00000003749	1748.1.1	KCNMB4	ENSG00000135643	potassium calcium-activated channel subfamily M regulatory beta subunit 4 [Source:HGNC Symbol;Acc:HGNC:6289]
1749	ENSBTAG00000003751	ENSBTAG00000003751	1749.1.1	MACC1	ENSG00000183742	MET transcriptional regulator MACC1 [Source:HGNC Symbol;Acc:HGNC:30215]
1750	ENSBTAG00000003757	ENSBTAG00000003757	1750.1.1	DNAJA2	ENSG00000069345	DnaJ heat shock protein family (Hsp40) member A2 [Source:HGNC Symbol;Acc:HGNC:14884]
1751	ENSBTAG00000003758	ENSBTAG00000003758	1751.1.1	TKT	ENSG00000163931	transketolase [Source:HGNC Symbol;Acc:HGNC:11834]
1752	ENSBTAG00000003759	ENSBTAG00000003759	1752.1.1	PCNX3	ENSG00000197136	pecanex 3 [Source:HGNC Symbol;Acc:HGNC:18760]
1753	ENSBTAG00000003762	ENSBTAG00000003762	1753.1.1	GNB5	ENSG00000069966	G protein subunit beta 5 [Source:HGNC Symbol;Acc:HGNC:4401]
1754	ENSBTAG00000003763	ENSBTAG00000003763	1754.1.1	MYO5C	ENSG00000128833	myosin VC [Source:HGNC Symbol;Acc:HGNC:7604]
1755	ENSBTAG00000003764	ENSBTAG00000003764	1755.1.1	AKIRIN2	ENSG00000135334	akirin 2 [Source:HGNC Symbol;Acc:HGNC:21407]
1756	ENSBTAG00000003766	ENSBTAG00000003766	1756.1.1	BLOC1S4	ENSG00000186222	biogenesis of lysosomal organelles complex 1 subunit 4 [Source:HGNC Symbol;Acc:HGNC:24206]
1757	ENSBTAG00000003773	ENSBTAG00000003773	1757.1.1	SLC25A13	ENSG00000004864	solute carrier family 25 member 13 [Source:HGNC Symbol;Acc:HGNC:10983]
1758	ENSBTAG00000003776	ENSBTAG00000003776	1758.1.1	MSANTD1	ENSG00000188981	Myb/SANT DNA binding domain containing 1 [Source:HGNC Symbol;Acc:HGNC:33741]
1759	ENSBTAG00000003777	ENSBTAG00000003777	1759.1.1	TIE1	ENSG00000066056	tyrosine kinase with immunoglobulin like and EGF like domains 1 [Source:HGNC Symbol;Acc:HGNC:11809]
1760	ENSBTAG00000003784	ENSBTAG00000003784	1760.1.1	DNAJC2	ENSG00000105821	DnaJ heat shock protein family (Hsp40) member C2 [Source:HGNC Symbol;Acc:HGNC:13192]
1761	ENSBTAG00000003786	ENSBTAG00000003786	1761.1.1	GCGR	ENSG00000215644	glucagon receptor [Source:HGNC Symbol;Acc:HGNC:4192]
1762	ENSBTAG00000003788	ENSBTAG00000003788	1762.1.1	RCC1	ENSG00000180198	regulator of chromosome condensation 1 [Source:HGNC Symbol;Acc:HGNC:1913]
1763	ENSBTAG00000003789	ENSBTAG00000003789	1763.1.1	VIRMA	ENSG00000164944	vir like m6A methyltransferase associated [Source:HGNC Symbol;Acc:HGNC:24500]
1764	ENSBTAG00000003791	ENSBTAG00000003791	1764.1.1	LPAR3	ENSG00000171517	lysophosphatidic acid receptor 3 [Source:HGNC Symbol;Acc:HGNC:14298]
1765	ENSBTAG00000003793	ENSBTAG00000003793	1765.1.1	NGLY1	ENSG00000151092	N-glycanase 1 [Source:HGNC Symbol;Acc:HGNC:17646]
1766	ENSBTAG00000003794	ENSBTAG00000003794	1766.1.1	GNAO1	ENSG00000087258	G protein subunit alpha o1 [Source:HGNC Symbol;Acc:HGNC:4389]
1767	ENSBTAG00000003798	ENSBTAG00000003798	1767.1.1	AMFR	ENSG00000159461	autocrine motility factor receptor [Source:HGNC Symbol;Acc:HGNC:463]
1768	ENSBTAG00000003799	ENSBTAG00000003799	1768.1.1	TARS2	ENSG00000143374	threonyl-tRNA synthetase 2, mitochondrial [Source:HGNC Symbol;Acc:HGNC:30740]
1769	ENSBTAG00000003800	ENSBTAG00000003800	1769.1.1	LRRC27	ENSG00000148814	leucine rich repeat containing 27 [Source:HGNC Symbol;Acc:HGNC:29346]
1770	ENSBTAG00000003801	ENSBTAG00000003801	1770.1.1	MBD1	ENSG00000141644	methyl-CpG binding domain protein 1 [Source:HGNC Symbol;Acc:HGNC:6916]
1771	ENSBTAG00000003802	ENSBTAG00000003802	1771.1.1	TEKT3	ENSG00000125409	tektin 3 [Source:HGNC Symbol;Acc:HGNC:14293]
1772	ENSBTAG00000003804	ENSBTAG00000003804	1772.1.1	SCCPDH	ENSG00000143653	saccharopine dehydrogenase (putative) [Source:HGNC Symbol;Acc:HGNC:24275]
1773	ENSBTAG00000003806	ENSBTAG00000003806	1773.1.1	ECM1	ENSG00000143369	extracellular matrix protein 1 [Source:HGNC Symbol;Acc:HGNC:3153]
1774	ENSBTAG00000003807	ENSBTAG00000003807	1774.1.1	CNOT9	ENSG00000144580	CCR4-NOT transcription complex subunit 9 [Source:HGNC Symbol;Acc:HGNC:10445]
1775	ENSBTAG00000003808	ENSBTAG00000003808	1775.1.1	HDAC9	ENSG00000048052	histone deacetylase 9 [Source:HGNC Symbol;Acc:HGNC:14065]
1776	ENSBTAG00000003809	ENSBTAG00000003809	1776.1.1	PLCD4	ENSG00000115556	phospholipase C delta 4 [Source:HGNC Symbol;Acc:HGNC:9062]
1777	ENSBTAG00000003813	ENSBTAG00000003813	1777.1.1	BCS1L	ENSG00000074582	BCS1 homolog, ubiquinol-cytochrome c reductase complex chaperone [Source:HGNC Symbol;Acc:HGNC:1020]
1778	ENSBTAG00000003815	ENSBTAG00000003815	1778.1.1	EDEM2	ENSG00000088298	ER degradation enhancing alpha-mannosidase like protein 2 [Source:HGNC Symbol;Acc:HGNC:15877]
1779	ENSBTAG00000003817	ENSBTAG00000003817	1779.1.1	RNF25	ENSG00000163481	ring finger protein 25 [Source:HGNC Symbol;Acc:HGNC:14662]
1780	ENSBTAG00000003819	ENSBTAG00000003819	1780.1.1	STK36	ENSG00000163482	serine/threonine kinase 36 [Source:HGNC Symbol;Acc:HGNC:17209]
1781	ENSBTAG00000003820	ENSBTAG00000003820	1781.1.1	GRAMD1A	ENSG00000089351	GRAM domain containing 1A [Source:HGNC Symbol;Acc:HGNC:29305]
1782	ENSBTAG00000003822	ENSBTAG00000003822	1782.1.1	CROCC	ENSG00000058453	ciliary rootlet coiled-coil, rootletin [Source:HGNC Symbol;Acc:HGNC:21299]
1783	ENSBTAG00000003825	ENSBTAG00000003825	1783.1.1	PTPN12	ENSG00000127947	protein tyrosine phosphatase non-receptor type 12 [Source:HGNC Symbol;Acc:HGNC:9645]
1784	ENSBTAG00000003826	ENSBTAG00000003826	1784.1.1	SCN1B	ENSG00000105711	sodium voltage-gated channel beta subunit 1 [Source:HGNC Symbol;Acc:HGNC:10586]
1785	ENSBTAG00000003827	ENSBTAG00000003827	1785.1.1	RIMS2	ENSG00000176406	regulating synaptic membrane exocytosis 2 [Source:HGNC Symbol;Acc:HGNC:17283]
1786	ENSBTAG00000003829	ENSBTAG00000003829	1786.1.1	HPN	ENSG00000105707	hepsin [Source:HGNC Symbol;Acc:HGNC:5155]
1787	ENSBTAG00000003830	ENSBTAG00000003830	1787.1.1	PSMB3	ENSG00000277791	proteasome 20S subunit beta 3 [Source:HGNC Symbol;Acc:HGNC:9540]
1788	ENSBTAG00000003832	ENSBTAG00000003832	1788.1.1	MFAP2	ENSG00000117122	microfibril associated protein 2 [Source:HGNC Symbol;Acc:HGNC:7033]
1789	ENSBTAG00000003835	ENSBTAG00000003835	1789.1.1	BMP4	ENSG00000125378	bone morphogenetic protein 4 [Source:HGNC Symbol;Acc:HGNC:1071]
1790	ENSBTAG00000003836	ENSBTAG00000003836	1790.1.1	ADAM19	ENSG00000135074	ADAM metallopeptidase domain 19 [Source:HGNC Symbol;Acc:HGNC:197]
1791	ENSBTAG00000003840	ENSBTAG00000003840	1791.1.1	GUCY1B1	ENSG00000061918	guanylate cyclase 1 soluble subunit beta 1 [Source:HGNC Symbol;Acc:HGNC:4687]
1792	ENSBTAG00000003842	ENSBTAG00000003842	1792.1.1	RABGEF1	ENSG00000154710	RAB guanine nucleotide exchange factor 1 [Source:HGNC Symbol;Acc:HGNC:17676]
1793	ENSBTAG00000003843	ENSBTAG00000003843	1793.1.1	SMARCAL1	ENSG00000138375	SWI/SNF related, matrix associated, actin dependent regulator of chromatin, subfamily a like 1 [Source:HGNC Symbol;Acc:HGNC:11102]
1794	ENSBTAG00000003845	ENSBTAG00000003845	1794.1.1	CSRNP1	ENSG00000144655	cysteine and serine rich nuclear protein 1 [Source:HGNC Symbol;Acc:HGNC:14300]
1795	ENSBTAG00000003848	ENSBTAG00000003848	1795.1.1	ATRN	ENSG00000088812	attractin [Source:HGNC Symbol;Acc:HGNC:885]
1796	ENSBTAG00000003849	ENSBTAG00000003849	1796.1.1	GNL2	ENSG00000134697	G protein nucleolar 2 [Source:HGNC Symbol;Acc:HGNC:29925]
1797	ENSBTAG00000003851	ENSBTAG00000003851	1797.1.1	CCNL1	ENSG00000163660	cyclin L1 [Source:HGNC Symbol;Acc:HGNC:20569]
1798	ENSBTAG00000003857	ENSBTAG00000003857	1798.1.1	SUSD6	ENSG00000100647	sushi domain containing 6 [Source:HGNC Symbol;Acc:HGNC:19956]
1799	ENSBTAG00000003861	ENSBTAG00000003861	1799.1.1	GPATCH11	ENSG00000152133	G-patch domain containing 11 [Source:HGNC Symbol;Acc:HGNC:26768]
1800	ENSBTAG00000003863	ENSBTAG00000003863	1800.1.1	PCED1A	ENSG00000132635	PC-esterase domain containing 1A [Source:HGNC Symbol;Acc:HGNC:16212]
1801	ENSBTAG00000003866	ENSBTAG00000003866	1801.1.1	PPP1R8	ENSG00000117751	protein phosphatase 1 regulatory subunit 8 [Source:HGNC Symbol;Acc:HGNC:9296]
1802	ENSBTAG00000003871	ENSBTAG00000003871	1802.1.1	CYP2B6	ENSG00000197408	cytochrome P450 family 2 subfamily B member 6 [Source:HGNC Symbol;Acc:HGNC:2615]
1803	ENSBTAG00000003872	ENSBTAG00000003872	1803.1.1	STX16	ENSG00000124222	syntaxin 16 [Source:HGNC Symbol;Acc:HGNC:11431]
1804	ENSBTAG00000003876	ENSBTAG00000003876	1804.1.1	MCU	ENSG00000156026	mitochondrial calcium uniporter [Source:HGNC Symbol;Acc:HGNC:23526]
1805	ENSBTAG00000003877	ENSBTAG00000003877	1805.1.1	ZCCHC24	ENSG00000165424	zinc finger CCHC-type containing 24 [Source:HGNC Symbol;Acc:HGNC:26911]
1806	ENSBTAG00000003878	ENSBTAG00000003878	1806.1.1	ZUP1	ENSG00000153975	zinc finger containing ubiquitin peptidase 1 [Source:HGNC Symbol;Acc:HGNC:21224]
1807	ENSBTAG00000003880	ENSBTAG00000003880	1807.1.1	EMILIN2	ENSG00000132205	elastin microfibril interfacer 2 [Source:HGNC Symbol;Acc:HGNC:19881]
1808	ENSBTAG00000003882	ENSBTAG00000003882	1808.1.1	EMC3	ENSG00000125037	ER membrane protein complex subunit 3 [Source:HGNC Symbol;Acc:HGNC:23999]
1809	ENSBTAG00000003884	ENSBTAG00000003884	1809.1.1	FAM120B	ENSG00000112584	family with sequence similarity 120 member B [Source:HGNC Symbol;Acc:HGNC:21109]
1810	ENSBTAG00000003885	ENSBTAG00000003885	1810.1.1	PEX2	ENSG00000164751	peroxisomal biogenesis factor 2 [Source:HGNC Symbol;Acc:HGNC:9717]
1811	ENSBTAG00000003887	ENSBTAG00000003887	1811.1.1	ECHDC1	ENSG00000093144	ethylmalonyl-CoA decarboxylase 1 [Source:HGNC Symbol;Acc:HGNC:21489]
1812	ENSBTAG00000003889	ENSBTAG00000003889	1812.1.1	PER1	ENSG00000179094	period circadian regulator 1 [Source:HGNC Symbol;Acc:HGNC:8845]
1813	ENSBTAG00000003894	ENSBTAG00000003894	1813.1.1	NDRG4	ENSG00000103034	NDRG family member 4 [Source:HGNC Symbol;Acc:HGNC:14466]
1815	ENSBTAG00000003901	ENSBTAG00000003901	1815.1.1	DNMT3B	ENSG00000088305	DNA methyltransferase 3 beta [Source:HGNC Symbol;Acc:HGNC:2979]
1816	ENSBTAG00000003902	ENSBTAG00000003902	1816.1.1	ZNF512	ENSG00000243943	zinc finger protein 512 [Source:HGNC Symbol;Acc:HGNC:29380]
1817	ENSBTAG00000003904	ENSBTAG00000003904	1817.1.1	GPN1	ENSG00000198522	GPN-loop GTPase 1 [Source:HGNC Symbol;Acc:HGNC:17030]
1818	ENSBTAG00000003906	ENSBTAG00000003906	1818.1.1	SUPT7L	ENSG00000119760	SPT7 like, STAGA complex subunit gamma [Source:HGNC Symbol;Acc:HGNC:30632]
1819	ENSBTAG00000003907	ENSBTAG00000003907	1819.1.1	TSPAN14	ENSG00000108219	tetraspanin 14 [Source:HGNC Symbol;Acc:HGNC:23303]
1820	ENSBTAG00000003908	ENSBTAG00000003908	1820.1.1	MAPRE1	ENSG00000101367	microtubule associated protein RP/EB family member 1 [Source:HGNC Symbol;Acc:HGNC:6890]
1821	ENSBTAG00000003914	ENSBTAG00000003914	1821.1.1	MVB12A	ENSG00000141971	multivesicular body subunit 12A [Source:HGNC Symbol;Acc:HGNC:25153]
1822	ENSBTAG00000003915	ENSBTAG00000003915	1822.1.1	LARP6	ENSG00000166173	La ribonucleoprotein 6, translational regulator [Source:HGNC Symbol;Acc:HGNC:24012]
1823	ENSBTAG00000003916	ENSBTAG00000003916	1823.1.1	DPH3	ENSG00000154813	diphthamide biosynthesis 3 [Source:HGNC Symbol;Acc:HGNC:27717]
1824	ENSBTAG00000003919	ENSBTAG00000003919	1824.1.1	KIAA0408	ENSG00000189367	KIAA0408 [Source:HGNC Symbol;Acc:HGNC:21636]
1825	ENSBTAG00000003922	ENSBTAG00000003922	1825.1.1	MPHOSPH8	ENSG00000196199	M-phase phosphoprotein 8 [Source:HGNC Symbol;Acc:HGNC:29810]
1827	ENSBTAG00000003927	ENSBTAG00000003927	1827.1.1	AAMP	ENSG00000127837	angio associated migratory cell protein [Source:HGNC Symbol;Acc:HGNC:18]
1828	ENSBTAG00000003928	ENSBTAG00000003928	1828.1.1	ATG16L1	ENSG00000085978	autophagy related 16 like 1 [Source:HGNC Symbol;Acc:HGNC:21498]
1829	ENSBTAG00000003929	ENSBTAG00000003929	1829.1.1	PHF10	ENSG00000130024	PHD finger protein 10 [Source:HGNC Symbol;Acc:HGNC:18250]
1830	ENSBTAG00000003934	ENSBTAG00000003934	1830.1.1	PSPC1	ENSG00000121390	paraspeckle component 1 [Source:HGNC Symbol;Acc:HGNC:20320]
1831	ENSBTAG00000003935	ENSBTAG00000003935	1831.1.1	TMBIM1	ENSG00000135926	transmembrane BAX inhibitor motif containing 1 [Source:HGNC Symbol;Acc:HGNC:23410]
1832	ENSBTAG00000003938	ENSBTAG00000003938	1832.1.1	FNDC1	ENSG00000164694	fibronectin type III domain containing 1 [Source:HGNC Symbol;Acc:HGNC:21184]
1833	ENSBTAG00000003941	ENSBTAG00000003941	1833.1.1	AP1AR	ENSG00000138660	adaptor related protein complex 1 associated regulatory protein [Source:HGNC Symbol;Acc:HGNC:28808]
1834	ENSBTAG00000003942	ENSBTAG00000003942	1834.1.1	PIP4K2C	ENSG00000166908	phosphatidylinositol-5-phosphate 4-kinase type 2 gamma [Source:HGNC Symbol;Acc:HGNC:23786]
1835	ENSBTAG00000003943	ENSBTAG00000003943	1835.1.1	TTC39B	ENSG00000155158	tetratricopeptide repeat domain 39B [Source:HGNC Symbol;Acc:HGNC:23704]
1836	ENSBTAG00000003946	ENSBTAG00000003946	1836.1.1	NECAB3	ENSG00000125967	N-terminal EF-hand calcium binding protein 3 [Source:HGNC Symbol;Acc:HGNC:15851]
1837	ENSBTAG00000003947	ENSBTAG00000003947	1837.1.1	SSBP4	ENSG00000130511	single stranded DNA binding protein 4 [Source:HGNC Symbol;Acc:HGNC:15676]
1838	ENSBTAG00000003948	ENSBTAG00000003948	1838.1.1	FDPS	ENSG00000160752	farnesyl diphosphate synthase [Source:HGNC Symbol;Acc:HGNC:3631]
1839	ENSBTAG00000003949	ENSBTAG00000003949	1839.1.1	RBM39	ENSG00000131051	RNA binding motif protein 39 [Source:HGNC Symbol;Acc:HGNC:15923]
1841	ENSBTAG00000003952	ENSBTAG00000003952	1841.1.1	FBXL2	ENSG00000153558	F-box and leucine rich repeat protein 2 [Source:HGNC Symbol;Acc:HGNC:13598]
1842	ENSBTAG00000003953	ENSBTAG00000003953	1842.1.1	ZNF316	ENSG00000205903	zinc finger protein 316 [Source:HGNC Symbol;Acc:HGNC:13843]
1843	ENSBTAG00000003954	ENSBTAG00000003954	1843.1.1	ASH1L	ENSG00000116539	ASH1 like histone lysine methyltransferase [Source:HGNC Symbol;Acc:HGNC:19088]
1844	ENSBTAG00000003955	ENSBTAG00000003955	1844.1.1	MYO7A	ENSG00000137474	myosin VIIA [Source:HGNC Symbol;Acc:HGNC:7606]
1845	ENSBTAG00000003958	ENSBTAG00000003958	1845.1.1	TMEM220	ENSG00000187824	transmembrane protein 220 [Source:HGNC Symbol;Acc:HGNC:33757]
1846	ENSBTAG00000003959	ENSBTAG00000003959	1846.1.1	ARHGAP24	ENSG00000138639	Rho GTPase activating protein 24 [Source:HGNC Symbol;Acc:HGNC:25361]
1847	ENSBTAG00000003960	ENSBTAG00000003960	1847.1.1	CCP110	ENSG00000103540	centriolar coiled-coil protein 110 [Source:HGNC Symbol;Acc:HGNC:24342]
1848	ENSBTAG00000003961	ENSBTAG00000003961	1848.1.1	SNX20	ENSG00000167208	sorting nexin 20 [Source:HGNC Symbol;Acc:HGNC:30390]
1849	ENSBTAG00000003963	ENSBTAG00000003963	1849.1.1	FER1L5	ENSG00000249715	fer-1 like family member 5 [Source:HGNC Symbol;Acc:HGNC:19044]
1852	ENSBTAG00000003967	ENSBTAG00000003967	1852.1.1	OTUB1	ENSG00000167770	OTU deubiquitinase, ubiquitin aldehyde binding 1 [Source:HGNC Symbol;Acc:HGNC:23077]
1853	ENSBTAG00000003968	ENSBTAG00000003968	1853.1.1	UBP1	ENSG00000153560	upstream binding protein 1 [Source:HGNC Symbol;Acc:HGNC:12507]
1854	ENSBTAG00000003970	ENSBTAG00000003970	1854.1.1	MITD1	ENSG00000158411	microtubule interacting and trafficking domain containing 1 [Source:HGNC Symbol;Acc:HGNC:25207]
1855	ENSBTAG00000003971	ENSBTAG00000003971	1855.1.1	E2F1	ENSG00000101412	E2F transcription factor 1 [Source:HGNC Symbol;Acc:HGNC:3113]
1856	ENSBTAG00000003975	ENSBTAG00000003975	1856.1.1	LMAN2L	ENSG00000114988	lectin, mannose binding 2 like [Source:HGNC Symbol;Acc:HGNC:19263]
1857	ENSBTAG00000003981	ENSBTAG00000003981	1857.1.1	RRP1	ENSG00000160214	ribosomal RNA processing 1 [Source:HGNC Symbol;Acc:HGNC:18785]
1858	ENSBTAG00000003983	ENSBTAG00000003983	1858.1.1	TOM1L2	ENSG00000175662	target of myb1 like 2 membrane trafficking protein [Source:HGNC Symbol;Acc:HGNC:11984]
1859	ENSBTAG00000003985	ENSBTAG00000003985	1859.1.1	CCDC15	ENSG00000149548	coiled-coil domain containing 15 [Source:HGNC Symbol;Acc:HGNC:25798]
1860	ENSBTAG00000003986	ENSBTAG00000003986	1860.1.1	CXXC5	ENSG00000171604	CXXC finger protein 5 [Source:HGNC Symbol;Acc:HGNC:26943]
1861	ENSBTAG00000003989	ENSBTAG00000003989	1861.1.1	GSTO1	ENSG00000148834	glutathione S-transferase omega 1 [Source:HGNC Symbol;Acc:HGNC:13312]
1862	ENSBTAG00000003990	ENSBTAG00000003990	1862.1.1	ITPRIP	ENSG00000148841	inositol 1,4,5-trisphosphate receptor interacting protein [Source:HGNC Symbol;Acc:HGNC:29370]
1863	ENSBTAG00000003994	ENSBTAG00000003994	1863.1.1	IGFBP3	ENSG00000146674	insulin like growth factor binding protein 3 [Source:HGNC Symbol;Acc:HGNC:5472]
1864	ENSBTAG00000003997	ENSBTAG00000003997	1864.1.1	UBE2D4	ENSG00000078967	ubiquitin conjugating enzyme E2 D4 (putative) [Source:HGNC Symbol;Acc:HGNC:21647]
1865	ENSBTAG00000004000	ENSBTAG00000004000	1865.1.1	SAP30L	ENSG00000164576	SAP30 like [Source:HGNC Symbol;Acc:HGNC:25663]
1866	ENSBTAG00000004004	ENSBTAG00000004004	1866.1.1	CSDC2	ENSG00000172346	cold shock domain containing C2 [Source:HGNC Symbol;Acc:HGNC:30359]
1867	ENSBTAG00000004005	ENSBTAG00000004005	1867.1.1	WDR7	ENSG00000091157	WD repeat domain 7 [Source:HGNC Symbol;Acc:HGNC:13490]
1868	ENSBTAG00000004009	ENSBTAG00000004009	1868.1.1	PMM1	ENSG00000100417	phosphomannomutase 1 [Source:HGNC Symbol;Acc:HGNC:9114]
1869	ENSBTAG00000004010	ENSBTAG00000004010	1869.1.1	PAPPA	ENSG00000182752	pappalysin 1 [Source:HGNC Symbol;Acc:HGNC:8602]
1870	ENSBTAG00000004011	ENSBTAG00000004011	1870.1.1	GALK2	ENSG00000156958	galactokinase 2 [Source:HGNC Symbol;Acc:HGNC:4119]
1871	ENSBTAG00000004014	ENSBTAG00000004014	1871.1.1	FBLN2	ENSG00000163520	fibulin 2 [Source:HGNC Symbol;Acc:HGNC:3601]
1872	ENSBTAG00000004015	ENSBTAG00000004015	1872.1.1	KAT6A	ENSG00000083168	lysine acetyltransferase 6A [Source:HGNC Symbol;Acc:HGNC:13013]
1873	ENSBTAG00000004017	ENSBTAG00000004017	1873.1.1	PLEKHG2	ENSG00000090924	pleckstrin homology and RhoGEF domain containing G2 [Source:HGNC Symbol;Acc:HGNC:29515]
1874	ENSBTAG00000004018	ENSBTAG00000004018	1874.1.1	DGKA	ENSG00000065357	diacylglycerol kinase alpha [Source:HGNC Symbol;Acc:HGNC:2849]
1875	ENSBTAG00000004019	ENSBTAG00000004019	1875.1.1	PMEL	ENSG00000185664	premelanosome protein [Source:HGNC Symbol;Acc:HGNC:10880]
1876	ENSBTAG00000004021	ENSBTAG00000004021	1876.1.1	CDK2	ENSG00000123374	cyclin dependent kinase 2 [Source:HGNC Symbol;Acc:HGNC:1771]
1877	ENSBTAG00000004022	ENSBTAG00000004022	1877.1.1	PLAG1	ENSG00000181690	PLAG1 zinc finger [Source:HGNC Symbol;Acc:HGNC:9045]
1878	ENSBTAG00000004024	ENSBTAG00000004024	1878.1.1	UBE2Q2	ENSG00000140367	ubiquitin conjugating enzyme E2 Q2 [Source:HGNC Symbol;Acc:HGNC:19248]
1879	ENSBTAG00000004028	ENSBTAG00000004028	1879.1.1	POLK	ENSG00000122008	DNA polymerase kappa [Source:HGNC Symbol;Acc:HGNC:9183]
1880	ENSBTAG00000004034	ENSBTAG00000004034	1880.1.1	SESN3	ENSG00000149212	sestrin 3 [Source:HGNC Symbol;Acc:HGNC:23060]
1881	ENSBTAG00000004035	ENSBTAG00000004035	1881.1.1	SDK1	ENSG00000146555	sidekick cell adhesion molecule 1 [Source:HGNC Symbol;Acc:HGNC:19307]
1884	ENSBTAG00000004038	ENSBTAG00000004038	1884.1.1	ABAT	ENSG00000183044	4-aminobutyrate aminotransferase [Source:HGNC Symbol;Acc:HGNC:23]
1885	ENSBTAG00000004039	ENSBTAG00000004039	1885.1.1	DHX35	ENSG00000101452	DEAH-box helicase 35 [Source:HGNC Symbol;Acc:HGNC:15861]
1886	ENSBTAG00000004041	ENSBTAG00000004041	1886.1.1	ANKRD10	ENSG00000088448	ankyrin repeat domain 10 [Source:HGNC Symbol;Acc:HGNC:20265]
1887	ENSBTAG00000004046	ENSBTAG00000004046	1887.1.1	DTX4	ENSG00000110042	deltex E3 ubiquitin ligase 4 [Source:HGNC Symbol;Acc:HGNC:29151]
1888	ENSBTAG00000004051	ENSBTAG00000004051	1888.1.1	SBDS	ENSG00000126524	SBDS ribosome maturation factor [Source:HGNC Symbol;Acc:HGNC:19440]
1889	ENSBTAG00000004054	ENSBTAG00000004054	1889.1.1	PAPOLA	ENSG00000090060	poly(A) polymerase alpha [Source:HGNC Symbol;Acc:HGNC:14981]
1890	ENSBTAG00000004059	ENSBTAG00000004059	1890.1.1	SOAT1	ENSG00000057252	sterol O-acyltransferase 1 [Source:HGNC Symbol;Acc:HGNC:11177]
1891	ENSBTAG00000004061	ENSBTAG00000004061	1891.1.1	PP2D1	ENSG00000183977	protein phosphatase 2C like domain containing 1 [Source:HGNC Symbol;Acc:HGNC:28406]
1892	ENSBTAG00000004063	ENSBTAG00000004063	1892.1.1	SERPINA5	ENSG00000188488	serpin family A member 5 [Source:HGNC Symbol;Acc:HGNC:8723]
1893	ENSBTAG00000004064	ENSBTAG00000004064	1893.1.1	BPNT1	ENSG00000162813	3'(2'), 5'-bisphosphate nucleotidase 1 [Source:HGNC Symbol;Acc:HGNC:1096]
1894	ENSBTAG00000004066	ENSBTAG00000004066	1894.1.1	PARP8	ENSG00000151883	poly(ADP-ribose) polymerase family member 8 [Source:HGNC Symbol;Acc:HGNC:26124]
1895	ENSBTAG00000004072	ENSBTAG00000004072	1895.1.1	CAPZA2	ENSG00000198898	capping actin protein of muscle Z-line subunit alpha 2 [Source:HGNC Symbol;Acc:HGNC:1490]
1896	ENSBTAG00000004073	ENSBTAG00000004073	1896.1.1	MTA3	ENSG00000057935	metastasis associated 1 family member 3 [Source:HGNC Symbol;Acc:HGNC:23784]
1897	ENSBTAG00000004075	ENSBTAG00000004075	1897.1.1	IDI1	ENSG00000067064	isopentenyl-diphosphate delta isomerase 1 [Source:HGNC Symbol;Acc:HGNC:5387]
1898	ENSBTAG00000004077	ENSBTAG00000004077	1898.1.1	YWHAG	ENSG00000170027	tyrosine 3-monooxygenase/tryptophan 5-monooxygenase activation protein gamma [Source:HGNC Symbol;Acc:HGNC:12852]
1899	ENSBTAG00000004078	ENSBTAG00000004078	1899.1.1	KCNH2	ENSG00000055118	potassium voltage-gated channel subfamily H member 2 [Source:HGNC Symbol;Acc:HGNC:6251]
1900	ENSBTAG00000004079	ENSBTAG00000004079	1900.1.1	ZNF106	ENSG00000103994	zinc finger protein 106 [Source:HGNC Symbol;Acc:HGNC:12886]
1901	ENSBTAG00000004080	ENSBTAG00000004080	1901.1.1	TIAL1	ENSG00000151923	TIA1 cytotoxic granule associated RNA binding protein like 1 [Source:HGNC Symbol;Acc:HGNC:11804]
1902	ENSBTAG00000004081	ENSBTAG00000004081	1902.1.1	FAT3	ENSG00000165323	FAT atypical cadherin 3 [Source:HGNC Symbol;Acc:HGNC:23112]
1903	ENSBTAG00000004086	ENSBTAG00000004086	1903.1.1	SPINT1	ENSG00000166145	serine peptidase inhibitor, Kunitz type 1 [Source:HGNC Symbol;Acc:HGNC:11246]
1904	ENSBTAG00000004091	ENSBTAG00000004091	1904.1.1	GTF3C4	ENSG00000125484	general transcription factor IIIC subunit 4 [Source:HGNC Symbol;Acc:HGNC:4667]
1905	ENSBTAG00000004092	ENSBTAG00000004092	1905.1.1	AK8	ENSG00000165695	adenylate kinase 8 [Source:HGNC Symbol;Acc:HGNC:26526]
1906	ENSBTAG00000004094	ENSBTAG00000004094	1906.1.1	SPARCL1	ENSG00000152583	SPARC like 1 [Source:HGNC Symbol;Acc:HGNC:11220]
1907	ENSBTAG00000004098	ENSBTAG00000004098	1907.1.1	ARMT1	ENSG00000146476	acidic residue methyltransferase 1 [Source:HGNC Symbol;Acc:HGNC:17872]
1908	ENSBTAG00000004099	ENSBTAG00000004099	1908.1.1	CCDC170	ENSG00000120262	coiled-coil domain containing 170 [Source:HGNC Symbol;Acc:HGNC:21177]
1909	ENSBTAG00000004100	ENSBTAG00000004100	1909.1.1	TTI1	ENSG00000101407	TELO2 interacting protein 1 [Source:HGNC Symbol;Acc:HGNC:29029]
1910	ENSBTAG00000004104	ENSBTAG00000004104	1910.1.1	RUNX2	ENSG00000124813	RUNX family transcription factor 2 [Source:HGNC Symbol;Acc:HGNC:10472]
1911	ENSBTAG00000004106	ENSBTAG00000004106	1911.1.1	PRKRIP1	ENSG00000128563	PRKR interacting protein 1 [Source:HGNC Symbol;Acc:HGNC:21894]
1912	ENSBTAG00000004108	ENSBTAG00000004108	1912.1.1	CENPX	ENSG00000169689	centromere protein X [Source:HGNC Symbol;Acc:HGNC:11422]
1913	ENSBTAG00000004111	ENSBTAG00000004111	1913.1.1	LRRC45	ENSG00000169683	leucine rich repeat containing 45 [Source:HGNC Symbol;Acc:HGNC:28302]
1914	ENSBTAG00000004112	ENSBTAG00000004112	1914.1.1	GAMT	ENSG00000130005	guanidinoacetate N-methyltransferase [Source:HGNC Symbol;Acc:HGNC:4136]
1915	ENSBTAG00000004114	ENSBTAG00000004114	1915.1.1	MAP3K11	ENSG00000173327	mitogen-activated protein kinase kinase kinase 11 [Source:HGNC Symbol;Acc:HGNC:6850]
1916	ENSBTAG00000004115	ENSBTAG00000004115	1916.1.1	MYLIP	ENSG00000007944	myosin regulatory light chain interacting protein [Source:HGNC Symbol;Acc:HGNC:21155]
1917	ENSBTAG00000004117	ENSBTAG00000004117	1917.1.1	AZI2	ENSG00000163512	5-azacytidine induced 2 [Source:HGNC Symbol;Acc:HGNC:24002]
1918	ENSBTAG00000004118	ENSBTAG00000004118	1918.1.1	ALAS1	ENSG00000023330	5'-aminolevulinate synthase 1 [Source:HGNC Symbol;Acc:HGNC:396]
1919	ENSBTAG00000004120	ENSBTAG00000004120	1919.1.1	HEMK1	ENSG00000114735	HemK methyltransferase family member 1 [Source:HGNC Symbol;Acc:HGNC:24923]
1920	ENSBTAG00000004124	ENSBTAG00000004124	1920.1.1	CPOX	ENSG00000080819	coproporphyrinogen oxidase [Source:HGNC Symbol;Acc:HGNC:2321]
1921	ENSBTAG00000004126	ENSBTAG00000004126	1921.1.1	MLF1	ENSG00000178053	myeloid leukemia factor 1 [Source:HGNC Symbol;Acc:HGNC:7125]
1922	ENSBTAG00000004135	ENSBTAG00000004135	1922.1.1	LMTK2	ENSG00000164715	lemur tyrosine kinase 2 [Source:HGNC Symbol;Acc:HGNC:17880]
1923	ENSBTAG00000004136	ENSBTAG00000004136	1923.1.1	NFE2L3	ENSG00000050344	NFE2 like bZIP transcription factor 3 [Source:HGNC Symbol;Acc:HGNC:7783]
1924	ENSBTAG00000004138	ENSBTAG00000004138	1924.1.1	BICRA	ENSG00000063169	BRD4 interacting chromatin remodeling complex associated protein [Source:HGNC Symbol;Acc:HGNC:4332]
1925	ENSBTAG00000004139	ENSBTAG00000004139	1925.1.1	BACH1	ENSG00000156273	BTB domain and CNC homolog 1 [Source:HGNC Symbol;Acc:HGNC:935]
1926	ENSBTAG00000004145	ENSBTAG00000004145	1926.1.1	ANO4	ENSG00000151572	anoctamin 4 [Source:HGNC Symbol;Acc:HGNC:23837]
1927	ENSBTAG00000004147	ENSBTAG00000004147	1927.1.1	FBH1	ENSG00000134452	F-box DNA helicase 1 [Source:HGNC Symbol;Acc:HGNC:13620]
1928	ENSBTAG00000004154	ENSBTAG00000004154	1928.1.1	SKIL	ENSG00000136603	SKI like proto-oncogene [Source:HGNC Symbol;Acc:HGNC:10897]
1929	ENSBTAG00000004155	ENSBTAG00000004155	1929.1.1	SPATA20	ENSG00000006282	spermatogenesis associated 20 [Source:HGNC Symbol;Acc:HGNC:26125]
1930	ENSBTAG00000004161	ENSBTAG00000004161	1930.1.1	UBE2D2	ENSG00000131508	ubiquitin conjugating enzyme E2 D2 [Source:HGNC Symbol;Acc:HGNC:12475]
1931	ENSBTAG00000004165	ENSBTAG00000004165	1931.1.1	CLYBL	ENSG00000125246	citramalyl-CoA lyase [Source:HGNC Symbol;Acc:HGNC:18355]
1932	ENSBTAG00000004168	ENSBTAG00000004168	1932.1.1	STON1	ENSG00000243244	stonin 1 [Source:HGNC Symbol;Acc:HGNC:17003]
1933	ENSBTAG00000004171	ENSBTAG00000004171	1933.1.1	GPHN	ENSG00000171723	gephyrin [Source:HGNC Symbol;Acc:HGNC:15465]
1934	ENSBTAG00000004172	ENSBTAG00000004172	1934.1.1	SETD1B	ENSG00000139718	SET domain containing 1B, histone lysine methyltransferase [Source:HGNC Symbol;Acc:HGNC:29187]
1935	ENSBTAG00000004173	ENSBTAG00000004173	1935.1.1	UBXN8	ENSG00000104691	UBX domain protein 8 [Source:HGNC Symbol;Acc:HGNC:30307]
1936	ENSBTAG00000004176	ENSBTAG00000004176	1936.1.1	PDC	ENSG00000116703	phosducin [Source:HGNC Symbol;Acc:HGNC:8759]
1937	ENSBTAG00000004177	ENSBTAG00000004177	1937.1.1	TANC1	ENSG00000115183	tetratricopeptide repeat, ankyrin repeat and coiled-coil containing 1 [Source:HGNC Symbol;Acc:HGNC:29364]
1938	ENSBTAG00000004178	ENSBTAG00000004178	1938.1.1	ACOX2	ENSG00000168306	acyl-CoA oxidase 2 [Source:HGNC Symbol;Acc:HGNC:120]
1939	ENSBTAG00000004179	ENSBTAG00000004179	1939.1.1	PSMD9	ENSG00000110801	proteasome 26S subunit, non-ATPase 9 [Source:HGNC Symbol;Acc:HGNC:9567]
1940	ENSBTAG00000004184	ENSBTAG00000004184	1940.1.1	WDSUB1	ENSG00000196151	WD repeat, sterile alpha motif and U-box domain containing 1 [Source:HGNC Symbol;Acc:HGNC:26697]
1941	ENSBTAG00000004188	ENSBTAG00000004188	1941.1.1	SNAP47	ENSG00000143740	synaptosome associated protein 47 [Source:HGNC Symbol;Acc:HGNC:30669]
1942	ENSBTAG00000004189	ENSBTAG00000004189	1942.1.1	MLXIP	ENSG00000175727	MLX interacting protein [Source:HGNC Symbol;Acc:HGNC:17055]
1943	ENSBTAG00000004190	ENSBTAG00000004190	1943.1.1	ARHGAP29	ENSG00000137962	Rho GTPase activating protein 29 [Source:HGNC Symbol;Acc:HGNC:30207]
1944	ENSBTAG00000004191	ENSBTAG00000004191	1944.1.1	JMJD4	ENSG00000081692	jumonji domain containing 4 [Source:HGNC Symbol;Acc:HGNC:25724]
1945	ENSBTAG00000004193	ENSBTAG00000004193	1945.1.1	VEZF1	ENSG00000136451	vascular endothelial zinc finger 1 [Source:HGNC Symbol;Acc:HGNC:12949]
1946	ENSBTAG00000004194	ENSBTAG00000004194	1946.1.1	RALGDS	ENSG00000160271	ral guanine nucleotide dissociation stimulator [Source:HGNC Symbol;Acc:HGNC:9842]
1947	ENSBTAG00000004196	ENSBTAG00000004196	1947.1.1	FMNL1	ENSG00000184922	formin like 1 [Source:HGNC Symbol;Acc:HGNC:1212]
1948	ENSBTAG00000004199	ENSBTAG00000004199	1948.1.1	DIABLO	ENSG00000184047	diablo IAP-binding mitochondrial protein [Source:HGNC Symbol;Acc:HGNC:21528]
1949	ENSBTAG00000004200	ENSBTAG00000004200	1949.1.1	GTPBP3	ENSG00000130299	GTP binding protein 3, mitochondrial [Source:HGNC Symbol;Acc:HGNC:14880]
1950	ENSBTAG00000004203	ENSBTAG00000004203	1950.1.1	VPS33A	ENSG00000139719	VPS33A core subunit of CORVET and HOPS complexes [Source:HGNC Symbol;Acc:HGNC:18179]
1951	ENSBTAG00000004204	ENSBTAG00000004204	1951.1.1	GPR107	ENSG00000148358	G protein-coupled receptor 107 [Source:HGNC Symbol;Acc:HGNC:17830]
1952	ENSBTAG00000004206	ENSBTAG00000004206	1952.1.1	LRRC55	ENSG00000183908	leucine rich repeat containing 55 [Source:HGNC Symbol;Acc:HGNC:32324]
1953	ENSBTAG00000004207	ENSBTAG00000004207	1953.1.1	CD93	ENSG00000125810	CD93 molecule [Source:HGNC Symbol;Acc:HGNC:15855]
1954	ENSBTAG00000004208	ENSBTAG00000004208	1954.1.1	PLEKHG6	ENSG00000008323	pleckstrin homology and RhoGEF domain containing G6 [Source:HGNC Symbol;Acc:HGNC:25562]
1955	ENSBTAG00000004211	ENSBTAG00000004211	1955.1.1	TNFRSF1A	ENSG00000067182	TNF receptor superfamily member 1A [Source:HGNC Symbol;Acc:HGNC:11916]
1956	ENSBTAG00000004215	ENSBTAG00000004215	1956.1.1	RARRES2	ENSG00000106538	retinoic acid receptor responder 2 [Source:HGNC Symbol;Acc:HGNC:9868]
1957	ENSBTAG00000004216	ENSBTAG00000004216	1957.1.1	MAP3K2	ENSG00000169967	mitogen-activated protein kinase kinase kinase 2 [Source:HGNC Symbol;Acc:HGNC:6854]
1958	ENSBTAG00000004221	ENSBTAG00000004221	1958.1.1	ESM1	ENSG00000164283	endothelial cell specific molecule 1 [Source:HGNC Symbol;Acc:HGNC:3466]
1959	ENSBTAG00000004222	ENSBTAG00000004222	1959.1.1	SAT2	ENSG00000141504	spermidine/spermine N1-acetyltransferase family member 2 [Source:HGNC Symbol;Acc:HGNC:23160]
1960	ENSBTAG00000004223	ENSBTAG00000004223	1960.1.1	SRR	ENSG00000167720	serine racemase [Source:HGNC Symbol;Acc:HGNC:14398]
1961	ENSBTAG00000004225	ENSBTAG00000004225	1961.1.1	TSR1	ENSG00000167721	TSR1 ribosome maturation factor [Source:HGNC Symbol;Acc:HGNC:25542]
1962	ENSBTAG00000004227	ENSBTAG00000004227	1962.1.1	TBCK	ENSG00000145348	TBC1 domain containing kinase [Source:HGNC Symbol;Acc:HGNC:28261]
1963	ENSBTAG00000004230	ENSBTAG00000004230	1963.1.1	AIMP1	ENSG00000164022	aminoacyl tRNA synthetase complex interacting multifunctional protein 1 [Source:HGNC Symbol;Acc:HGNC:10648]
1964	ENSBTAG00000004231	ENSBTAG00000004231	1964.1.1	GPM6A	ENSG00000150625	glycoprotein M6A [Source:HGNC Symbol;Acc:HGNC:4460]
1965	ENSBTAG00000004237	ENSBTAG00000004237	1965.1.1	BTC	ENSG00000174808	betacellulin [Source:HGNC Symbol;Acc:HGNC:1121]
1966	ENSBTAG00000004238	ENSBTAG00000004238	1966.1.1	TACC1	ENSG00000147526	transforming acidic coiled-coil containing protein 1 [Source:HGNC Symbol;Acc:HGNC:11522]
1967	ENSBTAG00000004240	ENSBTAG00000004240	1967.1.1	TMPO	ENSG00000120802	thymopoietin [Source:HGNC Symbol;Acc:HGNC:11875]
1968	ENSBTAG00000004242	ENSBTAG00000004242	1968.1.1	ARPC1A	ENSG00000241685	actin related protein 2/3 complex subunit 1A [Source:HGNC Symbol;Acc:HGNC:703]
1969	ENSBTAG00000004243	ENSBTAG00000004243	1969.1.1	LYPLA1	ENSG00000120992	lysophospholipase 1 [Source:HGNC Symbol;Acc:HGNC:6737]
1970	ENSBTAG00000004248	ENSBTAG00000004248	1970.1.1	MLYCD	ENSG00000103150	malonyl-CoA decarboxylase [Source:HGNC Symbol;Acc:HGNC:7150]
1971	ENSBTAG00000004249	ENSBTAG00000004249	1971.1.1	TANC2	ENSG00000170921	tetratricopeptide repeat, ankyrin repeat and coiled-coil containing 2 [Source:HGNC Symbol;Acc:HGNC:30212]
1972	ENSBTAG00000004256	ENSBTAG00000004256	1972.1.1	ODC1	ENSG00000115758	ornithine decarboxylase 1 [Source:HGNC Symbol;Acc:HGNC:8109]
1973	ENSBTAG00000004257	ENSBTAG00000004257	1973.1.1	TAF4B	ENSG00000141384	TATA-box binding protein associated factor 4b [Source:HGNC Symbol;Acc:HGNC:11538]
1974	ENSBTAG00000004258	ENSBTAG00000004258	1974.1.1	EEF2	ENSG00000167658	eukaryotic translation elongation factor 2 [Source:HGNC Symbol;Acc:HGNC:3214]
1975	ENSBTAG00000004259	ENSBTAG00000004259	1975.1.1	HPCAL1	ENSG00000115756	hippocalcin like 1 [Source:HGNC Symbol;Acc:HGNC:5145]
1976	ENSBTAG00000004261	ENSBTAG00000004261	1976.1.1	SPON2	ENSG00000159674	spondin 2 [Source:HGNC Symbol;Acc:HGNC:11253]
1977	ENSBTAG00000004268	ENSBTAG00000004268	1977.1.1	TRAPPC5	ENSG00000181029	trafficking protein particle complex subunit 5 [Source:HGNC Symbol;Acc:HGNC:23067]
1978	ENSBTAG00000004269	ENSBTAG00000004269	1978.1.1	SGK1	ENSG00000118515	serum/glucocorticoid regulated kinase 1 [Source:HGNC Symbol;Acc:HGNC:10810]
1979	ENSBTAG00000004270	ENSBTAG00000004270	1979.1.1	FCER2	ENSG00000104921	Fc epsilon receptor II [Source:HGNC Symbol;Acc:HGNC:3612]
1980	ENSBTAG00000004271	ENSBTAG00000004271	1980.1.1	UBAP2L	ENSG00000143569	ubiquitin associated protein 2 like [Source:HGNC Symbol;Acc:HGNC:29877]
1982	ENSBTAG00000004275	ENSBTAG00000004275	1982.1.1	DKK3	ENSG00000050165	dickkopf WNT signaling pathway inhibitor 3 [Source:HGNC Symbol;Acc:HGNC:2893]
1983	ENSBTAG00000004277	ENSBTAG00000004277	1983.1.1	EVC2	ENSG00000173040	EvC ciliary complex subunit 2 [Source:HGNC Symbol;Acc:HGNC:19747]
1984	ENSBTAG00000004278	ENSBTAG00000004278	1984.1.1	APMAP	ENSG00000101474	adipocyte plasma membrane associated protein [Source:HGNC Symbol;Acc:HGNC:13238]
1985	ENSBTAG00000004279	ENSBTAG00000004279	1985.1.1	RHOA	ENSG00000067560	ras homolog family member A [Source:HGNC Symbol;Acc:HGNC:667]
1986	ENSBTAG00000004281	ENSBTAG00000004281	1986.1.1	ACSS1	ENSG00000154930	acyl-CoA synthetase short chain family member 1 [Source:HGNC Symbol;Acc:HGNC:16091]
1987	ENSBTAG00000004282	ENSBTAG00000004282	1987.1.1	AMBRA1	ENSG00000110497	autophagy and beclin 1 regulator 1 [Source:HGNC Symbol;Acc:HGNC:25990]
1988	ENSBTAG00000004283	ENSBTAG00000004283	1988.1.1	PPFIBP1	ENSG00000110841	PPFIA binding protein 1 [Source:HGNC Symbol;Acc:HGNC:9249]
1989	ENSBTAG00000004284	ENSBTAG00000004284	1989.1.1	UFD1	ENSG00000070010	ubiquitin recognition factor in ER associated degradation 1 [Source:HGNC Symbol;Acc:HGNC:12520]
1990	ENSBTAG00000004286	ENSBTAG00000004286	1990.1.1	CDC45	ENSG00000093009	cell division cycle 45 [Source:HGNC Symbol;Acc:HGNC:1739]
1991	ENSBTAG00000004287	ENSBTAG00000004287	1991.1.1	EVC	ENSG00000072840	EvC ciliary complex subunit 1 [Source:HGNC Symbol;Acc:HGNC:3497]
1992	ENSBTAG00000004288	ENSBTAG00000004288	1992.1.1	GSTA4	ENSG00000170899	glutathione S-transferase alpha 4 [Source:HGNC Symbol;Acc:HGNC:4629]
1993	ENSBTAG00000004290	ENSBTAG00000004290	1993.1.1	DDX28	ENSG00000182810	DEAD-box helicase 28 [Source:HGNC Symbol;Acc:HGNC:17330]
1994	ENSBTAG00000004294	ENSBTAG00000004294	1994.1.1	EVI5L	ENSG00000142459	ecotropic viral integration site 5 like [Source:HGNC Symbol;Acc:HGNC:30464]
1995	ENSBTAG00000004295	ENSBTAG00000004295	1995.1.1	NDUFA8	ENSG00000119421	NADH:ubiquinone oxidoreductase subunit A8 [Source:HGNC Symbol;Acc:HGNC:7692]
1996	ENSBTAG00000004300	ENSBTAG00000004300	1996.1.1	LRRC8E	ENSG00000171017	leucine rich repeat containing 8 VRAC subunit E [Source:HGNC Symbol;Acc:HGNC:26272]
1997	ENSBTAG00000004302	ENSBTAG00000004302	1997.1.1	NDUFAF5	ENSG00000101247	NADH:ubiquinone oxidoreductase complex assembly factor 5 [Source:HGNC Symbol;Acc:HGNC:15899]
1998	ENSBTAG00000004305	ENSBTAG00000004305	1998.1.1	RGS16	ENSG00000143333	regulator of G protein signaling 16 [Source:HGNC Symbol;Acc:HGNC:9997]
1999	ENSBTAG00000004307	ENSBTAG00000004307	1999.1.1	VPS36	ENSG00000136100	vacuolar protein sorting 36 homolog [Source:HGNC Symbol;Acc:HGNC:20312]
2000	ENSBTAG00000004310	ENSBTAG00000004310	2000.1.1	UBR7	ENSG00000012963	ubiquitin protein ligase E3 component n-recognin 7 [Source:HGNC Symbol;Acc:HGNC:20344]
2001	ENSBTAG00000004315	ENSBTAG00000004315	2001.1.1	HDLBP	ENSG00000115677	high density lipoprotein binding protein [Source:HGNC Symbol;Acc:HGNC:4857]
2002	ENSBTAG00000004316	ENSBTAG00000004316	2002.1.1	BOD1L1	ENSG00000038219	biorientation of chromosomes in cell division 1 like 1 [Source:HGNC Symbol;Acc:HGNC:31792]
2003	ENSBTAG00000004318	ENSBTAG00000004318	2003.1.1	ARL3	ENSG00000138175	ADP ribosylation factor like GTPase 3 [Source:HGNC Symbol;Acc:HGNC:694]
2004	ENSBTAG00000004321	ENSBTAG00000004321	2004.1.1	SFXN2	ENSG00000156398	sideroflexin 2 [Source:HGNC Symbol;Acc:HGNC:16086]
2005	ENSBTAG00000004322	ENSBTAG00000004322	2005.1.1	FOS	ENSG00000170345	Fos proto-oncogene, AP-1 transcription factor subunit [Source:HGNC Symbol;Acc:HGNC:3796]
2006	ENSBTAG00000004328	ENSBTAG00000004328	2006.1.1	CHST10	ENSG00000115526	carbohydrate sulfotransferase 10 [Source:HGNC Symbol;Acc:HGNC:19650]
2007	ENSBTAG00000004329	ENSBTAG00000004329	2007.1.1	RELL1	ENSG00000181826	RELT like 1 [Source:HGNC Symbol;Acc:HGNC:27379]
2008	ENSBTAG00000004330	ENSBTAG00000004330	2008.1.1	ENO4	ENSG00000188316	enolase 4 [Source:HGNC Symbol;Acc:HGNC:31670]
2009	ENSBTAG00000004333	ENSBTAG00000004333	2009.1.1	COPA	ENSG00000122218	COPI coat complex subunit alpha [Source:HGNC Symbol;Acc:HGNC:2230]
2010	ENSBTAG00000004334	ENSBTAG00000004334	2010.1.1	NCSTN	ENSG00000162736	nicastrin [Source:HGNC Symbol;Acc:HGNC:17091]
2011	ENSBTAG00000004337	ENSBTAG00000004337	2011.1.1	PDE1B	ENSG00000123360	phosphodiesterase 1B [Source:HGNC Symbol;Acc:HGNC:8775]
2012	ENSBTAG00000004343	ENSBTAG00000004343	2012.1.1	CCS	ENSG00000173992	copper chaperone for superoxide dismutase [Source:HGNC Symbol;Acc:HGNC:1613]
2013	ENSBTAG00000004344	ENSBTAG00000004344	2013.1.1	ACSL1	ENSG00000151726	acyl-CoA synthetase long chain family member 1 [Source:HGNC Symbol;Acc:HGNC:3569]
2014	ENSBTAG00000004347	ENSBTAG00000004347	2014.1.1	ADGRF5	ENSG00000069122	adhesion G protein-coupled receptor F5 [Source:HGNC Symbol;Acc:HGNC:19030]
2015	ENSBTAG00000004348	ENSBTAG00000004348	2015.1.1	MRPL21	ENSG00000197345	mitochondrial ribosomal protein L21 [Source:HGNC Symbol;Acc:HGNC:14479]
2016	ENSBTAG00000004349	ENSBTAG00000004349	2016.1.1	DAZAP2	ENSG00000183283	DAZ associated protein 2 [Source:HGNC Symbol;Acc:HGNC:2684]
2017	ENSBTAG00000004356	ENSBTAG00000004356	2017.1.1	ROBO4	ENSG00000154133	roundabout guidance receptor 4 [Source:HGNC Symbol;Acc:HGNC:17985]
2018	ENSBTAG00000004358	ENSBTAG00000004358	2018.1.1	DARS2	ENSG00000117593	aspartyl-tRNA synthetase 2, mitochondrial [Source:HGNC Symbol;Acc:HGNC:25538]
2019	ENSBTAG00000004361	ENSBTAG00000004361	2019.1.1	ZBTB37	ENSG00000185278	zinc finger and BTB domain containing 37 [Source:HGNC Symbol;Acc:HGNC:28365]
2020	ENSBTAG00000004362	ENSBTAG00000004362	2020.1.1	SERPINC1	ENSG00000117601	serpin family C member 1 [Source:HGNC Symbol;Acc:HGNC:775]
2021	ENSBTAG00000004364	ENSBTAG00000004364	2021.1.1	THNSL2	ENSG00000144115	threonine synthase like 2 [Source:HGNC Symbol;Acc:HGNC:25602]
2022	ENSBTAG00000004367	ENSBTAG00000004367	2022.1.1	COQ10A	ENSG00000135469	coenzyme Q10A [Source:HGNC Symbol;Acc:HGNC:26515]
2023	ENSBTAG00000004368	ENSBTAG00000004368	2023.1.1	NFATC3	ENSG00000072736	nuclear factor of activated T cells 3 [Source:HGNC Symbol;Acc:HGNC:7777]
2024	ENSBTAG00000004371	ENSBTAG00000004371	2024.1.1	CS	ENSG00000062485	citrate synthase [Source:HGNC Symbol;Acc:HGNC:2422]
2025	ENSBTAG00000004374	ENSBTAG00000004374	2025.1.1	CNPY2	ENSG00000257727	canopy FGF signaling regulator 2 [Source:HGNC Symbol;Acc:HGNC:13529]
2026	ENSBTAG00000004375	ENSBTAG00000004375	2026.1.1	ESRP2	ENSG00000103067	epithelial splicing regulatory protein 2 [Source:HGNC Symbol;Acc:HGNC:26152]
2027	ENSBTAG00000004376	ENSBTAG00000004376	2027.1.1	PAN2	ENSG00000135473	poly(A) specific ribonuclease subunit PAN2 [Source:HGNC Symbol;Acc:HGNC:20074]
2028	ENSBTAG00000004377	ENSBTAG00000004377	2028.1.1	PHLDB3	ENSG00000176531	pleckstrin homology like domain family B member 3 [Source:HGNC Symbol;Acc:HGNC:30499]
2029	ENSBTAG00000004378	ENSBTAG00000004378	2029.1.1	IL23A	ENSG00000110944	interleukin 23 subunit alpha [Source:HGNC Symbol;Acc:HGNC:15488]
2030	ENSBTAG00000004379	ENSBTAG00000004379	2030.1.1	ETHE1	ENSG00000105755	ETHE1 persulfide dioxygenase [Source:HGNC Symbol;Acc:HGNC:23287]
2031	ENSBTAG00000004380	ENSBTAG00000004380	2031.1.1	STAT2	ENSG00000170581	signal transducer and activator of transcription 2 [Source:HGNC Symbol;Acc:HGNC:11363]
2032	ENSBTAG00000004381	ENSBTAG00000004381	2032.1.1	TACSTD2	ENSG00000184292	tumor associated calcium signal transducer 2 [Source:HGNC Symbol;Acc:HGNC:11530]
2033	ENSBTAG00000004383	ENSBTAG00000004383	2033.1.1	FNBP1L	ENSG00000137942	formin binding protein 1 like [Source:HGNC Symbol;Acc:HGNC:20851]
2034	ENSBTAG00000004387	ENSBTAG00000004387	2034.1.1	MTPAP	ENSG00000107951	mitochondrial poly(A) polymerase [Source:HGNC Symbol;Acc:HGNC:25532]
2035	ENSBTAG00000004388	ENSBTAG00000004388	2035.1.1	SLITRK6	ENSG00000184564	SLIT and NTRK like family member 6 [Source:HGNC Symbol;Acc:HGNC:23503]
2036	ENSBTAG00000004392	ENSBTAG00000004392	2036.1.1	C11orf24	ENSG00000171067	chromosome 11 open reading frame 24 [Source:HGNC Symbol;Acc:HGNC:1174]
2037	ENSBTAG00000004394	ENSBTAG00000004394	2037.1.1	PKIB	ENSG00000135549	cAMP-dependent protein kinase inhibitor beta [Source:HGNC Symbol;Acc:HGNC:9018]
2038	ENSBTAG00000004398	ENSBTAG00000004398	2038.1.1	IMMP2L	ENSG00000184903	inner mitochondrial membrane peptidase subunit 2 [Source:HGNC Symbol;Acc:HGNC:14598]
2039	ENSBTAG00000004399	ENSBTAG00000004399	2039.1.1	LRRN3	ENSG00000173114	leucine rich repeat neuronal 3 [Source:HGNC Symbol;Acc:HGNC:17200]
2040	ENSBTAG00000004400	ENSBTAG00000004400	2040.1.1	PRRC2B	ENSG00000288701	proline rich coiled-coil 2B [Source:HGNC Symbol;Acc:HGNC:28121]
2041	ENSBTAG00000004401	ENSBTAG00000004401	2041.1.1	UGGT2	ENSG00000102595	UDP-glucose glycoprotein glucosyltransferase 2 [Source:HGNC Symbol;Acc:HGNC:15664]
2042	ENSBTAG00000004402	ENSBTAG00000004402	2042.1.1	PRELID3B	ENSG00000101166	PRELI domain containing 3B [Source:HGNC Symbol;Acc:HGNC:15892]
2043	ENSBTAG00000004403	ENSBTAG00000004403	2043.1.1	CD320	ENSG00000167775	CD320 molecule [Source:HGNC Symbol;Acc:HGNC:16692]
2044	ENSBTAG00000004406	ENSBTAG00000004406	2044.1.1	MSI2	ENSG00000153944	musashi RNA binding protein 2 [Source:HGNC Symbol;Acc:HGNC:18585]
2045	ENSBTAG00000004407	ENSBTAG00000004407	2045.1.1	KCNK2	ENSG00000082482	potassium two pore domain channel subfamily K member 2 [Source:HGNC Symbol;Acc:HGNC:6277]
2046	ENSBTAG00000004409	ENSBTAG00000004409	2046.1.1	IVD	ENSG00000128928	isovaleryl-CoA dehydrogenase [Source:HGNC Symbol;Acc:HGNC:6186]
2047	ENSBTAG00000004411	ENSBTAG00000004411	2047.1.1	CRISPLD1	ENSG00000121005	cysteine rich secretory protein LCCL domain containing 1 [Source:HGNC Symbol;Acc:HGNC:18206]
2048	ENSBTAG00000004413	ENSBTAG00000004413	2048.1.1	RHOBTB3	ENSG00000164292	Rho related BTB domain containing 3 [Source:HGNC Symbol;Acc:HGNC:18757]
2049	ENSBTAG00000004416	ENSBTAG00000004416	2049.1.1	NUDC	ENSG00000090273	nuclear distribution C, dynein complex regulator [Source:HGNC Symbol;Acc:HGNC:8045]
2050	ENSBTAG00000004420	ENSBTAG00000004420	2050.1.1	BAHD1	ENSG00000140320	bromo adjacent homology domain containing 1 [Source:HGNC Symbol;Acc:HGNC:29153]
2052	ENSBTAG00000004422	ENSBTAG00000004422	2052.1.1	ALG14	ENSG00000172339	ALG14 UDP-N-acetylglucosaminyltransferase subunit [Source:HGNC Symbol;Acc:HGNC:28287]
2053	ENSBTAG00000004423	ENSBTAG00000004423	2053.1.1	ARHGAP42	ENSG00000165895	Rho GTPase activating protein 42 [Source:HGNC Symbol;Acc:HGNC:26545]
2054	ENSBTAG00000004426	ENSBTAG00000004426	2054.1.1	DNAJB14	ENSG00000164031	DnaJ heat shock protein family (Hsp40) member B14 [Source:HGNC Symbol;Acc:HGNC:25881]
2055	ENSBTAG00000004427	ENSBTAG00000004427	2055.1.1	OSBPL8	ENSG00000091039	oxysterol binding protein like 8 [Source:HGNC Symbol;Acc:HGNC:16396]
2056	ENSBTAG00000004430	ENSBTAG00000004430	2056.1.1	SGPP1	ENSG00000126821	sphingosine-1-phosphate phosphatase 1 [Source:HGNC Symbol;Acc:HGNC:17720]
2057	ENSBTAG00000004436	ENSBTAG00000004436	2057.1.1	PPT2	ENSG00000221988	palmitoyl-protein thioesterase 2 [Source:HGNC Symbol;Acc:HGNC:9326]
2058	ENSBTAG00000004438	ENSBTAG00000004438	2058.1.1	XPNPEP1	ENSG00000108039	X-prolyl aminopeptidase 1 [Source:HGNC Symbol;Acc:HGNC:12822]
2059	ENSBTAG00000004442	ENSBTAG00000004442	2059.1.1	AGPAT1	ENSG00000204310	1-acylglycerol-3-phosphate O-acyltransferase 1 [Source:HGNC Symbol;Acc:HGNC:324]
2060	ENSBTAG00000004448	ENSBTAG00000004448	2060.1.1	CKAP5	ENSG00000175216	cytoskeleton associated protein 5 [Source:HGNC Symbol;Acc:HGNC:28959]
2061	ENSBTAG00000004449	ENSBTAG00000004449	2061.1.1	DGKE	ENSG00000153933	diacylglycerol kinase epsilon [Source:HGNC Symbol;Acc:HGNC:2852]
2062	ENSBTAG00000004452	ENSBTAG00000004452	2062.1.1	IPO9	ENSG00000198700	importin 9 [Source:HGNC Symbol;Acc:HGNC:19425]
2063	ENSBTAG00000004457	ENSBTAG00000004457	2063.1.1	ORAI1	ENSG00000276045	ORAI calcium release-activated calcium modulator 1 [Source:HGNC Symbol;Acc:HGNC:25896]
2064	ENSBTAG00000004458	ENSBTAG00000004458	2064.1.1	MORN3	ENSG00000139714	MORN repeat containing 3 [Source:HGNC Symbol;Acc:HGNC:29807]
2065	ENSBTAG00000004459	ENSBTAG00000004459	2065.1.1	TMEM45A	ENSG00000181458	transmembrane protein 45A [Source:HGNC Symbol;Acc:HGNC:25480]
2066	ENSBTAG00000004460	ENSBTAG00000004460	2066.1.1	RFWD3	ENSG00000168411	ring finger and WD repeat domain 3 [Source:HGNC Symbol;Acc:HGNC:25539]
2067	ENSBTAG00000004462	ENSBTAG00000004462	2067.1.1	NPAS3	ENSG00000151322	neuronal PAS domain protein 3 [Source:HGNC Symbol;Acc:HGNC:19311]
2068	ENSBTAG00000004463	ENSBTAG00000004463	2068.1.1	KDELR1	ENSG00000105438	KDEL endoplasmic reticulum protein retention receptor 1 [Source:HGNC Symbol;Acc:HGNC:6304]
2069	ENSBTAG00000004471	ENSBTAG00000004471	2069.1.1	ST3GAL6	ENSG00000064225	ST3 beta-galactoside alpha-2,3-sialyltransferase 6 [Source:HGNC Symbol;Acc:HGNC:18080]
2070	ENSBTAG00000004476	ENSBTAG00000004476	2070.1.1	ADHFE1	ENSG00000147576	alcohol dehydrogenase iron containing 1 [Source:HGNC Symbol;Acc:HGNC:16354]
[truncated: 9,729 more rows]
