# Supplementary material for: Bridging GWAS to genes: an integrative multi-omics approach using cattle data
Source: Research Square preprint supplement (doi:10.21203/rs.3.rs-7693421/v1), 2025-10-14
Supplement: Supplementary file 2 [file 1c62a301e9f44bd31b9dde0a.xlsx]

## Sheet: Additionalfile2
Additional file 2. GSOR analyses using WBC RNAseq data (Correlation between WBC gene expression and local GEBV for milk lactose percentage)
Chr	Start(bp)	End(bp)	Ensembl_ID	GeneName	beta	SE	Pvalue	FDR(BH)	OverlapWithGWAS(loci)
1	882081	1002223	ENSBTAG00000020035	RCAN1	-0.703	0.294	0.0163951	0.152243	0
1	1102887	1118312	ENSBTAG00000011528	SMIM11A	0.063	0.126	0.617075	0.879151	0
1	1390803	1455219	ENSBTAG00000012594	MRPS6	-0.076	0.095	0.423711	0.777237	0
1	1643628	1651039	ENSBTAG00000018278	ATP5PO	0.018	0.138	0.896566	0.976232	0
1	1665339	1908788	ENSBTAG00000021997	ITSN1	0.055	0.109	0.613559	0.878435	0
1	1909498	1943914	ENSBTAG00000008490	CRYZL1	-0.319	0.22	0.161513	0.515199	0
1	1942815	1954023	ENSBTAG00000035175	DONSON	0.374	0.198	0.0574331	0.316615	0
1	1954230	1985068	ENSBTAG00000008482	SON	0.226	0.187	0.230139	0.597314	0
1	1985522	2012383	ENSBTAG00000009188	GART	0.561	0.295	0.0574331	0.316615	0
1	2028900	2030042	ENSBTAG00000009187	DNAJC28	-0.338	0.157	0.0278069	0.208236	0
1	2046733	2083566	ENSBTAG00000001258	TMEM50B	0.083	0.197	0.673755	0.904303	0
1	2098968	2124278	ENSBTAG00000012899	IFNGR2	-0.049	0.178	0.783316	0.938781	0
1	2189895	2218344	ENSBTAG00000021819	IFNAR1	0.072	0.126	0.568	0.857575	0
1	2242523	2314142	ENSBTAG00000019404	IL10RB	-0.224	0.195	0.271332	0.633529	0
1	2315596	2350090	ENSBTAG00000015212	IFNAR2	-0.128	0.19	0.500311	0.823949	0
1	2506295	2508518	ENSBTAG00000054023		0.002	0.06	0.973675	0.992841	0
1	2786812	2819637	ENSBTAG00000003064	PAXBP1	0.112	0.171	0.512468	0.829477	0
1	2827691	2916599	ENSBTAG00000003063	SYNJ1	0.168	0.174	0.334044	0.718774	0
1	2924656	2936276	ENSBTAG00000003059	CFAP298	0.1	0.228	0.660662	0.89827	0
1	2978428	3080528	ENSBTAG00000017310	EVA1C	0.119	0.119	0.317311	0.70242	0
1	3103263	3180340	ENSBTAG00000012412	URB1	0.177	0.226	0.433627	0.783504	0
1	3209824	3222938	ENSBTAG00000016619	MIS18A	-0.283	0.126	0.0278069	0.208236	0
1	3501645	3629427	ENSBTAG00000020762	HUNK	0.282	0.075	0.000144696	0.00458058	0
1	3760509	3822150	ENSBTAG00000018855	SCAF4	0.06	0.286	0.833668	0.95544	0
1	3824601	3833406	ENSBTAG00000018854	SOD1	-0.153	0.147	0.317311	0.70242	0
1	4192104	4358253	ENSBTAG00000017839	TIAM1	0.07	0.076	0.35705	0.730773	0
1	4381315	4431774	ENSBTAG00000048631		0.155	0.166	0.350304	0.726093	0
1	6815185	6858058	ENSBTAG00000004139	BACH1	0.039	0.087	0.654153	0.896618	0
1	7114205	7127950	ENSBTAG00000014233	CCT8	0.565	0.25	0.0214482	0.177124	0
1	7129414	7155271	ENSBTAG00000020122	USP16	0.228	0.202	0.271332	0.633529	0
1	7167841	7170830	ENSBTAG00000020121	RWDD2B	0.299	0.247	0.230139	0.597314	0
1	7183913	7240822	ENSBTAG00000000201	LTN1	0.003	0.125	0.980853	0.994015	0
1	7259998	7280970	ENSBTAG00000001412	N6AMT1	0.227	0.134	0.0891309	0.393847	0
1	10231296	10543984	ENSBTAG00000017753	APP	0.357	0.135	0.00932238	0.106629	0
1	10656634	10691694	ENSBTAG00000019043	GABPA	0.3	0.179	0.0891309	0.393847	0
1	10690694	10698960	ENSBTAG00000000605	ATP5PF	-0.214	0.153	0.161513	0.515199	0
1	10702387	10787934	ENSBTAG00000000603	JAM2	-0.173	0.041	2.66915e-05	0.00112661	0
1	10823242	10849340	ENSBTAG00000019542	MRPL39	0.043	0.219	0.84461	0.95828	0
1	19227894	19256713	ENSBTAG00000001395	C1H21orf91	0.053	0.089	0.551175	0.850493	0
1	19417655	19437170	ENSBTAG00000018704	BTG3	-0.24	0.176	0.161513	0.515199	0
1	19437777	19502580	ENSBTAG00000004869	CXADR	-0.2	0.068	0.00373163	0.0560907	0
1	21167188	21328190	ENSBTAG00000019314	USP25	0.397	0.154	0.00932238	0.106629	0
1	22093841	22189794	ENSBTAG00000052575		0.046	0.072	0.522823	0.834706	0
1	22189815	22193285	ENSBTAG00000047293	NRIP1	0.07	0.083	0.399228	0.760597	0
1	22617489	22675629	ENSBTAG00000002623	SAMSN1	0.167	0.142	0.230139	0.597314	0
1	22783876	22794051	ENSBTAG00000012908	HSPA13	-0.045	0.133	0.735363	0.924275	0
1	22807642	22906567	ENSBTAG00000054574		-0.065	0.067	0.332046	0.718014	0
1	22948185	22967236	ENSBTAG00000034347	RBM11	0.156	0.064	0.0163951	0.152243	0
1	23043555	23044082	ENSBTAG00000038422		0.021	0.076	0.782548	0.938758	0
1	29107326	29419066	ENSBTAG00000036262	GBE1	0.182	0.208	0.381574	0.750692	0
1	35381297	35415198	ENSBTAG00000007939	CHMP2B	-0.259	0.167	0.109599	0.430698	0
1	36058732	36063724	ENSBTAG00000046959	CGGBP1	-0.033	0.154	0.830547	0.95433	0
1	36063528	36147146	ENSBTAG00000023675	ZNF654	0.016	0.114	0.88866	0.97482	0
1	36156437	36162573	ENSBTAG00000007970	C1H3orf38	-0.013	0.211	0.950563	0.987127	0
1	38275588	38352554	ENSBTAG00000005155	ARL13B	0.211	0.15	0.161513	0.515199	0
1	38360629	38420853	ENSBTAG00000015728	NSUN3	0.262	0.161	0.109599	0.430698	0
1	42010599	42049950	ENSBTAG00000010091	ARL6	0.375	0.129	0.00373163	0.0560907	0
1	42070368	42196081	ENSBTAG00000047147	CRYBG3	0.006	0.058	0.917963	0.98263	0
1	42194819	42230806	ENSBTAG00000015546	RIOX2	0.085	0.204	0.676678	0.905416	0
1	42822730	42830190	ENSBTAG00000020996	CLDND1	-0.349	0.221	0.109599	0.430698	0
1	42839325	42840401	ENSBTAG00000020997	GPR15	-0.109	0.129	0.398111	0.759853	0
1	42888156	42901415	ENSBTAG00000004124	CPOX	0.012	0.184	0.948174	0.986579	0
1	42936757	42941412	ENSBTAG00000023666		-0.04	0.052	0.441893	0.788439	0
1	43047976	43111603	ENSBTAG00000004471	ST3GAL6	0.087	0.192	0.650549	0.895496	0
1	43112237	43195312	ENSBTAG00000014889	DCBLD2	0.079	0.14	0.572754	0.859371	0
1	44086074	44481342	ENSBTAG00000013663	CMSS1	0.097	0.138	0.482056	0.812238	0
1	44096867	44402309	ENSBTAG00000013664	FILIP1L	0.036	0.056	0.520224	0.833316	0
1	44554751	44611092	ENSBTAG00000015010	TBC1D23	0.219	0.147	0.133614	0.472094	0
1	44617553	44637448	ENSBTAG00000004833	NIT2	0.001	0.223	0.996808	0.999359	0
1	44650783	44687949	ENSBTAG00000014302	TOMM70	-0.083	0.199	0.676678	0.905416	0
1	44688566	44729118	ENSBTAG00000034442	LNP1	-0.058	0.098	0.553851	0.851061	0
1	45155599	45188354	ENSBTAG00000016363	TFG	0.105	0.29	0.717352	0.918844	0
1	45743519	45816098	ENSBTAG00000015662	IMPG2	0.126	0.083	0.133614	0.472094	0
1	45816823	45988234	ENSBTAG00000016932	SENP7	0.281	0.151	0.0574331	0.316615	0
1	45964099	45969615	ENSBTAG00000018731		0.195	0.127	0.133614	0.472094	0
1	45988289	45992514	ENSBTAG00000024027	TRMT10C	0.272	0.149	0.0718606	0.354245	0
1	46001965	46016856	ENSBTAG00000015069	PCNP	0.123	0.223	0.580948	0.863291	0
1	46028911	46058876	ENSBTAG00000013460	ZBTB11	0.162	0.13	0.230139	0.597314	0
1	46061453	46066949	ENSBTAG00000013461	RPL24	-0.044	0.106	0.678142	0.906213	0
1	46077322	46098614	ENSBTAG00000013464	CEP97	0.138	0.1	0.161513	0.515199	0
1	46114976	46166455	ENSBTAG00000013465	NXPE3	0.211	0.159	0.193601	0.557799	0
1	46138494	46139246	ENSBTAG00000048517		0.018	0.084	0.830547	0.95433	0
1	46190242	46201247	ENSBTAG00000010987	NFKBIZ	0.164	0.152	0.271332	0.633529	0
1	49930775	50160291	ENSBTAG00000000088	ALCAM	-0.103	0.108	0.340084	0.722638	0
1	50258002	50481552	ENSBTAG00000013057	CBLB	-0.068	0.111	0.539876	0.844825	0
1	52133128	52430797	ENSBTAG00000006893	BBX	0.014	0.132	0.915582	0.981507	0
1	52712128	52777176	ENSBTAG00000003585	CD47	0.197	0.177	0.271332	0.633529	0
1	52879903	52953508	ENSBTAG00000005787	IFT57	-0.45	0.158	0.00511026	0.0707089	0
1	53314658	53338782	ENSBTAG00000017140	CIP2A	0.036	0.132	0.784853	0.939545	0
1	53353203	53467047	ENSBTAG00000006158	DZIP3	0.027	0.111	0.808005	0.946473	0
1	53561497	53563094	ENSBTAG00000049130		-0.192	0.119	0.109599	0.430698	0
1	53578753	53626469	ENSBTAG00000049108	TRAT1	0.063	0.101	0.532628	0.84104	0
1	54226950	54227678	ENSBTAG00000022275		-0.06	0.073	0.411077	0.769718	0
1	54849145	54849575	ENSBTAG00000055085		0.171	0.142	0.230139	0.597314	0
1	55457926	55458564	ENSBTAG00000033360		-0.029	0.087	0.739134	0.92436	0
1	56306180	56403972	ENSBTAG00000014441	CD96	-0.068	0.107	0.524776	0.83644	0
1	56425478	56476144	ENSBTAG00000012646	PLCXD2	0.014	0.06	0.815761	0.94979	0
1	56737576	56750712	ENSBTAG00000004601	ABHD10	0.121	0.198	0.5412	0.846261	0
1	56929578	56944529	ENSBTAG00000048550	GCSAM	-0.029	0.108	0.78793	0.940355	0
1	57126575	57147988	ENSBTAG00000033319	CD200	0.155	0.084	0.0718606	0.354245	0
1	57228945	57261728	ENSBTAG00000011871	BTLA	0.126	0.103	0.230139	0.597314	0
1	57309120	57343709	ENSBTAG00000009084	ATG3	-0.074	0.154	0.630516	0.88562	0
1	57343853	57364455	ENSBTAG00000009085	SLC35A5	0.042	0.188	0.823536	0.95256	0
1	57364375	57478155	ENSBTAG00000010793	CCDC80	0.012	0.056	0.830547	0.95433	0
1	57570680	57586854	ENSBTAG00000040144		0.084	0.12	0.483927	0.813751	0
1	57639751	57681112	ENSBTAG00000001235	CD200R1L	0.291	0.149	0.0455003	0.279604	0
1	57707956	57727875	ENSBTAG00000006534	GTPBP8	0.03	0.107	0.779478	0.938307	0
1	57725471	57740983	ENSBTAG00000005723	NEPRO	0.606	0.186	0.000966848	0.0204391	0
1	57798617	57799321	ENSBTAG00000000242		-0.062	0.04	0.109599	0.430698	0
1	58141829	58199879	ENSBTAG00000013937	SPICE1	1.2	0.205	3.63502e-09	4.21931e-07	0
1	58218879	58326309	ENSBTAG00000013292	SIDT1	0.181	0.102	0.0718606	0.354245	0
1	58345399	58392043	ENSBTAG00000021000	USF3	0.083	0.063	0.193601	0.557799	0
1	58402278	58433748	ENSBTAG00000007784	NAA50	-0.042	0.23	0.854798	0.963491	0
1	58434456	58495220	ENSBTAG00000002703	ATP6V1A	0.093	0.186	0.617075	0.879151	0
1	58518934	58618308	ENSBTAG00000004971	GRAMD1C	-0.417	0.131	0.00137428	0.0266686	0
1	58619102	58629385	ENSBTAG00000004974	ZDHHC23	0.038	0.108	0.724838	0.920719	0
1	58637237	58735117	ENSBTAG00000004975	CCDC191	-0.081	0.177	0.646952	0.893882	0
1	58735307	58761901	ENSBTAG00000004977	QTRT2	-0.301	0.21	0.161513	0.515199	0
1	58926907	58945271	ENSBTAG00000011921	TIGIT	0.386	0.165	0.0214482	0.177124	0
1	58975735	59030035	ENSBTAG00000011928	ZBTB20	0.075	0.055	0.161513	0.515199	0
1	64019141	64049977	ENSBTAG00000001390	B4GALT4	0.214	0.241	0.374541	0.743978	0
1	64083127	64203306	ENSBTAG00000000210	ARHGAP31	-0.141	0.111	0.193601	0.557799	0
1	64211525	64240562	ENSBTAG00000000213	TMEM39A	-0.699	0.323	0.0278069	0.208236	0
1	64246626	64269696	ENSBTAG00000008562	POGLUT1	0.193	0.159	0.230139	0.597314	0
1	64275417	64295231	ENSBTAG00000012581	TIMMDC1	-0.051	0.219	0.815761	0.94979	0
1	64301489	64323696	ENSBTAG00000018059	CD80	-0.209	0.16	0.193601	0.557799	0
1	64334745	64377235	ENSBTAG00000009391	ADPRH	-0.326	0.194	0.0891309	0.393847	0
1	64425088	64432940	ENSBTAG00000002182	COX17	0.162	0.102	0.109599	0.430698	0
1	64451181	64565304	ENSBTAG00000001293	CFAP91	-0.112	0.12	0.35082	0.726562	0
1	64646190	64861271	ENSBTAG00000048057	GSK3B	-0.024	0.132	0.855583	0.963491	0
1	65078552	65096582	ENSBTAG00000033170	LRRC58	-0.046	0.075	0.539876	0.844825	0
1	65138529	65198315	ENSBTAG00000022155	FSTL1	-0.169	0.098	0.0891309	0.393847	0
1	65318371	65324506	ENSBTAG00000015892	NDUFB4	-0.04	0.114	0.725588	0.921111	0
1	65387679	65433970	ENSBTAG00000015898	RABL3	-0.181	0.154	0.230139	0.597314	0
1	65433369	65474553	ENSBTAG00000016848	GTF2E1	-0.021	0.228	0.926698	0.982999	0
1	65944699	66053204	ENSBTAG00000001920	POLQ	-0.182	0.12	0.133614	0.472094	0
1	66095751	66108659	ENSBTAG00000014508	FBXO40	0.233	0.121	0.0574331	0.316615	0
1	66112082	66145729	ENSBTAG00000001009	HCLS1	-0.67	0.307	0.0278069	0.208236	0
1	66151427	66215030	ENSBTAG00000008862	GOLGB1	0.031	0.121	0.797951	0.943512	0
1	66248439	66293959	ENSBTAG00000013069	IQCB1	-0.191	0.15	0.193601	0.557799	0
1	66294136	66349798	ENSBTAG00000013070	EAF2	-0.124	0.102	0.230139	0.597314	0
1	66482692	66608853	ENSBTAG00000004705	ILDR1	0.12	0.068	0.0718606	0.354245	0
1	66543642	66610926	ENSBTAG00000013118	CD86	-0.002	0.16	0.989628	0.997104	0
1	66796530	66819338	ENSBTAG00000054520	CCDC58	0.135	0.119	0.271332	0.633529	0
1	66820312	66861495	ENSBTAG00000011140	FAM162A	0.136	0.134	0.317311	0.70242	0
1	66864803	66866398	ENSBTAG00000054326	WDR5B	0.126	0.181	0.486429	0.815987	0
1	66875768	66944339	ENSBTAG00000011143	KPNA1	0.015	0.208	0.942602	0.98569	0
1	66958506	66988476	ENSBTAG00000021791	PARP9	0.04	0.203	0.843828	0.958086	0
1	66988057	66996322	ENSBTAG00000009933	DTX3L	-0.105	0.128	0.412216	0.769781	0
1	67012287	67058498	ENSBTAG00000016656	PARP14	-0.041	0.137	0.76494	0.934581	0
1	67055375	67120252	ENSBTAG00000005066	HSPBAP1	0.798	0.256	0.00193521	0.0343136	0
1	67121600	67210214	ENSBTAG00000005071	SLC49A4	0.057	0.153	0.709148	0.915728	0
1	67239728	67280749	ENSBTAG00000018765	SEMA5B	-0.161	0.049	0.000966848	0.0204391	0
1	67411430	67504231	ENSBTAG00000018877	PDIA5	-0.233	0.171	0.161513	0.515199	0
1	67555432	67637451	ENSBTAG00000014797	SEC22A	0.242	0.215	0.271332	0.633529	0
1	67866129	67952810	ENSBTAG00000023607	HACD2	0.036	0.169	0.831327	0.954526	0
1	67982278	68068472	ENSBTAG00000014567	MYLK	0.065	0.062	0.317311	0.70242	0
1	68289450	68332524	ENSBTAG00000000566	CCDC14	-0.193	0.156	0.230139	0.597314	0
1	68984705	69120012	ENSBTAG00000053238		-0.006	0.145	0.967296	0.990526	0
1	69127863	69178521	ENSBTAG00000013727	UMPS	0.065	0.219	0.766467	0.934581	0
1	69196881	69312128	ENSBTAG00000013755	ITGB5	0.014	0.084	0.86737	0.966262	0
1	69332534	69349823	ENSBTAG00000010382	MUC13	-0.181	0.072	0.0124193	0.127509	0
1	69354079	69357386	ENSBTAG00000048794		0.019	0.026	0.464779	0.802434	0
1	69422854	69525187	ENSBTAG00000021396	HEG1	0.047	0.078	0.546509	0.84853	0
1	69686148	69766359	ENSBTAG00000050482	ZNF148	0.165	0.132	0.230139	0.597314	0
1	69887221	69946638	ENSBTAG00000011383	SNX4	-0.057	0.192	0.766467	0.934581	0
1	69962379	70053523	ENSBTAG00000006471	OSBPL11	-0.024	0.179	0.893403	0.975753	0
1	70125517	70172948	ENSBTAG00000044172	LMLN	0.033	0.109	0.76189	0.932993	0
1	70176689	70180132	ENSBTAG00000014208	RPL35A	-0.038	0.082	0.643364	0.892269	0
1	70180444	70226096	ENSBTAG00000018025	IQCG	0.084	0.093	0.366526	0.737641	0
1	70229447	70335542	ENSBTAG00000032839	LRCH3	0.053	0.13	0.683274	0.909098	0
1	70257291	70257370	ENSBTAG00000054586		-0.042	0.056	0.453255	0.796468	0
1	70342777	70373184	ENSBTAG00000014874	FYTTD1	0.108	0.143	0.450249	0.794863	1
1	70372268	70433147	ENSBTAG00000001890	RUBCN	-0.114	0.125	0.361769	0.735027	1
1	70600179	70627585	ENSBTAG00000021364	TNK2	-0.086	0.123	0.484552	0.814364	0
1	70640306	70641382	ENSBTAG00000049459		-0.002	0.08	0.980055	0.99401	0
1	70652654	70679923	ENSBTAG00000032719	TFRC	0.102	0.115	0.375079	0.744339	0
1	70789424	70802153	ENSBTAG00000021515	ZDHHC19	-0.25	0.133	0.0574331	0.316615	0
1	70824603	70878013	ENSBTAG00000016979	PCYT1A	0.165	0.121	0.161513	0.515199	0
1	70881969	70909767	ENSBTAG00000032684	TCTEX1D2	0.125	0.126	0.321198	0.708024	0
1	70913018	70922405	ENSBTAG00000040161		0.043	0.079	0.586441	0.865611	0
1	70935047	70987415	ENSBTAG00000007577	UBXN7	0.2	0.104	0.0574331	0.316615	0
1	71020360	71048691	ENSBTAG00000013317	RNF168	0.279	0.159	0.0718606	0.354245	0
1	71087882	71101117	ENSBTAG00000014660	WDR53	0.148	0.189	0.433627	0.783504	0
1	71101138	71112719	ENSBTAG00000006388	FBXO45	0.098	0.127	0.440114	0.787282	0
1	71155752	71182955	ENSBTAG00000009614	NRROS	-0.537	0.222	0.0163951	0.152243	1
1	71223038	71228675	ENSBTAG00000013192	CEP19	0.177	0.179	0.322663	0.709632	1
1	71229011	71238780	ENSBTAG00000049165		-0.038	0.096	0.692105	0.911081	1
1	71232257	71252236	ENSBTAG00000048195	PIGX	0.346	0.158	0.0278069	0.208236	0
1	71257814	71346318	ENSBTAG00000047856	PAK2	0.826	0.235	0.000465258	0.0112163	0
1	71370900	71400231	ENSBTAG00000032674	SENP5	0.089	0.107	0.405409	0.7662	0
1	71404768	71410588	ENSBTAG00000008873	NCBP2	-0.53	0.138	0.000144696	0.00458058	0
1	71410763	71411062	ENSBTAG00000048390	NCBP2AS2	-0.029	0.085	0.733104	0.923823	0
1	71513093	71780855	ENSBTAG00000020378	DLG1	0.249	0.13	0.0574331	0.316615	1
1	71964668	72000537	ENSBTAG00000000448	BDH1	0.034	0.103	0.7414	0.925163	0
1	72100094	72118577	ENSBTAG00000006724	PPP1R2	0.245	0.149	0.109599	0.430698	0
1	72150081	72264225	ENSBTAG00000003378	ACAP2	0.141	0.093	0.133614	0.472094	0
1	72278287	72317902	ENSBTAG00000054986	ACAP2	0.154	0.107	0.161513	0.515199	0
1	72326705	72499174	ENSBTAG00000014564	XXYLT1	-0.925	0.243	0.000144696	0.00458058	0
1	72861563	72862834	ENSBTAG00000008462	FAM43A	-0.05	0.12	0.676678	0.905416	0
1	72877165	72901758	ENSBTAG00000008461	LSG1	0.096	0.37	0.795635	0.942552	0
1	73048103	73125832	ENSBTAG00000013204	ATP13A3	0.085	0.084	0.317311	0.70242	0
1	73132670	73134289	ENSBTAG00000013203	GP5	0.017	0.045	0.705431	0.915264	0
1	73253996	73257620	ENSBTAG00000048497		-0.079	0.095	0.405409	0.7662	0
1	73362759	73365438	ENSBTAG00000000569	HES1	0.072	0.143	0.614964	0.879151	0
1	73771857	73856448	ENSBTAG00000019514	OPA1	0.443	0.242	0.0718606	0.354245	0
1	74489024	74609955	ENSBTAG00000005430	MB21D2	-0.136	0.087	0.109599	0.430698	0
1	75926837	76006093	ENSBTAG00000006945	CCDC50	0.046	0.196	0.814209	0.94904	0
1	76065896	76102113	ENSBTAG00000018703	OSTN	0.112	0.088	0.193601	0.557799	0
1	76577593	76723526	ENSBTAG00000013205	IL1RAP	-0.188	0.079	0.0163951	0.152243	0
1	77130100	77309576	ENSBTAG00000021025	P3H2	0.11	0.051	0.0278069	0.208236	0
1	77389337	77689118	ENSBTAG00000015460	TP63	0.085	0.061	0.161513	0.515199	0
1	78452386	79136219	ENSBTAG00000044001	LPP	-0.145	0.115	0.193601	0.557799	0
1	79558314	79611183	ENSBTAG00000001511	BCL6	-0.206	0.103	0.0455003	0.279604	0
1	79911983	79916543	ENSBTAG00000032265	RTP4	0.061	0.106	0.565291	0.856477	0
1	80194829	80267738	ENSBTAG00000010357	ST6GAL1	0.386	0.161	0.0163951	0.152243	0
1	80452885	80467441	ENSBTAG00000014727	RFC4	0.303	0.183	0.0891309	0.393847	0
1	80467443	80473754	ENSBTAG00000014724	EIF4A2	0.174	0.243	0.473991	0.808429	0
1	80611849	80618915	ENSBTAG00000000522	AHSG	-0.029	0.028	0.317311	0.70242	0
1	80643739	80661936	ENSBTAG00000003151	DNAJB11	0.091	0.192	0.6355	0.887646	0
1	80666383	80688899	ENSBTAG00000003143	TBCCD1	0.487	0.248	0.0455003	0.279604	0
1	80873608	81097089	ENSBTAG00000005091	DGKG	-0.078	0.062	0.193601	0.557799	0
1	81135305	81194599	ENSBTAG00000014915	ETV5	-0.113	0.101	0.271332	0.633529	0
1	81254282	81273853	ENSBTAG00000011305		0.082	0.049	0.0891309	0.393847	0
1	81287578	81307980	ENSBTAG00000001697	TRA2B	0.216	0.308	0.483303	0.813028	0
1	81586790	81621312	ENSBTAG00000001749	SENP2	-0.207	0.177	0.230139	0.597314	0
1	81696499	81706039	ENSBTAG00000017115	TMEM41A	-0.19	0.278	0.494607	0.822006	0
1	81711839	81868201	ENSBTAG00000017103	MAP3K13	-0.113	0.113	0.317311	0.70242	0
1	81877674	81931209	ENSBTAG00000019625	EHHADH	0.893	0.158	1.19807e-08	1.28368e-06	0
1	81956536	81960076	ENSBTAG00000007296		0.024	0.12	0.841481	0.957155	1
1	81984064	82104798	ENSBTAG00000005212	C1H3orf70	-0.127	0.113	0.271332	0.633529	1
1	82116216	82377026	ENSBTAG00000005209	VPS8	-0.475	0.263	0.0718606	0.354245	0
1	82384309	82406799	ENSBTAG00000050932		-0.232	0.116	0.0455003	0.279604	0
1	82499645	82501239	ENSBTAG00000019014	MAGEF1	0.161	0.162	0.320223	0.707243	0
1	82824296	82829473	ENSBTAG00000040199	POLR2H	0.448	0.175	0.00932238	0.106629	0
1	82830348	82844401	ENSBTAG00000012284	CLCN2	-0.161	0.078	0.0357288	0.242894	0
1	82845021	82851428	ENSBTAG00000012273	FAM131A	0.671	0.203	0.000966848	0.0204391	0
1	82854035	82872768	ENSBTAG00000012881	EIF4G1	-0.08	0.263	0.761128	0.932516	0
1	82878892	82888239	ENSBTAG00000005660	PSMD2	0.763	0.284	0.00693395	0.0881582	0
1	82920059	82927198	ENSBTAG00000051586	ECE2	0.261	0.164	0.109599	0.430698	0
1	82927910	82933513	ENSBTAG00000005652	ALG3	0.207	0.195	0.271332	0.633529	0
1	82960351	82968194	ENSBTAG00000006920	ABCF3	0.827	0.343	0.0163951	0.152243	0
1	82970702	82977115	ENSBTAG00000020106	AP2M1	0.531	0.235	0.0214482	0.177124	0
1	82981845	82996905	ENSBTAG00000019336	DVL3	-0.596	0.191	0.00193521	0.0343136	0
1	83002134	83012323	ENSBTAG00000011414	EIF2B5	0.57	0.336	0.0891309	0.393847	0
1	83030383	83035642	ENSBTAG00000040304		-0.087	0.063	0.161513	0.515199	0
1	83122147	83205242	ENSBTAG00000017666	ABCC5	-0.302	0.109	0.00511026	0.0707089	0
1	83246423	83301299	ENSBTAG00000014460	PARL	0.436	0.248	0.0718606	0.354245	0
1	83304567	83311791	ENSBTAG00000014459	MAP6D1	-0.499	0.105	1.58666e-06	9.47158e-05	0
1	83313948	83416551	ENSBTAG00000014451	YEATS2	-0.51	0.198	0.00932238	0.106629	0
1	83419537	83420366	ENSBTAG00000014449		-0.006	0.085	0.943398	0.985783	0
1	83449266	83481681	ENSBTAG00000017450	KLHL24	-0.254	0.1	0.0124193	0.127509	0
1	83545202	83598532	ENSBTAG00000037951	KLHL6	-0.145	0.189	0.443082	0.789211	0
1	83653154	83911446	ENSBTAG00000010394	MCF2L2	-0.123	0.069	0.0718606	0.354245	0
1	83752076	83827942	ENSBTAG00000010397	B3GNT5	-0.162	0.161	0.317311	0.70242	0
1	83922240	83951783	ENSBTAG00000006552	LAMP3	0.254	0.186	0.161513	0.515199	0
1	83960686	84019357	ENSBTAG00000006548	MCCC1	0.4	0.278	0.161513	0.515199	0
1	84042262	84074786	ENSBTAG00000012797	DCUN1D1	-0.137	0.17	0.420243	0.775414	0
1	84108412	84205584	ENSBTAG00000000290	ATP11B	-0.158	0.119	0.193601	0.557799	0
1	86035467	86040735	ENSBTAG00000023513	DNAJC19	0.056	0.166	0.736117	0.924275	0
1	86047794	86121242	ENSBTAG00000016457	FXR1	0.097	0.228	0.670837	0.902803	0
1	86372984	86382674	ENSBTAG00000001968	TTC14	-0.093	0.139	0.503495	0.825506	0
1	87355950	87482259	ENSBTAG00000005946	USP13	-0.114	0.109	0.317311	0.70242	0
1	87503557	87518661	ENSBTAG00000002463	NDUFB5	0.167	0.119	0.161513	0.515199	0
1	87518534	87536139	ENSBTAG00000002462	MRPL47	0.367	0.186	0.0455003	0.279604	0
1	87536382	87567798	ENSBTAG00000002460	ACTL6A	0.061	0.23	0.791009	0.941074	0
1	87648347	87716734	ENSBTAG00000002767	GNB4	-0.105	0.084	0.230139	0.597314	0
1	87721169	87765315	ENSBTAG00000010485	MFN1	-0.246	0.169	0.133614	0.472094	0
1	87780857	87785489	ENSBTAG00000037393	ZNF639	0.076	0.202	0.706917	0.915581	0
1	87793359	87870663	ENSBTAG00000009235	KCNMB3	-0.202	0.134	0.133614	0.472094	0
1	87879574	87964195	ENSBTAG00000009232	PIK3CA	-0.337	0.136	0.0124193	0.127509	1
1	88005930	88038010	ENSBTAG00000012463	ZMAT3	-0.112	0.078	0.161513	0.515199	0
1	88340909	88350179	ENSBTAG00000035144	PLCXD1	-0.192	0.131	0.133614	0.472094	0
1	88354297	88362389	ENSBTAG00000054315	GTPBP6	0.066	0.216	0.759605	0.932289	0
1	88367544	88407508	ENSBTAG00000052803		0.011	0.175	0.949767	0.987127	0
1	90030089	90204389	ENSBTAG00000021910	TBL1XR1	-0.142	0.112	0.193601	0.557799	0
1	90203158	90207592	ENSBTAG00000054926		0.004	0.151	0.979257	0.99401	0
1	94709117	94769544	ENSBTAG00000023814	ECT2	0.22	0.141	0.109599	0.430698	0
1	94818555	94882838	ENSBTAG00000020073	NCEH1	0.176	0.169	0.317311	0.70242	0
1	94985031	95001222	ENSBTAG00000018994	TNFSF10	-0.048	0.119	0.686948	0.910604	0
1	95029121	95032760	ENSBTAG00000010874	GHSR	-0.052	0.079	0.510538	0.829029	0
1	95121236	95406498	ENSBTAG00000019376	FNDC3B	0.086	0.094	0.360192	0.732775	0
1	95742044	95963408	ENSBTAG00000017490	PLD1	0	0.076	1	1	0
1	96022258	96299999	ENSBTAG00000049814		-0.12	0.108	0.271332	0.633529	0
1	96158154	96158791	ENSBTAG00000051079	TMSB4	0.009	0.075	0.904483	0.978478	0
1	96395573	96426824	ENSBTAG00000011742	TNIK	-0.198	0.148	0.193601	0.557799	0
1	96398536	96399909	ENSBTAG00000050747		-0.032	0.045	0.477084	0.80941	0
1	96540992	96557978	ENSBTAG00000010550	EIF5A2	-0.192	0.101	0.0574331	0.316615	0
1	96572443	96576821	ENSBTAG00000007394	RPL22L1	0.098	0.126	0.436569	0.784635	0
1	97035501	97055587	ENSBTAG00000004154	SKIL	-0.298	0.109	0.00693395	0.0881582	0
1	97057201	97058241	ENSBTAG00000049676		-0.156	0.076	0.0357288	0.242894	0
1	97094274	97163222	ENSBTAG00000001403	PRKCI	-0.181	0.101	0.0718606	0.354245	0
1	97196214	97271658	ENSBTAG00000013938	PHC3	-0.084	0.073	0.230139	0.597314	0
1	97281198	97282211	ENSBTAG00000048011	GPR160	-0.02	0.104	0.847742	0.960009	0
1	97388346	97421921	ENSBTAG00000039442	SEC62	-0.002	0.185	0.991223	0.997189	0
1	97587928	97604139	ENSBTAG00000013142	MYNN	-0.445	0.184	0.0163951	0.152243	0
1	97604626	97610506	ENSBTAG00000013141	ACTRT3	-0.174	0.148	0.230139	0.597314	0
1	99361283	99445684	ENSBTAG00000018727	GOLIM4	-0.311	0.127	0.0163951	0.152243	0
1	99660456	99743550	ENSBTAG00000012708	SERPINI1	-0.082	0.134	0.540538	0.845437	0
1	99744376	99804996	ENSBTAG00000031709	PDCD10	-0.144	0.152	0.343639	0.722795	0
1	104351156	104351809	ENSBTAG00000027213		0.046	0.074	0.533942	0.841949	0
1	106150166	106186579	ENSBTAG00000016228	NMD3	-0.058	0.195	0.766467	0.934581	0
1	106796683	106797258	ENSBTAG00000049656		-0.07	0.106	0.509254	0.828554	0
1	106924853	107002190	ENSBTAG00000017416	KPNA4	-0.32	0.202	0.109599	0.430698	0
1	106970727	106971049	ENSBTAG00000045275		0.023	0.042	0.583692	0.8643	0
1	107030008	107042373	ENSBTAG00000008078	TRIM59	0.053	0.123	0.666468	0.901473	0
1	107045175	107078624	ENSBTAG00000005862	SMC4	0.182	0.139	0.193601	0.557799	0
1	107094668	107209406	ENSBTAG00000031572	IFT80	0.033	0.158	0.834448	0.95544	0
1	107385860	107426856	ENSBTAG00000052570		0.267	0.184	0.133614	0.472094	0
1	108706429	108732991	ENSBTAG00000009263	MFSD1	-0.383	0.204	0.0574331	0.316615	0
1	108852511	108903175	ENSBTAG00000027795	GFM1	0.414	0.243	0.0891309	0.393847	0
1	108867031	108874756	ENSBTAG00000009336	LXN	-0.64	0.108	3.63502e-09	4.21931e-07	0
1	108967043	109414482	ENSBTAG00000031561	RSRC1	0.061	0.181	0.736117	0.924275	0
1	110158198	110164262	ENSBTAG00000009012	PTX3	0.011	0.032	0.730846	0.923112	0
1	110447554	110461439	ENSBTAG00000003851	CCNL1	-0.221	0.204	0.271332	0.633529	0
1	110575012	110642235	ENSBTAG00000018009		-0.408	0.075	6.66409e-08	5.60678e-06	0
1	110928202	110955891	ENSBTAG00000012120	TIPARP	-0.192	0.246	0.435391	0.783979	0
1	111095638	111107466	ENSBTAG00000018471	SSR3	0.18	0.187	0.335548	0.719539	0
1	111732900	111804777	ENSBTAG00000013013	GMPS	-0.045	0.23	0.84461	0.95828	0
1	111829274	111850038	ENSBTAG00000014318	SLC33A1	-0.301	0.28	0.271332	0.633529	0
1	113326569	113371550	ENSBTAG00000006142	DHX36	-0.649	0.183	0.000465258	0.0112163	0
1	114490631	114498974	ENSBTAG00000048392		0.077	0.08	0.335548	0.719539	0
1	114554443	114558377	ENSBTAG00000055257	RAP2B	0.47	0.294	0.109599	0.430698	0
1	114908447	114910097	ENSBTAG00000001465	P2RY1	-0.028	0.102	0.783316	0.938781	0
1	115303718	115524968	ENSBTAG00000004564	MBNL1	0.028	0.125	0.822757	0.952275	0
1	115938554	115949379	ENSBTAG00000053581	SUCNR1	0.056	0.087	0.519575	0.833022	0
1	116654940	117017533	ENSBTAG00000021703	MED12L	-0.129	0.099	0.193601	0.557799	0
1	116694941	116747192	ENSBTAG00000015837	P2RY12	-0.021	0.049	0.667923	0.901495	0
1	116756155	116798069	ENSBTAG00000011192	GPR87	-0.008	0.067	0.905275	0.978575	0
1	116847497	116879544	ENSBTAG00000020990	P2RY14	0.181	0.076	0.0163951	0.152243	0
1	116891760	116898285	ENSBTAG00000009848	GPR171	0.411	0.158	0.00932238	0.106629	0
1	117361864	117380735	ENSBTAG00000023445	SIAH2	0.03	0.251	0.904483	0.978478	0
1	117507281	117537602	ENSBTAG00000031435	SELENOT	0.175	0.23	0.446657	0.79254	0
1	117556623	117597952	ENSBTAG00000009106	EIF2A	0.05	0.229	0.827429	0.953982	0
1	117598268	117600549	ENSBTAG00000009104	SERP1	-0.39	0.277	0.161513	0.515199	0
1	117672585	117718237	ENSBTAG00000018402	TSC22D2	-0.594	0.208	0.00373163	0.0560907	0
1	118213388	118220074	ENSBTAG00000011150	PFN2	0.104	0.092	0.271332	0.633529	0
1	118223007	118350034	ENSBTAG00000011147	RNF13	0.005	0.203	0.980055	0.99401	0
1	118403615	118414343	ENSBTAG00000005068	COMMD2	-0.164	0.225	0.466002	0.803107	0
1	118901381	119012034	ENSBTAG00000012164	CP	-0.044	0.081	0.58713	0.865811	0
1	118969378	119046161	ENSBTAG00000002395	HPS3	-0.126	0.242	0.602367	0.874394	0
1	119074041	119137489	ENSBTAG00000019704	HLTF	0.341	0.139	0.0124193	0.127509	0
1	119150402	119191206	ENSBTAG00000001721	GYG1	0.117	0.226	0.604458	0.875705	0
1	119297388	119329547	ENSBTAG00000015008	CPA3	-0.046	0.067	0.492083	0.820094	0
1	121946372	121974115	ENSBTAG00000022227	PLSCR2	-0.726	0.123	3.63502e-09	4.21931e-07	0
1	122349984	122471157	ENSBTAG00000007331	PLOD2	0.058	0.044	0.193601	0.557799	0
1	124866092	124888751	ENSBTAG00000007933	DIPK2A	0.287	0.186	0.133614	0.472094	0
1	125042863	125706599	ENSBTAG00000031178	SLC9A9	-0.066	0.134	0.622013	0.881577	0
1	125870591	125874332	ENSBTAG00000011584	CHST2	0.332	0.143	0.0214482	0.177124	0
1	125961513	125987011	ENSBTAG00000009154	U2SURP	0.21	0.127	0.0891309	0.393847	0
1	126471505	126591861	ENSBTAG00000011529	ATR	0.087	0.145	0.548506	0.849422	0
1	126593243	126700958	ENSBTAG00000011524	XRN1	0.148	0.088	0.0891309	0.393847	0
1	126736159	126814507	ENSBTAG00000018138	GK5	0.236	0.132	0.0718606	0.354245	0
1	126884717	127026615	ENSBTAG00000006222	TFDP2	0.49	0.127	9.61927e-05	0.00331283	0
1	127050091	127086255	ENSBTAG00000014140	ATP1B3	0.061	0.16	0.703203	0.914361	0
1	127214846	127222120	ENSBTAG00000002185	RNF7	-0.262	0.179	0.133614	0.472094	0
1	127345515	127469070	ENSBTAG00000015413	RASA2	0.16	0.111	0.161513	0.515199	0
1	127530714	127574835	ENSBTAG00000040061	ZBTB38	0.065	0.126	0.605854	0.875705	0
1	127673805	127774738	ENSBTAG00000050763	PXYLP1	-0.102	0.107	0.34059	0.722638	0
1	128008638	128042419	ENSBTAG00000015310	SLC25A36	0.066	0.112	0.555861	0.851659	0
1	129414272	129535900	ENSBTAG00000051936		0.418	0.134	0.00193521	0.0343136	0
1	129706887	129741285	ENSBTAG00000014843	COPB2	0.085	0.302	0.77871	0.938194	0
1	129741091	129754572	ENSBTAG00000047608	MRPS22	-0.372	0.227	0.109599	0.430698	0
1	130075490	130076132	ENSBTAG00000051220		-0.113	0.097	0.230139	0.597314	0
1	130293099	130471254	ENSBTAG00000006909	PIK3CB	0.303	0.18	0.0891309	0.393847	0
1	130488923	130505304	ENSBTAG00000023426	FAIM	-0.065	0.128	0.611453	0.877625	0
1	130531395	130598375	ENSBTAG00000018538	CEP70	0.128	0.159	0.42082	0.775451	0
1	130610161	130664345	ENSBTAG00000008111	ESYT3	0.017	0.058	0.769522	0.935667	0
1	130707102	130773432	ENSBTAG00000001497	MRAS	-0.039	0.099	0.693581	0.911794	0
1	130822345	130930767	ENSBTAG00000019952	ARMC8	0.046	0.162	0.77641	0.937947	0
1	130942894	130955677	ENSBTAG00000019949	DBR1	0.308	0.22	0.161513	0.515199	0
1	132167385	132207262	ENSBTAG00000008299	IL20RB	-0.17	0.089	0.0574331	0.316615	0
1	132216626	132292949	ENSBTAG00000018427	NCK1	-0.048	0.226	0.832107	0.954809	0
1	132419127	132742565	ENSBTAG00000054797		-0.013	0.124	0.916376	0.981686	0
1	132757274	132922494	ENSBTAG00000035437	STAG1	0.004	0.193	0.983246	0.994511	0
1	132920382	133024359	ENSBTAG00000015221	PCCB	-0.023	0.198	0.907653	0.979636	0
1	132923969	132924157	ENSBTAG00000052750		-0.065	0.102	0.524125	0.836039	0
1	133084511	133113773	ENSBTAG00000000750	MSL2	-0.016	0.168	0.924315	0.982883	0
1	133116975	133350011	ENSBTAG00000023416	PPP2R3A	0.204	0.063	0.00137428	0.0266686	0
1	134765523	134838769	ENSBTAG00000007014	CEP63	0.044	0.208	0.832107	0.954809	0
1	134839356	134845010	ENSBTAG00000014461	ANAPC13	0.058	0.145	0.689157	0.910739	0
1	135082834	135191082	ENSBTAG00000016999	RYK	-0.4	0.222	0.0718606	0.354245	0
1	135532008	135573130	ENSBTAG00000044075	SRPRB	-0.917	0.18	3.39653e-07	2.35243e-05	0
1	135579069	135618070	ENSBTAG00000007273	TF	0.004	0.026	0.87761	0.971025	0
1	135753514	135824423	ENSBTAG00000000526	TOPBP1	-0.194	0.233	0.404845	0.766058	0
1	135867529	135881717	ENSBTAG00000035556	CDV3	0.229	0.324	0.479566	0.810877	0
1	135950798	136027624	ENSBTAG00000017659	BFSP2	0.09	0.11	0.413357	0.77042	0
1	136696251	136696592	ENSBTAG00000049044		0.006	0.068	0.929877	0.983625	0
1	136814837	136869560	ENSBTAG00000005769	NPHP3	0.186	0.14	0.193601	0.557799	0
1	136872755	136905496	ENSBTAG00000004495	UBA5	-1.4	0.215	8.032e-11	1.54906e-08	0
1	136905776	137025947	ENSBTAG00000031010	ACAD11	0.443	0.193	0.0214482	0.177124	0
1	137051554	137215251	ENSBTAG00000002966	DNAJC13	-0.324	0.153	0.0357288	0.242894	0
1	138384449	138441532	ENSBTAG00000030942	MRPL3	0.43	0.187	0.0214482	0.177124	0
1	138547391	138550417	ENSBTAG00000018749	NUDT16	-0.241	0.113	0.0357288	0.242894	0
1	138839426	138853788	ENSBTAG00000007462	ASTE1	0.302	0.207	0.133614	0.472094	0
1	138872223	139026120	ENSBTAG00000011626	ATP2C1	-0.463	0.243	0.0574331	0.316615	0
1	139225714	139238322	ENSBTAG00000013600	PSMG1	0.194	0.182	0.271332	0.633529	0
1	139238832	139362519	ENSBTAG00000013602	BRWD1	-0.079	0.124	0.524125	0.836039	0
1	139406045	139412414	ENSBTAG00000018768	HMGN1	0.148	0.185	0.423711	0.777237	0
1	139422600	139432042	ENSBTAG00000023106		0.237	0.129	0.0718606	0.354245	0
1	139443100	139458044	ENSBTAG00000013629	GET1	-0.059	0.175	0.736117	0.924275	0
1	139747766	139748825	ENSBTAG00000023407	B3GALT5	-0.063	0.059	0.271332	0.633529	0
1	141381147	141486921	ENSBTAG00000000394	BACE2	-0.127	0.068	0.0574331	0.316615	0
1	141551208	141617001	ENSBTAG00000030921	FAM3B	0.003	0.078	0.969688	0.991518	0
1	141621165	141658223	ENSBTAG00000008471	MX2	-0.1	0.064	0.109599	0.430698	0
1	141677687	141706496	ENSBTAG00000030913	MX1	-0.203	0.091	0.0278069	0.208236	0
1	141713171	141747814	ENSBTAG00000009132	TMPRSS2	-0.128	0.047	0.00693395	0.0881582	0
1	142065605	142132485	ENSBTAG00000021253	PRDM15	0.335	0.176	0.0574331	0.316615	0
1	142142610	142204837	ENSBTAG00000021259	C2CD2	-0.099	0.113	0.38103	0.750329	0
1	142235364	142253631	ENSBTAG00000030836	ZBTB21	-0.027	0.126	0.830547	0.95433	0
1	142488705	142561127	ENSBTAG00000021272	ABCG1	-0.023	0.104	0.825092	0.953217	0
1	142614729	142618268	ENSBTAG00000030814	TFF2	0.046	0.043	0.271332	0.633529	0
1	142694786	142737902	ENSBTAG00000023398	UBASH3A	0.216	0.173	0.230139	0.597314	0
1	142814827	142872558	ENSBTAG00000021286	SLC37A1	-0.146	0.206	0.478324	0.810308	0
1	142930579	143034932	ENSBTAG00000021899	PDE9A	-0.118	0.096	0.230139	0.597314	0
1	143087683	143108077	ENSBTAG00000021490	WDR4	-0.129	0.196	0.510538	0.829029	0
1	143119850	143131757	ENSBTAG00000021491	NDUFV3	0.356	0.228	0.109599	0.430698	0
1	143182017	143202288	ENSBTAG00000014153	PKNOX1	-0.479	0.316	0.133614	0.472094	0
1	143219189	143242441	ENSBTAG00000000160	CBS	0.103	0.14	0.461731	0.801143	0
1	143261977	143274941	ENSBTAG00000011645	U2AF1	0.108	0.153	0.480188	0.811053	0
1	143512564	143523992	ENSBTAG00000011437		-0.044	0.123	0.720343	0.920043	0
1	143641658	143729051	ENSBTAG00000017407	HSF2BP	-0.11	0.1	0.271332	0.633529	0
1	143729215	143755086	ENSBTAG00000017418	RRP1B	0.191	0.236	0.418515	0.773707	0
1	143782380	143810301	ENSBTAG00000018186	PDXK	0.038	0.097	0.695058	0.912191	0
1	143819489	143823793	ENSBTAG00000018189	CSTB	0.03	0.033	0.36335	0.735857	0
1	143846935	143850428	ENSBTAG00000000524	CSTB	0.155	0.104	0.133614	0.472094	0
1	143851101	143874772	ENSBTAG00000003981	RRP1	0.125	0.175	0.475227	0.809106	0
1	143941826	144025795	ENSBTAG00000020456	AGPAT3	0.006	0.19	0.974472	0.993008	0
1	144056126	144132832	ENSBTAG00000007100	TRAPPC10	-0.208	0.159	0.193601	0.557799	0
1	144134113	144147949	ENSBTAG00000007105		-0.003	0.21	0.98883	0.997102	0
1	144148919	144158060	ENSBTAG00000007106	GATD3A	0.04	0.158	0.800268	0.944559	0
1	144225436	144234833	ENSBTAG00000014880		-0.008	0.133	0.952156	0.987127	0
1	144308711	144335975	ENSBTAG00000010658	PFKL	0.13	0.153	0.395325	0.757999	0
1	144341397	144352212	ENSBTAG00000019589	CFAP410	0.05	0.144	0.728591	0.922495	0
1	144361187	144410547	ENSBTAG00000021901	TRPM2	0.276	0.134	0.0357288	0.242894	0
1	144659041	144684327	ENSBTAG00000048090	UBE2G2	-0.066	0.201	0.742912	0.925575	0
1	144687135	144696665	ENSBTAG00000017321	SUMO3	-0.005	0.196	0.979257	0.99401	0
1	144713171	144730575	ENSBTAG00000021771	PTTG1IP	-0.174	0.23	0.44905	0.794088	0
1	144759527	144789479	ENSBTAG00000017060	ITGB2	-0.334	0.212	0.109599	0.430698	0
1	144809574	144833722	ENSBTAG00000017010	FAM207A	-0.042	0.125	0.736871	0.924317	0
1	144937738	145050738	ENSBTAG00000017486	ADARB1	-0.087	0.085	0.317311	0.70242	0
1	145089416	145103157	ENSBTAG00000007818	POFUT2	-0.07	0.207	0.735363	0.924275	0
1	145202138	145296595	ENSBTAG00000023907	COL18A1	0.14	0.085	0.109599	0.430698	0
1	145299698	145325287	ENSBTAG00000024162	SLC19A1	-0.062	0.13	0.633362	0.887032	0
1	145395830	145625230	ENSBTAG00000030775	PCBP3	-0.213	0.12	0.0718606	0.354245	0
1	145668949	145687210	ENSBTAG00000011802	COL6A1	0.019	0.051	0.709148	0.915728	0
1	145807169	145837649	ENSBTAG00000019269	COL6A2	0.083	0.037	0.0278069	0.208236	0
1	145889102	145919613	ENSBTAG00000018936	LSS	0.105	0.219	0.631939	0.886128	0
1	145931228	145971979	ENSBTAG00000003148	MCM3AP	0.063	0.304	0.83601	0.95544	0
1	145972840	145977560	ENSBTAG00000003161	YBEY	0.022	0.197	0.910823	0.980261	0
1	146001886	146105891	ENSBTAG00000030670	PCNT	0.039	0.131	0.765703	0.934581	0
1	146121832	146241261	ENSBTAG00000011495	DIP2A	-0.091	0.152	0.549173	0.849825	0
1	146272607	146280008	ENSBTAG00000004777	S100B	-0.02	0.067	0.76494	0.934581	0
1	146320299	146345063	ENSBTAG00000005503	PRMT2	0.155	0.23	0.500311	0.823949	0
1	146528127	146556177	ENSBTAG00000007039	FBXO25	0.218	0.293	0.456876	0.798133	0
1	146975141	147244722	ENSBTAG00000004742	RUNX1	-0.072	0.112	0.520224	0.833316	0
1	148306238	148341194	ENSBTAG00000018682	SETD4	0.443	0.247	0.0718606	0.354245	0
1	148440558	148450711	ENSBTAG00000018688	CBR3	0.252	0.117	0.0278069	0.208236	0
1	148460221	148508639	ENSBTAG00000053201		-0.127	0.098	0.193601	0.557799	0
1	148516597	148594523	ENSBTAG00000014306	DOP1B	-0.283	0.149	0.0574331	0.316615	0
1	148604900	148639711	ENSBTAG00000011876	MORC3	-0.231	0.129	0.0718606	0.354245	0
1	148657613	148683915	ENSBTAG00000011880	CHAF1B	-0.068	0.262	0.794864	0.942261	0
1	149031196	149199816	ENSBTAG00000033679	HLCS	0.37	0.225	0.109599	0.430698	0
1	149301433	149317939	ENSBTAG00000055107	PIGP	0.188	0.173	0.271332	0.633529	0
1	149318018	149436586	ENSBTAG00000008167	TTC3	-0.166	0.146	0.271332	0.633529	0
1	149461702	149496009	ENSBTAG00000004791	VPS26C	0.199	0.302	0.509896	0.828845	0
1	149567810	149711585	ENSBTAG00000001771	DYRK1A	-0.235	0.197	0.230139	0.597314	0
1	150668926	150803833	ENSBTAG00000011001	ERG	0.015	0.114	0.894984	0.975865	1
1	151161814	151181631	ENSBTAG00000009214	ETS2	0.191	0.068	0.00511026	0.0707089	1
1	151476118	151562607	ENSBTAG00000020787	PIK3R4	-0.02	0.288	0.94499	0.985803	0
1	152232655	152284372	ENSBTAG00000006479	CAPN7	-0.104	0.254	0.68254	0.90841	1
1	152286347	152366452	ENSBTAG00000023377	SH3BP5	0.428	0.163	0.00932238	0.106629	1
1	152434570	152450925	ENSBTAG00000023375	METTL6	-0.447	0.213	0.0357288	0.242894	0
1	152450841	152463273	ENSBTAG00000019202	EAF1	-0.141	0.154	0.359667	0.732775	0
1	152599803	152638556	ENSBTAG00000003718	HACL1	-0.274	0.168	0.109599	0.430698	0
1	152638136	152679233	ENSBTAG00000019129	BTD	-0.059	0.154	0.70172	0.91406	0
1	152701411	152833098	ENSBTAG00000024815	ANKRD28	-0.129	0.155	0.405409	0.7662	0
1	153260324	153266600	ENSBTAG00000003916	DPH3	0.038	0.182	0.834448	0.95544	0
1	153274404	153318611	ENSBTAG00000004891	OXNAD1	-0.368	0.26	0.161513	0.515199	0
1	153335376	153514351	ENSBTAG00000030593		-0.125	0.157	0.426032	0.778461	0
1	153472750	153543136	ENSBTAG00000051752		0.029	0.13	0.823536	0.95256	0
1	153834039	153870059	ENSBTAG00000052583		-0.069	0.134	0.606553	0.875705	0
1	153882096	154095595	ENSBTAG00000009942	PLCL2	-0.639	0.343	0.0574331	0.316615	0
1	154096128	154616588	ENSBTAG00000030581	TBC1D5	-0.175	0.23	0.446657	0.79254	0
1	155431343	155525165	ENSBTAG00000021158	SATB1	0.236	0.198	0.230139	0.597314	0
1	157125001	157190548	ENSBTAG00000013806	EFHB	0.003	0.133	0.98165	0.994506	0
1	157198501	157232069	ENSBTAG00000046385	RAB5A	-0.203	0.267	0.447255	0.79259	0
1	157277141	157374828	ENSBTAG00000000746	KAT2B	-0.097	0.102	0.341604	0.722638	0
1	157392691	157410804	ENSBTAG00000000752	SGO1	-0.173	0.136	0.193601	0.557799	0
1	157490908	157500089	ENSBTAG00000049158	ZNF596	0.176	0.132	0.193601	0.557799	0
1	158215919	158228038	ENSBTAG00000012867	TXLNA	-0.049	0.187	0.793321	0.941792	0
1	158238278	158293060	ENSBTAG00000002896	KPNA6	-0.267	0.239	0.271332	0.633529	0
1	158271677	158272330	ENSBTAG00000049543		-0.088	0.072	0.230139	0.597314	0
1	158296611	158315972	ENSBTAG00000016954	TMEM39B	0.558	0.25	0.0278069	0.208236	0
1	158336214	158359816	ENSBTAG00000012497	KHDRBS1	0.293	0.31	0.344659	0.723362	0
1	158390488	158415855	ENSBTAG00000049541	ASMT	-0.083	0.075	0.271332	0.633529	0
2	719767	951758	ENSBTAG00000013916	HERC2	0.239	0.124	0.0574331	0.316615	0
2	1044598	1064844	ENSBTAG00000016895	NIPA2	0.773	0.277	0.00511026	0.0707089	0
2	1066691	1175326	ENSBTAG00000016894	CYFIP1	0.225	0.152	0.133614	0.472094	0
2	1232958	1284056	ENSBTAG00000014714	TUBGCP5	0.402	0.154	0.00932238	0.106629	0
2	1314158	1318235	ENSBTAG00000015841	CCDC115	0.045	0.218	0.836791	0.955723	0
2	1318420	1323393	ENSBTAG00000003225	IMP4	-0.238	0.201	0.230139	0.597314	0
2	1322993	1352673	ENSBTAG00000011658	PTPN18	-0.235	0.122	0.0574331	0.316615	0
2	1679994	1864849	ENSBTAG00000015834	ARHGEF4	-0.181	0.11	0.109599	0.430698	0
2	1865381	1906516	ENSBTAG00000034978	FAM168B	0.324	0.254	0.193601	0.557799	0
2	1920239	1969794	ENSBTAG00000000941	PLEKHB2	0.319	0.286	0.271332	0.633529	0
2	4187288	4227153	ENSBTAG00000050824	HS6ST1	-0.278	0.132	0.0357288	0.242894	0
2	4300416	4399011	ENSBTAG00000005444	UGGT1	-0.021	0.092	0.819646	0.951661	0
2	4399865	4408277	ENSBTAG00000050981		-0.03	0.059	0.611453	0.877625	0
2	4454874	4530094	ENSBTAG00000006003	SAP130	-0.081	0.235	0.730094	0.922813	0
2	4601012	4621042	ENSBTAG00000008089	AMMECR1L	-0.186	0.281	0.507971	0.828402	0
2	4623473	4636747	ENSBTAG00000053244	POLR2D	0.268	0.199	0.193601	0.557799	0
2	4676998	4785534	ENSBTAG00000005987	WDR33	-0.23	0.339	0.497772	0.823336	0
2	4790398	4791060	ENSBTAG00000005986	SFT2D3	-0.058	0.117	0.619894	0.881174	0
2	4842239	4887427	ENSBTAG00000006262	LIMS2	0.101	0.054	0.0574331	0.316615	0
2	5031102	5057954	ENSBTAG00000021172	IWS1	0.021	0.245	0.931466	0.983823	0
2	5199357	5234002	ENSBTAG00000004216	MAP3K2	0.108	0.074	0.133614	0.472094	0
2	5248748	5279066	ENSBTAG00000020777	ERCC3	-0.324	0.316	0.317311	0.70242	0
2	5418420	5475051	ENSBTAG00000019177	BIN1	-0.51	0.2	0.0124193	0.127509	0
2	5466022	5466097	ENSBTAG00000045010	bta-mir-2350	0.012	0.066	0.855583	0.963491	0
2	5634458	5683747	ENSBTAG00000000266	NAB1	0.316	0.188	0.0891309	0.393847	0
2	5786098	5810777	ENSBTAG00000015678	NEMP2	0.13	0.127	0.317311	0.70242	0
2	5820563	5881926	ENSBTAG00000007719	MFSD6	0.391	0.148	0.00932238	0.106629	0
2	5934748	5970809	ENSBTAG00000007584	INPP1	-0.588	0.192	0.00193521	0.0343136	0
2	5980697	6129150	ENSBTAG00000007787	HIBCH	0.388	0.163	0.0163951	0.152243	0
2	6460095	6592355	ENSBTAG00000018795	PMS1	-0.054	0.172	0.753521	0.929921	0
2	6572135	6584583	ENSBTAG00000012561	ORMDL1	0.132	0.192	0.491453	0.819589	0
2	6592659	6603565	ENSBTAG00000012557	OSGEPL1	0.169	0.161	0.317311	0.70242	0
2	6665574	6676526	ENSBTAG00000000492	ASNSD1	-0.086	0.232	0.710638	0.915952	0
2	6776416	6800154	ENSBTAG00000010498	SLC40A1	0.199	0.079	0.0124193	0.127509	0
2	6935086	6976756	ENSBTAG00000003002	WDR75	0.211	0.216	0.328569	0.715094	0
2	7375289	7414912	ENSBTAG00000021466	COL3A1	-0.02	0.02	0.317311	0.70242	0
2	8776893	8875333	ENSBTAG00000049919	TFPI	-0.001	0.058	0.986437	0.99581	0
2	8891734	9020442	ENSBTAG00000008483	CALCRL	0.025	0.077	0.745181	0.926745	0
2	9553295	9633357	ENSBTAG00000050392	FAM171B	0.03	0.074	0.685478	0.910098	0
2	9644368	9749556	ENSBTAG00000019929	ITGAV	0.128	0.095	0.193601	0.557799	0
2	9838366	9859389	ENSBTAG00000021762	ZC3H15	-0.297	0.212	0.161513	0.515199	0
2	13426631	13458918	ENSBTAG00000009777	NUP35	-0.335	0.203	0.0891309	0.393847	0
2	13474287	13490743	ENSBTAG00000020961	DUSP19	0.254	0.146	0.0891309	0.393847	0
2	13528238	13633956	ENSBTAG00000033662	NCKAP1	0.087	0.096	0.364936	0.736333	0
2	13693338	13730072	ENSBTAG00000010977	FRZB	-0.137	0.049	0.00511026	0.0707089	0
2	13794248	13842369	ENSBTAG00000008390	DNAJC10	0.071	0.192	0.711382	0.916253	0
2	14412323	14414971	ENSBTAG00000050322		0.033	0.097	0.733857	0.924275	0
2	14654230	14751034	ENSBTAG00000000937	ITPRID2	0.079	0.149	0.596112	0.870861	0
2	14945329	15081254	ENSBTAG00000009257	CERKL	0.086	0.103	0.403718	0.764965	0
2	15083908	15176065	ENSBTAG00000009256	ITGA4	-0.009	0.094	0.923521	0.982872	0
2	15330595	15365274	ENSBTAG00000050811		-0.054	0.094	0.565968	0.856881	0
2	15639801	15731672	ENSBTAG00000043956	UBE2E3	0.836	0.223	0.000215599	0.00630013	0
2	16813692	16875835	ENSBTAG00000021726	CWC22	-0.094	0.237	0.691367	0.911081	0
2	17618997	17764631	ENSBTAG00000001861	SESTD1	0.078	0.092	0.396438	0.758972	0
2	18388139	18415849	ENSBTAG00000001098	PLEKHA3	0.117	0.249	0.638355	0.889355	0
2	18481775	18696841	ENSBTAG00000014405	OSBPL6	0.004	0.095	0.966499	0.990114	0
2	18758172	18779396	ENSBTAG00000006168	RBM45	0.195	0.272	0.473374	0.807706	0
2	19259234	19262164	ENSBTAG00000027694	TTC30A	0.212	0.191	0.271332	0.633529	0
2	19341272	19468765	ENSBTAG00000009897	AGPS	-0.586	0.187	0.00193521	0.0343136	0
2	19617026	19649649	ENSBTAG00000019255	NFE2L2	0.16	0.157	0.317311	0.70242	0
2	19658429	19663581	ENSBTAG00000021580	HNRNPA3	0.026	0.269	0.922726	0.982872	0
2	20568451	20644147	ENSBTAG00000006693	MTX2	0.234	0.164	0.161513	0.515199	0
2	20906685	21011464	ENSBTAG00000018061	LNPK	-0.166	0.214	0.437749	0.785854	0
2	21688062	21691528	ENSBTAG00000002944	ATP5MC3	0.024	0.109	0.825871	0.953326	0
2	21736325	21792993	ENSBTAG00000002295	ATF2	-0.035	0.167	0.833668	0.95544	0
2	22130033	22259090	ENSBTAG00000001585	WIPF1	-0.007	0.234	0.976067	0.993583	0
2	22319664	22358578	ENSBTAG00000021636	GPR155	-0.157	0.137	0.271332	0.633529	0
2	22365327	22397420	ENSBTAG00000012966	SCRN3	0.077	0.098	0.431867	0.78258	0
2	22397395	22442851	ENSBTAG00000038620	CIR1	0.133	0.154	0.387588	0.752253	0
2	22528224	22693132	ENSBTAG00000006970	OLA1	-0.008	0.156	0.959326	0.988339	0
2	22797327	22853605	ENSBTAG00000000176	SP3	-0.222	0.157	0.161513	0.515199	0
2	23340522	23353696	ENSBTAG00000003458	CDCA7	-0.081	0.188	0.666468	0.901473	0
2	23405489	23558475	ENSBTAG00000001083	MAP3K20	0.141	0.129	0.271332	0.633529	0
2	24026650	24069014	ENSBTAG00000016836	PDK1	0.09	0.134	0.501584	0.824745	0
2	24091577	24179151	ENSBTAG00000017266	ITGA6	-0.196	0.118	0.0891309	0.393847	0
2	24470859	24547937	ENSBTAG00000019075	METAP1D	0.553	0.178	0.00193521	0.0343136	0
2	24564087	24604728	ENSBTAG00000010118	HAT1	0.181	0.15	0.230139	0.597314	0
2	24637412	24736032	ENSBTAG00000016762	SLC25A12	0.359	0.285	0.193601	0.557799	0
2	24765631	24819628	ENSBTAG00000002646	DYNC1I2	0.211	0.209	0.317311	0.70242	0
2	24912893	24945933	ENSBTAG00000007898	CYBRD1	0.089	0.12	0.458087	0.799024	0
2	25003233	25029169	ENSBTAG00000007683	DCAF17	0.164	0.14	0.230139	0.597314	0
2	25029282	25113419	ENSBTAG00000016430	METTL8	0.338	0.163	0.0357288	0.242894	0
2	25270780	25365912	ENSBTAG00000049842		-0.03	0.147	0.838353	0.956375	0
2	25392971	25450609	ENSBTAG00000006918	TLK1	-0.108	0.196	0.581634	0.863291	0
2	25523794	25529803	ENSBTAG00000036258		-0.135	0.09	0.133614	0.472094	0
2	25523852	25556898	ENSBTAG00000013218	GORASP2	0.526	0.251	0.0357288	0.242894	0
2	26314651	26517652	ENSBTAG00000020296	UBR3	0.029	0.126	0.818092	0.950737	0
2	26534429	26545290	ENSBTAG00000026008	METTL5	0.159	0.172	0.355486	0.730301	0
2	26545255	26554248	ENSBTAG00000008716	SSB	0.144	0.161	0.371322	0.740517	0
2	26613246	26618722	ENSBTAG00000001092	PHOSPHO2	-0.215	0.125	0.0891309	0.393847	0
2	26648100	26689515	ENSBTAG00000027789	PPIG	0.058	0.178	0.744424	0.926447	0
2	26694016	26730287	ENSBTAG00000010743	FASTKD1	-0.287	0.177	0.109599	0.430698	0
2	26753551	26774873	ENSBTAG00000010736	BBS5	-0.141	0.141	0.317311	0.70242	0
2	27067552	27092118	ENSBTAG00000004557	DHRS9	-0.008	0.095	0.933056	0.983916	0
2	27248579	27260964	ENSBTAG00000010048	SPC25	-0.029	0.143	0.839135	0.95657	0
2	27359574	27712447	ENSBTAG00000044179	CERS6	-0.567	0.076	6.38178e-14	2.66673e-11	0
2	27870256	28191872	ENSBTAG00000017162	STK39	-0.186	0.157	0.230139	0.597314	0
2	28192171	28252021	ENSBTAG00000051560		-0.161	0.085	0.0574331	0.316615	0
2	30336543	30434725	ENSBTAG00000016512	TTC21B	-0.002	0.146	0.98883	0.997102	0
2	30545764	30569913	ENSBTAG00000013957	GALNT3	-0.198	0.144	0.161513	0.515199	0
2	31096287	31096586	ENSBTAG00000050020		-0.072	0.054	0.193601	0.557799	0
2	31103231	31183473	ENSBTAG00000019385	SCN3A	-0.075	0.059	0.193601	0.557799	0
2	31290313	31348516	ENSBTAG00000007650	SLC38A11	0.015	0.053	0.777177	0.93806	0
2	31429997	31587069	ENSBTAG00000005501	COBLL1	-0.019	0.098	0.846176	0.958841	0
2	34070353	34087612	ENSBTAG00000018446	GCA	-0.008	0.073	0.912409	0.980705	0
2	34111730	34166890	ENSBTAG00000008142	IFIH1	0.001	0.143	0.994415	0.997917	0
2	34382575	34466656	ENSBTAG00000048246	DPP4	0.478	0.134	0.000318217	0.00832812	0
2	34972722	35083065	ENSBTAG00000021691	PSMD14	-0.003	0.167	0.985639	0.995486	0
2	35143374	35239417	ENSBTAG00000006654	TANK	-0.115	0.173	0.50605	0.827207	0
2	35855477	36075061	ENSBTAG00000005180	RBMS1	-0.125	0.186	0.501584	0.824745	0
2	36271243	36405254	ENSBTAG00000032515	PLA2R1	0.064	0.038	0.0891309	0.393847	0
2	36454504	36545934	ENSBTAG00000017797	LY75	0.025	0.108	0.817315	0.950186	0
2	36552660	36579199	ENSBTAG00000038195	CD302	0.211	0.159	0.193601	0.557799	0
2	36579472	36627161	ENSBTAG00000008755	MARCHF7	-0.002	0.179	0.991223	0.997189	0
2	36715262	37045806	ENSBTAG00000020654	BAZ2B	-0.085	0.078	0.271332	0.633529	0
2	37061967	37131114	ENSBTAG00000004184	WDSUB1	-0.084	0.117	0.472757	0.807423	0
2	37135008	37386059	ENSBTAG00000004177	TANC1	-0.081	0.1	0.41794	0.773671	0
2	37488235	37515045	ENSBTAG00000032481	DAPL1	0.004	0.077	0.958529	0.988086	0
2	37644721	37901601	ENSBTAG00000013773	PKP4	-0.067	0.125	0.591959	0.868538	0
2	38466454	38597910	ENSBTAG00000011909	ACVR1	0.007	0.126	0.955342	0.987725	0
2	38913867	38942113	ENSBTAG00000008329	CYTIP	-0.246	0.176	0.161513	0.515199	0
2	39653910	39803015	ENSBTAG00000009770	GPD2	0.147	0.12	0.230139	0.597314	0
2	39887966	39905341	ENSBTAG00000003650	NR4A2	-0.095	0.178	0.593342	0.869042	0
2	43268213	43269180	ENSBTAG00000012816		-0.013	0.134	0.922726	0.982872	0
2	43427948	43469180	ENSBTAG00000001435	ARL6IP6	-0.242	0.198	0.230139	0.597314	0
2	43458207	43462208	ENSBTAG00000047365		0.011	0.091	0.903691	0.978465	0
2	43470324	43528516	ENSBTAG00000048151	PRPF40A	0.115	0.147	0.434215	0.78382	0
2	43534082	43866708	ENSBTAG00000026851	FMNL2	-0.044	0.11	0.689157	0.910739	0
2	44006701	44053721	ENSBTAG00000001887	STAM2	0.036	0.152	0.812657	0.948554	0
2	44355896	44378831	ENSBTAG00000002293	ARL5A	-0.072	0.116	0.5346	0.842033	0
2	44434401	44651653	ENSBTAG00000006907	NEB	-0.096	0.087	0.271332	0.633529	0
2	44660223	44709690	ENSBTAG00000021020	RIF1	-0.034	0.087	0.695797	0.912206	0
2	44747145	44764214	ENSBTAG00000007239	TNFAIP6	-0.05	0.045	0.271332	0.633529	0
2	44826000	44846258	ENSBTAG00000032369	NMI	-0.009	0.121	0.94101	0.985588	0
2	44857602	44869106	ENSBTAG00000016217	RBM43	0.356	0.141	0.0124193	0.127509	0
2	46549089	46565933	ENSBTAG00000015962	MMADHC	0.101	0.198	0.610051	0.877625	0
2	46624526	46753941	ENSBTAG00000047426	LYPD6	0.052	0.063	0.409372	0.768706	0
2	47420198	47547292	ENSBTAG00000018581	EPC2	-0.217	0.198	0.271332	0.633529	0
2	47698242	47756040	ENSBTAG00000019592	MBD5	-0.365	0.135	0.00693395	0.0881582	0
2	47896215	47896544	ENSBTAG00000051947	PTMA	-0.067	0.101	0.507331	0.828219	0
2	48007814	48181419	ENSBTAG00000054442		-0.277	0.134	0.0357288	0.242894	0
2	48181494	48275918	ENSBTAG00000015291	ORC4	0.299	0.211	0.161513	0.515199	0
2	48279649	48374634	ENSBTAG00000018114	ACVR2A	-0.203	0.136	0.133614	0.472094	0
2	52174189	52264474	ENSBTAG00000048810	ZEB2	0.065	0.101	0.519575	0.833022	0
2	52268261	52305498	ENSBTAG00000012615	ZEB2	0.038	0.104	0.715111	0.917474	0
2	52388547	52825730	ENSBTAG00000001132	GTDC1	0.258	0.212	0.230139	0.597314	0
2	52561468	52794962	ENSBTAG00000050589		0.096	0.054	0.0718606	0.354245	0
2	52965089	53630365	ENSBTAG00000032289	ARHGAP15	-0.069	0.2	0.730094	0.922813	0
2	53739155	53888583	ENSBTAG00000032277	KYNU	0.037	0.164	0.821201	0.951968	0
2	58563828	58612726	ENSBTAG00000013455	SPOPL	0.123	0.096	0.193601	0.557799	0
2	59138783	59180569	ENSBTAG00000014432	HNMT	0.082	0.087	0.345681	0.724053	0
2	61250082	61253877	ENSBTAG00000001060	CXCR4	0.099	0.084	0.230139	0.597314	0
2	61390060	61455629	ENSBTAG00000009949	DARS1	0.189	0.193	0.32758	0.713685	0
2	61489617	61524285	ENSBTAG00000015172	MCM6	0.324	0.206	0.109599	0.430698	0
2	61588164	61617901	ENSBTAG00000015169	UBXN4	0.33	0.235	0.161513	0.515199	0
2	61636892	61799766	ENSBTAG00000013302	R3HDM1	-0.529	0.207	0.00932238	0.106629	0
2	61831040	62103607	ENSBTAG00000026842	ZRANB3	-0.3	0.191	0.109599	0.430698	0
2	62127818	62238789	ENSBTAG00000013449	RAB3GAP1	-0.004	0.35	0.991223	0.997189	0
2	62319905	62352405	ENSBTAG00000014158	CCNT2	0.011	0.133	0.933852	0.984258	0
2	62513122	62781938	ENSBTAG00000018753	TMEM163	-0.163	0.151	0.271332	0.633529	0
2	62784836	63181459	ENSBTAG00000018744	MGAT5	-0.153	0.094	0.109599	0.430698	0
2	65335291	65377141	ENSBTAG00000021103	SLC35F5	0.226	0.129	0.0718606	0.354245	0
2	65522494	65569993	ENSBTAG00000003401	ACTR3	0.17	0.232	0.463558	0.802426	0
2	69496365	69511380	ENSBTAG00000015077		0.094	0.193	0.626258	0.8833	0
2	69565219	69664403	ENSBTAG00000010221	CCDC93	-0.772	0.268	0.00373163	0.0560907	0
2	69756864	69786933	ENSBTAG00000002112	INSIG2	0.04	0.17	0.814209	0.94904	0
2	71009555	71061343	ENSBTAG00000007111	STEAP3	0.157	0.123	0.193601	0.557799	0
2	71107880	71192356	ENSBTAG00000010599	C2H2orf76	-0.154	0.107	0.161513	0.515199	0
2	71192388	71197568	ENSBTAG00000009517	DBI	0.111	0.12	0.354966	0.730301	0
2	71480988	71482235	ENSBTAG00000009058	TMEM177	0.244	0.096	0.0124193	0.127509	0
2	71546908	71733059	ENSBTAG00000020855	PTPN4	0.065	0.078	0.404845	0.766058	0
2	71939113	71941225	ENSBTAG00000026829	TMEM185B	-0.491	0.236	0.0357288	0.242894	0
2	71941425	72016188	ENSBTAG00000032021	RALB	-0.353	0.157	0.0278069	0.208236	0
2	73071996	73306346	ENSBTAG00000019781	CLASP1	0.065	0.148	0.660662	0.89827	0
2	73387424	73397873	ENSBTAG00000019387	NIFK	-0.366	0.177	0.0357288	0.242894	0
2	73398067	73416298	ENSBTAG00000006059	TSN	-0.416	0.316	0.193601	0.557799	0
2	78885394	78934052	ENSBTAG00000014863	GYPC	-0.116	0.113	0.317311	0.70242	0
2	79427772	79481911	ENSBTAG00000007863	GLS	-0.155	0.114	0.161513	0.515199	0
2	79465117	79512607	ENSBTAG00000051479		-0.134	0.12	0.271332	0.633529	0
2	79518741	79560102	ENSBTAG00000007867	STAT1	0.125	0.151	0.40767	0.767697	0
2	79568840	79673336	ENSBTAG00000046699	STAT4	0.172	0.177	0.331051	0.717133	0
2	80266321	80275110	ENSBTAG00000018653	NABP1	0.179	0.187	0.338567	0.721325	0
2	80270240	80270403	ENSBTAG00000051167		-0.027	0.062	0.663562	0.89997	0
2	84018938	84020154	ENSBTAG00000009976		0.098	0.128	0.443676	0.789934	0
2	84253392	84389538	ENSBTAG00000016782	SLC39A10	0.184	0.135	0.161513	0.515199	0
2	84377037	84632137	ENSBTAG00000016784	DNAH7	0.04	0.083	0.629806	0.885515	0
2	84682093	84723198	ENSBTAG00000013196	STK17B	0.254	0.122	0.0357288	0.242894	0
2	84741175	85088822	ENSBTAG00000020696	HECW2	0.075	0.075	0.317311	0.70242	0
2	85236757	85328185	ENSBTAG00000017695	CCDC150	0.835	0.139	1.97318e-09	2.52405e-07	0
2	85361038	85393083	ENSBTAG00000007779	GTF3C3	0.253	0.199	0.193601	0.557799	0
2	85567851	85752864	ENSBTAG00000031696	ANKRD44	0.172	0.105	0.109599	0.430698	0
2	85946152	85984071	ENSBTAG00000008915	SF3B1	0.114	0.161	0.478945	0.810592	0
2	86007358	86024344	ENSBTAG00000004659	COQ10B	0.296	0.208	0.161513	0.515199	0
2	86035475	86045870	ENSBTAG00000012586	HSPD1	0.002	0.2	0.992021	0.997274	0
2	86044912	86048062	ENSBTAG00000012589	HSPE1	0.052	0.13	0.689157	0.910739	0
2	86060754	86090534	ENSBTAG00000019116	MOB4	-0.1	0.18	0.578211	0.861885	0
2	86189671	86191905	ENSBTAG00000002056	MARS2	0.128	0.235	0.585754	0.865104	0
2	86319697	86686609	ENSBTAG00000007635	PLCL1	0.105	0.101	0.317311	0.70242	0
2	88480800	88492586	ENSBTAG00000009952	C2H2orf69	0.153	0.14	0.271332	0.633529	0
2	88496394	88519396	ENSBTAG00000019232	TYW5	0.264	0.164	0.109599	0.430698	0
2	88519695	88531251	ENSBTAG00000019231	MAIP1	0.187	0.227	0.40994	0.768966	0
2	88832854	89024878	ENSBTAG00000016092	SPATS2L	-0.599	0.143	2.66915e-05	0.00112661	0
2	89035588	89056404	ENSBTAG00000002272	KCTD18	0.889	0.206	1.70798e-05	0.000770189	0
2	89070545	89099327	ENSBTAG00000031579	SGO2	0.111	0.12	0.354966	0.730301	0
2	89102213	89173911	ENSBTAG00000009725	AOX1	-0.133	0.02	2.0842e-11	4.66562e-09	0
2	89470523	89485958	ENSBTAG00000006049	BZW1	0.09	0.199	0.651269	0.896094	0
2	89504933	89512321	ENSBTAG00000005408	CLK1	-0.035	0.118	0.766467	0.934581	0
2	89519710	89530269	ENSBTAG00000005416	PPIL3	-0.074	0.191	0.698756	0.913506	0
2	89532883	89547944	ENSBTAG00000018282	NIF3L1	0.144	0.242	0.551843	0.850493	0
2	89551970	89589796	ENSBTAG00000031473	ORC2	0.203	0.214	0.342621	0.722795	0
2	89605073	89661226	ENSBTAG00000021201	FAM126B	0.071	0.092	0.440114	0.787282	0
2	89662427	89672935	ENSBTAG00000012760	NDUFB3	-0.026	0.121	0.829767	0.954309	0
2	89703845	89757452	ENSBTAG00000010998	CFLAR	0.027	0.18	0.880765	0.971872	0
2	89861141	89885545	ENSBTAG00000015718	CASP8	0.343	0.237	0.161513	0.515199	0
2	89938529	90008545	ENSBTAG00000014933	TRAK2	-0.01	0.117	0.932261	0.983823	0
2	90008658	90040182	ENSBTAG00000019298	STRADB	-0.179	0.146	0.230139	0.597314	0
2	90171834	90195668	ENSBTAG00000017437	TMEM237	-0.009	0.146	0.950563	0.987127	0
2	90248645	90296359	ENSBTAG00000007395	ALS2	-0.093	0.136	0.493975	0.821719	0
2	90571270	90573476	ENSBTAG00000002283	FZD7	0.105	0.085	0.230139	0.597314	0
2	90739349	90765594	ENSBTAG00000049402	SUMO1	-0.027	0.154	0.86108	0.964846	0
2	90787057	90810889	ENSBTAG00000005517	NOP58	0.082	0.188	0.662837	0.899569	0
2	90864689	91017391	ENSBTAG00000006420	BMPR2	-0.013	0.079	0.868944	0.96707	0
2	91060088	91131852	ENSBTAG00000048876	FAM117B	0.079	0.131	0.546509	0.84853	0
2	91206414	91230173	ENSBTAG00000015424	WDR12	0.088	0.182	0.628386	0.884609	0
2	91242784	91310808	ENSBTAG00000016000	CARF	0.106	0.117	0.364936	0.736333	0
2	91270021	91271660	ENSBTAG00000019994		-0.024	0.091	0.79178	0.941187	0
2	91317091	91471377	ENSBTAG00000014469	NBEAL1	0.006	0.063	0.924315	0.982883	0
2	91483594	91527751	ENSBTAG00000000851	CYP20A1	-0.283	0.18	0.109599	0.430698	0
2	91544953	91642576	ENSBTAG00000011017	ABI2	-0.119	0.129	0.356529	0.730301	0
2	91652748	91750016	ENSBTAG00000027201	RAPH1	0.142	0.065	0.0278069	0.208236	0
2	91906146	91939649	ENSBTAG00000007445	CD28	0.107	0.173	0.536575	0.842815	0
2	92070614	92077168	ENSBTAG00000013170	CTLA4	0.085	0.126	0.499676	0.823949	0
2	92144569	92169924	ENSBTAG00000021596	ICOS	0.097	0.164	0.55452	0.851061	0
2	92575447	92576061	ENSBTAG00000040367		-0.035	0.045	0.436569	0.784635	0
2	93255171	93626123	ENSBTAG00000010293	PARD3B	0.118	0.053	0.0278069	0.208236	0
2	93887713	93957400	ENSBTAG00000053833		0.068	0.057	0.230139	0.597314	0
2	94028625	94145404	ENSBTAG00000011971	NRP2	-0.037	0.069	0.591959	0.868538	0
2	94363694	94404651	ENSBTAG00000014407	INO80D	0.017	0.062	0.784085	0.939433	0
2	94422133	94424305	ENSBTAG00000054879		-0.077	0.171	0.65271	0.896315	0
2	94460487	94489927	ENSBTAG00000021976	NDUFS1	0.028	0.256	0.913202	0.980969	0
2	94490094	94493400	ENSBTAG00000021979	EEF1B2	0.019	0.124	0.878398	0.971212	0
2	95064720	95085010	ENSBTAG00000016193	FASTKD2	1	0.169	3.63502e-09	4.21931e-07	0
2	95370241	95469238	ENSBTAG00000044097	KLF7	0.029	0.099	0.769522	0.935667	0
2	95846071	95897815	ENSBTAG00000005474	CREB1	0.004	0.125	0.974472	0.993008	0
2	95910212	95920426	ENSBTAG00000052083	METTL21A	-0.066	0.213	0.756561	0.931381	0
2	95992566	96027482	ENSBTAG00000016297	CCNYL1	0.082	0.13	0.528041	0.838444	0
2	96039164	96040921	ENSBTAG00000020957	FZD5	0.057	0.078	0.464779	0.802434	0
2	96101252	96318495	ENSBTAG00000007830	PLEKHM3	0.052	0.078	0.504772	0.825763	0
2	96510261	96532002	ENSBTAG00000020527	IDH1	-0.085	0.119	0.475227	0.809106	0
2	96551552	96557130	ENSBTAG00000055312		0.004	0.1	0.968093	0.990695	0
2	96557844	96625577	ENSBTAG00000002177	PIKFYVE	-0.097	0.094	0.317311	0.70242	0
2	97414229	97562142	ENSBTAG00000018130	MAP2	-0.034	0.081	0.674485	0.904606	0
2	97826470	97847706	ENSBTAG00000054647	RPE	-0.038	0.202	0.850877	0.961734	0
2	97848310	97972682	ENSBTAG00000021600	KANSL1L	0.123	0.122	0.317311	0.70242	0
2	98188212	98237653	ENSBTAG00000015066	LANCL1	0.025	0.144	0.861865	0.964846	0
2	100983983	101012178	ENSBTAG00000048438		-0.034	0.074	0.646234	0.893678	0
2	101012199	101190609	ENSBTAG00000037804	IKZF2	0.136	0.09	0.133614	0.472094	0
2	102760020	102854286	ENSBTAG00000033690	BARD1	0.473	0.148	0.00137428	0.0266686	0
2	103327789	103350913	ENSBTAG00000019274	ATIC	-0.997	0.179	2.14352e-08	2.05123e-06	0
2	103361566	103431472	ENSBTAG00000008300	FN1	0.077	0.068	0.271332	0.633529	0
2	103970393	104038722	ENSBTAG00000013215	MREG	-0.073	0.144	0.612155	0.878129	0
2	104068554	104116082	ENSBTAG00000006821	PECR	-0.244	0.157	0.109599	0.430698	0
2	104134456	104223320	ENSBTAG00000010426	XRCC5	-0.151	0.195	0.438931	0.786849	0
2	104423001	104474279	ENSBTAG00000003843	SMARCAL1	0.788	0.315	0.0124193	0.127509	0
2	104486567	104489680	ENSBTAG00000051254	RPL37A	0.037	0.093	0.69063	0.911081	0
2	105902088	106118422	ENSBTAG00000002485	TNS1	0.078	0.042	0.0574331	0.316615	0
2	106154128	106175952	ENSBTAG00000003327	RUFY4	0.088	0.035	0.0124193	0.127509	0
2	106185020	106192570	ENSBTAG00000038042	CXCR2	0.047	0.037	0.193601	0.557799	0
2	106215131	106219158	ENSBTAG00000026753	CXCR1	0.013	0.029	0.654153	0.896618	0
2	106256621	106284396	ENSBTAG00000010386	ARPC2	0.156	0.204	0.444272	0.790657	0
2	106290033	106293245	ENSBTAG00000003923	GPBAR1	0.088	0.079	0.271332	0.633529	0
2	106293589	106298509	ENSBTAG00000003927	AAMP	-0.05	0.175	0.774878	0.937723	0
2	106298904	106301390	ENSBTAG00000051631	PNKD	-0.133	0.115	0.230139	0.597314	0
2	106302074	106319619	ENSBTAG00000003935	TMBIM1	0.162	0.109	0.133614	0.472094	0
2	106348916	106371789	ENSBTAG00000003936	PNKD	-0.113	0.136	0.405974	0.767036	0
2	106392590	106403650	ENSBTAG00000015520	SLC11A1	0.062	0.092	0.500311	0.823949	0
2	106408440	106413567	ENSBTAG00000008362	CTDSP1	-0.396	0.19	0.0357288	0.242894	0
2	106447346	106532901	ENSBTAG00000016572	USP37	0.111	0.149	0.456272	0.798078	0
2	106532969	106566527	ENSBTAG00000003807	CNOT9	-0.993	0.412	0.0163951	0.152243	0
2	106575924	106598631	ENSBTAG00000003809	PLCD4	-0.119	0.092	0.193601	0.557799	0
2	106598789	106618772	ENSBTAG00000026772	ZNF142	0.014	0.155	0.928287	0.983105	0
2	106619142	106623100	ENSBTAG00000003813	BCS1L	-0.103	0.148	0.486429	0.815987	0
2	106623552	106632884	ENSBTAG00000003817	RNF25	-0.223	0.205	0.271332	0.633529	0
2	106633221	106659569	ENSBTAG00000003819	STK36	-0.071	0.156	0.649109	0.89489	0
2	106656154	106706020	ENSBTAG00000018415	TTLL4	0.323	0.202	0.109599	0.430698	0
2	106739389	106782307	ENSBTAG00000013489	CYP27A1	-0.059	0.088	0.502858	0.825324	0
2	107020701	107112857	ENSBTAG00000031041	NHEJ1	0.097	0.163	0.551843	0.850493	0
2	107122933	107126587	ENSBTAG00000012619	CNPPD1	0.211	0.196	0.271332	0.633529	0
2	107128001	107133526	ENSBTAG00000012620	RETREG2	0.106	0.213	0.618484	0.880959	0
2	107158435	107162015	ENSBTAG00000020606	ZFAND2B	-0.21	0.218	0.335548	0.719539	0
2	107162129	107169762	ENSBTAG00000020607	ABCB6	-0.212	0.182	0.230139	0.597314	0
2	107170269	107179679	ENSBTAG00000020608	ATG9A	0.173	0.2	0.387039	0.752253	0
2	107179983	107186463	ENSBTAG00000020610	ANKZF1	-0.436	0.288	0.133614	0.472094	0
2	107186405	107194793	ENSBTAG00000020611	GLB1L	0.114	0.12	0.342112	0.722795	0
2	107194871	107198250	ENSBTAG00000020613	STK16	-0.009	0.173	0.958529	0.988086	0
2	107196605	107203963	ENSBTAG00000030974	TUBA4A	-0.168	0.082	0.0455003	0.279604	0
2	107214372	107220493	ENSBTAG00000030973	TUBA1D	-0.053	0.075	0.479566	0.810877	0
2	107227555	107234943	ENSBTAG00000013782	DNAJB2	-0.121	0.217	0.576844	0.861487	0
2	107259185	107259703	ENSBTAG00000013799		-0.02	0.054	0.711382	0.916253	0
2	107307884	107321008	ENSBTAG00000021514	DNPEP	0.029	0.131	0.825092	0.953217	0
2	107365755	107423369	ENSBTAG00000046176	SPEG	-0.095	0.102	0.351854	0.727261	0
2	107429346	107436451	ENSBTAG00000002995	GMPPA	-0.059	0.205	0.773347	0.937136	0
2	107462147	107472033	ENSBTAG00000020539	CHPF	0.092	0.132	0.485803	0.81581	0
2	107472513	107478573	ENSBTAG00000020540	TMEM198	0.045	0.061	0.460514	0.800251	0
2	107478709	107500811	ENSBTAG00000040338	OBSL1	-0.013	0.096	0.892612	0.975753	0
2	107521189	107535476	ENSBTAG00000038992	STK11IP	0.252	0.193	0.193601	0.557799	0
2	110589561	110734612	ENSBTAG00000046649	SGPP2	0.148	0.075	0.0455003	0.279604	0
2	110746220	110820175	ENSBTAG00000011649	FARSB	-0.01	0.152	0.947378	0.986579	0
2	111037664	111113602	ENSBTAG00000017258	ACSL3	-0.787	0.204	9.61927e-05	0.00331283	0
2	111044032	111044777	ENSBTAG00000005315		0.037	0.089	0.67741	0.906008	0
2	111893314	111893823	ENSBTAG00000027962		0.037	0.071	0.602367	0.874394	0
2	111898333	111965169	ENSBTAG00000011133	AP1S3	-0.195	0.166	0.230139	0.597314	0
2	112010456	112064142	ENSBTAG00000016951	WDFY1	0.006	0.251	0.980853	0.994015	0
2	112068965	112076912	ENSBTAG00000011514	MRPL44	0.241	0.165	0.133614	0.472094	0
2	112087760	112158159	ENSBTAG00000008717	SERPINE2	0.05	0.132	0.704688	0.915058	0
2	112586826	112699754	ENSBTAG00000021769	CUL3	-0.094	0.267	0.724838	0.920719	0
2	112861987	113100311	ENSBTAG00000000581	DOCK10	-0.116	0.177	0.512468	0.829477	0
2	115024497	115208409	ENSBTAG00000023963	RHBDD1	-0.349	0.3	0.230139	0.597314	0
2	115318013	115478018	ENSBTAG00000021316	COL4A3	-0.137	0.059	0.0214482	0.177124	0
2	115486532	115514827	ENSBTAG00000021319	MFF	-0.019	0.197	0.923521	0.982872	0
2	115629949	115704725	ENSBTAG00000021323	AGFG1	0.087	0.277	0.753521	0.929921	0
2	115838391	115840022	ENSBTAG00000007127		-0.01	0.176	0.954545	0.987725	0
2	117023746	117290403	ENSBTAG00000037640	PID1	0.09	0.036	0.0124193	0.127509	0
2	117379818	117771065	ENSBTAG00000016063	DNER	0.106	0.021	5.73303e-07	3.78259e-05	0
2	117785379	117787180	ENSBTAG00000039046	CD24	0.104	0.046	0.0214482	0.177124	0
2	117811397	117918447	ENSBTAG00000021653	TRIP12	0.25	0.174	0.161513	0.515199	0
2	118076301	118099221	ENSBTAG00000010344	SLC16A14	0.291	0.097	0.0026998	0.0440685	0
2	118153657	118162736	ENSBTAG00000007280		0.335	0.091	0.000215599	0.00630013	0
2	118178703	118179368	ENSBTAG00000005584		-0.076	0.157	0.628386	0.884609	0
2	118183281	118232898	ENSBTAG00000015752	SP110	0.442	0.204	0.0278069	0.208236	0
2	118237531	118282557	ENSBTAG00000009664		-0.101	0.277	0.715111	0.917474	0
2	118296117	118296215	ENSBTAG00000044419	5S_rRNA	0.178	0.087	0.0455003	0.279604	0
2	118309402	118313769	ENSBTAG00000047133		-0.323	0.183	0.0718606	0.354245	0
2	118332557	118337153	ENSBTAG00000054636		-0.055	0.163	0.736117	0.924275	0
2	118362310	118396685	ENSBTAG00000037702	SP140L	-0.186	0.15	0.230139	0.597314	0
2	118530388	118632791	ENSBTAG00000040055	CAB39	0.17	0.215	0.428944	0.780668	0
2	118666034	118680136	ENSBTAG00000017855	ITM2C	-0.119	0.138	0.388688	0.752523	0
2	118714413	118715459	ENSBTAG00000017431	GPR55	0.046	0.109	0.673025	0.903807	0
2	118718360	118729280	ENSBTAG00000053516		-0.03	0.113	0.791009	0.941074	0
2	118865174	118946608	ENSBTAG00000005119	PSMD1	0.087	0.316	0.783316	0.938781	0
2	118967305	119146003	ENSBTAG00000018502	ARMC9	0.015	0.122	0.902107	0.97751	0
2	119174753	119179729	ENSBTAG00000001359	B3GNT7	-0.055	0.11	0.617075	0.879151	0
2	119226977	119236929	ENSBTAG00000016174	NCL	-0.414	0.23	0.0718606	0.354245	0
2	119287463	119291748	ENSBTAG00000017684	NMUR1	-0.412	0.096	1.70798e-05	0.000770189	0
2	119361737	119365630	ENSBTAG00000054422		-0.042	0.138	0.761128	0.932516	0
2	119414107	119419022	ENSBTAG00000002549		-0.516	0.184	0.00511026	0.0707089	0
2	119442706	119498775	ENSBTAG00000019480	PDE6D	-0.393	0.252	0.109599	0.430698	0
2	119504023	119527187	ENSBTAG00000005207	COPS7B	0.189	0.325	0.560567	0.854275	0
2	119630438	119987217	ENSBTAG00000011964	DIS3L2	0.017	0.287	0.952952	0.987127	0
2	120166846	120174104	ENSBTAG00000011390	CHRND	-0.016	0.056	0.774878	0.937723	0
2	120187397	120218347	ENSBTAG00000010598	EIF4E2	-0.717	0.388	0.0718606	0.354245	0
2	120344483	120393885	ENSBTAG00000004603	PHC2	-0.093	0.238	0.695797	0.912206	0
2	120410028	120436409	ENSBTAG00000012629	ZNF362	0.031	0.21	0.882343	0.972229	0
2	120514777	120551870	ENSBTAG00000020671	TRIM62	0.043	0.25	0.863438	0.965589	0
2	120653448	120677193	ENSBTAG00000017605	AK2	0.216	0.231	0.349788	0.725864	0
2	120719524	120743308	ENSBTAG00000008330	RNF19B	-0.177	0.244	0.468452	0.804564	0
2	120779969	120788339	ENSBTAG00000008336	HPCA	-0.209	0.113	0.0718606	0.354245	0
2	120815271	120849384	ENSBTAG00000018067	S100PBP	-0.001	0.24	0.996808	0.999359	0
2	120849154	120881261	ENSBTAG00000018065	YARS1	0.057	0.227	0.801814	0.944806	0
2	120883700	120910058	ENSBTAG00000018062	KIAA1522	0.138	0.097	0.161513	0.515199	0
2	120951772	120969740	ENSBTAG00000026684	SYNC	0.117	0.112	0.317311	0.70242	0
2	120969745	120986234	ENSBTAG00000005904	RBBP4	0.041	0.285	0.8855	0.973484	0
2	120987011	120998937	ENSBTAG00000027159	ZBTB8OS	-0.207	0.292	0.478324	0.810308	0
2	121176081	121199884	ENSBTAG00000020655	BSDC1	0.113	0.42	0.78793	0.940355	0
2	121223027	121225422	ENSBTAG00000046862	MARCKSL1	-0.114	0.089	0.193601	0.557799	0
2	121225584	121257548	ENSBTAG00000012698	HDAC1	0.041	0.309	0.894193	0.975865	0
2	121262594	121283528	ENSBTAG00000012695	LCK	-0.055	0.164	0.737625	0.924317	0
2	121285361	121286953	ENSBTAG00000002027	FAM167B	-0.147	0.065	0.0214482	0.177124	0
2	121291040	121298203	ENSBTAG00000014390	MTMR9	-0.059	0.16	0.712128	0.91629	0
2	121298262	121306107	ENSBTAG00000014388	EIF3I	0.082	0.193	0.670837	0.902803	0
2	121306084	121311470	ENSBTAG00000009163	TMEM234	-0.03	0.198	0.879187	0.971399	0
2	121316668	121320573	ENSBTAG00000015103	IQCC	0.012	0.204	0.952952	0.987127	0
2	121319922	121324082	ENSBTAG00000015104	CCDC28B	-0.152	0.12	0.193601	0.557799	0
2	121402133	121416389	ENSBTAG00000019486	CLDN12	0.015	0.093	0.872093	0.968443	0
2	121569848	121575674	ENSBTAG00000051364		-0.094	0.046	0.0455003	0.279604	0
2	121575106	121575160	ENSBTAG00000054661	bta-mir-2887-2	-0.072	0.04	0.0718606	0.354245	0
2	121807999	121817752	ENSBTAG00000039121	PTP4A2	0.035	0.226	0.876821	0.970667	0
2	121953227	121990032	ENSBTAG00000010657	ADGRB2	-0.045	0.045	0.317311	0.70242	0
2	122077521	122095612	ENSBTAG00000010378	PEF1	-0.152	0.144	0.271332	0.633529	0
2	122142699	122178659	ENSBTAG00000013235	TINAGL1	-0.044	0.035	0.193601	0.557799	0
2	122233162	122259028	ENSBTAG00000035081	SERINC2	-0.062	0.082	0.449649	0.794475	0
2	122285620	122294666	ENSBTAG00000016819	FABP3	-0.129	0.116	0.271332	0.633529	0
2	122295337	122347439	ENSBTAG00000016818	ZCCHC17	0.104	0.199	0.600974	0.873384	0
2	122347180	122372981	ENSBTAG00000016817	SNRNP40	-0.084	0.227	0.711382	0.916253	0
2	122527753	122653986	ENSBTAG00000018979	PUM1	0.055	0.209	0.792551	0.941478	0
2	122666044	122705716	ENSBTAG00000026676	SDC3	-0.082	0.085	0.334545	0.719201	0
2	122807359	122833480	ENSBTAG00000005477	LAPTM5	-0.336	0.224	0.133614	0.472094	0
2	124332402	124368606	ENSBTAG00000017253	MECR	-0.349	0.139	0.0124193	0.127509	0
2	124374950	124400699	ENSBTAG00000013309	SRSF4	0.045	0.293	0.87761	0.971025	0
2	124381446	124381619	ENSBTAG00000051464		0.059	0.052	0.271332	0.633529	0
2	124425343	124429820	ENSBTAG00000047524	TMEM200B	0.09	0.169	0.594034	0.869446	0
2	124431682	124610867	ENSBTAG00000006667	EPB41	0.202	0.167	0.230139	0.597314	0
2	124710421	124740398	ENSBTAG00000015771	YTHDF2	0.068	0.411	0.868944	0.96707	0
2	124758268	124785888	ENSBTAG00000001160	GMEB1	0.385	0.35	0.271332	0.633529	0
2	124810107	124834049	ENSBTAG00000026660	TAF12	-0.171	0.172	0.320223	0.707243	0
2	124850784	124854007	ENSBTAG00000048228		0.056	0.152	0.712873	0.91629	0
2	124855242	124878660	ENSBTAG00000010393	TRNAU1AP	0.08	0.254	0.752762	0.929921	0
2	124883384	124903231	ENSBTAG00000003788	RCC1	0.097	0.279	0.72784	0.922289	0
2	124922940	125007155	ENSBTAG00000002727	PHACTR4	0.113	0.202	0.576162	0.860878	0
2	125045161	125045487	ENSBTAG00000040210		-0.051	0.041	0.230139	0.597314	0
2	125068641	125074216	ENSBTAG00000002678	MED18	0.038	0.177	0.829767	0.954309	0
2	125113996	125132377	ENSBTAG00000002363	SESN2	0.074	0.166	0.655597	0.897223	0
2	125145420	125147786	ENSBTAG00000006342	ATP5IF1	-0.01	0.074	0.892612	0.975753	0
2	125150751	125171158	ENSBTAG00000018385	DNAJC8	0.101	0.196	0.606553	0.875705	0
2	125184421	125184885	ENSBTAG00000054543		0.053	0.077	0.491453	0.819589	0
2	125201951	125229055	ENSBTAG00000027051	PTAFR	-0.049	0.091	0.590577	0.867832	0
2	125249517	125390286	ENSBTAG00000043989	EYA3	-0.112	0.241	0.641931	0.891662	0
2	125392642	125400258	ENSBTAG00000008800	XKR8	0.038	0.147	0.795635	0.942552	0
2	125401099	125432986	ENSBTAG00000012997	SMPDL3B	-0.019	0.046	0.679607	0.90701	0
2	125448288	125470852	ENSBTAG00000006225	RPA2	0.114	0.199	0.566645	0.856974	0
2	125473679	125486124	ENSBTAG00000006223	THEMIS2	-0.026	0.157	0.868157	0.966795	0
2	125526927	125545896	ENSBTAG00000003866	PPP1R8	0.225	0.258	0.383208	0.751105	0
2	125550304	125585869	ENSBTAG00000001192	STX12	-0.292	0.243	0.230139	0.597314	0
2	125604197	125635148	ENSBTAG00000019614	FAM76A	0.134	0.18	0.456876	0.798133	0
2	125662055	125665793	ENSBTAG00000007554	IFI6	-0.215	0.071	0.0026998	0.0440685	0
2	125688547	125709381	ENSBTAG00000011784	FGR	-0.065	0.155	0.675216	0.904908	0
2	125759503	125780816	ENSBTAG00000037456	AHDC1	-0.217	0.094	0.0214482	0.177124	0
2	125814828	125890887	ENSBTAG00000018374	WASF2	-0.243	0.174	0.161513	0.515199	0
2	125921162	125934238	ENSBTAG00000010254	MAP3K6	-0.092	0.091	0.317311	0.70242	0
2	125934205	125940846	ENSBTAG00000010253	SYTL1	-0.12	0.139	0.388137	0.752523	0
2	125946146	125956940	ENSBTAG00000010249	TMEM222	-0.095	0.19	0.617075	0.879151	0
2	125970802	126036698	ENSBTAG00000053588	WDTC1	-0.275	0.181	0.133614	0.472094	0
2	126090279	126142300	ENSBTAG00000008766	SLC9A1	-0.52	0.163	0.00137428	0.0266686	0
2	126142527	126143534	ENSBTAG00000051649		-0.1	0.078	0.193601	0.557799	0
2	126273255	126286771	ENSBTAG00000004416	NUDC	0.167	0.149	0.271332	0.633529	0
2	126314664	126321490	ENSBTAG00000014849	GPATCH3	0.099	0.197	0.614964	0.879151	0
2	126320997	126333342	ENSBTAG00000014850	GPN2	-0.223	0.359	0.5346	0.842033	0
2	126340193	126341536	ENSBTAG00000009223	SFN	0.055	0.039	0.161513	0.515199	0
2	126349905	126374294	ENSBTAG00000046672	ZDHHC18	-0.159	0.135	0.230139	0.597314	0
2	126392028	126402241	ENSBTAG00000009796	PIGV	0.918	0.151	1.06068e-09	1.47742e-07	0
2	126408497	126477461	ENSBTAG00000001024	ARID1A	-0.261	0.122	0.0357288	0.242894	0
2	126574904	126612862	ENSBTAG00000014447	RPS6KA1	-0.139	0.233	0.550507	0.850001	0
2	126666827	126704429	ENSBTAG00000003235	DHDDS	-0.196	0.358	0.584379	0.864602	0
2	126764040	126771731	ENSBTAG00000009631	ZNF683	-0.031	0.087	0.721841	0.920455	0
2	126775472	126806913	ENSBTAG00000005629	CRYBG2	-0.04	0.122	0.742912	0.925575	0
2	126814237	126836894	ENSBTAG00000009581	UBXN11	-0.317	0.114	0.00511026	0.0707089	0
2	126837552	126839005	ENSBTAG00000009580	SH3BGRL3	0.148	0.116	0.193601	0.557799	0
2	126841741	126876537	ENSBTAG00000009579	CEP85	0.335	0.201	0.0891309	0.393847	0
2	126929533	126930613	ENSBTAG00000009562	ZNF593	0.035	0.094	0.709893	0.915952	0
2	126966876	126975053	ENSBTAG00000001513	PDIK1L	0.1	0.148	0.499041	0.823913	0
2	127052889	127070881	ENSBTAG00000006349	EXTL1	0.166	0.041	6.33425e-05	0.00236328	1
2	127089778	127125126	ENSBTAG00000005105	PAFAH2	0.111	0.253	0.660662	0.89827	1
2	127152813	127183806	ENSBTAG00000013761	STMN1	0.041	0.125	0.742912	0.925575	0
2	127225459	127237892	ENSBTAG00000021786	AUNIP	-0.028	0.157	0.858723	0.96391	0
2	127238786	127253787	ENSBTAG00000021781	MTFR1L	0.228	0.361	0.527387	0.838043	0
2	127256063	127272993	ENSBTAG00000021778	SELENON	-0.074	0.1	0.4593	0.799803	0
2	127292652	127444339	ENSBTAG00000003069	MAN1C1	-0.091	0.15	0.543851	0.847447	0
2	127482749	127508799	ENSBTAG00000001050	LDLRAP1	0.324	0.171	0.0574331	0.316615	0
2	127542968	127609384	ENSBTAG00000002988	MACO1	0.357	0.252	0.161513	0.515199	0
2	127661915	127677708	ENSBTAG00000001296	TMEM50A	0.13	0.144	0.366526	0.737641	0
2	127708588	127712696	ENSBTAG00000015222	RSRP1	-0.067	0.141	0.634787	0.887442	0
2	127725940	127731258	ENSBTAG00000001651	SYF2	0.356	0.169	0.0357288	0.242894	1
2	127998304	128061752	ENSBTAG00000050474	RUNX3	0.052	0.16	0.745181	0.926745	0
2	128114762	128188876	ENSBTAG00000009470	CLIC4	0.019	0.134	0.88708	0.973939	0
2	128245546	128251636	ENSBTAG00000054645		0.102	0.113	0.366526	0.737641	0
2	128253260	128282672	ENSBTAG00000013772	SRRM1	0.045	0.233	0.846959	0.959382	0
2	128320578	128334929	ENSBTAG00000012604	NCMAP	-0.302	0.109	0.00511026	0.0707089	0
2	128388785	128422500	ENSBTAG00000017452	RCAN3	0.01	0.166	0.952156	0.987127	0
2	128445501	128496459	ENSBTAG00000013048	NIPAL3	-0.252	0.164	0.133614	0.472094	1
2	128563987	128600189	ENSBTAG00000019791	GRHL3	-0.343	0.14	0.0124193	0.127509	0
2	128718562	128742668	ENSBTAG00000001101	IFNLR1	-0.154	0.107	0.161513	0.515199	0
2	128924106	128936367	ENSBTAG00000008072	SRSF10	-0.089	0.199	0.654875	0.896725	0
2	128938566	128942609	ENSBTAG00000030435	PNRC2	0.144	0.23	0.531315	0.840745	0
2	129001537	129038262	ENSBTAG00000019371	CNR2	-0.024	0.159	0.879976	0.971585	0
2	129056428	129079502	ENSBTAG00000030434	FUCA1	0.392	0.157	0.0124193	0.127509	0
2	129091481	129110145	ENSBTAG00000021832	HMGCL	0.261	0.218	0.230139	0.597314	0
2	129111017	129115576	ENSBTAG00000005002	GALE	-0.202	0.176	0.271332	0.633529	0
2	129115781	129121108	ENSBTAG00000011625	LYPLA2	-0.033	0.17	0.846176	0.958841	0
2	129122974	129130667	ENSBTAG00000021620	PITHD1	-0.038	0.209	0.855583	0.963491	0
2	129146487	129146577	ENSBTAG00000049982	bta-mir-10181	-0.154	0.165	0.35082	0.726562	0
2	129147034	129156032	ENSBTAG00000026585	ELOA	-0.038	0.151	0.801041	0.944806	0
2	129168191	129198058	ENSBTAG00000020905	RPL11	-0.009	0.108	0.933852	0.984258	0
2	129242710	129244721	ENSBTAG00000052293		-0.043	0.053	0.417366	0.773407	1
2	129296772	129298371	ENSBTAG00000030425	ID3	-0.164	0.094	0.0891309	0.393847	1
2	129326862	129343702	ENSBTAG00000014400	E2F2	-0.155	0.168	0.356007	0.730301	0
2	129367152	129417868	ENSBTAG00000012263	ASAP3	-0.143	0.117	0.230139	0.597314	0
2	129478393	129483457	ENSBTAG00000002594	ZNF436	-0.071	0.124	0.566645	0.856974	0
2	129500051	129531646	ENSBTAG00000016578	HNRNPR	0.26	0.266	0.328569	0.715094	0
2	129672631	129764693	ENSBTAG00000009502	LUZP1	-0.083	0.076	0.271332	0.633529	0
2	129770258	129836290	ENSBTAG00000009500	KDM1A	0.394	0.264	0.133614	0.472094	0
2	130166509	130173608	ENSBTAG00000011196	C1QB	-0.138	0.081	0.0891309	0.393847	0
2	130178487	130179596	ENSBTAG00000011195		-0.093	0.074	0.193601	0.557799	0
2	130181311	130185682	ENSBTAG00000011193	C1QC	-0.027	0.073	0.711382	0.916253	0
2	130189849	130193588	ENSBTAG00000007153	C1QA	-0.093	0.075	0.230139	0.597314	0
2	130297461	130333090	ENSBTAG00000016448	ZBTB40	0.292	0.181	0.109599	0.430698	0
2	130300980	130301055	ENSBTAG00000045330	bta-mir-2284u	-0.05	0.07	0.475227	0.809106	0
2	130732620	130787969	ENSBTAG00000001700	CDC42	-0.255	0.247	0.317311	0.70242	0
2	130801979	130806189	ENSBTAG00000040602		-0.141	0.122	0.230139	0.597314	0
2	130906818	130976365	ENSBTAG00000017122	HSPG2	0.143	0.066	0.0278069	0.208236	0
2	131012510	131085750	ENSBTAG00000006940	USP48	-0.25	0.326	0.443082	0.789211	0
2	131095681	131165889	ENSBTAG00000008952	RAP1GAP	0.039	0.088	0.657766	0.897448	0
2	131181416	131245100	ENSBTAG00000008951	ALPL	-0.054	0.029	0.0574331	0.316615	0
2	131324608	131449347	ENSBTAG00000002977	ECE1	0.111	0.146	0.447255	0.79259	0
2	131485408	131837484	ENSBTAG00000040215	EIF4G3	-0.26	0.161	0.109599	0.430698	0
2	131855266	131891998	ENSBTAG00000018656	HP1BP3	-0.162	0.337	0.630516	0.88562	0
2	131971819	131985982	ENSBTAG00000006085	DDOST	-0.236	0.203	0.230139	0.597314	1
2	131986298	132006686	ENSBTAG00000006084	PINK1	0.059	0.215	0.784085	0.939433	1
2	132018286	132042156	ENSBTAG00000052516	CDA	-0.031	0.067	0.643364	0.892269	0
2	132115901	132123552	ENSBTAG00000020850	MUL1	-0.072	0.176	0.68254	0.90841	0
2	132136807	132139923	ENSBTAG00000009156	CAMK2N1	-0.257	0.085	0.0026998	0.0440685	0
2	132802975	132831792	ENSBTAG00000017108	OTUD3	0.112	0.139	0.420243	0.775414	0
2	132915932	133020007	ENSBTAG00000007998	TMCO4	-0.19	0.173	0.271332	0.633529	1
2	133022950	133035378	ENSBTAG00000007996	HTR6	0.112	0.092	0.230139	0.597314	0
2	133073788	133110076	ENSBTAG00000050219		0.032	0.118	0.786391	0.94004	0
2	133201115	133340081	ENSBTAG00000004554	CAPZB	0.155	0.231	0.502221	0.824926	0
2	133346903	133363429	ENSBTAG00000013650	SLC66A1	-0.372	0.142	0.00932238	0.106629	0
2	133363649	133369985	ENSBTAG00000012289	AKR7A2	-0.04	0.118	0.73461	0.924275	0
2	133387813	133397275	ENSBTAG00000026758		-0.302	0.103	0.00373163	0.0560907	0
2	133405836	133411304	ENSBTAG00000011951	MRTO4	0.05	0.16	0.755041	0.930605	0
2	133406871	133434408	ENSBTAG00000011950	EMC1	-0.493	0.172	0.00373163	0.0560907	0
2	133452143	133589435	ENSBTAG00000015240	UBR4	-0.172	0.155	0.271332	0.633529	1
2	133705999	133751262	ENSBTAG00000030340	IFFO2	-0.129	0.101	0.193601	0.557799	1
2	133756949	133790322	ENSBTAG00000030335	ALDH4A1	0.152	0.109	0.161513	0.515199	0
2	134985221	135154958	ENSBTAG00000000684	ARHGEF10L	0.168	0.109	0.133614	0.472094	0
2	135211439	135237283	ENSBTAG00000008579	RCC2	0.012	0.239	0.960122	0.988591	0
2	135262232	135290548	ENSBTAG00000012052	PADI4	0.021	0.07	0.764177	0.934516	0
2	135316332	135346269	ENSBTAG00000012043	PADI3	-0.026	0.053	0.623426	0.882289	0
2	135473410	135527194	ENSBTAG00000003403	PADI2	0.2	0.081	0.0124193	0.127509	0
2	135548907	135578120	ENSBTAG00000008314	SDHB	0.192	0.154	0.230139	0.597314	0
2	135586322	135606413	ENSBTAG00000008309	ATP13A2	0.215	0.113	0.0574331	0.316615	0
2	135617021	135668617	ENSBTAG00000003822	CROCC	0.037	0.103	0.719595	0.919931	0
2	135674410	135688455	ENSBTAG00000013282	NECAP2	-0.08	0.208	0.700237	0.91406	0
2	135698556	135736414	ENSBTAG00000013281	SPATA21	0.05	0.074	0.499041	0.823913	0
2	135738977	135759581	ENSBTAG00000009251	SZRD1	0.047	0.205	0.818869	0.951287	1
2	135760965	135764603	ENSBTAG00000051080		0.062	0.057	0.271332	0.633529	1
2	135769852	135770058	ENSBTAG00000052646		0.165	0.128	0.193601	0.557799	1
2	135783522	135863766	ENSBTAG00000008510	FBXO42	0.172	0.206	0.403718	0.764965	1
2	135877622	135881588	ENSBTAG00000014221	CPLANE2	-0.109	0.094	0.230139	0.597314	0
2	136187677	136189647	ENSBTAG00000048513		-0.077	0.032	0.0163951	0.152243	0
3	310346	330047	ENSBTAG00000037819	SFT2D2	-0.068	0.127	0.59265	0.868739	0
3	386406	455451	ENSBTAG00000005393	TIPRL	0.061	0.225	0.786391	0.94004	0
3	507209	561418	ENSBTAG00000000616	GPR161	0.085	0.085	0.317311	0.70242	0
3	572630	752300	ENSBTAG00000020969	DCAF6	0.225	0.318	0.478945	0.810592	0
3	752398	783103	ENSBTAG00000020968	MPC2	0.033	0.161	0.837572	0.956005	0
3	1011191	1083046	ENSBTAG00000014151	RCSD1	0.24	0.371	0.517632	0.832434	0
3	1148816	1160249	ENSBTAG00000008931	CREG1	0.379	0.117	0.00137428	0.0266686	0
3	1182748	1266862	ENSBTAG00000012700	CD247	0.107	0.144	0.457482	0.798412	0
3	1280068	1481060	ENSBTAG00000024534	POU2F1	-0.071	0.084	0.398111	0.759853	0
3	1903037	1970272	ENSBTAG00000019497	ILDR2	0.007	0.096	0.941806	0.985598	0
3	2034404	2050406	ENSBTAG00000010456	TADA1	0.021	0.22	0.924315	0.982883	0
3	2051963	2069922	ENSBTAG00000010775	POGK	-0.465	0.266	0.0891309	0.393847	0
3	2984979	3059465	ENSBTAG00000044150	UCK2	-0.051	0.199	0.797951	0.943512	0
3	3105832	3191071	ENSBTAG00000010009	TMCO1	-0.548	0.258	0.0357288	0.242894	0
3	3220577	3249677	ENSBTAG00000017852	ALDH9A1	-0.213	0.208	0.317311	0.70242	0
3	3264993	3288716	ENSBTAG00000010265	MGST3	-0.118	0.131	0.367588	0.737884	0
3	4147294	4246502	ENSBTAG00000013801	PBX1	0.026	0.075	0.728591	0.922495	0
3	5412200	5495030	ENSBTAG00000054045		-0.057	0.055	0.317311	0.70242	0
3	5960360	5998691	ENSBTAG00000007247	NUF2	-0.158	0.12	0.193601	0.557799	0
3	6634642	6664654	ENSBTAG00000005976	HSD17B7	-0.688	0.196	0.000465258	0.0112163	0
3	6677596	6853843	ENSBTAG00000004885	DDR2	-0.078	0.077	0.317311	0.70242	0
3	6906319	6938634	ENSBTAG00000010206	UAP1	-0.379	0.217	0.0891309	0.393847	0
3	6980659	7000320	ENSBTAG00000012694	UHMK1	-0.033	0.076	0.664288	0.900467	0
3	7067271	7094798	ENSBTAG00000054194	SH2D1B	0.008	0.086	0.925904	0.982999	0
3	7107837	7126810	ENSBTAG00000050790	C3H1orf226	-0.236	0.079	0.0026998	0.0440685	0
3	7135834	7264277	ENSBTAG00000010158	NOS1AP	-0.006	0.036	0.86737	0.966262	0
3	7599092	7846132	ENSBTAG00000005227	ATF6	-0.001	0.111	0.992819	0.997274	0
3	7851912	7861112	ENSBTAG00000021754	DUSP12	-0.049	0.198	0.804908	0.945673	0
3	7901534	7907964	ENSBTAG00000034159	FCRLA	0.043	0.108	0.69063	0.911081	0
3	7931201	7947765	ENSBTAG00000021842	FCGR2B	0.236	0.138	0.0891309	0.393847	0
3	8000299	8008181	ENSBTAG00000002096	FCGR3A	-0.2	0.109	0.0718606	0.354245	0
3	8031683	8034120	ENSBTAG00000039035	HSPA6	-0.09	0.113	0.426032	0.778461	0
3	8035858	8044343	ENSBTAG00000038124	FCGR2A	0.01	0.091	0.912409	0.980705	0
3	8143059	8175606	ENSBTAG00000015856	CFAP126	-0.384	0.124	0.00193521	0.0343136	0
3	8177617	8208058	ENSBTAG00000015853	SDHC	-0.482	0.128	0.000144696	0.00458058	0
3	8275799	8280141	ENSBTAG00000009213	TOMM40L	0.082	0.256	0.748968	0.928783	0
3	8286937	8290169	ENSBTAG00000024503	FCER1G	-0.144	0.099	0.133614	0.472094	0
3	8290744	8300810	ENSBTAG00000002203	NDUFS2	-0.032	0.19	0.866583	0.966159	0
3	8321014	8326857	ENSBTAG00000021897	B4GALT3	0.047	0.228	0.836791	0.955723	0
3	8326933	8330785	ENSBTAG00000021894	PPOX	0.07	0.193	0.716605	0.918356	0
3	8331489	8337654	ENSBTAG00000021893	USP21	0.069	0.262	0.792551	0.941478	0
3	8338252	8362436	ENSBTAG00000021705	UFC1	0.128	0.147	0.383754	0.751105	0
3	8363117	8373311	ENSBTAG00000020154	DEDD	0.06	0.284	0.832887	0.954918	0
3	8373204	8376843	ENSBTAG00000020153	NIT1	-0.083	0.201	0.679607	0.90701	0
3	8376916	8388862	ENSBTAG00000020152	PFDN2	0.107	0.139	0.4413	0.788053	0
3	8420191	8435163	ENSBTAG00000017875	ARHGAP30	0.497	0.245	0.0455003	0.279604	0
3	8436890	8442549	ENSBTAG00000017873	USF1	-0.045	0.201	0.822757	0.952275	0
3	8442910	8444112	ENSBTAG00000017856	TSTD1	0.138	0.121	0.271332	0.633529	0
3	8464412	8488977	ENSBTAG00000017846	F11R	-0.03	0.085	0.724088	0.920699	0
3	8694108	8697521	ENSBTAG00000046231		-0.075	0.197	0.703203	0.914361	0
3	8695315	8755426	ENSBTAG00000002951	CD244	0.305	0.169	0.0718606	0.354245	0
3	8760842	8788290	ENSBTAG00000002947	LY9	-0.078	0.271	0.773347	0.937136	0
3	8802581	8816310	ENSBTAG00000010458		-0.194	0.149	0.193601	0.557799	0
3	8848948	8864962	ENSBTAG00000001197	SLAMF7	0.179	0.172	0.317311	0.70242	0
3	8901877	8932543	ENSBTAG00000011238	CD48	-0.187	0.149	0.193601	0.557799	0
3	8969591	9008636	ENSBTAG00000007927	SLAMF1	0.018	0.191	0.925109	0.982999	0
3	9076733	9119524	ENSBTAG00000019033	CD84	0.136	0.134	0.317311	0.70242	0
3	9152844	9174085	ENSBTAG00000014368	SLAMF6	0.063	0.178	0.723339	0.920699	0
3	9324285	9350657	ENSBTAG00000004334	NCSTN	-0.32	0.255	0.193601	0.557799	0
3	9350633	9394688	ENSBTAG00000004333	COPA	-0.405	0.411	0.324624	0.711241	0
3	9399899	9405346	ENSBTAG00000007537	PEX19	-0.481	0.277	0.0891309	0.393847	0
3	9420056	9462754	ENSBTAG00000005796	DCAF8	0.059	0.462	0.898149	0.976767	0
3	9460717	9471684	ENSBTAG00000005793	PEA15	-0.867	0.189	4.22491e-06	0.000227311	0
3	9577152	9584516	ENSBTAG00000009982	IGSF8	0.059	0.116	0.610752	0.877625	0
3	9644360	9647791	ENSBTAG00000002419	PIGM	-0.037	0.238	0.876821	0.970667	0
3	9761198	9769010	ENSBTAG00000002068	TAGLN2	-0.037	0.139	0.790239	0.941074	0
3	9764117	9764189	ENSBTAG00000044526	bta-mir-1584	0.057	0.061	0.350304	0.726093	0
3	9850404	9860647	ENSBTAG00000016698	SLAMF8	-0.114	0.066	0.0891309	0.393847	0
3	9870119	9891157	ENSBTAG00000017786	FCRL6	0.003	0.043	0.944194	0.985803	0
3	9912927	9914349	ENSBTAG00000004776	DUSP23	-0.042	0.094	0.654875	0.896725	0
3	10419633	10425891	ENSBTAG00000012887	FCER1A	0.074	0.1	0.4593	0.799803	0
3	10700383	10745178	ENSBTAG00000011511		-0.162	0.179	0.365465	0.73669	0
3	11350806	11351297	ENSBTAG00000026848		0.109	0.079	0.161513	0.515199	0
3	11417226	11422750	ENSBTAG00000039366		-0.354	0.098	0.000318217	0.00832812	0
3	11606607	11610099	ENSBTAG00000009421	CD1E	0.334	0.075	6.79535e-06	0.0003477	0
3	11746000	11749447	ENSBTAG00000022893		-0.008	0.029	0.782548	0.938758	0
3	11769505	11770927	ENSBTAG00000048613		0.062	0.124	0.617075	0.879151	0
3	11858601	11863244	ENSBTAG00000054063	CD1A	-0.12	0.05	0.0163951	0.152243	0
3	11914670	11919678	ENSBTAG00000039993	CD1D	-0.459	0.133	0.000465258	0.0112163	0
3	12021859	12154133	ENSBTAG00000024960		0.364	0.148	0.0124193	0.127509	0
3	12508921	12526879	ENSBTAG00000022514	CD5L	0.008	0.032	0.802587	0.944806	0
3	12577541	12610184	ENSBTAG00000005891	FCRL1	-0.012	0.136	0.929877	0.983625	0
3	12615376	12631769	ENSBTAG00000051681		-0.015	0.067	0.822757	0.952275	0
3	12636941	12680489	ENSBTAG00000039702	FCRL3	-0.271	0.104	0.00932238	0.106629	0
3	12748565	12778379	ENSBTAG00000054233	FCRL4	0.031	0.09	0.730846	0.923112	0
3	12804191	12868240	ENSBTAG00000000964	FCRL5	0.136	0.168	0.41794	0.773671	0
3	12902008	12991375	ENSBTAG00000053098		-0.249	0.157	0.109599	0.430698	0
3	13048396	13068048	ENSBTAG00000052866		-0.006	0.126	0.961716	0.98886	0
3	13430503	13433681	ENSBTAG00000049257		0.008	0.062	0.897358	0.9765	0
3	13500082	13506052	ENSBTAG00000049942		0.019	0.057	0.739134	0.92436	0
3	13522686	13526418	ENSBTAG00000053563		-0.026	0.065	0.689157	0.910739	0
3	13730370	13744313	ENSBTAG00000008649	ETV3	-0.064	0.159	0.686948	0.910604	0
3	13871481	13922860	ENSBTAG00000012361	ARHGEF11	-0.006	0.128	0.962513	0.98886	0
3	13925709	13938001	ENSBTAG00000012348	LRRC71	-0.018	0.064	0.77871	0.938194	0
3	14027673	14037569	ENSBTAG00000024470	SH2D2A	-0.013	0.119	0.913202	0.980969	0
3	14042676	14070433	ENSBTAG00000000608	PRCC	-0.02	0.209	0.923521	0.982872	0
3	14082643	14098646	ENSBTAG00000039793	HDGF	0.047	0.215	0.82665	0.953698	0
3	14098949	14105919	ENSBTAG00000001519	RRNAD1	0.149	0.224	0.50605	0.827207	0
3	14106347	14111649	ENSBTAG00000001518	ISG20L2	-0.02	0.233	0.931466	0.983823	0
3	14159893	14168905	ENSBTAG00000015794	NES	-0.014	0.034	0.680339	0.907312	0
3	14232918	14240979	ENSBTAG00000000406	GPATCH4	0.203	0.146	0.161513	0.515199	0
3	14237515	14244262	ENSBTAG00000000404	NAXE	-0.125	0.136	0.358096	0.731598	0
3	14259699	14299013	ENSBTAG00000006882	IQGAP3	0.057	0.094	0.544515	0.847534	0
3	14304650	14305160	ENSBTAG00000021649		-0.014	0.081	0.862651	0.965381	0
3	14329333	14359887	ENSBTAG00000046545	MEF2D	-0.077	0.127	0.544515	0.847534	0
3	14486486	14501164	ENSBTAG00000006370	CCT3	0.315	0.183	0.0891309	0.393847	0
3	14506327	14509256	ENSBTAG00000006364	GLMP	0.27	0.21	0.193601	0.557799	0
3	14509511	14515615	ENSBTAG00000009436	TMEM79	0.032	0.226	0.88708	0.973939	0
3	14517240	14544995	ENSBTAG00000009435	SMG5	-0.111	0.252	0.659937	0.898162	0
3	14546206	14551083	ENSBTAG00000009434	PAQR6	0.013	0.15	0.930672	0.983801	0
3	14553830	14575605	ENSBTAG00000009432	PMF1	0.002	0.122	0.987234	0.996295	0
3	14575798	14592765	ENSBTAG00000009431	SLC25A44	-0.148	0.289	0.608651	0.87732	0
3	14606839	14627449	ENSBTAG00000012228	SEMA4A	-0.194	0.159	0.230139	0.597314	0
3	14642915	14670926	ENSBTAG00000017574	LMNA	0.054	0.106	0.610752	0.877625	0
3	14709191	14713057	ENSBTAG00000011754	LAMTOR2	0.06	0.101	0.552512	0.850687	0
3	14713270	14728924	ENSBTAG00000001548	UBQLN4	-0.17	0.276	0.537895	0.84381	0
3	14754110	14760797	ENSBTAG00000001212	SSR2	0.169	0.119	0.161513	0.515199	0
3	14781460	14813371	ENSBTAG00000000113	ARHGEF2	-0.298	0.256	0.230139	0.597314	0
3	14834858	14852135	ENSBTAG00000000108	KHDC4	-0.078	0.234	0.739134	0.92436	0
3	14853319	14862517	ENSBTAG00000000105	RIT1	-0.078	0.233	0.737625	0.924317	0
3	14871960	14949656	ENSBTAG00000011209	SYT11	-0.121	0.105	0.230139	0.597314	0
3	14893062	15038514	ENSBTAG00000020356	GON4L	0.053	0.229	0.817315	0.950186	0
3	14913465	14932571	ENSBTAG00000045596		-0.087	0.176	0.621306	0.881174	0
3	14977448	14977753	ENSBTAG00000052792		0.098	0.108	0.364407	0.736333	0
3	15038527	15042707	ENSBTAG00000026613	MSTO1	0.318	0.189	0.0891309	0.393847	0
3	15051165	15090850	ENSBTAG00000001199	DAP3	0.367	0.366	0.317311	0.70242	0
3	15121790	15298435	ENSBTAG00000003954	ASH1L	-0.072	0.1	0.471525	0.806747	0
3	15301261	15310732	ENSBTAG00000054061	RUSC1	-0.053	0.148	0.720343	0.920043	1
3	15311058	15320377	ENSBTAG00000003948	FDPS	0.06	0.22	0.784853	0.939545	1
3	15344675	15354053	ENSBTAG00000017056	PKLR	0.186	0.156	0.230139	0.597314	1
3	15367523	15376512	ENSBTAG00000014393	CLK2	0.208	0.294	0.479566	0.810877	1
3	15376265	15381469	ENSBTAG00000012094	SCAMP3	0.143	0.193	0.458693	0.799525	1
3	15382809	15387801	ENSBTAG00000047731	FAM189B	-0.141	0.179	0.430697	0.782155	1
3	15390177	15409004	ENSBTAG00000014841	GBA	-0.363	0.212	0.0891309	0.393847	1
3	15409490	15414531	ENSBTAG00000014840	MTX1	0.187	0.164	0.271332	0.633529	1
3	15444041	15446577	ENSBTAG00000010617	KRTCAP2	0.1	0.115	0.3843	0.751105	1
3	15462231	15462806	ENSBTAG00000003535	DPM3	0.065	0.097	0.502858	0.825324	1
3	15463443	15465501	ENSBTAG00000003083	SLC50A1	0.439	0.149	0.00373163	0.0560907	1
3	15466566	15473164	ENSBTAG00000020244	EFNA1	0.112	0.136	0.40994	0.768966	1
3	15538260	15548475	ENSBTAG00000010663	ADAM15	-0.342	0.107	0.00137428	0.0266686	1
3	15577907	15593999	ENSBTAG00000021512	ZBTB7B	-0.134	0.142	0.34517	0.723707	0
3	15602874	15609853	ENSBTAG00000000186	FLAD1	0.125	0.169	0.4593	0.799803	0
3	15612556	15616057	ENSBTAG00000024476	CKS1B	-0.016	0.141	0.910031	0.979997	0
3	15616454	15626916	ENSBTAG00000019838	SHC1	-0.268	0.297	0.367057	0.737763	0
3	15627232	15643667	ENSBTAG00000004552	PBXIP1	0.148	0.249	0.552512	0.850687	0
3	15659639	15669862	ENSBTAG00000017819	PMVK	-0.045	0.187	0.809555	0.947138	0
3	15725419	15891605	ENSBTAG00000018249	KCNN3	0.35	0.147	0.0163951	0.152243	0
3	15968147	15994363	ENSBTAG00000007519	ADAR	-0.161	0.119	0.161513	0.515199	0
3	16022438	16032162	ENSBTAG00000007515	UBE2Q1	0.706	0.304	0.0214482	0.177124	0
3	16032551	16081469	ENSBTAG00000011881	TDRD10	-0.004	0.033	0.903691	0.978465	0
3	16086187	16104559	ENSBTAG00000020542	SHE	0.008	0.05	0.872881	0.968443	0
3	16119373	16173990	ENSBTAG00000018474	IL6R	-0.109	0.142	0.442487	0.788937	0
3	16210799	16232969	ENSBTAG00000005161	ATP8B2	-0.045	0.186	0.80878	0.946673	0
3	16250174	16252803	ENSBTAG00000013025	HAX1	0.157	0.196	0.423132	0.777237	0
3	16260349	16300420	ENSBTAG00000004271	UBAP2L	0.087	0.206	0.673025	0.903807	0
3	16300763	16309171	ENSBTAG00000020026	C3H1orf43	0.224	0.244	0.358619	0.731951	0
3	16318632	16346043	ENSBTAG00000033217	TPM3	0.128	0.247	0.604458	0.875705	0
3	16347123	16447546	ENSBTAG00000004987	NUP210L	0.039	0.159	0.806456	0.945985	0
3	16447956	16449471	ENSBTAG00000013866	RPS27	0.074	0.099	0.455064	0.798078	0
3	16449707	16450084	ENSBTAG00000018987		0.022	0.088	0.802587	0.944806	0
3	16453323	16457405	ENSBTAG00000017604	RAB13	0.054	0.056	0.335046	0.719201	0
3	16461551	16465986	ENSBTAG00000014694	JTB	0.113	0.141	0.423132	0.777237	0
3	16473115	16477147	ENSBTAG00000011284	SLC39A1	-0.238	0.17	0.161513	0.515199	0
3	16477455	16487230	ENSBTAG00000017942	CRTC2	0.075	0.211	0.72259	0.920567	0
3	16489959	16502409	ENSBTAG00000018711	DENND4B	-0.328	0.171	0.0574331	0.316615	0
3	16574943	16586974	ENSBTAG00000006678	GATAD2B	-0.09	0.144	0.531971	0.840745	0
3	16619248	16624026	ENSBTAG00000021862	SLC27A3	-0.222	0.127	0.0891309	0.393847	0
3	16625276	16664624	ENSBTAG00000006235	INTS3	-0.151	0.261	0.562589	0.85507	0
3	16711945	16723007	ENSBTAG00000012471	ILF2	0.238	0.24	0.321198	0.708024	0
3	16722663	16724347	ENSBTAG00000012470	SNAPIN	-0.127	0.207	0.539215	0.844528	0
3	16739580	16750665	ENSBTAG00000005166	CHTOP	-0.003	0.424	0.994415	0.997917	0
3	16751302	16755589	ENSBTAG00000005163	S100A1	-0.048	0.065	0.460514	0.800251	0
3	16756363	16772529	ENSBTAG00000021378	S100A13	0.032	0.115	0.781012	0.938353	0
3	16766542	16768597	ENSBTAG00000021377	S100A14	0	0.05	1	1	0
3	16824126	16826559	ENSBTAG00000019203	S100A4	0.036	0.091	0.692105	0.911081	0
3	16832974	16835826	ENSBTAG00000051765		-0.097	0.109	0.373466	0.742666	0
3	17085577	17086827	ENSBTAG00000012640	S100A8	-0.07	0.073	0.337559	0.720647	0
3	17102722	17104173	ENSBTAG00000012638	S100A12	0.056	0.084	0.504772	0.825763	0
3	17115128	17117984	ENSBTAG00000006505	S100A9	0.04	0.077	0.603761	0.875303	0
3	17126512	17142568	ENSBTAG00000054765	PGLYRP4	0.052	0.046	0.271332	0.633529	0
3	17212343	17213356	ENSBTAG00000048718	LORICRIN	0.042	0.031	0.161513	0.515199	0
3	17753492	17755310	ENSBTAG00000013507		0.054	0.031	0.0891309	0.393847	0
3	18249209	18251674	ENSBTAG00000032446		-0.014	0.111	0.899732	0.976963	0
3	18339337	18345396	ENSBTAG00000054258		0.012	0.028	0.667923	0.901495	0
3	18406054	18410949	ENSBTAG00000054333		0.012	0.029	0.678874	0.906708	0
3	18619535	18627090	ENSBTAG00000053103		-0.021	0.024	0.381574	0.750692	0
3	18727498	18733580	ENSBTAG00000015145	S100A11	-0.112	0.108	0.317311	0.70242	0
3	18762472	18773422	ENSBTAG00000015147	S100A10	-0.192	0.135	0.161513	0.515199	0
3	18844273	18892924	ENSBTAG00000004772	THEM4	-0.222	0.178	0.230139	0.597314	0
3	18953213	18980402	ENSBTAG00000017405	RORC	0.079	0.111	0.476465	0.80941	0
3	18992376	19014072	ENSBTAG00000021594	TDRKH	-0.098	0.111	0.377236	0.746847	0
3	19021833	19028884	ENSBTAG00000000797	MRPL9	-0.232	0.141	0.109599	0.430698	0
3	19085294	19166836	ENSBTAG00000001942	SNX27	0.144	0.241	0.54984	0.849913	0
3	19199747	19250840	ENSBTAG00000017566	TUFT1	-0.014	0.054	0.795635	0.942552	0
3	19252157	19277508	ENSBTAG00000017564	CGN	0.079	0.106	0.456272	0.798078	0
3	19322591	19369632	ENSBTAG00000021289	POGZ	0.159	0.167	0.341097	0.722638	0
3	19371017	19374091	ENSBTAG00000021288	PSMB4	-0.118	0.128	0.356529	0.730301	0
3	19463618	19470141	ENSBTAG00000017580	RFX5	-0.057	0.158	0.718099	0.91905	0
3	19481062	19509852	ENSBTAG00000007320	PI4KB	-0.048	0.243	0.843045	0.957891	0
3	19509778	19518770	ENSBTAG00000007318	ZNF687	-0.024	0.183	0.895775	0.976232	0
3	19555183	19565649	ENSBTAG00000006101	PSMD4	-0.284	0.17	0.0891309	0.393847	0
3	19572074	19611272	ENSBTAG00000006099	PIP5K1A	0.166	0.277	0.549173	0.849825	0
3	19623986	19636738	ENSBTAG00000018074	VPS72	-0.803	0.235	0.000673859	0.0153034	0
3	19637443	19641926	ENSBTAG00000018071	TMOD4	0.364	0.097	0.000144696	0.00458058	0
3	19642451	19644982	ENSBTAG00000018070	SCNM1	-0.196	0.16	0.230139	0.597314	0
3	19645437	19653958	ENSBTAG00000020395	LYSMD1	0.018	0.187	0.923521	0.982872	0
3	19653958	19656771	ENSBTAG00000020394	TNFAIP8L2	-0.107	0.136	0.431282	0.782424	0
3	19673523	19687033	ENSBTAG00000007281	SEMA6C	0.073	0.076	0.336552	0.719969	0
3	19698284	19715704	ENSBTAG00000015371	GABPB2	0.025	0.101	0.804134	0.945561	0
3	19721037	19726107	ENSBTAG00000015369	MLLT11	-0.145	0.152	0.340084	0.722638	0
3	19726452	19734555	ENSBTAG00000015363	CDC42SE1	0.091	0.368	0.804908	0.945673	0
3	19744729	19764785	ENSBTAG00000015336	PRUNE1	0.371	0.321	0.230139	0.597314	0
3	19766326	19775894	ENSBTAG00000015329	MINDY1	0.173	0.11	0.109599	0.430698	0
3	19792564	19804799	ENSBTAG00000000099	CERS2	0.248	0.29	0.392551	0.756635	0
3	19801955	19834258	ENSBTAG00000000098	SETDB1	-0.055	0.244	0.821979	0.952165	0
3	19884889	19949933	ENSBTAG00000021037	ARNT	-0.073	0.16	0.64839	0.894882	0
3	19953196	19966177	ENSBTAG00000021035	CTSK	-0.013	0.178	0.941806	0.985598	0
3	19981529	20004455	ENSBTAG00000017135	CTSS	-0.129	0.106	0.230139	0.597314	0
3	20036707	20083521	ENSBTAG00000020357	GOLPH3L	0.098	0.223	0.660662	0.89827	0
3	20098776	20104404	ENSBTAG00000007123	ENSA	-0.583	0.221	0.00932238	0.106629	0
3	20129373	20134008	ENSBTAG00000015154	MCL1	-0.212	0.266	0.425451	0.778461	0
3	20143733	20155185	ENSBTAG00000003604	ADAMTSL4	-0.141	0.131	0.271332	0.633529	0
3	20183480	20191176	ENSBTAG00000003806	ECM1	-0.177	0.085	0.0357288	0.242894	0
3	20190884	20202510	ENSBTAG00000003799	TARS2	-0.119	0.31	0.700978	0.91406	0
3	20203827	20302019	ENSBTAG00000014984	RPRD2	0.17	0.173	0.325607	0.711241	0
3	20311487	20330731	ENSBTAG00000013946	PRPF3	0.223	0.235	0.342621	0.722795	0
3	20338181	20351092	ENSBTAG00000024378	MRPS21	-0.197	0.159	0.230139	0.597314	0
3	20363111	20369973	ENSBTAG00000021485	C3H1orf54	-0.23	0.103	0.0278069	0.208236	0
3	20372002	20376143	ENSBTAG00000021482	APH1A	-0.069	0.171	0.686213	0.910496	0
3	20409567	20423408	ENSBTAG00000016730	ANP32E	0.117	0.189	0.535916	0.842625	0
3	20475129	20485097	ENSBTAG00000004852	PLEKHO1	-0.438	0.121	0.000318217	0.00832812	0
3	20490334	20556989	ENSBTAG00000020635	VPS45	0.075	0.224	0.737625	0.924317	0
3	20611449	20666228	ENSBTAG00000001586	OTUD7B	0.161	0.156	0.317311	0.70242	0
3	20681758	20685817	ENSBTAG00000012495	SF3B4	-0.287	0.179	0.109599	0.430698	0
3	20696426	20710108	ENSBTAG00000001599	SV2A	0.247	0.143	0.0891309	0.393847	0
3	20713195	20714518	ENSBTAG00000006050	BOLA1	-0.397	0.123	0.00137428	0.0266686	0
3	20724732	20748213	ENSBTAG00000050122		-0.232	0.164	0.161513	0.515199	0
3	20750777	20767701	ENSBTAG00000032453	H4C14	-0.183	0.056	0.000966848	0.0204391	0
3	20802181	20811180	ENSBTAG00000008592	FCGR1A	0.041	0.056	0.464169	0.802434	0
3	20825101	20863751	ENSBTAG00000037565		0.307	0.149	0.0357288	0.242894	0
3	21179410	21179622	ENSBTAG00000048538		-0.012	0.042	0.774878	0.937723	0
3	21383711	21387865	ENSBTAG00000020060	TXNIP	-0.312	0.204	0.133614	0.472094	0
3	21398790	21402032	ENSBTAG00000013910	POLR3GL	-0.378	0.202	0.0574331	0.316615	0
3	21413252	21415922	ENSBTAG00000008365	ANKRD34A	-0.078	0.084	0.352889	0.72856	0
3	21418275	21448521	ENSBTAG00000008369	RBM8A	-0.034	0.225	0.879976	0.971585	0
3	21449848	21453480	ENSBTAG00000008370		0.087	0.158	0.581634	0.863291	0
3	21454070	21459694	ENSBTAG00000008372	PEX11B	-0.386	0.18	0.0357288	0.242894	0
3	21460548	21477566	ENSBTAG00000008373	ITGA10	-0.033	0.122	0.78716	0.940355	0
3	21481384	21498215	ENSBTAG00000038844	ANKRD35	-0.15	0.066	0.0214482	0.177124	0
3	21505807	21515218	ENSBTAG00000021634	PIAS3	-0.178	0.23	0.438931	0.786849	0
3	21512445	21517734	ENSBTAG00000021635	NUDT17	0.192	0.147	0.193601	0.557799	0
3	21519781	21532978	ENSBTAG00000021637	POLR3C	-0.015	0.199	0.940215	0.985578	0
3	21532899	21598565	ENSBTAG00000008131	RNF115	-0.171	0.251	0.495871	0.822543	0
3	21676094	21677848	ENSBTAG00000053114		0.26	0.084	0.00193521	0.0343136	0
3	21684181	21695746	ENSBTAG00000005810	PDZK1	0.072	0.085	0.396995	0.759227	0
3	21695356	21742236	ENSBTAG00000005809	GPR89A	0.261	0.225	0.230139	0.597314	0
3	21960526	21981430	ENSBTAG00000017051	ACP6	0.147	0.242	0.543851	0.847447	0
3	22002398	22098251	ENSBTAG00000002422	BCL9	-0.109	0.123	0.375618	0.745054	0
3	22381862	22446397	ENSBTAG00000020831	CHD1L	-0.116	0.207	0.575479	0.860474	0
3	22466919	22510019	ENSBTAG00000010841	FMO5	-0.763	0.155	9.58367e-07	5.91827e-05	0
3	22528348	22542857	ENSBTAG00000014387	PRKAB2	-0.168	0.104	0.109599	0.430698	0
3	22756471	23031334	ENSBTAG00000001564	PDE4DIP	-0.368	0.187	0.0455003	0.279604	0
3	23075087	23100499	ENSBTAG00000007712	SEC22B	0.392	0.298	0.193601	0.557799	0
3	23163504	23368572	ENSBTAG00000007909	NOTCH2	-0.074	0.081	0.360717	0.733368	0
3	23565140	23596466	ENSBTAG00000039719	PHGDH	-0.01	0.108	0.925904	0.982999	0
3	23660109	23691442	ENSBTAG00000032187	ZNF697	-0.117	0.061	0.0574331	0.316615	0
3	23999239	24101046	ENSBTAG00000005064	WARS2	0.441	0.243	0.0718606	0.354245	0
3	25251271	25286207	ENSBTAG00000019937	WDR3	-0.055	0.263	0.834448	0.95544	0
3	25299568	25353595	ENSBTAG00000016387	GDAP2	-0.295	0.237	0.230139	0.597314	0
3	25592621	25593796	ENSBTAG00000046509	TENT5C	0.08	0.132	0.544515	0.847534	0
3	25709064	25856341	ENSBTAG00000003586	MAN1A2	-0.098	0.087	0.271332	0.633529	0
3	26012214	26074278	ENSBTAG00000014466	VTCN1	-0.069	0.048	0.161513	0.515199	0
3	26099795	26109125	ENSBTAG00000001748	TRIM45	-0.001	0.109	0.992819	0.997274	0
3	26126025	26179583	ENSBTAG00000015392	TTF2	0.118	0.317	0.709893	0.915952	0
3	26201587	26239599	ENSBTAG00000018203	CD101	-0.115	0.048	0.0163951	0.152243	0
3	26252748	26331248	ENSBTAG00000008022	PTGFRN	-0.204	0.095	0.0357288	0.242894	0
3	26468671	26483254	ENSBTAG00000017256	CD2	0.151	0.135	0.271332	0.633529	0
3	26574398	26704608	ENSBTAG00000004849	IGSF3	0.046	0.092	0.617075	0.879151	0
3	26709589	26773139	ENSBTAG00000040131	CD58	-0.238	0.154	0.133614	0.472094	0
3	26886560	26919931	ENSBTAG00000001246	ATP1A1	0.061	0.177	0.730094	0.922813	0
3	27624363	27677204	ENSBTAG00000005788	VANGL1	0.056	0.093	0.547174	0.848827	0
3	28254062	28339667	ENSBTAG00000015961	TSPAN2	-0.078	0.128	0.542524	0.847276	0
3	28514070	28514381	ENSBTAG00000032057		0.028	0.031	0.366526	0.737641	0
3	28556518	28562488	ENSBTAG00000015977	SIKE1	0.113	0.137	0.409372	0.768706	0
3	28579009	28614809	ENSBTAG00000000678	CSDE1	-0.23	0.297	0.438931	0.786849	0
3	28614965	28624861	ENSBTAG00000046797	NRAS	-0.096	0.244	0.694319	0.911794	0
3	28661323	28753483	ENSBTAG00000012194	DENND2C	0.145	0.094	0.133614	0.472094	0
3	28755534	28769812	ENSBTAG00000016705	BCAS2	-0.029	0.179	0.871306	0.968409	0
3	28837852	28977392	ENSBTAG00000001499	TRIM33	-0.053	0.123	0.666468	0.901473	0
3	29390850	29394608	ENSBTAG00000011327	OLFML3	0.026	0.098	0.791009	0.941074	0
3	29399811	29449947	ENSBTAG00000011322	HIPK1	-0.041	0.09	0.64839	0.894882	0
3	29473236	29479991	ENSBTAG00000003616	DCLRE1B	0.149	0.189	0.430697	0.782155	0
3	29479664	29489949	ENSBTAG00000003614	AP4B1	-0.162	0.216	0.453255	0.796468	0
3	29498121	29502961	ENSBTAG00000012419	BCL2L15	0.038	0.09	0.673025	0.903807	0
3	29519988	29575960	ENSBTAG00000019617	PTPN22	0.049	0.139	0.724088	0.920699	0
3	29579106	29618905	ENSBTAG00000031940	RSBN1	-0.168	0.13	0.193601	0.557799	0
3	29624990	29696827	ENSBTAG00000019615	PHTF1	-0.196	0.182	0.271332	0.633529	0
3	29703286	29962037	ENSBTAG00000019611	MAGI3	-0.022	0.161	0.891031	0.975753	0
3	30167622	30168359	ENSBTAG00000027172		-0.079	0.077	0.317311	0.70242	0
3	30209587	30272272	ENSBTAG00000008525	LRIG2	-0.089	0.097	0.358619	0.731951	0
3	30382285	30411742	ENSBTAG00000015107	SLC16A1	-0.29	0.157	0.0718606	0.354245	0
3	30617923	30624465	ENSBTAG00000014299	RHOC	-0.143	0.097	0.133614	0.472094	0
3	30624734	30652245	ENSBTAG00000014297	MOV10	0.146	0.222	0.510538	0.829029	0
3	30657802	30701981	ENSBTAG00000014295	CAPZA1	-0.185	0.209	0.376157	0.745534	0
3	30702703	30844632	ENSBTAG00000014294	ST7L	-0.106	0.17	0.532628	0.84104	0
3	30834932	30885081	ENSBTAG00000021602	CTTNBP2NL	0.045	0.078	0.563939	0.856396	0
3	31539743	31550254	ENSBTAG00000018717	DDX20	0.008	0.278	0.976865	0.993749	0
3	31565399	31578746	ENSBTAG00000022580	INKA2	-0.584	0.092	2.97646e-10	4.90959e-08	0
3	31588106	31676077	ENSBTAG00000050904	RAP1A	0.114	0.193	0.55452	0.851061	0
3	31745649	31829058	ENSBTAG00000039738	TMIGD3	-0.062	0.078	0.426614	0.778461	0
3	31834096	31836548	ENSBTAG00000052822		-0.088	0.054	0.109599	0.430698	0
3	31846429	31863330	ENSBTAG00000006441	ATP5PB	0.183	0.16	0.271332	0.633529	0
3	31863581	31873115	ENSBTAG00000014102	WDR77	0.642	0.203	0.00137428	0.0266686	0
3	31890059	31901999	ENSBTAG00000005973	OVGP1	0.304	0.123	0.0124193	0.127509	0
3	32155439	32192735	ENSBTAG00000013578	CHI3L2	-0.3	0.058	1.99289e-07	1.47827e-05	0
3	32204153	32224615	ENSBTAG00000020172	DENND2D	0.331	0.326	0.317311	0.70242	0
3	32227187	32272255	ENSBTAG00000020169	CEPT1	-0.287	0.259	0.271332	0.633529	0
3	32272397	32300821	ENSBTAG00000009888	DRAM2	-0.073	0.171	0.669379	0.902489	0
3	32408226	32428000	ENSBTAG00000012659	LRIF1	-0.232	0.172	0.193601	0.557799	0
3	32494132	32533031	ENSBTAG00000006466	CD53	0.09	0.177	0.611453	0.877625	0
3	32745301	32747031	ENSBTAG00000047879	KCNA3	-0.105	0.101	0.317311	0.70242	0
3	33026800	33031126	ENSBTAG00000014970	LAMTOR5	0.022	0.13	0.865797	0.966055	0
3	33044290	33074902	ENSBTAG00000015380	SLC16A4	-0.004	0.057	0.944194	0.985803	0
3	33088523	33095448	ENSBTAG00000012555	RBM15	-0.001	0.148	0.994415	0.997917	0
3	33193740	33216772	ENSBTAG00000007352	KCNC4	-0.156	0.082	0.0574331	0.316615	0
3	33226163	33281966	ENSBTAG00000001981	SLC6A17	-0.358	0.092	9.61927e-05	0.00331283	0
3	33374163	33393926	ENSBTAG00000020964	STRIP1	0.279	0.277	0.317311	0.70242	0
3	33403800	33444827	ENSBTAG00000018893	AHCYL1	0.051	0.343	0.881554	0.971872	0
3	33488957	33509479	ENSBTAG00000000283	CSF1	-0.058	0.098	0.553851	0.851061	0
3	33652466	33655778	ENSBTAG00000001842	GSTM3	-0.169	0.037	4.22491e-06	0.000227311	0
3	33667202	33720169	ENSBTAG00000017765	GSTM1	0.039	0.127	0.758843	0.931994	0
3	33818280	33830235	ENSBTAG00000013018	AMPD2	0.363	0.249	0.133614	0.472094	0
3	33837406	33846790	ENSBTAG00000013017	GNAT2	-0.005	0.08	0.950563	0.987127	0
3	33854858	33899237	ENSBTAG00000013016	GNAI3	0.264	0.234	0.271332	0.633529	0
3	33940232	33945726	ENSBTAG00000014083	AMIGO1	-0.076	0.167	0.649109	0.89489	0
3	33946014	33954930	ENSBTAG00000016643	CYB561D1	-0.002	0.259	0.993617	0.997596	0
3	33956341	33965040	ENSBTAG00000009042	ATXN7L2	0.408	0.218	0.0574331	0.316615	0
3	34012638	34033681	ENSBTAG00000020641	PSMA5	0.101	0.15	0.500947	0.824131	0
3	34036271	34100367	ENSBTAG00000008849	SORT1	-0.332	0.086	9.61927e-05	0.00331283	0
3	34131464	34157519	ENSBTAG00000018804	CELSR2	-0.064	0.097	0.509254	0.828554	0
3	34170143	34190011	ENSBTAG00000012962	SARS1	0.018	0.153	0.906068	0.97884	0
3	34200677	34215659	ENSBTAG00000001136	ELAPOR1	-0.216	0.104	0.0357288	0.242894	0
3	34219155	34239641	ENSBTAG00000051851		-0.271	0.094	0.00373163	0.0560907	0
3	34281165	34281597	ENSBTAG00000045530		-0.072	0.042	0.0891309	0.393847	0
3	34286939	34291820	ENSBTAG00000038979	TMEM167B	0.182	0.262	0.487055	0.816383	0
3	34304171	34311597	ENSBTAG00000049309	TAF13	0.013	0.183	0.943398	0.985783	0
3	34331946	34394375	ENSBTAG00000020384	WDR47	0.248	0.213	0.230139	0.597314	0
3	34397588	34430982	ENSBTAG00000017129	CLCC1	-0.229	0.213	0.271332	0.633529	0
3	34431970	34485343	ENSBTAG00000017124	GPSM2	-0.958	0.181	1.15803e-07	9.01679e-06	0
3	34568247	34622399	ENSBTAG00000007330	STXBP3	-0.248	0.209	0.230139	0.597314	0
3	34673537	34681037	ENSBTAG00000047874	PRPF38B	-0.066	0.186	0.72259	0.920567	0
3	34702129	34714161	ENSBTAG00000008467	HENMT1	0.168	0.087	0.0574331	0.316615	0
3	34726393	34805116	ENSBTAG00000005439	FAM102B	0.072	0.107	0.500947	0.824131	0
3	35038387	35096479	ENSBTAG00000003752	SLC25A24	-0.144	0.148	0.330553	0.716551	0
3	35311502	35742106	ENSBTAG00000031575	VAV3	-0.106	0.123	0.388688	0.752523	0
3	36311513	36312871	ENSBTAG00000039951	PRMT6	0.051	0.192	0.790239	0.941074	0
3	39855791	39883179	ENSBTAG00000019091	RNPC3	0.062	0.098	0.526734	0.837748	0
3	42027458	42039822	ENSBTAG00000005990	S1PR1	0.365	0.227	0.109599	0.430698	0
3	42259115	42299418	ENSBTAG00000019029	DPH5	-0.003	0.243	0.990426	0.997189	0
3	42316067	42410097	ENSBTAG00000019027	SLC30A7	0.29	0.19	0.133614	0.472094	0
3	42410254	42428917	ENSBTAG00000019026	EXTL2	-0.046	0.158	0.771051	0.936074	0
3	42593885	42616930	ENSBTAG00000037539		0.024	0.023	0.317311	0.70242	0
3	42742189	42956403	ENSBTAG00000031439	CDC14A	0.025	0.171	0.883921	0.973199	0
3	43006658	43034731	ENSBTAG00000006321	RTCA	-0.886	0.251	0.000465258	0.0112163	0
3	43039359	43079725	ENSBTAG00000006320	DBT	-0.329	0.199	0.0891309	0.393847	0
3	43120392	43140707	ENSBTAG00000015781	TRMT13	-0.019	0.146	0.896566	0.976232	0
3	43140706	43181017	ENSBTAG00000015778	SASS6	-0.025	0.139	0.857153	0.963547	0
3	43182189	43236013	ENSBTAG00000015776	MFSD14A	-0.374	0.272	0.161513	0.515199	0
3	43249864	43294691	ENSBTAG00000012454	SLC35A3	-0.127	0.165	0.4413	0.788053	0
3	43353479	43432848	ENSBTAG00000006491	AGL	0.144	0.118	0.230139	0.597314	0
3	43472653	43525462	ENSBTAG00000003440	FRRS1	0.081	0.038	0.0357288	0.242894	0
3	44218427	44349718	ENSBTAG00000004591	PLPPR5	0.026	0.051	0.610051	0.877625	0
3	45408337	46330781	ENSBTAG00000031358	DPYD	0.011	0.101	0.913202	0.980969	0
3	46655713	46739928	ENSBTAG00000008809	PTBP2	0.101	0.159	0.525428	0.836947	0
3	48239823	48252404	ENSBTAG00000021537	RWDD3	-0.026	0.161	0.872093	0.968443	0
3	48405843	48504005	ENSBTAG00000004422	ALG14	0.07	0.126	0.578211	0.861885	0
3	48568965	48599126	ENSBTAG00000020345	CNN3	-0.377	0.077	9.58367e-07	5.91827e-05	0
3	48980774	49070167	ENSBTAG00000009698	ABCD3	-0.452	0.229	0.0455003	0.279604	0
3	49238269	49319832	ENSBTAG00000004190	ARHGAP29	0.129	0.063	0.0455003	0.279604	0
3	49581839	49599562	ENSBTAG00000007842	GCLM	-0.255	0.155	0.109599	0.430698	0
3	49610656	49621980	ENSBTAG00000047679	DNTTIP2	-0.122	0.136	0.369719	0.73932	0
3	49691045	49912338	ENSBTAG00000003245	BCAR3	-0.039	0.141	0.78178	0.938758	0
3	49925230	50044652	ENSBTAG00000004383	FNBP1L	-0.045	0.102	0.659213	0.898054	0
3	50084785	50106905	ENSBTAG00000008737	DR1	-0.257	0.23	0.271332	0.633529	0
3	50158524	50163815	ENSBTAG00000055068		0.024	0.076	0.752003	0.929878	0
3	50177447	50290702	ENSBTAG00000027321	CCDC18	-0.015	0.115	0.896566	0.976232	0
3	50290372	50308915	ENSBTAG00000020180	TMED5	-0.288	0.117	0.0124193	0.127509	0
3	50331720	50402638	ENSBTAG00000001393	MTF2	-0.241	0.166	0.133614	0.472094	0
3	50499733	50629771	ENSBTAG00000002028	DIPK1A	-0.437	0.184	0.0163951	0.152243	0
3	50629956	50639054	ENSBTAG00000002026	RPL5	-0.165	0.118	0.161513	0.515199	0
3	50677521	50918603	ENSBTAG00000011363	EVI5	0.001	0.107	0.992819	0.997274	0
3	50945369	50956131	ENSBTAG00000016723	GFI1	-0.284	0.146	0.0574331	0.316615	1
3	50994444	51122558	ENSBTAG00000018739	RPAP2	0.065	0.175	0.710638	0.915952	1
3	51122896	51166887	ENSBTAG00000018737	GLMN	-0.031	0.17	0.855583	0.963491	0
3	51223913	51316954	ENSBTAG00000006167	BTBD8	-0.014	0.123	0.909238	0.979732	0
3	51334931	51372381	ENSBTAG00000005805	EPHX4	-0.183	0.092	0.0455003	0.279604	0
3	51501752	51709606	ENSBTAG00000024269	TGFBR3	0.161	0.113	0.161513	0.515199	0
3	51855684	51880799	ENSBTAG00000016307	CDC7	-0.297	0.184	0.109599	0.430698	0
3	52252198	52348486	ENSBTAG00000011200	ZNF644	0.071	0.154	0.644799	0.893368	0
3	53224391	53259805	ENSBTAG00000019133	ZNF326	0.215	0.227	0.343639	0.722795	0
3	53313193	53443924	ENSBTAG00000020958	LRRC8D	-0.154	0.246	0.531315	0.840745	0
3	53555337	53648204	ENSBTAG00000000900	LRRC8C	-0.079	0.151	0.600974	0.873384	1
3	53688735	53713047	ENSBTAG00000020214	LRRC8B	-0.12	0.114	0.271332	0.633529	1
3	53862077	53888176	ENSBTAG00000038625		-0.091	0.12	0.448451	0.794037	1
3	53907632	53926336	ENSBTAG00000048959		-0.127	0.115	0.271332	0.633529	1
3	54009526	54035069	ENSBTAG00000014857		0.047	0.029	0.109599	0.430698	1
3	54094947	54111586	ENSBTAG00000015060	GBP5	-0.707	0.081	3.31884e-18	2.44735e-15	1
3	54148968	54165067	ENSBTAG00000001143		-0.324	0.124	0.00932238	0.106629	1
3	54187433	54276697	ENSBTAG00000037634		-0.658	0.057	1.31915e-30	2.36242e-27	1
3	54409369	54433538	ENSBTAG00000038938	GBP2	0.283	0.077	0.000215599	0.00630013	0
3	54451265	54507578	ENSBTAG00000014529	GBP4	0.25	0.106	0.0163951	0.152243	0
3	54583803	54594324	ENSBTAG00000031186	GBP6	0.225	0.043	1.99289e-07	1.47827e-05	1
3	54620770	54626951	ENSBTAG00000024272		0.223	0.032	2.55963e-12	7.82621e-10	1
3	54715932	54782223	ENSBTAG00000038233		-0.232	0.116	0.0455003	0.279604	0
3	54790812	54882110	ENSBTAG00000002416		-0.585	0.132	1.08251e-05	0.000530091	1
3	54901260	54983375	ENSBTAG00000017670		0.581	0.103	2.14352e-08	2.05123e-06	1
3	54928686	54989008	ENSBTAG00000000505	KYAT3	0.324	0.181	0.0718606	0.354245	1
3	55014449	55045556	ENSBTAG00000000504	GTF2B	0.676	0.188	0.000318217	0.00832812	0
3	55066989	55200622	ENSBTAG00000021900	PKN2	-0.182	0.105	0.0891309	0.393847	0
3	56698600	56715731	ENSBTAG00000000305	LMO4	0.223	0.249	0.370253	0.739797	0
3	56965464	57144590	ENSBTAG00000017595		0.045	0.072	0.531971	0.840745	0
3	57145264	57188980	ENSBTAG00000052268	SELENOF	-0.366	0.137	0.00693395	0.0881582	1
3	57269358	57314453	ENSBTAG00000031171	SH3GLB1	0.735	0.222	0.000966848	0.0204391	0
3	57355960	57388867	ENSBTAG00000021501		0.232	0.078	0.0026998	0.0440685	0
3	57674210	57713603	ENSBTAG00000012907	ODF2L	-0.219	0.137	0.109599	0.430698	0
3	58374383	58469385	ENSBTAG00000021051	ZNHIT6	0.002	0.142	0.98883	0.997102	0
3	58819705	58829797	ENSBTAG00000013851	BCL10	0.184	0.204	0.367057	0.737763	1
3	58835524	58843022	ENSBTAG00000016326	C3H1orf52	0.113	0.185	0.5412	0.846261	1
3	58890026	58928166	ENSBTAG00000003444	SYDE2	-0.021	0.05	0.674485	0.904606	1
3	59112071	59159718	ENSBTAG00000046773	MCOLN2	0.036	0.185	0.845393	0.958841	0
3	59185581	59269352	ENSBTAG00000003791	LPAR3	-0.148	0.099	0.133614	0.472094	1
3	59398296	59456577	ENSBTAG00000018942	SSX2IP	-0.099	0.106	0.350304	0.726093	0
3	59591885	59600029	ENSBTAG00000008122	GNG5	0.122	0.14	0.383754	0.751105	0
3	59600699	59617167	ENSBTAG00000008118	RPF1	0.079	0.16	0.621306	0.881174	0
3	59884333	60026329	ENSBTAG00000011953	PRKACB	0.101	0.169	0.54984	0.849913	0
3	60110693	60257583	ENSBTAG00000003322	TTLL7	-0.08	0.067	0.230139	0.597314	0
3	66029139	66043630	ENSBTAG00000034349	IFI44	0.012	0.077	0.876033	0.970308	0
3	66053647	66071372	ENSBTAG00000030932	IFI44L	0.046	0.12	0.70172	0.91406	0
3	66664210	66707306	ENSBTAG00000021752	DNAJB4	-0.028	0.188	0.881554	0.971872	0
3	66707375	66737434	ENSBTAG00000008926	FUBP1	0.297	0.235	0.193601	0.557799	0
3	66742753	66798302	ENSBTAG00000008921	NEXN	-0.008	0.048	0.86737	0.966262	0
3	66805158	66883012	ENSBTAG00000031044	MIGA1	0.025	0.117	0.830547	0.95433	0
3	66900556	66959868	ENSBTAG00000020761	USP33	-0.002	0.174	0.991223	0.997189	0
3	66975443	67094023	ENSBTAG00000017419	ZZZ3	-0.11	0.191	0.564615	0.856477	0
3	67430365	67568076	ENSBTAG00000031012	PIGK	-0.44	0.151	0.00373163	0.0560907	0
3	69057556	69065985	ENSBTAG00000018447	RABGGTB	-0.182	0.222	0.412216	0.769781	0
3	69086075	69124464	ENSBTAG00000024240	ACADM	-0.312	0.217	0.161513	0.515199	0
3	69968102	69990582	ENSBTAG00000005196	TYW3	-0.059	0.103	0.566645	0.856974	0
3	69989882	70019359	ENSBTAG00000003162	CRYZ	-0.014	0.11	0.89894	0.976865	0
3	70600177	70608293	ENSBTAG00000038480	FPGT	-0.156	0.159	0.326593	0.713145	0
3	74146776	74163809	ENSBTAG00000002627	ZRANB2	-0.2	0.167	0.230139	0.597314	0
3	74766636	74793722	ENSBTAG00000014791	CTH	0.213	0.127	0.0891309	0.393847	0
3	74830012	74922861	ENSBTAG00000015482	ANKRD13C	0.188	0.236	0.425451	0.778461	0
3	74928249	74964017	ENSBTAG00000015474	SRSF11	-0.003	0.151	0.984043	0.994756	0
3	74977580	75017652	ENSBTAG00000008243	LRRC40	0.268	0.168	0.109599	0.430698	0
3	76768174	76788676	ENSBTAG00000001343	DEPDC1	-0.012	0.094	0.898149	0.976767	0
3	76986509	77037985	ENSBTAG00000052364		0.04	0.025	0.109599	0.430698	0
3	77070780	77186963	ENSBTAG00000012976	WLS	0.072	0.063	0.271332	0.633529	0
3	77489268	77629921	ENSBTAG00000054533	GNG12	-0.092	0.107	0.389789	0.75326	0
3	77648760	77651872	ENSBTAG00000013860	GADD45A	0.037	0.094	0.693581	0.911794	0
3	77922744	77937176	ENSBTAG00000012957	SERBP1	-0.343	0.174	0.0455003	0.279604	0
3	77948658	78035575	ENSBTAG00000009455	IL12RB2	0.217	0.101	0.0357288	0.242894	0
3	78077155	78150856	ENSBTAG00000014983	IL23R	-0.061	0.081	0.45145	0.79575	0
3	78274131	78317314	ENSBTAG00000005445	SLC35D1	0.052	0.101	0.606553	0.875705	0
3	78338108	78408732	ENSBTAG00000005443	MIER1	-0.091	0.132	0.490823	0.819193	0
3	78408935	78508278	ENSBTAG00000005442	DNAI4	-0.041	0.156	0.792551	0.941478	0
3	78957184	79406648	ENSBTAG00000008636	PDE4B	-0.228	0.207	0.271332	0.633529	0
3	79914162	79925489	ENSBTAG00000005909	LEPROT	-0.209	0.277	0.450249	0.794863	0
3	79928534	80107385	ENSBTAG00000030749	DNAJC6	0.354	0.082	1.70798e-05	0.000770189	0
3	80327043	80347232	ENSBTAG00000050297		-0.062	0.059	0.271332	0.633529	0
3	80444566	80584006	ENSBTAG00000003147	JAK1	-0.737	0.314	0.0214482	0.177124	0
3	80788175	81022967	ENSBTAG00000016455	CACHD1	0.217	0.061	0.000318217	0.00832812	0
3	81911178	81978206	ENSBTAG00000019011	PGM1	-0.35	0.18	0.0574331	0.316615	0
3	81994568	82051985	ENSBTAG00000002600	EFCAB7	0.161	0.136	0.230139	0.597314	0
3	82052300	82157897	ENSBTAG00000030710	ITGB3BP	0.151	0.127	0.230139	0.597314	0
3	82149562	82208238	ENSBTAG00000030706	ALG6	0.022	0.215	0.918757	0.98284	0
3	82756143	82852335	ENSBTAG00000010124	ATG4C	0.235	0.173	0.161513	0.515199	0
3	82924988	83115333	ENSBTAG00000019877	DOCK7	-0.311	0.108	0.00373163	0.0560907	0
3	83117927	83129455	ENSBTAG00000020451	USP1	0.31	0.182	0.0891309	0.393847	0
3	83258392	83334028	ENSBTAG00000014382	KANK4	-0.124	0.055	0.0214482	0.177124	0
3	83556891	83936160	ENSBTAG00000021975	PATJ	0.039	0.102	0.702461	0.91406	0
3	83947667	83996285	ENSBTAG00000017161	TM2D1	0.304	0.195	0.109599	0.430698	0
3	84203809	84620790	ENSBTAG00000000074	NFIA	0.106	0.094	0.271332	0.633529	0
3	85836232	85911897	ENSBTAG00000051542		0.312	0.094	0.000966848	0.0204391	0
3	85970057	86038583	ENSBTAG00000053766		0.141	0.079	0.0718606	0.354245	0
3	86053818	86085708	ENSBTAG00000051030		-0.31	0.052	1.97318e-09	2.52405e-07	0
3	86093399	86163267	ENSBTAG00000030671	HOOK1	-0.05	0.067	0.455667	0.798078	0
3	86213982	86718004	ENSBTAG00000030669	FGGY	-0.198	0.198	0.317311	0.70242	0
3	87265962	87268007	ENSBTAG00000004037	JUN	-0.036	0.127	0.777177	0.93806	0
3	87349595	87391325	ENSBTAG00000013961	MYSM1	0.135	0.123	0.271332	0.633529	0
3	87479245	87544530	ENSBTAG00000017326	OMA1	0.156	0.196	0.426032	0.778461	0
3	89608083	89696904	ENSBTAG00000011640	PLPP3	-0.077	0.048	0.109599	0.430698	0
3	91131528	91284630	ENSBTAG00000016990	USP24	-0.156	0.113	0.161513	0.515199	0
3	91411766	91445037	ENSBTAG00000004688	DHCR24	-0.433	0.175	0.0124193	0.127509	0
3	91528851	91530803	ENSBTAG00000040313	PARS2	-0.351	0.166	0.0357288	0.242894	0
3	91536057	91564769	ENSBTAG00000015931	TTC4	0.126	0.339	0.709893	0.915952	0
3	91841230	92006821	ENSBTAG00000010717	SSBP3	0.55	0.216	0.0124193	0.127509	0
3	92016377	92033861	ENSBTAG00000010715	MRPL37	-0.058	0.173	0.737625	0.924317	0
3	92033900	92060024	ENSBTAG00000020037	CYB5RL	0.303	0.202	0.133614	0.472094	0
3	92133467	92177725	ENSBTAG00000009527	TCEANC2	0.203	0.26	0.434802	0.78382	0
3	92177759	92203031	ENSBTAG00000009526	TMEM59	0.025	0.195	0.898149	0.976767	0
3	92241241	92262728	ENSBTAG00000019198	LRRC42	0.215	0.187	0.271332	0.633529	0
3	92263079	92296401	ENSBTAG00000007112	HSPB11	0.046	0.135	0.733104	0.923823	0
3	92329344	92382078	ENSBTAG00000050962	YIPF1	-0.195	0.303	0.519575	0.833022	0
3	92391225	92452345	ENSBTAG00000006625	NDC1	-0.197	0.15	0.193601	0.557799	0
3	92919163	92996508	ENSBTAG00000000736	LRP8	-0.115	0.129	0.372929	0.74207	0
3	93003032	93012322	ENSBTAG00000003485	MAGOH	0.151	0.153	0.323643	0.71054	0
3	93014104	93021970	ENSBTAG00000003484	CZIB	0.179	0.151	0.230139	0.597314	0
3	93032987	93057118	ENSBTAG00000014649	CPT2	0.15	0.207	0.468452	0.804564	0
3	93196003	93249188	ENSBTAG00000054697		-0.095	0.159	0.550507	0.850001	0
3	93275045	93393567	ENSBTAG00000003746	SCP2	-0.16	0.154	0.317311	0.70242	0
3	93541281	93615853	ENSBTAG00000019680	ZYG11B	-0.223	0.17	0.193601	0.557799	0
3	93648200	93667733	ENSBTAG00000002050	COA7	-0.079	0.157	0.614964	0.879151	0
3	93742043	93749741	ENSBTAG00000018281	GPX7	0.193	0.112	0.0891309	0.393847	0
3	93801866	93931333	ENSBTAG00000002721	TUT4	-0.017	0.136	0.900524	0.97723	0
3	93934635	93956227	ENSBTAG00000002720	PRPF38A	-0.198	0.24	0.409372	0.768706	0
3	93962136	93993700	ENSBTAG00000002719	ORC1	0.158	0.135	0.230139	0.597314	0
3	93998822	94011885	ENSBTAG00000015896	CC2D1B	1	0.212	2.60161e-06	0.000148922	0
3	94018750	94201518	ENSBTAG00000014289	ZFYVE9	-0.304	0.149	0.0455003	0.279604	0
3	94255802	94278300	ENSBTAG00000011025	BTF3L4	0.112	0.191	0.557876	0.852765	0
3	94278884	94312525	ENSBTAG00000011024	TXNDC12	0.02	0.214	0.925904	0.982999	0
3	94300981	94301414	ENSBTAG00000050462		0.112	0.124	0.366526	0.737641	0
3	94437449	94540296	ENSBTAG00000021174	NRDC	-0.13	0.309	0.673755	0.904303	0
3	94541126	94702613	ENSBTAG00000021170	OSBPL9	-0.252	0.254	0.321198	0.708024	0
3	94802846	94942191	ENSBTAG00000005542	EPS15	-0.172	0.206	0.403718	0.764965	0
3	95012096	95059039	ENSBTAG00000054545	RNF11	-0.193	0.259	0.456272	0.798078	0
3	95337691	95342769	ENSBTAG00000011059	CDKN2C	0.055	0.166	0.740644	0.925049	0
3	95351469	95849104	ENSBTAG00000014482	FAF1	0.809	0.246	0.000966848	0.0204391	0
3	97468115	97518125	ENSBTAG00000009209	BEND5	0.074	0.105	0.48081	0.811557	0
3	97776435	97942867	ENSBTAG00000003128	SPATA6	0.077	0.103	0.45446	0.797915	0
3	98278655	98494949	ENSBTAG00000054324	TRABD2B	0.096	0.091	0.271332	0.633529	0
3	98832725	98834185	ENSBTAG00000045643	FOXD2	-0.157	0.105	0.133614	0.472094	0
3	98834629	98848961	ENSBTAG00000051070		0.056	0.095	0.555861	0.851659	0
3	98887940	98924294	ENSBTAG00000019956	CMPK1	-0.202	0.153	0.193601	0.557799	0
3	98940131	98990375	ENSBTAG00000017844	STIL	-0.116	0.15	0.439522	0.787009	0
3	99005834	99022661	ENSBTAG00000005029	TAL1	-0.079	0.124	0.524125	0.836039	0
3	99025649	99050629	ENSBTAG00000002555	PDZK1IP1	-0.101	0.061	0.0891309	0.393847	0
3	99069008	99097597	ENSBTAG00000015647	CYP4X1	0.032	0.027	0.230139	0.597314	0
3	99421569	99457891	ENSBTAG00000000097	EFCAB14	-0.025	0.18	0.88945	0.975175	0
3	99466613	99491947	ENSBTAG00000000094	ATPAF1	0.111	0.221	0.615668	0.879151	0
3	99514446	99523394	ENSBTAG00000023551	MOB3C	-0.26	0.198	0.193601	0.557799	0
3	99527442	99573233	ENSBTAG00000019933	MKNK1	-0.059	0.252	0.814985	0.949503	0
3	99716645	99737813	ENSBTAG00000007507	FAAH	0.092	0.132	0.485803	0.81581	0
3	99750594	99773411	ENSBTAG00000015891	NSUN4	0.194	0.191	0.317311	0.70242	0
3	99790133	99799010	ENSBTAG00000009603	UQCRH	-0.05	0.107	0.6405	0.89076	0
3	99799405	99817768	ENSBTAG00000045664	LRRC41	0.054	0.205	0.792551	0.941478	0
3	99817882	99844140	ENSBTAG00000019901	RAD54L	-0.135	0.133	0.317311	0.70242	0
3	99869871	99894001	ENSBTAG00000013322	POMGNT1	0.321	0.2	0.109599	0.430698	0
3	99870307	99881509	ENSBTAG00000024144	LURAP1	0.179	0.051	0.000465258	0.0112163	0
3	99963094	100063831	ENSBTAG00000002979	PIK3R3	0.192	0.115	0.0891309	0.393847	0
3	100071214	100278380	ENSBTAG00000020444	MAST2	-0.063	0.134	0.638355	0.889355	0
3	100332768	100369992	ENSBTAG00000016377	IPP	-0.429	0.184	0.0214482	0.177124	0
3	100376675	100378679	ENSBTAG00000052979	TMEM69	0.355	0.222	0.109599	0.430698	0
3	100418895	100453755	ENSBTAG00000008810	GPBP1L1	0.118	0.322	0.714365	0.917079	0
3	100455525	100459138	ENSBTAG00000008808	CCDC17	-0.005	0.092	0.956935	0.987752	0
3	100461046	100505190	ENSBTAG00000015346	NASP	0.033	0.221	0.881554	0.971872	0
3	100505194	100517388	ENSBTAG00000000497	AKR1A1	0.134	0.125	0.271332	0.633529	0
3	100550576	100565166	ENSBTAG00000003642	PRDX1	-0.093	0.121	0.441893	0.788439	0
3	100566182	100571190	ENSBTAG00000017027	MMACHC	0.032	0.154	0.835229	0.95544	0
3	100579652	100718934	ENSBTAG00000011244	TESK2	0.153	0.166	0.356529	0.730301	0
3	100717214	100731168	ENSBTAG00000011243	TOE1	-0.291	0.187	0.109599	0.430698	0
3	100722449	100731011	ENSBTAG00000011242	MUTYH	0.105	0.186	0.572074	0.858761	0
3	101012745	101037592	ENSBTAG00000012644	UROD	0.003	0.14	0.983246	0.994511	0
3	101040409	101048376	ENSBTAG00000019013	HECTD3	0.089	0.25	0.721841	0.920455	0
3	101059206	101173067	ENSBTAG00000019010	EIF2B3	-0.061	0.185	0.7414	0.925163	0
3	101200435	101205864	ENSBTAG00000039529	BTBD19	-0.199	0.138	0.161513	0.515199	0
3	101208672	101213711	ENSBTAG00000006125	PLK3	0.065	0.185	0.725588	0.921111	0
3	101232560	101235265	ENSBTAG00000015285	RPS8	-0.135	0.117	0.230139	0.597314	0
3	101248621	101266875	ENSBTAG00000015280	KIF2C	-0.133	0.124	0.271332	0.633529	0
3	101354615	101378938	ENSBTAG00000012372	TMEM53	0.053	0.132	0.687684	0.910617	0
3	101373593	101645892	ENSBTAG00000012355	RNF220	0	0.284	1	1	0
3	101700924	101832084	ENSBTAG00000015559	ERI3	-0.226	0.175	0.193601	0.557799	0
3	101832496	101841691	ENSBTAG00000005912	DMAP1	-0.096	0.185	0.603761	0.875303	0
3	101936564	101939528	ENSBTAG00000047871	KLF17	0.019	0.035	0.58713	0.865811	0
3	102033426	102065123	ENSBTAG00000008690	SLC6A9	-0.203	0.138	0.133614	0.472094	0
3	102069299	102079762	ENSBTAG00000011879	B4GALT2	0.212	0.182	0.230139	0.597314	0
3	102080670	102084006	ENSBTAG00000018889	ATP6V0B	-0.089	0.116	0.443082	0.789211	0
3	102085998	102089568	ENSBTAG00000018888	DPH2	0.162	0.255	0.525428	0.836947	0
3	102090696	102111545	ENSBTAG00000018887	IPO13	-0.036	0.245	0.883132	0.9725	0
3	102126891	102311428	ENSBTAG00000017656	ST3GAL3	-0.199	0.157	0.193601	0.557799	0
3	102343085	102382969	ENSBTAG00000002078	KDM4A	-0.061	0.31	0.843828	0.958086	0
3	102414018	102498351	ENSBTAG00000000253	PTPRF	0.083	0.131	0.526081	0.837454	0
3	102573104	102575815	ENSBTAG00000005583	HYI	0.333	0.148	0.0214482	0.177124	0
3	102576579	102603276	ENSBTAG00000005580	SZT2	0.089	0.162	0.583005	0.863998	0
3	102615588	102629288	ENSBTAG00000053060		0.019	0.087	0.827429	0.953982	0
3	102629291	102654464	ENSBTAG00000016899	ELOVL1	0.063	0.266	0.812657	0.948554	0
3	102655232	102659704	ENSBTAG00000009819	CDC20	0.031	0.119	0.794093	0.941792	0
3	102663876	102678104	ENSBTAG00000003781	MPL	-0.015	0.057	0.792551	0.941478	0
3	102694863	102714614	ENSBTAG00000003777	TIE1	0.227	0.078	0.00373163	0.0560907	0
3	102838619	102846235	ENSBTAG00000021544	EBNA1BP2	0.167	0.143	0.230139	0.597314	0
3	103309039	103337423	ENSBTAG00000009617	SLC2A1	-0.411	0.205	0.0455003	0.279604	0
3	103390078	103395435	ENSBTAG00000016028	ZNF691	-0.107	0.281	0.703203	0.914361	0
3	103432470	103438943	ENSBTAG00000017388	SVBP	-0.219	0.115	0.0574331	0.316615	0
3	103464627	103471995	ENSBTAG00000017386	C3H1orf50	-0.148	0.154	0.336552	0.719969	0
3	103472227	103491724	ENSBTAG00000017382	P3H1	0.169	0.24	0.481433	0.812062	0
3	103521364	103539465	ENSBTAG00000017368	YBX1	0.035	0.154	0.820424	0.951682	0
3	103540446	103565396	ENSBTAG00000004590	PPIH	0.223	0.152	0.133614	0.472094	0
3	103567783	103700789	ENSBTAG00000004585	CCDC30	-0.058	0.108	0.591268	0.868538	0
3	103585223	103587396	ENSBTAG00000052771		-0.103	0.143	0.471525	0.806747	0
3	103717321	103720404	ENSBTAG00000012982	PPCS	0.165	0.274	0.547174	0.848827	0
3	103880098	104004083	ENSBTAG00000015887	FOXJ3	-0.198	0.159	0.230139	0.597314	0
3	104109103	104325767	ENSBTAG00000049296		0.116	0.102	0.271332	0.633529	0
3	104538208	104671493	ENSBTAG00000020745	HIVEP3	0.028	0.074	0.705431	0.915264	0
3	104816227	104836692	ENSBTAG00000024115	FOXO6	0.094	0.056	0.0891309	0.393847	0
3	104965053	105188608	ENSBTAG00000001629	SCMH1	-0.056	0.203	0.782548	0.938758	0
3	105201098	105280146	ENSBTAG00000001626	CTPS1	0.214	0.258	0.407104	0.767438	0
3	105445057	105510073	ENSBTAG00000021943	NFYC	0.088	0.21	0.675216	0.904908	0
3	105547552	105567515	ENSBTAG00000018726	RIMS3	0.167	0.063	0.00693395	0.0881582	0
3	105615007	105622276	ENSBTAG00000000533	ZNF684	-0.076	0.068	0.271332	0.633529	0
3	105632530	105644310	ENSBTAG00000000532	EXO5	-0.076	0.143	0.595419	0.870153	0
3	105658238	105673151	ENSBTAG00000039287	ZFP69	0.037	0.217	0.864224	0.965589	0
3	105710017	105757346	ENSBTAG00000021922	SMAP2	0.242	0.219	0.271332	0.633529	0
3	105824376	105867157	ENSBTAG00000044178	ZMPSTE24	-0.241	0.228	0.271332	0.633529	0
3	105894662	105974325	ENSBTAG00000019695	RLF	-0.006	0.182	0.973675	0.992841	0
3	106020188	106037050	ENSBTAG00000013367	PPT1	-0.426	0.143	0.0026998	0.0440685	0
3	106037116	106066200	ENSBTAG00000013363	CAP1	-0.296	0.266	0.271332	0.633529	0
3	106185440	106192263	ENSBTAG00000054059	MYCL	-0.02	0.088	0.820424	0.951682	0
3	106204847	106248823	ENSBTAG00000013832	TRIT1	-0.737	0.242	0.0026998	0.0440685	0
3	106328186	106344433	ENSBTAG00000047314	PPIE	0.051	0.236	0.828988	0.9542	0
3	106494310	106507737	ENSBTAG00000017125	PABPC4	0.227	0.274	0.40767	0.767697	0
3	106591094	106927295	ENSBTAG00000021024	MACF1	0.051	0.093	0.583692	0.8643	0
3	106970587	106976098	ENSBTAG00000010232	NDUFS5	-0.072	0.106	0.497138	0.822722	0
3	106986685	106998848	ENSBTAG00000004715	AKIRIN1	0.19	0.264	0.471525	0.806747	0
3	107111822	107117831	ENSBTAG00000030337	MYCBP	-0.046	0.143	0.747453	0.928465	0
3	107121920	107136338	ENSBTAG00000009368	RRAGC	-0.144	0.349	0.679607	0.90701	0
3	107941137	107957939	ENSBTAG00000002306	UTP11	0.189	0.267	0.478945	0.810592	0
3	107959452	107967135	ENSBTAG00000007300	FHL3	-0.298	0.111	0.00693395	0.0881582	0
3	107971020	107997728	ENSBTAG00000007299	SF3A3	-0.185	0.243	0.446657	0.79254	0
3	108007865	108062243	ENSBTAG00000024107	INPP5B	0.099	0.208	0.634074	0.887237	0
3	108063039	108103478	ENSBTAG00000006511	MTF1	-0.048	0.13	0.712128	0.91629	0
3	108107987	108109056	ENSBTAG00000045776	C3H1orf122	0.006	0.083	0.942602	0.98569	0
3	108109004	108114061	ENSBTAG00000006510	YRDC	-0.128	0.18	0.477084	0.80941	0
3	108198136	108213207	ENSBTAG00000014326	CDCA8	0.022	0.13	0.865797	0.966055	0
3	108213369	108220804	ENSBTAG00000014325	C3H1orf109	0.091	0.274	0.739889	0.924751	0
3	108305087	108331447	ENSBTAG00000003849	GNL2	-0.053	0.244	0.828208	0.954091	0
3	108338106	108355571	ENSBTAG00000016852	SNIP1	-0.364	0.298	0.230139	0.597314	0
3	108368074	108392514	ENSBTAG00000010506	MEAF6	-0.245	0.246	0.31925	0.706464	0
3	108403027	108412520	ENSBTAG00000011316	ZC3H12A	-0.294	0.161	0.0718606	0.354245	0
3	109409054	109410469	ENSBTAG00000054152		0	0.027	1	1	0
3	109418279	109429587	ENSBTAG00000013334	CSF3R	-0.006	0.056	0.914789	0.981328	0
3	109431030	109437161	ENSBTAG00000024097	MRPS15	0.031	0.111	0.780245	0.93833	0
3	109442372	109471653	ENSBTAG00000007994	OSCP1	0.015	0.06	0.802587	0.944806	0
3	109482124	109484586	ENSBTAG00000024096	LSM10	0.05	0.122	0.681806	0.908205	0
3	109485634	109488450	ENSBTAG00000049000		-0.003	0.06	0.960122	0.988591	0
3	109490894	109528385	ENSBTAG00000015969	STK40	-0.309	0.188	0.109599	0.430698	0
3	109535132	109537474	ENSBTAG00000014358	EVA1B	-0.151	0.067	0.0214482	0.177124	0
3	109552463	109625086	ENSBTAG00000024095	THRAP3	-0.119	0.304	0.695797	0.912206	0
3	109649571	109671174	ENSBTAG00000030301	MAP7D1	-0.312	0.174	0.0718606	0.354245	0
3	109676148	109691945	ENSBTAG00000005732	TRAPPC3	-0.185	0.15	0.230139	0.597314	0
3	109722183	109727879	ENSBTAG00000021715	ADPRS	0.076	0.13	0.558548	0.853169	0
3	109752058	109872871	ENSBTAG00000018324	AGO3	-0.026	0.073	0.721841	0.920455	0
3	109877713	109914109	ENSBTAG00000012253	AGO1	-0.194	0.17	0.271332	0.633529	0
3	109947115	109977492	ENSBTAG00000015220	AGO4	-0.093	0.118	0.430697	0.782155	0
3	110021003	110047343	ENSBTAG00000002826	CLSPN	-0.226	0.131	0.0891309	0.393847	0
3	110065619	110066302	ENSBTAG00000038292	C3H1orf216	-0.146	0.139	0.271332	0.633529	0
3	110137178	110174112	ENSBTAG00000002377	PSMB2	0.178	0.141	0.193601	0.557799	0
3	110202070	110210854	ENSBTAG00000016696	NCDN	-0.118	0.181	0.514401	0.830782	0
3	110214078	110307266	ENSBTAG00000016694	KIAA0319L	0.095	0.229	0.678142	0.906213	0
3	110330490	110491582	ENSBTAG00000021023	ZMYM4	-0.045	0.113	0.69063	0.911081	0
3	110557888	110571478	ENSBTAG00000016328	SFPQ	-0.507	0.247	0.0357288	0.242894	0
3	110581767	110623103	ENSBTAG00000006555	ZMYM1	-0.201	0.142	0.161513	0.515199	0
3	110648270	110694255	ENSBTAG00000021948	ZMYM6	-0.313	0.207	0.133614	0.472094	0
3	110694718	110698693	ENSBTAG00000024086	TMEM35B	0.05	0.1	0.617075	0.879151	0
3	110835276	110839536	ENSBTAG00000014235	SMIM12	0.113	0.121	0.350304	0.726093	0
3	112322230	112338096	ENSBTAG00000019555	ZSCAN20	-0.146	0.151	0.333544	0.718774	0
3	112454968	112584264	ENSBTAG00000014079	GIGYF2	-0.12	0.239	0.615668	0.879151	0
3	112794123	112931963	ENSBTAG00000020173	INPP5D	-0.184	0.241	0.445463	0.791767	0
3	112967754	113012711	ENSBTAG00000003928	ATG16L1	0.016	0.223	0.942602	0.98569	0
3	113006855	113074083	ENSBTAG00000054491		0.095	0.058	0.109599	0.430698	0
3	113023696	113054163	ENSBTAG00000021480	SAG	0.099	0.06	0.0891309	0.393847	0
3	113062330	113172640	ENSBTAG00000020616	DGKD	0.54	0.21	0.00932238	0.106629	0
3	113167613	113257470	ENSBTAG00000000149	USP40	-0.413	0.274	0.133614	0.472094	0
3	113516126	113528914	ENSBTAG00000024726	HJURP	0.022	0.14	0.875245	0.970121	0
3	114109766	114114883	ENSBTAG00000053153		-0.453	0.157	0.00373163	0.0560907	0
3	114535147	114633955	ENSBTAG00000013869	SH3BP4	0.03	0.1	0.764177	0.934516	0
3	115044731	115604936	ENSBTAG00000016504	AGAP1	0.149	0.115	0.193601	0.557799	0
3	116025262	116037482	ENSBTAG00000018424	ACKR3	-0.307	0.134	0.0214482	0.177124	0
3	116552174	116565322	ENSBTAG00000005854	COPS8	0.214	0.265	0.419091	0.774542	0
3	116782465	116855219	ENSBTAG00000030190	COL6A3	0.027	0.035	0.440707	0.787892	0
3	116879870	116880307	ENSBTAG00000001538		0.104	0.096	0.271332	0.633529	0
3	117020666	117043357	ENSBTAG00000017624	RAB17	-0.134	0.089	0.133614	0.472094	0
3	117074081	117235735	ENSBTAG00000005354	LRRFIP1	-0.355	0.244	0.133614	0.472094	0
3	117354167	117399773	ENSBTAG00000026114	UBE2F	0.11	0.127	0.38649	0.752219	0
3	117410453	117441217	ENSBTAG00000017826	SCLY	-0.152	0.147	0.317311	0.70242	0
3	117441783	117464352	ENSBTAG00000010164	ESPNL	-0.247	0.093	0.00693395	0.0881582	0
3	117501464	117526261	ENSBTAG00000010176	ILKAP	0.514	0.281	0.0718606	0.354245	0
3	117540909	117547512	ENSBTAG00000052151		-0.191	0.183	0.317311	0.70242	0
3	117558885	117599971	ENSBTAG00000001879	PER2	-0.209	0.124	0.0891309	0.393847	0
3	117639171	117699247	ENSBTAG00000015973	TRAF3IP1	-0.538	0.15	0.000318217	0.00832812	0
3	117716651	117735517	ENSBTAG00000003376	ASB1	-0.385	0.116	0.000966848	0.0204391	0
3	118225398	118462734	ENSBTAG00000017764	HDAC4	-0.084	0.118	0.476465	0.80941	0
3	118884975	118923959	ENSBTAG00000003279	NDUFA10	0.084	0.197	0.670108	0.902694	0
3	119425809	119430912	ENSBTAG00000045948	CSF2RA	0.149	0.122	0.230139	0.597314	0
3	119448835	119463141	ENSBTAG00000053696		-0.044	0.076	0.562589	0.85507	0
3	119480332	119499353	ENSBTAG00000049808		-0.037	0.084	0.659937	0.898162	0
3	119510492	119511556	ENSBTAG00000047839	P2RY8	-0.015	0.104	0.8855	0.973484	0
3	119577914	119585327	ENSBTAG00000054242	AKAP17A	-0.254	0.199	0.193601	0.557799	0
3	119662082	119666681	ENSBTAG00000010910	COPS9	0.074	0.102	0.468452	0.804564	0
3	119863649	119891441	ENSBTAG00000015996	GPC1	-0.176	0.078	0.0214482	0.177124	0
3	119952858	119954650	ENSBTAG00000049766	DUSP28	0.151	0.283	0.593342	0.869042	0
3	119958670	119967450	ENSBTAG00000007215	RNPEPL1	0.263	0.127	0.0357288	0.242894	0
3	119973442	119983832	ENSBTAG00000002809	CAPN10	0.104	0.135	0.4413	0.788053	0
3	120005503	120020505	ENSBTAG00000030193	GPR35	0.007	0.118	0.952952	0.987127	0
3	120329405	120335084	ENSBTAG00000000784	MTERF4	0.172	0.242	0.477084	0.80941	0
3	120335887	120364423	ENSBTAG00000000785	PASK	-0.442	0.147	0.0026998	0.0440685	0
3	120373077	120389112	ENSBTAG00000000789	PPP1R7	0.142	0.179	0.427778	0.779338	0
3	120423895	120482640	ENSBTAG00000004315	HDLBP	0.814	0.276	0.00373163	0.0560907	0
3	120482707	120511035	ENSBTAG00000002608	SEPTIN2	-0.403	0.299	0.193601	0.557799	0
3	120512441	120612106	ENSBTAG00000013110	FARP2	-0.135	0.186	0.467839	0.804282	0
3	120612526	120622330	ENSBTAG00000009676	STK25	0.241	0.184	0.193601	0.557799	0
3	120665994	120709495	ENSBTAG00000013253	THAP4	0.359	0.15	0.0163951	0.152243	0
3	120710007	120725948	ENSBTAG00000015401	ATG4B	0.247	0.19	0.193601	0.557799	0
3	120728099	120736657	ENSBTAG00000015408	DTYMK	0.059	0.108	0.585066	0.865104	0
3	120743885	120760644	ENSBTAG00000009123	ING5	0.269	0.236	0.271332	0.633529	0
3	120765583	120791784	ENSBTAG00000002847	D2HGDH	-0.01	0.143	0.944194	0.985803	0
3	120837823	120848740	ENSBTAG00000011543	PDCD1	-0.022	0.089	0.804908	0.945673	0
4	5106065	5327013	ENSBTAG00000017086	GRB10	-0.284	0.092	0.00193521	0.0343136	0
4	5454469	5459002	ENSBTAG00000001500	FIGNL1	0.16	0.171	0.349273	0.725276	0
4	5505954	5599101	ENSBTAG00000014016	IKZF1	0.156	0.149	0.317311	0.70242	0
4	7205760	7598351	ENSBTAG00000003531	ABCA13	0.116	0.057	0.0455003	0.279604	0
4	7619639	7648114	ENSBTAG00000008428	UPP1	0.065	0.043	0.133614	0.472094	0
4	7937943	8616503	ENSBTAG00000048664	CDK14	0.055	0.103	0.593342	0.869042	0
4	8735637	8740694	ENSBTAG00000027319		0.233	0.14	0.0891309	0.393847	0
4	9247873	9254862	ENSBTAG00000045617	MTERF1	0.233	0.196	0.230139	0.597314	0
4	9333128	9455572	ENSBTAG00000007442	AKAP9	0.083	0.1	0.406539	0.767295	0
4	9459764	9476713	ENSBTAG00000001992	CYP51A1	0.359	0.222	0.109599	0.430698	0
4	9528416	9567814	ENSBTAG00000002750	KRIT1	0.375	0.229	0.109599	0.430698	0
4	9624288	9725826	ENSBTAG00000034936	ANKIB1	0.104	0.171	0.543187	0.847447	0
4	9704065	9704457	ENSBTAG00000048169		-0.133	0.105	0.193601	0.557799	0
4	9764439	9772218	ENSBTAG00000021996	GATAD1	0.145	0.121	0.230139	0.597314	0
4	9789227	9870626	ENSBTAG00000024431	PEX1	0.052	0.282	0.854013	0.963455	0
4	9870503	9877234	ENSBTAG00000018363	RBM48	0.136	0.221	0.538555	0.84381	0
4	9909855	9926242	ENSBTAG00000050705		0.3	0.149	0.0455003	0.279604	0
4	9939646	10188536	ENSBTAG00000044023	CDK6	0.033	0.079	0.675947	0.905017	0
4	10449812	10468917	ENSBTAG00000053050	SAMD9	0.027	0.09	0.764177	0.934516	0
4	10541020	10595196	ENSBTAG00000012456	HEPACAM2	0.002	0.034	0.952952	0.987127	0
4	10600800	10732873	ENSBTAG00000014255	VPS50	0.203	0.212	0.338063	0.720986	0
4	11242533	11247552	ENSBTAG00000000820	GNG11	-0.003	0.057	0.957732	0.987752	0
4	11330484	11345143	ENSBTAG00000003424	BET1	0.002	0.181	0.991223	0.997189	0
4	11776554	11812997	ENSBTAG00000013472	COL1A2	0.021	0.019	0.271332	0.633529	0
4	11886419	11939978	ENSBTAG00000009109	CASD1	0.286	0.134	0.0357288	0.242894	0
4	12063954	12076656	ENSBTAG00000053735	PEG10	0.057	0.059	0.334044	0.718774	0
4	12191129	12534305	ENSBTAG00000024426	PPP1R9A	0.078	0.07	0.271332	0.633529	0
4	12645430	12673193	ENSBTAG00000008361	PON2	-0.277	0.244	0.271332	0.633529	0
4	12881889	12895362	ENSBTAG00000014069	PDK4	0.119	0.085	0.161513	0.515199	0
4	13462646	13692192	ENSBTAG00000003773	SLC25A13	-0.128	0.212	0.545844	0.848443	0
4	14054960	14079935	ENSBTAG00000052508	SEM1	-0.1	0.134	0.455667	0.798078	0
4	14114994	14117046	ENSBTAG00000020685		-0.187	0.088	0.0357288	0.242894	0
4	14476805	14567618	ENSBTAG00000015925	SDHAF3	0.251	0.16	0.109599	0.430698	0
4	15128694	15276513	ENSBTAG00000003222	ASNS	-0.715	0.13	3.79791e-08	3.40076e-06	0
4	15276632	15320627	ENSBTAG00000004995	C1GALT1	-0.091	0.126	0.470294	0.806072	0
4	15634972	15672063	ENSBTAG00000013781	MIOS	-0.31	0.203	0.133614	0.472094	0
4	15692488	15695690	ENSBTAG00000013168	RPA3	-0.077	0.124	0.5346	0.842033	0
4	15734909	15991563	ENSBTAG00000047004	UMAD1	-0.443	0.209	0.0357288	0.242894	0
4	16051521	16156180	ENSBTAG00000008533	GLCCI1	-0.037	0.144	0.797179	0.943489	0
4	16192292	16355628	ENSBTAG00000000799	ICA1	-0.055	0.157	0.726339	0.921411	0
4	16779419	16781333	ENSBTAG00000045937		-0.024	0.106	0.821201	0.951968	0
4	19017935	19018355	ENSBTAG00000038527		-0.006	0.069	0.930672	0.983801	0
4	19041321	19049196	ENSBTAG00000011145	NDUFA4	-0.043	0.102	0.673025	0.903807	0
4	19065677	19077110	ENSBTAG00000011819	PHF14	0.061	0.205	0.765703	0.934581	0
4	19160155	19196937	ENSBTAG00000053922		0.103	0.175	0.555861	0.851659	0
4	20366146	20388726	ENSBTAG00000019750	TMEM106B	0.019	0.123	0.87761	0.971025	0
4	20624426	20703669	ENSBTAG00000009786	SCIN	0.189	0.09	0.0357288	0.242894	0
4	20764660	20766198	ENSBTAG00000002869	ARL4A	-0.186	0.185	0.317311	0.70242	0
4	25090913	25130458	ENSBTAG00000010980	ANKMY2	-0.137	0.249	0.582319	0.863389	0
4	25130690	25193513	ENSBTAG00000014262	BZW2	-0.395	0.182	0.0278069	0.208236	0
4	25245149	25283286	ENSBTAG00000012805	TSPAN13	-0.125	0.143	0.382118	0.750938	0
4	25805796	25855901	ENSBTAG00000007746	AHR	0.026	0.114	0.819646	0.951661	0
4	26324012	26469689	ENSBTAG00000014074	SNX13	0.197	0.127	0.109599	0.430698	0
4	27093041	27667961	ENSBTAG00000003808	HDAC9	0.043	0.117	0.712873	0.91629	0
4	28399526	28410479	ENSBTAG00000006721	POLR1F	0.306	0.186	0.109599	0.430698	0
4	30225647	30305513	ENSBTAG00000014389	SP4	0.066	0.109	0.544515	0.847534	0
4	30324683	30693265	ENSBTAG00000013078	DNAH11	0.107	0.071	0.133614	0.472094	0
4	30692956	30904166	ENSBTAG00000004976	CDCA7L	0.443	0.179	0.0124193	0.127509	0
4	30909069	31143356	ENSBTAG00000015539	RAPGEF5	-0.01	0.074	0.892612	0.975753	0
4	31520444	31527812	ENSBTAG00000051150	TOMM7	0.004	0.121	0.973675	0.992841	0
4	31551687	31554228	ENSBTAG00000053905		0.199	0.109	0.0718606	0.354245	0
4	31570207	31570769	ENSBTAG00000033806		0.027	0.066	0.68254	0.90841	0
4	31618071	31751438	ENSBTAG00000004575	FAM126A	-0.129	0.125	0.317311	0.70242	0
4	31768332	31824070	ENSBTAG00000016010	KLHL7	-0.28	0.208	0.193601	0.557799	0
4	31829701	31843769	ENSBTAG00000016014	NUP42	-0.158	0.168	0.347218	0.724219	0
4	31876899	31903130	ENSBTAG00000000604	GPNMB	-0.037	0.036	0.317311	0.70242	0
4	31917458	31942803	ENSBTAG00000019403	MALSU1	-0.146	0.128	0.271332	0.633529	0
4	31943617	32088119	ENSBTAG00000019406	IGF2BP3	0.039	0.049	0.426032	0.778461	0
4	32116515	32135318	ENSBTAG00000012622	TRA2A	0.19	0.217	0.38103	0.750329	0
4	32217367	32259874	ENSBTAG00000013010	CCDC126	0.093	0.15	0.535258	0.842223	0
4	32287899	32315089	ENSBTAG00000014711	DBF4	-0.077	0.184	0.675947	0.905017	0
4	32315217	32394916	ENSBTAG00000054987	SLC25A40	-0.494	0.182	0.00693395	0.0881582	0
4	32435032	32536675	ENSBTAG00000015666		-0.3	0.111	0.00693395	0.0881582	0
4	32564174	32731459	ENSBTAG00000021313	RUNDC3B	-0.009	0.061	0.882343	0.972229	0
4	32880212	32982260	ENSBTAG00000005997		-0.615	0.122	5.73303e-07	3.78259e-05	0
4	33006669	33080056	ENSBTAG00000005653	ABCB4	-0.136	0.067	0.0455003	0.279604	0
4	33083035	33144192	ENSBTAG00000021535	CROT	0.006	0.087	0.94499	0.985803	0
4	33226967	33248624	ENSBTAG00000038283	TMEM243	-0.576	0.129	6.79535e-06	0.0003477	0
4	33249637	33286857	ENSBTAG00000020878	DMTF1	-0.025	0.149	0.866583	0.966159	0
4	33257813	33258782	ENSBTAG00000053479		-0.024	0.07	0.731598	0.923524	0
4	33387397	33388681	ENSBTAG00000019276		0	0.091	1	1	0
4	33398732	33619877	ENSBTAG00000004023	ELAPOR2	0.061	0.099	0.537895	0.84381	0
4	38929386	39010999	ENSBTAG00000017664	HGF	0.145	0.081	0.0718606	0.354245	0
4	39939436	40145312	ENSBTAG00000006138	SEMA3C	0.072	0.067	0.271332	0.633529	0
4	40380301	40443336	ENSBTAG00000017866	CD36	0.057	0.038	0.133614	0.472094	0
4	40956253	41062151	ENSBTAG00000002714	GNAI1	-0.183	0.1	0.0718606	0.354245	0
4	43148370	43148895	ENSBTAG00000022498		0.009	0.046	0.84461	0.95828	0
4	43312172	43449891	ENSBTAG00000005102	PHTF2	0.06	0.13	0.644081	0.893065	0
4	43450254	43454105	ENSBTAG00000033290	TMEM60	-0.105	0.14	0.453255	0.796468	0
4	43464283	43548241	ENSBTAG00000015753	RSBN1L	0.049	0.211	0.816538	0.949988	0
4	43598679	43690863	ENSBTAG00000003825	PTPN12	0.162	0.148	0.271332	0.633529	0
4	43815426	43913447	ENSBTAG00000018430	GSAP	0.255	0.14	0.0718606	0.354245	0
4	43916446	44057818	ENSBTAG00000009341	CCDC146	0.244	0.087	0.00511026	0.0707089	0
4	44000211	44004848	ENSBTAG00000009717	FGL2	0.209	0.082	0.0124193	0.127509	0
4	44057955	44133423	ENSBTAG00000014879	FAM185A	0.166	0.126	0.193601	0.557799	0
4	44363508	44428499	ENSBTAG00000014161	ARMC10	0.135	0.25	0.589197	0.866617	0
4	44427825	44517650	ENSBTAG00000014171	NAPEPLD	-0.212	0.149	0.161513	0.515199	0
4	44516585	44531440	ENSBTAG00000006876	PMPCB	-0.034	0.258	0.894984	0.975865	0
4	44531524	44565511	ENSBTAG00000003784	DNAJC2	0.022	0.195	0.910031	0.979997	0
4	44569083	44582371	ENSBTAG00000046712	PSMC2	0.137	0.235	0.559893	0.853975	0
4	45330008	45418109	ENSBTAG00000040058	ORC5	0.206	0.193	0.271332	0.633529	0
4	46202241	46292635	ENSBTAG00000009207	KMT2E	-0.067	0.136	0.622013	0.881577	0
4	46296970	46536298	ENSBTAG00000002175	SRPK2	-0.161	0.142	0.271332	0.633529	0
4	46337363	46340362	ENSBTAG00000047286		-0.033	0.09	0.713619	0.916685	0
4	46586617	46640231	ENSBTAG00000007743	PUS7	0.214	0.198	0.271332	0.633529	0
4	46646922	46670543	ENSBTAG00000008302	RINT1	-0.157	0.264	0.551843	0.850493	0
4	46703819	46757682	ENSBTAG00000002037	ATXN7L1	-0.23	0.132	0.0891309	0.393847	0
4	46833351	46955175	ENSBTAG00000049733	ATXN7L1	-0.166	0.178	0.35082	0.726562	0
4	47151949	47180223	ENSBTAG00000019794	SYPL1	-0.059	0.196	0.763414	0.934404	0
4	47321231	47361906	ENSBTAG00000015509	NAMPT	0.252	0.197	0.193601	0.557799	0
4	47813589	47814290	ENSBTAG00000053836		0.013	0.116	0.910823	0.980261	0
4	47988419	48021445	ENSBTAG00000020848	PIK3CG	0.246	0.141	0.0891309	0.393847	0
4	48154065	48255759	ENSBTAG00000014958	PRKAR2B	0.131	0.142	0.356007	0.730301	0
4	48265379	48296503	ENSBTAG00000005524	HBP1	0.181	0.255	0.477704	0.810023	0
4	48291963	48507532	ENSBTAG00000005526	COG5	0.179	0.225	0.426032	0.778461	0
4	48538065	48572713	ENSBTAG00000052002		0.395	0.162	0.0163951	0.152243	0
4	48572836	48643612	ENSBTAG00000021849	DUS4L	-0.2	0.192	0.317311	0.70242	0
4	48759142	48773761	ENSBTAG00000018348	CBLL1	0.285	0.191	0.133614	0.472094	0
4	48953177	48979994	ENSBTAG00000001908	DLD	0.013	0.201	0.948174	0.986579	0
4	48985684	49062759	ENSBTAG00000011412	LAMB1	-0.162	0.064	0.0124193	0.127509	0
4	49248702	49563305	ENSBTAG00000006732	NRCAM	-0.034	0.054	0.528695	0.838951	0
4	49589564	49629500	ENSBTAG00000024387	PNPLA8	-0.188	0.176	0.271332	0.633529	0
4	49750583	49787423	ENSBTAG00000033197	EPDR1	0.003	0.091	0.973675	0.992841	0
4	49987458	50048654	ENSBTAG00000038795	STARD3NL	-0.232	0.262	0.376157	0.745534	0
4	50056455	50082481	ENSBTAG00000035945		0.036	0.076	0.6355	0.887646	0
4	50099256	50100893	ENSBTAG00000053502		0.018	0.056	0.74821	0.928578	0
4	50142139	50162526	ENSBTAG00000036154	TARP	0.031	0.07	0.657766	0.897448	0
4	50399810	50651437	ENSBTAG00000021469	CTTNBP2	-0.182	0.094	0.0574331	0.316615	0
4	51002521	51078365	ENSBTAG00000000169	ASZ1	-0.077	0.032	0.0163951	0.152243	0
4	51165809	51456320	ENSBTAG00000010756	ST7	-0.171	0.107	0.109599	0.430698	0
4	51491712	51546693	ENSBTAG00000004072	CAPZA2	-0.248	0.19	0.193601	0.557799	0
4	51622340	51735652	ENSBTAG00000006161	MET	0.028	0.096	0.770287	0.936074	0
4	51865755	51901396	ENSBTAG00000017869	CAV1	-0.117	0.051	0.0214482	0.177124	0
4	52169888	52225054	ENSBTAG00000021204	TES	0.36	0.156	0.0214482	0.177124	0
4	52282339	52499410	ENSBTAG00000014228	TFEC	0.107	0.084	0.193601	0.557799	0
4	53442844	53541143	ENSBTAG00000021543	MDFIC	0.247	0.156	0.109599	0.430698	0
4	54172627	54173103	ENSBTAG00000054178	UBE2I	-0.286	0.17	0.0891309	0.393847	0
4	55292088	55294458	ENSBTAG00000051506		0.208	0.195	0.271332	0.633529	0
4	55467396	55544715	ENSBTAG00000007608	BMT2	-0.212	0.166	0.193601	0.557799	0
4	55560579	55618384	ENSBTAG00000021967	TMEM168	0.143	0.166	0.389238	0.752543	0
4	55863961	55887646	ENSBTAG00000010549	IFRD1	-0.032	0.186	0.863438	0.965589	0
4	55985141	56120652	ENSBTAG00000013050	ZNF277	0.171	0.102	0.0891309	0.393847	0
4	56119633	56598768	ENSBTAG00000021182	DOCK4	0.079	0.079	0.317311	0.70242	0
4	56808963	57722182	ENSBTAG00000004398	IMMP2L	0.001	0.128	0.993617	0.997596	0
4	58359235	58359870	ENSBTAG00000020620	RGS2	0.023	0.06	0.70172	0.91406	0
4	59583232	59586115	ENSBTAG00000046588	DNAJB9	-0.17	0.165	0.317311	0.70242	0
4	59588215	59594296	ENSBTAG00000021869	THAP5	0.082	0.152	0.589887	0.867428	0
4	59642395	59643306	ENSBTAG00000002154	GPR141	-0.091	0.09	0.317311	0.70242	0
4	59867412	60450510	ENSBTAG00000003490	ELMO1	0.126	0.316	0.689893	0.911081	0
4	60544208	60732292	ENSBTAG00000018119	AOAH	0.375	0.117	0.00137428	0.0266686	0
4	60772368	60825953	ENSBTAG00000009218	ANLN	-0.023	0.116	0.843045	0.957891	0
4	60949038	61140520	ENSBTAG00000019065	EEPD1	-0.144	0.121	0.230139	0.597314	0
4	61204174	61302729	ENSBTAG00000001182	SEPTIN7	-0.186	0.182	0.317311	0.70242	0
4	61402841	61438886	ENSBTAG00000015105	HERPUD2	-0.098	0.297	0.7414	0.925163	0
4	61976304	62068881	ENSBTAG00000005785	DPY19L1	-0.117	0.143	0.413357	0.77042	0
4	63255358	63708251	ENSBTAG00000006528	BBS9	-0.269	0.138	0.0574331	0.316615	0
4	63733826	63746286	ENSBTAG00000032598	RP9	-0.24	0.146	0.109599	0.430698	0
4	63764945	63768770	ENSBTAG00000052846		0.034	0.079	0.667196	0.901495	0
4	63788270	63807500	ENSBTAG00000016709	NT5C3A	-0.19	0.116	0.109599	0.430698	0
4	63812248	63854573	ENSBTAG00000016707	FKBP9	-0.08	0.085	0.346705	0.724219	0
4	63912710	63925721	ENSBTAG00000003115	KBTBD2	0.227	0.163	0.161513	0.515199	0
4	63956366	64010228	ENSBTAG00000003114	AVL9	0.01	0.124	0.935442	0.984527	0
4	64014862	64018569	ENSBTAG00000002332	LSM5	-0.052	0.123	0.672295	0.903796	0
4	65266775	65377107	ENSBTAG00000020247	ADCYAP1R1	0.151	0.115	0.193601	0.557799	0
4	65704797	65758270	ENSBTAG00000018972	GARS1	0.158	0.275	0.565291	0.856477	0
4	65785076	65805893	ENSBTAG00000051818		0.201	0.087	0.0214482	0.177124	0
4	65806682	65816128	ENSBTAG00000010597	GGCT	0.061	0.133	0.646234	0.893678	0
4	65822126	65911847	ENSBTAG00000038235	NOD1	-0.074	0.145	0.610051	0.877625	0
4	65961977	66053326	ENSBTAG00000000260	ZNRF2	0.46	0.305	0.133614	0.472094	0
4	66186175	66214450	ENSBTAG00000052317	MTURN	0.095	0.094	0.317311	0.70242	0
4	66266959	66328519	ENSBTAG00000000521	PLEKHA8	-0.265	0.144	0.0718606	0.354245	0
4	66328677	66340716	ENSBTAG00000007870	FKBP14	-0.37	0.091	4.1315e-05	0.00163383	0
4	66355254	66421169	ENSBTAG00000016223	SCRN1	0.091	0.098	0.352889	0.72856	0
4	66634935	66970909	ENSBTAG00000020931	CHN2	-0.259	0.138	0.0574331	0.316615	0
4	67314290	67752296	ENSBTAG00000018909	CREB5	0.011	0.082	0.893403	0.975753	0
4	67992971	68321145	ENSBTAG00000019024	JAZF1	0.224	0.165	0.161513	0.515199	0
4	68323940	68407181	ENSBTAG00000019020	TAX1BP1	0.047	0.197	0.811106	0.947714	0
4	68473794	68614954	ENSBTAG00000001036	HIBADH	0.05	0.222	0.821979	0.952165	0
4	69125496	69297030	ENSBTAG00000005650	SKAP2	-0.083	0.102	0.415645	0.772616	0
4	69587812	69655430	ENSBTAG00000001822	SNX10	-0.121	0.097	0.230139	0.597314	0
4	69722997	69734069	ENSBTAG00000049437	CBX3	-0.016	0.168	0.924315	0.982883	0
4	69735135	69744610	ENSBTAG00000005726	HNRNPA2B1	0.264	0.238	0.271332	0.633529	0
4	69748359	69782790	ENSBTAG00000004136	NFE2L3	-0.023	0.172	0.893403	0.975753	0
4	70735436	70738238	ENSBTAG00000022613	CYCS	-0.305	0.129	0.0163951	0.152243	0
4	70844945	71041101	ENSBTAG00000019342	OSBPL3	-0.186	0.125	0.133614	0.472094	0
4	71063232	71063807	ENSBTAG00000046586		0.049	0.139	0.724088	0.920699	0
4	71088326	71192446	ENSBTAG00000015326	GSDME	-0.031	0.073	0.670837	0.902803	0
4	71173805	71303589	ENSBTAG00000015303	MPP6	-0.11	0.107	0.317311	0.70242	0
4	72319442	72342353	ENSBTAG00000010390	SRI	0.31	0.163	0.0574331	0.316615	0
4	72378038	72407341	ENSBTAG00000002340	STEAP4	0.019	0.03	0.526734	0.837748	0
4	74405139	74430946	ENSBTAG00000003506	STEAP2	-0.435	0.089	9.58367e-07	5.91827e-05	0
4	74533033	74559891	ENSBTAG00000032166	GTPBP10	0.111	0.163	0.495871	0.822543	0
4	74573944	74587244	ENSBTAG00000013226	HUS1	0.341	0.216	0.109599	0.430698	0
4	74779686	74996283	ENSBTAG00000009655	TNS3	0.019	0.097	0.84461	0.95828	0
4	76131287	76136846	ENSBTAG00000046768	IGFBP1	0.034	0.031	0.271332	0.633529	0
4	76154665	76157434	ENSBTAG00000053893		-0.008	0.032	0.802587	0.944806	0
4	76444976	76493685	ENSBTAG00000020704	RAMP3	-0.111	0.052	0.0357288	0.242894	0
4	76522744	76531904	ENSBTAG00000010504	TBRG4	-0.274	0.179	0.133614	0.472094	0
4	76537712	76548692	ENSBTAG00000051248		-0.033	0.095	0.728591	0.922495	0
4	76550183	76603468	ENSBTAG00000008090	CCM2	-0.118	0.195	0.545179	0.847831	0
4	76611350	76614443	ENSBTAG00000052466		0.055	0.152	0.717352	0.918844	0
4	76617184	76633185	ENSBTAG00000006377	MYO1G	-0.11	0.226	0.626258	0.8833	0
4	76665960	76669082	ENSBTAG00000052945	PURB	0.086	0.131	0.511824	0.829477	0
4	76669524	76669579	ENSBTAG00000046529	bta-mir-4657	0.026	0.076	0.732351	0.923524	0
4	76689344	76701169	ENSBTAG00000016975	H2AZ2	-0.11	0.122	0.367057	0.737763	0
4	76709520	76713230	ENSBTAG00000012003	PPIA	-0.054	0.141	0.70172	0.91406	0
4	76730454	76748161	ENSBTAG00000011997	ZMIZ2	0.019	0.154	0.902107	0.97751	0
4	76758582	76844759	ENSBTAG00000006029	OGDH	-0.199	0.235	0.396995	0.759227	0
4	76859613	76862453	ENSBTAG00000010612	TMED4	-0.126	0.234	0.590577	0.867832	0
4	76865589	76874946	ENSBTAG00000010602	DDX56	-0.213	0.199	0.271332	0.633529	0
4	76917098	76988105	ENSBTAG00000006325	NUDCD3	-0.284	0.205	0.161513	0.515199	0
4	77120960	77129830	ENSBTAG00000000274	YKT6	0.063	0.293	0.829767	0.954309	0
4	77190290	77200482	ENSBTAG00000012241	POLD2	0.036	0.144	0.802587	0.944806	0
4	77200840	77209981	ENSBTAG00000012237	AEBP1	0.108	0.096	0.271332	0.633529	0
4	77228350	77236566	ENSBTAG00000007796	POLM	-0.049	0.138	0.72259	0.920567	0
4	77284046	77335575	ENSBTAG00000013414	BLVRA	-0.053	0.165	0.74821	0.928578	0
4	77371216	77465906	ENSBTAG00000012968	COA1	0.418	0.152	0.00511026	0.0707089	0
4	77478669	77515252	ENSBTAG00000008143	STK17A	0.135	0.211	0.522173	0.834199	0
4	77539351	77804239	ENSBTAG00000021216	HECW1	0.035	0.066	0.596112	0.870861	0
4	78121755	78126851	ENSBTAG00000000991	MRPL32	-1.1	0.211	1.99289e-07	1.47827e-05	0
4	78127061	78137712	ENSBTAG00000000990	PSMA2	-0.818	0.143	1.19807e-08	1.28368e-06	0
4	78136885	78147222	ENSBTAG00000009472	C4H7orf25	0.042	0.233	0.857153	0.963547	0
4	80929262	80931409	ENSBTAG00000018715	MPLKIP	0.188	0.187	0.317311	0.70242	0
4	80952446	81075991	ENSBTAG00000001528	CDK13	-0.126	0.194	0.516338	0.831768	0
4	81187581	81244481	ENSBTAG00000006661	RALA	0.021	0.227	0.925904	0.982999	0
4	81286079	81291402	ENSBTAG00000001892	YAE1	0.092	0.181	0.611453	0.877625	0
4	81370877	81759991	ENSBTAG00000013648	POU6F2	0.042	0.065	0.518279	0.832434	0
4	81966837	82156974	ENSBTAG00000007305	VPS41	0.247	0.265	0.351337	0.727151	0
4	82295679	82507550	ENSBTAG00000031967	AMPH	-0.13	0.08	0.109599	0.430698	0
4	82533901	82573389	ENSBTAG00000000144		-0.007	0.109	0.94897	0.98708	0
4	82638575	82641187	ENSBTAG00000053474		-0.208	0.047	1.08251e-05	0.000530091	0
4	82692176	82710398	ENSBTAG00000055254		-0.123	0.064	0.0574331	0.316615	0
4	82720173	82744666	ENSBTAG00000002859		0.174	0.076	0.0214482	0.177124	0
4	82745643	82745786	ENSBTAG00000049399		0.019	0.057	0.739134	0.92436	0
4	82786342	82793813	ENSBTAG00000012649	LSM8	-0.277	0.158	0.0718606	0.354245	0
4	85453414	85480394	ENSBTAG00000016332	ING3	0.131	0.236	0.578895	0.862699	0
4	85491227	85814161	ENSBTAG00000002938	CPED1	0.094	0.068	0.161513	0.515199	0
4	85865619	85918137	ENSBTAG00000007976	FAM3C	0.094	0.165	0.568678	0.857875	0
4	86516905	86594679	ENSBTAG00000012128	AASS	0.194	0.118	0.109599	0.430698	0
4	86734600	87314496	ENSBTAG00000005110	CADPS2	0.064	0.105	0.541862	0.846874	0
4	87871092	87887305	ENSBTAG00000009334	NDUFA5	0.352	0.151	0.0214482	0.177124	0
4	87988365	88069929	ENSBTAG00000004643	WASL	-0.241	0.201	0.230139	0.597314	0
4	89093139	89183193	ENSBTAG00000013180	POT1	0.126	0.179	0.481433	0.812062	0
4	91589029	91638634	ENSBTAG00000020004	ZNF800	0.054	0.168	0.74821	0.928578	0
4	91811881	91815933	ENSBTAG00000003102	GCC1	0.025	0.223	0.910823	0.980261	0
4	91819098	91822148	ENSBTAG00000009366	ARF5	-0.037	0.132	0.779478	0.938307	0
4	91873756	92296106	ENSBTAG00000010692	SND1	-0.225	0.244	0.356529	0.730301	0
4	92499373	92531680	ENSBTAG00000017001	RBM28	-0.713	0.289	0.0124193	0.127509	0
4	92569423	92586808	ENSBTAG00000000296	IMPDH1	0.156	0.181	0.388688	0.752523	0
4	92719265	92744873	ENSBTAG00000016481	CALU	0.147	0.217	0.498406	0.823733	0
4	92763331	92792188	ENSBTAG00000011002	CCDC136	0.103	0.054	0.0574331	0.316615	0
4	92828149	92831704	ENSBTAG00000007572	ATP6V1F	-0.056	0.114	0.623426	0.882289	0
4	92843936	92873142	ENSBTAG00000003449	KCP	0.037	0.075	0.622013	0.881577	0
4	92892127	92905297	ENSBTAG00000004989	IRF5	-0.427	0.25	0.0891309	0.393847	0
4	92909747	92987982	ENSBTAG00000004992	TNPO3	-1.5	0.419	0.000318217	0.00832812	0
4	92988123	92988191	ENSBTAG00000044868	bta-mir-1843	0.082	0.12	0.494607	0.822006	0
4	93068851	93088762	ENSBTAG00000007253	TSPAN33	-0.07	0.107	0.513112	0.829769	0
[truncated: 10,538 more rows]
