# Supplementary material for: Bridging GWAS to genes: an integrative multi-omics approach using cattle data
Source: Research Square preprint supplement (doi:10.21203/rs.3.rs-7693421/v1), 2025-10-14
Supplement: Supplementary file 3 [file 7593eac254ecc795a4dbe901.xlsx]

## Sheet: Additionalfile1
Additional file 1. GSOR analyses using mammary RNAseq data (Correlation between mammary gene expression and local GEBV for milk lactose percentage)
Chr	Start(bp)	End(bp)	Ensembl_ID	GeneName	beta	SE	Pvalue	FDR(BH)	OverlapWithGWAS(loci)
1	882081	1002223	ENSBTAG00000020035	RCAN1	-0.27	0.115	0.0214482	0.20425	0
1	904168	904713	ENSBTAG00000005540	CBX3	-0.229	0.156	0.133614	0.501085	0
1	1102887	1118312	ENSBTAG00000011528	SMIM11A	-0.091	0.149	0.5412	0.855751	0
1	1390803	1455219	ENSBTAG00000012594	MRPS6	-0.29	0.143	0.0455003	0.304255	0
1	1643628	1651039	ENSBTAG00000018278	ATP5PO	-0.125	0.134	0.35082	0.749081	0
1	1665339	1908788	ENSBTAG00000021997	ITSN1	0.074	0.132	0.574798	0.869722	0
1	1909498	1943914	ENSBTAG00000008490	CRYZL1	-0.202	0.21	0.33605	0.740677	0
1	1942815	1954023	ENSBTAG00000035175	DONSON	-0.077	0.195	0.692843	0.915177	0
1	1954230	1985068	ENSBTAG00000008482	SON	0.109	0.172	0.526081	0.847887	0
1	1985522	2012383	ENSBTAG00000009188	GART	0.135	0.136	0.32071	0.732461	0
1	2028900	2030042	ENSBTAG00000009187	DNAJC28	0.101	0.122	0.40767	0.785245	0
1	2046733	2083566	ENSBTAG00000001258	TMEM50B	0.036	0.155	0.816538	0.956569	0
1	2098968	2124278	ENSBTAG00000012899	IFNGR2	-0.169	0.127	0.193601	0.577546	0
1	2189895	2218344	ENSBTAG00000021819	IFNAR1	0.291	0.183	0.109599	0.460088	0
1	2242523	2314142	ENSBTAG00000019404	IL10RB	-0.743	0.257	0.00373163	0.0724824	0
1	2315596	2350090	ENSBTAG00000015212	IFNAR2	0.151	0.182	0.406539	0.7843	0
1	2786812	2819637	ENSBTAG00000003064	PAXBP1	0.078	0.188	0.678142	0.909616	0
1	2827691	2916599	ENSBTAG00000003063	SYNJ1	0.463	0.183	0.0124193	0.15137	0
1	2924656	2936276	ENSBTAG00000003059	CFAP298	-0.224	0.202	0.271332	0.658135	0
1	2978428	3080528	ENSBTAG00000017310	EVA1C	0.191	0.101	0.0574331	0.341833	0
1	3103263	3180340	ENSBTAG00000012412	URB1	0.229	0.144	0.109599	0.460088	0
1	3501645	3629427	ENSBTAG00000020762	HUNK	0.007	0.058	0.903691	0.980013	0
1	3760509	3822150	ENSBTAG00000018855	SCAF4	0.075	0.13	0.563939	0.864453	0
1	3824601	3833406	ENSBTAG00000018854	SOD1	-0.306	0.092	0.000966848	0.0273241	0
1	4192104	4358253	ENSBTAG00000017839	TIAM1	0.178	0.089	0.0455003	0.304255	0
1	5770225	5772218	ENSBTAG00000039820	CLDN8	0.302	0.083	0.000318217	0.0118359	0
1	6815185	6858058	ENSBTAG00000004139	BACH1	0.029	0.16	0.856368	0.966286	0
1	7114205	7127950	ENSBTAG00000014233	CCT8	0.137	0.144	0.341604	0.744207	1
1	7129414	7155271	ENSBTAG00000020122	USP16	0.036	0.15	0.81033	0.954932	0
1	7167841	7170830	ENSBTAG00000020121	RWDD2B	-0.55	0.161	0.000673859	0.0207708	0
1	7183913	7240822	ENSBTAG00000000201	LTN1	-0.03	0.11	0.784853	0.947258	0
1	7259998	7280970	ENSBTAG00000001412	N6AMT1	-0.1	0.134	0.455667	0.815086	0
1	9440973	9491324	ENSBTAG00000000648	ADAMTS5	-0.101	0.068	0.133614	0.501085	0
1	9583345	9592271	ENSBTAG00000000706	ADAMTS1	-0.1	0.076	0.193601	0.577546	0
1	9868852	10011696	ENSBTAG00000050914	CYYR1	-0.359	0.134	0.00693395	0.103603	0
1	10231296	10543984	ENSBTAG00000017753	APP	0.024	0.111	0.828988	0.957463	0
1	10656634	10691694	ENSBTAG00000019043	GABPA	0.02	0.159	0.899732	0.979965	0
1	10690694	10698960	ENSBTAG00000000605	ATP5PF	-0.152	0.136	0.271332	0.658135	0
1	10702387	10787934	ENSBTAG00000000603	JAM2	0.11	0.125	0.378859	0.767439	0
1	10823242	10849340	ENSBTAG00000019542	MRPL39	-0.151	0.2	0.450249	0.811802	0
1	15324270	15556567	ENSBTAG00000003301	NCAM2	0.06	0.037	0.109599	0.460088	0
1	18567977	18710975	ENSBTAG00000000597	TMPRSS15	-0.036	0.029	0.230139	0.617591	0
1	18712589	18736860	ENSBTAG00000000588	CHODL	-0.002	0.028	0.943398	0.989403	0
1	19227894	19256713	ENSBTAG00000001395	C1H21orf91	0.007	0.119	0.952952	0.992488	0
1	19417655	19437170	ENSBTAG00000018704	BTG3	-0.112	0.098	0.271332	0.658135	0
1	19437777	19502580	ENSBTAG00000004869	CXADR	-0.012	0.11	0.913202	0.982319	0
1	21167188	21328190	ENSBTAG00000019314	USP25	0.084	0.147	0.568	0.866552	0
1	22189815	22193285	ENSBTAG00000047293	NRIP1	0.067	0.084	0.42487	0.794004	0
1	22617489	22675629	ENSBTAG00000002623	SAMSN1	0.025	0.101	0.804134	0.953864	0
1	22783876	22794051	ENSBTAG00000012908	HSPA13	0.041	0.093	0.659213	0.905951	0
1	22948185	22967236	ENSBTAG00000034347	RBM11	0.06	0.087	0.490194	0.833357	0
1	24870588	25065331	ENSBTAG00000010462	ROBO2	-0.11	0.082	0.193601	0.577546	0
1	26116520	26265576	ENSBTAG00000009851	ROBO1	-0.003	0.097	0.97527	0.99571	0
1	29107326	29419066	ENSBTAG00000036262	GBE1	-0.087	0.201	0.665015	0.906919	0
1	33714841	34095244	ENSBTAG00000009219	CADM2	0.014	0.057	0.805682	0.953864	0
1	35036368	35123427	ENSBTAG00000026156	VGLL3	-0.08	0.085	0.346705	0.746447	0
1	35381297	35415198	ENSBTAG00000007939	CHMP2B	-0.159	0.137	0.230139	0.617591	0
1	36058732	36063724	ENSBTAG00000046959	CGGBP1	-0.351	0.138	0.0124193	0.15137	0
1	36063528	36147146	ENSBTAG00000023675	ZNF654	-0.235	0.109	0.0278069	0.233704	0
1	36156437	36162573	ENSBTAG00000007970	C1H3orf38	-0.091	0.117	0.436569	0.801665	0
1	37110684	37519280	ENSBTAG00000006811	EPHA3	0.103	0.034	0.0026998	0.0575565	0
1	38203313	38267163	ENSBTAG00000023652	PROS1	-0.157	0.095	0.0891309	0.421769	0
1	38275588	38352554	ENSBTAG00000005155	ARL13B	0.014	0.112	0.900524	0.979965	0
1	38315772	38331093	ENSBTAG00000005162	STX19	-0.005	0.083	0.952156	0.992488	0
1	38360629	38420853	ENSBTAG00000015728	NSUN3	-0.03	0.123	0.807231	0.954496	0
1	41409771	41994030	ENSBTAG00000044111	EPHA6	-0.057	0.048	0.230139	0.617591	0
1	42010599	42049950	ENSBTAG00000010091	ARL6	-0.221	0.154	0.161513	0.539421	0
1	42070368	42196081	ENSBTAG00000047147	CRYBG3	0.114	0.105	0.271332	0.658135	0
1	42194819	42230806	ENSBTAG00000015546	RIOX2	0.331	0.208	0.109599	0.460088	0
1	42822730	42830190	ENSBTAG00000020996	CLDND1	0.196	0.178	0.271332	0.658135	0
1	42888156	42901415	ENSBTAG00000004124	CPOX	-0.168	0.155	0.271332	0.658135	0
1	43047976	43111603	ENSBTAG00000004471	ST3GAL6	0.043	0.105	0.681806	0.910936	0
1	43112237	43195312	ENSBTAG00000014889	DCBLD2	-0.101	0.136	0.457482	0.816184	0
1	43902264	44073696	ENSBTAG00000013662	COL8A1	0.001	0.026	0.969688	0.994891	0
1	44086074	44481342	ENSBTAG00000013663	CMSS1	0.21	0.1	0.0357288	0.268394	0
1	44096867	44402309	ENSBTAG00000013664	FILIP1L	0.102	0.094	0.271332	0.658135	0
1	44554751	44611092	ENSBTAG00000015010	TBC1D23	-0.015	0.147	0.918757	0.984	0
1	44617553	44637448	ENSBTAG00000004833	NIT2	0.025	0.269	0.925904	0.984814	0
1	44650783	44687949	ENSBTAG00000014302	TOMM70	-0.052	0.169	0.758082	0.938933	0
1	44688566	44729118	ENSBTAG00000034442	LNP1	-0.11	0.107	0.317311	0.726324	0
1	44948235	45061338	ENSBTAG00000004459	TMEM45A	-0.032	0.053	0.545844	0.858436	0
1	45155599	45188354	ENSBTAG00000016363	TFG	-0.029	0.205	0.88787	0.97539	0
1	45743519	45816098	ENSBTAG00000015662	IMPG2	-0.226	0.131	0.0891309	0.421769	0
1	45816823	45988234	ENSBTAG00000016932	SENP7	-0.017	0.098	0.862651	0.968281	0
1	45988289	45992514	ENSBTAG00000024027	TRMT10C	0.12	0.116	0.317311	0.726324	0
1	46001965	46016856	ENSBTAG00000015069	PCNP	0.125	0.139	0.368653	0.762228	0
1	46028911	46058876	ENSBTAG00000013460	ZBTB11	0.152	0.162	0.348244	0.746447	0
1	46061453	46066949	ENSBTAG00000013461	RPL24	0.199	0.117	0.0891309	0.421769	0
1	46077322	46098614	ENSBTAG00000013464	CEP97	-0.099	0.135	0.463558	0.820209	0
1	46114976	46166455	ENSBTAG00000013465	NXPE3	-0.116	0.073	0.109599	0.460088	0
1	46190242	46201247	ENSBTAG00000010987	NFKBIZ	-0.3	0.155	0.0574331	0.341833	0
1	49930775	50160291	ENSBTAG00000000088	ALCAM	-0.368	0.116	0.00137428	0.0356293	0
1	50258002	50481552	ENSBTAG00000013057	CBLB	-0.238	0.126	0.0574331	0.341833	0
1	52133128	52430797	ENSBTAG00000006893	BBX	0.078	0.145	0.590577	0.87705	0
1	52712128	52777176	ENSBTAG00000003585	CD47	-0.187	0.227	0.40994	0.786768	0
1	52879903	52953508	ENSBTAG00000005787	IFT57	-0.191	0.12	0.109599	0.460088	0
1	53068463	53110905	ENSBTAG00000018397	HHLA2	-0.048	0.043	0.271332	0.658135	0
1	53314658	53338782	ENSBTAG00000017140	CIP2A	0.149	0.089	0.0891309	0.421769	0
1	53353203	53467047	ENSBTAG00000006158	DZIP3	0.135	0.111	0.230139	0.617591	0
1	53578753	53626469	ENSBTAG00000049108	TRAT1	0.01	0.069	0.884711	0.974281	0
1	55893616	56089185	ENSBTAG00000013769	NECTIN3	0.169	0.098	0.0891309	0.421769	0
1	56306180	56403972	ENSBTAG00000014441	CD96	-0.067	0.091	0.461731	0.818869	0
1	56342926	56343579	ENSBTAG00000046637	ZBED2	-0.062	0.042	0.133614	0.501085	0
1	56425478	56476144	ENSBTAG00000012646	PLCXD2	0.059	0.174	0.73461	0.932029	0
1	56486571	56727153	ENSBTAG00000001209	PHLDB2	-0.014	0.116	0.903691	0.980013	0
1	56737576	56750712	ENSBTAG00000004601	ABHD10	-0.029	0.184	0.874457	0.971028	0
1	56882970	56918320	ENSBTAG00000016554	C1H3orf52	-0.008	0.028	0.774878	0.943219	0
1	57126575	57147988	ENSBTAG00000033319	CD200	0.076	0.061	0.230139	0.617591	0
1	57309120	57343709	ENSBTAG00000009084	ATG3	-0.404	0.214	0.0574331	0.341833	0
1	57343853	57364455	ENSBTAG00000009085	SLC35A5	-0.006	0.203	0.976067	0.99571	0
1	57364375	57478155	ENSBTAG00000010793	CCDC80	0.012	0.091	0.894984	0.9782	0
1	57639751	57681112	ENSBTAG00000001235	CD200R1L	0.083	0.078	0.271332	0.658135	0
1	57707956	57727875	ENSBTAG00000006534	GTPBP8	-0.08	0.111	0.47091	0.824867	0
1	57725471	57740983	ENSBTAG00000005723	NEPRO	-0.055	0.13	0.672295	0.907727	0
1	57945013	58023212	ENSBTAG00000013909	BOC	0.018	0.075	0.81033	0.954932	0
1	58141829	58199879	ENSBTAG00000013937	SPICE1	0.443	0.195	0.0214482	0.20425	0
1	58218879	58326309	ENSBTAG00000013292	SIDT1	0.236	0.087	0.00693395	0.103603	0
1	58345399	58392043	ENSBTAG00000021000	USF3	-0.087	0.139	0.531315	0.849501	0
1	58402278	58433748	ENSBTAG00000007784	NAA50	-0.051	0.151	0.735363	0.932308	0
1	58434456	58495220	ENSBTAG00000002703	ATP6V1A	-0.007	0.13	0.956935	0.992795	0
1	58518934	58618308	ENSBTAG00000004971	GRAMD1C	-0.033	0.08	0.679607	0.910582	0
1	58619102	58629385	ENSBTAG00000004974	ZDHHC23	0.016	0.143	0.910823	0.981994	0
1	58637237	58735117	ENSBTAG00000004975	CCDC191	-0.045	0.124	0.716605	0.925291	0
1	58735307	58761901	ENSBTAG00000004977	QTRT2	-0.218	0.148	0.133614	0.501085	0
1	58926907	58945271	ENSBTAG00000011921	TIGIT	0.051	0.059	0.387588	0.772424	0
1	60476794	60798351	ENSBTAG00000049383	LSAMP	0.054	0.073	0.4593	0.817283	0
1	64019141	64049977	ENSBTAG00000001390	B4GALT4	-0.153	0.121	0.193601	0.577546	0
1	64083127	64203306	ENSBTAG00000000210	ARHGAP31	0.161	0.146	0.271332	0.658135	0
1	64211525	64240562	ENSBTAG00000000213	TMEM39A	0.147	0.169	0.3843	0.770553	0
1	64246626	64269696	ENSBTAG00000008562	POGLUT1	0.204	0.174	0.230139	0.617591	0
1	64275417	64295231	ENSBTAG00000012581	TIMMDC1	-0.186	0.281	0.507971	0.839325	0
1	64301489	64323696	ENSBTAG00000018059	CD80	-0.118	0.108	0.271332	0.658135	0
1	64334745	64377235	ENSBTAG00000009391	ADPRH	0.001	0.2	0.996011	0.999113	0
1	64425088	64432940	ENSBTAG00000002182	COX17	-0.231	0.115	0.0455003	0.304255	0
1	64646190	64861271	ENSBTAG00000048057	GSK3B	0.195	0.176	0.271332	0.658135	0
1	64938048	65020584	ENSBTAG00000001464	GPR156	-0.06	0.074	0.417366	0.789737	0
1	65078552	65096582	ENSBTAG00000033170	LRRC58	0.014	0.066	0.832107	0.958533	0
1	65138529	65198315	ENSBTAG00000022155	FSTL1	0.091	0.108	0.399228	0.779537	0
1	65318371	65324506	ENSBTAG00000015892	NDUFB4	-0.168	0.109	0.133614	0.501085	0
1	65387679	65433970	ENSBTAG00000015898	RABL3	-0.057	0.103	0.580263	0.872534	0
1	65433369	65474553	ENSBTAG00000016848	GTF2E1	0.018	0.12	0.880765	0.973527	0
1	65607598	65930952	ENSBTAG00000001918	STXBP5L	-0.12	0.047	0.00932238	0.125223	0
1	65944699	66053204	ENSBTAG00000001920	POLQ	-0.132	0.059	0.0278069	0.233704	0
1	66095751	66108659	ENSBTAG00000014508	FBXO40	0.143	0.119	0.230139	0.617591	0
1	66112082	66145729	ENSBTAG00000001009	HCLS1	-0.038	0.14	0.786391	0.947992	0
1	66151427	66215030	ENSBTAG00000008862	GOLGB1	-0.134	0.115	0.230139	0.617591	0
1	66248439	66293959	ENSBTAG00000013069	IQCB1	-0.398	0.176	0.0214482	0.20425	0
1	66294136	66349798	ENSBTAG00000013070	EAF2	-0.171	0.094	0.0718606	0.378219	0
1	66482692	66608853	ENSBTAG00000004705	ILDR1	-0.094	0.102	0.356529	0.753904	0
1	66543642	66610926	ENSBTAG00000013118	CD86	0.19	0.095	0.0455003	0.304255	0
1	66796530	66819338	ENSBTAG00000054520	CCDC58	-0.065	0.102	0.524125	0.847524	0
1	66820312	66861495	ENSBTAG00000011140	FAM162A	-0.043	0.114	0.706174	0.92038	0
1	66864803	66866398	ENSBTAG00000054326	WDR5B	-0.209	0.156	0.193601	0.577546	0
1	66875768	66944339	ENSBTAG00000011143	KPNA1	-0.102	0.227	0.653432	0.9031	0
1	66958506	66988476	ENSBTAG00000021791	PARP9	0.236	0.149	0.109599	0.460088	0
1	66988057	66996322	ENSBTAG00000009933	DTX3L	0.115	0.16	0.472141	0.82537	0
1	67012287	67058498	ENSBTAG00000016656	PARP14	0.1	0.097	0.317311	0.726324	0
1	67055375	67120252	ENSBTAG00000005066	HSPBAP1	-0.204	0.144	0.161513	0.539421	0
1	67239728	67280749	ENSBTAG00000018765	SEMA5B	0.037	0.043	0.389789	0.773447	0
1	67411430	67504231	ENSBTAG00000018877	PDIA5	-0.196	0.19	0.317311	0.726324	0
1	67555432	67637451	ENSBTAG00000014797	SEC22A	0.073	0.13	0.574116	0.869165	0
1	67666437	67823745	ENSBTAG00000018777	ADCY5	0.07	0.083	0.399228	0.779537	0
1	67866129	67952810	ENSBTAG00000023607	HACD2	0.503	0.165	0.0026998	0.0575565	0
1	67982278	68068472	ENSBTAG00000014567	MYLK	0.028	0.138	0.839135	0.96066	0
1	68289450	68332524	ENSBTAG00000000566	CCDC14	-0.028	0.108	0.795635	0.951264	0
1	68647206	68942661	ENSBTAG00000002640	KALRN	0.018	0.099	0.855583	0.965935	0
1	69127863	69178521	ENSBTAG00000013727	UMPS	0.377	0.143	0.00932238	0.125223	0
1	69196881	69312128	ENSBTAG00000013755	ITGB5	-0.124	0.127	0.329064	0.737502	0
1	69422854	69525187	ENSBTAG00000021396	HEG1	-0.059	0.108	0.585066	0.874704	0
1	69521456	69670381	ENSBTAG00000000496	SLC12A8	0.098	0.095	0.317311	0.726324	0
1	69686148	69766359	ENSBTAG00000050482	ZNF148	0.04	0.101	0.692105	0.914808	0
1	69887221	69946638	ENSBTAG00000011383	SNX4	0.144	0.174	0.40767	0.785245	0
1	69962379	70053523	ENSBTAG00000006471	OSBPL11	0.011	0.16	0.94499	0.990197	0
1	70125517	70172948	ENSBTAG00000044172	LMLN	0.217	0.173	0.193601	0.577546	0
1	70176689	70180132	ENSBTAG00000014208	RPL35A	-0.058	0.118	0.622719	0.889381	0
1	70180444	70226096	ENSBTAG00000018025	IQCG	0.239	0.093	0.00932238	0.125223	0
1	70229447	70335542	ENSBTAG00000032839	LRCH3	-0.235	0.145	0.109599	0.460088	0
1	70342777	70373184	ENSBTAG00000014874	FYTTD1	-0.159	0.115	0.161513	0.539421	0
1	70372268	70433147	ENSBTAG00000001890	RUBCN	-0.448	0.177	0.0124193	0.15137	0
1	70460152	70476679	ENSBTAG00000032819	MUC20	-0.166	0.07	0.0163951	0.175834	0
1	70600179	70627585	ENSBTAG00000021364	TNK2	0.147	0.112	0.193601	0.577546	0
1	70652654	70679923	ENSBTAG00000032719	TFRC	-0.066	0.05	0.193601	0.577546	0
1	70789424	70802153	ENSBTAG00000021515	ZDHHC19	-0.091	0.062	0.133614	0.501085	0
1	70824603	70878013	ENSBTAG00000016979	PCYT1A	-0.45	0.188	0.0163951	0.175834	0
1	70935047	70987415	ENSBTAG00000007577	UBXN7	-0.054	0.137	0.693581	0.915177	0
1	71020360	71048691	ENSBTAG00000013317	RNF168	-0.233	0.149	0.109599	0.460088	0
1	71087882	71101117	ENSBTAG00000014660	WDR53	0.204	0.157	0.193601	0.577546	0
1	71101138	71112719	ENSBTAG00000006388	FBXO45	0.004	0.103	0.96889	0.994891	0
1	71155752	71182955	ENSBTAG00000009614	NRROS	0.145	0.113	0.193601	0.577546	0
1	71223038	71228675	ENSBTAG00000013192	CEP19	0.18	0.106	0.0891309	0.421769	0
1	71232257	71252236	ENSBTAG00000048195	PIGX	0.526	0.133	6.33425e-05	0.00324319	0
1	71257814	71346318	ENSBTAG00000047856	PAK2	-0.174	0.119	0.133614	0.501085	0
1	71370900	71400231	ENSBTAG00000032674	SENP5	-0.231	0.116	0.0455003	0.304255	0
1	71404768	71410588	ENSBTAG00000008873	NCBP2	-0.393	0.123	0.00137428	0.0356293	0
1	71415019	71440654	ENSBTAG00000011659	PIGZ	-0.075	0.089	0.399228	0.779537	0
1	71476619	71500652	ENSBTAG00000002998	MELTF	-0.053	0.048	0.271332	0.658135	0
1	71513093	71780855	ENSBTAG00000020378	DLG1	0.165	0.146	0.271332	0.658135	0
1	71964668	72000537	ENSBTAG00000000448	BDH1	0.041	0.058	0.479566	0.828176	0
1	72061983	72075639	ENSBTAG00000023600	APOD	-0.034	0.076	0.654875	0.903258	0
1	72100094	72118577	ENSBTAG00000006724	PPP1R2	0.084	0.125	0.501584	0.837478	0
1	72150081	72264225	ENSBTAG00000003378	ACAP2	0.064	0.067	0.339578	0.742568	0
1	72326705	72499174	ENSBTAG00000014564	XXYLT1	-0.561	0.136	4.1315e-05	0.00228766	0
1	72861563	72862834	ENSBTAG00000008462	FAM43A	-0.332	0.159	0.0357288	0.268394	0
1	72877165	72901758	ENSBTAG00000008461	LSG1	-0.135	0.203	0.50605	0.839325	0
1	72908919	72956817	ENSBTAG00000002394	TMEM44	-0.008	0.089	0.928287	0.985624	0
1	73048103	73125832	ENSBTAG00000013204	ATP13A3	-0.09	0.095	0.343639	0.745454	0
1	73171521	73173275	ENSBTAG00000038600	LRRC15	0.059	0.029	0.0455003	0.304255	0
1	73362759	73365438	ENSBTAG00000000569	HES1	-0.068	0.083	0.412786	0.787538	0
1	73771857	73856448	ENSBTAG00000019514	OPA1	0.074	0.115	0.520224	0.845505	0
1	73893640	74020388	ENSBTAG00000016305	ATP13A4	0.127	0.068	0.0574331	0.341833	0
1	74489024	74609955	ENSBTAG00000005430	MB21D2	-0.047	0.117	0.687684	0.912611	0
1	74876548	75283017	ENSBTAG00000012413	FGF12	0.149	0.102	0.133614	0.501085	0
1	75926837	76006093	ENSBTAG00000006945	CCDC50	-0.409	0.215	0.0574331	0.341833	0
1	76577593	76723526	ENSBTAG00000013205	IL1RAP	-0.06	0.093	0.518927	0.845442	0
1	76973808	76989396	ENSBTAG00000013148	CLDN1	-0.093	0.073	0.193601	0.577546	1
1	77130100	77309576	ENSBTAG00000021025	P3H2	-0.162	0.084	0.0574331	0.341833	0
1	77389337	77689118	ENSBTAG00000015460	TP63	-0.072	0.071	0.317311	0.726324	1
1	78452386	79136219	ENSBTAG00000044001	LPP	0.125	0.101	0.230139	0.617591	0
1	79558314	79611183	ENSBTAG00000001511	BCL6	-0.088	0.128	0.491453	0.833644	0
1	79911983	79916543	ENSBTAG00000032265	RTP4	0.083	0.088	0.345681	0.746447	0
1	80006310	80074215	ENSBTAG00000012467	MASP1	-0.022	0.067	0.742912	0.934808	0
1	80194829	80267738	ENSBTAG00000010357	ST6GAL1	0.072	0.11	0.512468	0.841867	0
1	80416135	80427813	ENSBTAG00000052213	ADIPOQ	-0.023	0.034	0.499041	0.836657	0
1	80452885	80467441	ENSBTAG00000014727	RFC4	0.108	0.156	0.488937	0.83284	0
1	80467443	80473754	ENSBTAG00000014724	EIF4A2	-0.015	0.133	0.910031	0.981994	0
1	80506965	80530772	ENSBTAG00000005122	KNG1	0.028	0.026	0.271332	0.658135	0
1	80536976	80545514	ENSBTAG00000001265	HRG	0.034	0.023	0.133614	0.501085	0
1	80643739	80661936	ENSBTAG00000003151	DNAJB11	-0.387	0.091	1.70798e-05	0.00114211	0
1	80666383	80688899	ENSBTAG00000003143	TBCCD1	0.593	0.153	9.61927e-05	0.00456244	0
1	80873608	81097089	ENSBTAG00000005091	DGKG	0.187	0.052	0.000318217	0.0118359	0
1	81135305	81194599	ENSBTAG00000014915	ETV5	0.127	0.067	0.0574331	0.341833	0
1	81287578	81307980	ENSBTAG00000001697	TRA2B	-0.053	0.255	0.835229	0.95924	0
1	81402025	81572413	ENSBTAG00000007666	IGF2BP2	0.101	0.063	0.109599	0.460088	0
1	81586790	81621312	ENSBTAG00000001749	SENP2	-0.026	0.219	0.905275	0.980081	0
1	81636267	81688516	ENSBTAG00000001535	LIPH	0.088	0.055	0.109599	0.460088	0
1	81696499	81706039	ENSBTAG00000017115	TMEM41A	0.244	0.225	0.271332	0.658135	0
1	81711839	81868201	ENSBTAG00000017103	MAP3K13	0.093	0.115	0.418515	0.790335	0
1	81877674	81931209	ENSBTAG00000019625	EHHADH	-0.031	0.103	0.763414	0.939451	0
1	81984064	82104798	ENSBTAG00000005212	C1H3orf70	0.22	0.118	0.0574331	0.341833	0
1	82116216	82377026	ENSBTAG00000005209	VPS8	-0.094	0.152	0.536575	0.852847	1
1	82499645	82501239	ENSBTAG00000019014	MAGEF1	0.147	0.077	0.0574331	0.341833	0
1	82610922	82631983	ENSBTAG00000005313	EPHB3	0.085	0.073	0.230139	0.617591	0
1	82803353	82813103	ENSBTAG00000002878	CHRD	0.03	0.053	0.571394	0.868697	0
1	82824296	82829473	ENSBTAG00000040199	POLR2H	0.303	0.185	0.109599	0.460088	0
1	82830348	82844401	ENSBTAG00000012284	CLCN2	0.148	0.093	0.109599	0.460088	0
1	82845021	82851428	ENSBTAG00000012273	FAM131A	0.219	0.128	0.0891309	0.421769	0
1	82854035	82872768	ENSBTAG00000012881	EIF4G1	0.133	0.155	0.390892	0.774347	0
1	82878892	82888239	ENSBTAG00000005660	PSMD2	-0.208	0.211	0.324133	0.734114	0
1	82894597	82909029	ENSBTAG00000005658	ECE2	0.491	0.143	0.000673859	0.0207708	0
1	82927910	82933513	ENSBTAG00000005652	ALG3	0.045	0.074	0.543187	0.856902	0
1	82960351	82968194	ENSBTAG00000006920	ABCF3	0.413	0.19	0.0278069	0.233704	0
1	82970702	82977115	ENSBTAG00000020106	AP2M1	-0.345	0.191	0.0718606	0.378219	0
1	82981845	82996905	ENSBTAG00000019336	DVL3	0.083	0.123	0.499676	0.83669	0
1	83002134	83012323	ENSBTAG00000011414	EIF2B5	-0.079	0.235	0.736871	0.933349	0
1	83122147	83205242	ENSBTAG00000017666	ABCC5	0.037	0.11	0.736871	0.933349	0
1	83246423	83301299	ENSBTAG00000014460	PARL	-0.209	0.299	0.484552	0.831039	0
1	83304567	83311791	ENSBTAG00000014459	MAP6D1	0.187	0.139	0.193601	0.577546	0
1	83313948	83416551	ENSBTAG00000014451	YEATS2	-0.23	0.145	0.109599	0.460088	0
1	83449266	83481681	ENSBTAG00000017450	KLHL24	-0.135	0.109	0.230139	0.617591	0
1	83545202	83598532	ENSBTAG00000037951	KLHL6	-0.085	0.105	0.41794	0.789737	0
1	83653154	83911446	ENSBTAG00000010394	MCF2L2	0.015	0.066	0.820424	0.956569	0
1	83752076	83827942	ENSBTAG00000010397	B3GNT5	0.014	0.102	0.891031	0.97667	0
1	83922240	83951783	ENSBTAG00000006552	LAMP3	-0.062	0.101	0.539215	0.853938	0
1	83960686	84019357	ENSBTAG00000006548	MCCC1	-0.088	0.149	0.55452	0.862128	0
1	84042262	84074786	ENSBTAG00000012797	DCUN1D1	0.204	0.152	0.193601	0.577546	0
1	84108412	84205584	ENSBTAG00000000290	ATP11B	0.169	0.108	0.109599	0.460088	0
1	86035467	86040735	ENSBTAG00000023513	DNAJC19	-0.011	0.155	0.943398	0.989403	0
1	86047794	86121242	ENSBTAG00000016457	FXR1	0.058	0.15	0.698756	0.91716	0
1	86318896	86371093	ENSBTAG00000001969	CCDC39	0.043	0.099	0.664288	0.906535	0
1	86372984	86382674	ENSBTAG00000001968	TTC14	-0.089	0.155	0.565968	0.865394	0
1	87028551	87382268	ENSBTAG00000013219	PEX5L	-0.045	0.051	0.377777	0.767232	0
1	87355950	87482259	ENSBTAG00000005946	USP13	0.174	0.052	0.000966848	0.0273241	0
1	87503557	87518661	ENSBTAG00000002463	NDUFB5	0.017	0.1	0.86501	0.968536	0
1	87518534	87536139	ENSBTAG00000002462	MRPL47	-0.029	0.154	0.850877	0.965247	0
1	87536382	87567798	ENSBTAG00000002460	ACTL6A	0.143	0.124	0.230139	0.617591	0
1	87648347	87716734	ENSBTAG00000002767	GNB4	-0.252	0.107	0.0163951	0.175834	0
1	87721169	87765315	ENSBTAG00000010485	MFN1	-0.146	0.149	0.327086	0.735763	0
1	87780857	87785489	ENSBTAG00000037393	ZNF639	-0.178	0.111	0.109599	0.460088	0
1	87793359	87870663	ENSBTAG00000009235	KCNMB3	-0.177	0.083	0.0357288	0.268394	0
1	87879574	87964195	ENSBTAG00000009232	PIK3CA	-0.207	0.103	0.0455003	0.304255	0
1	88005930	88038010	ENSBTAG00000012463	ZMAT3	-0.381	0.143	0.00693395	0.103603	0
1	88354297	88362389	ENSBTAG00000054315	GTPBP6	0.019	0.166	0.909238	0.981765	0
1	90030089	90204389	ENSBTAG00000021910	TBL1XR1	0.068	0.116	0.557876	0.862128	0
1	91436009	92436553	ENSBTAG00000048493	NAALADL2	0.078	0.088	0.375618	0.766072	0
1	94320196	94597863	ENSBTAG00000031802	SPATA16	0.001	0.016	0.950563	0.992071	0
1	94709117	94769544	ENSBTAG00000023814	ECT2	0.039	0.089	0.661386	0.906314	0
1	94818555	94882838	ENSBTAG00000020073	NCEH1	-0.006	0.146	0.967296	0.994891	0
1	94985031	95001222	ENSBTAG00000018994	TNFSF10	-0.136	0.118	0.230139	0.617591	0
1	95121236	95406498	ENSBTAG00000019376	FNDC3B	0.032	0.151	0.832107	0.958533	0
1	95742044	95963408	ENSBTAG00000017490	PLD1	-0.037	0.092	0.687684	0.912611	0
1	96395573	96426824	ENSBTAG00000011742	TNIK	0.092	0.152	0.545179	0.857831	0
1	96572443	96576821	ENSBTAG00000007394	RPL22L1	-0.206	0.163	0.193601	0.577546	0
1	96999962	97014928	ENSBTAG00000019060	CLDN11	-0.005	0.029	0.863438	0.968281	0
1	97035501	97055587	ENSBTAG00000004154	SKIL	0.044	0.119	0.711382	0.923627	0
1	97094274	97163222	ENSBTAG00000001403	PRKCI	0	0.128	1	1	0
1	97196214	97271658	ENSBTAG00000013938	PHC3	0.09	0.129	0.485177	0.831528	0
1	97281198	97282211	ENSBTAG00000048011	GPR160	0.015	0.063	0.811881	0.955563	0
1	97388346	97421921	ENSBTAG00000039442	SEC62	0.069	0.118	0.558548	0.862128	0
1	97562712	97580517	ENSBTAG00000006409	LRRC34	0.087	0.106	0.411646	0.787186	0
1	97587928	97604139	ENSBTAG00000013142	MYNN	-0.031	0.121	0.797951	0.951615	0
1	97604626	97610506	ENSBTAG00000013141	ACTRT3	0	0.107	1	1	0
1	98280869	98347503	ENSBTAG00000005871	MECOM	0.061	0.138	0.658489	0.905793	0
1	99361283	99445684	ENSBTAG00000018727	GOLIM4	-0.141	0.151	0.350304	0.749025	1
1	99744376	99804996	ENSBTAG00000031709	PDCD10	0.001	0.137	0.994415	0.998249	1
1	101522744	101601660	ENSBTAG00000011139	BCHE	0.014	0.039	0.719595	0.926037	0
1	106150166	106186579	ENSBTAG00000016228	NMD3	0.18	0.126	0.161513	0.539421	0
1	106376776	106377770	ENSBTAG00000046104	B3GALNT1	0.06	0.069	0.3843	0.770553	0
1	106405113	106727070	ENSBTAG00000001274	PPM1L	0.193	0.12	0.109599	0.460088	0
1	106924853	107002190	ENSBTAG00000017416	KPNA4	-0.031	0.141	0.825871	0.956569	0
1	107030008	107042373	ENSBTAG00000008078	TRIM59	0.332	0.134	0.0124193	0.15137	0
1	107045175	107078624	ENSBTAG00000005862	SMC4	0.143	0.147	0.330553	0.73763	0
1	107094668	107209406	ENSBTAG00000031572	IFT80	0.189	0.136	0.161513	0.539421	0
1	107552681	107731909	ENSBTAG00000014960	SCHIP1	0.079	0.091	0.385394	0.770978	0
1	108706429	108732991	ENSBTAG00000009263	MFSD1	-0.168	0.128	0.193601	0.577546	0
1	108807496	108849597	ENSBTAG00000014713	RARRES1	-0.043	0.101	0.670108	0.907727	0
1	108852511	108903175	ENSBTAG00000027795	GFM1	0.004	0.156	0.979257	0.995859	0
1	108867031	108874756	ENSBTAG00000009336	LXN	-0.425	0.118	0.000318217	0.0118359	0
1	108908179	108938862	ENSBTAG00000004126	MLF1	0.135	0.1	0.161513	0.539421	0
1	108967043	109414482	ENSBTAG00000031561	RSRC1	0.265	0.171	0.133614	0.501085	1
1	109417834	109426592	ENSBTAG00000005230	SHOX2	0.064	0.052	0.230139	0.617591	0
1	110066582	110342096	ENSBTAG00000024643	VEPH1	0.077	0.075	0.317311	0.726324	0
1	110158198	110164262	ENSBTAG00000009012	PTX3	-0.05	0.048	0.317311	0.726324	0
1	110447554	110461439	ENSBTAG00000003851	CCNL1	0.101	0.218	0.643364	0.900063	0
1	110928202	110955891	ENSBTAG00000012120	TIPARP	-0.133	0.101	0.193601	0.577546	0
1	111095638	111107466	ENSBTAG00000018471	SSR3	-0.036	0.093	0.698756	0.91716	0
1	111111924	111559606	ENSBTAG00000018465	KCNAB1	-0.059	0.061	0.333544	0.739282	0
1	111732900	111804777	ENSBTAG00000013013	GMPS	0.162	0.232	0.485177	0.831528	0
1	111829274	111850038	ENSBTAG00000014318	SLC33A1	0.016	0.121	0.894984	0.9782	0
1	111876350	111901894	ENSBTAG00000005203	C1H3orf33	0.066	0.092	0.473374	0.825638	0
1	111945804	112167879	ENSBTAG00000008307	PLCH1	0.031	0.063	0.622719	0.889381	0
1	112478989	112595507	ENSBTAG00000002075	MME	-0.087	0.114	0.445463	0.809134	0
1	113326569	113371550	ENSBTAG00000006142	DHX36	0.009	0.112	0.936237	0.987224	0
1	113382720	113519848	ENSBTAG00000013439	ARHGEF26	0.037	0.089	0.67741	0.909232	0
1	114554443	114558377	ENSBTAG00000055257	RAP2B	0.033	0.185	0.858723	0.967427	0
1	114908447	114910097	ENSBTAG00000001465	P2RY1	-0.008	0.054	0.882343	0.973688	0
1	115303718	115524968	ENSBTAG00000004564	MBNL1	0.102	0.119	0.391445	0.774347	0
1	115938554	115949379	ENSBTAG00000053581	SUCNR1	0.141	0.1	0.161513	0.539421	0
1	116623017	116652023	ENSBTAG00000001728	IGSF10	0.049	0.07	0.483927	0.831039	0
1	116654940	117017533	ENSBTAG00000021703	MED12L	0.05	0.088	0.570035	0.867602	0
1	116694941	116747192	ENSBTAG00000015837	P2RY12	-0.122	0.085	0.161513	0.539421	0
1	116847497	116879544	ENSBTAG00000020990	P2RY14	0.12	0.073	0.109599	0.460088	0
1	116891760	116898285	ENSBTAG00000009848	GPR171	0.118	0.106	0.271332	0.658135	0
1	117361864	117380735	ENSBTAG00000023445	SIAH2	-0.136	0.212	0.520873	0.845505	0
1	117507281	117537602	ENSBTAG00000031435	SELENOT	-0.213	0.139	0.133614	0.501085	0
1	117556623	117597952	ENSBTAG00000009106	EIF2A	-0.045	0.143	0.752762	0.937935	0
1	117598268	117600549	ENSBTAG00000009104	SERP1	-0.059	0.087	0.497772	0.835445	0
1	117672585	117718237	ENSBTAG00000018402	TSC22D2	-0.088	0.168	0.600279	0.880311	0
1	118213388	118220074	ENSBTAG00000011150	PFN2	-0.017	0.104	0.870518	0.969988	0
1	118223007	118350034	ENSBTAG00000011147	RNF13	-0.066	0.166	0.69063	0.913845	0
1	118403615	118414343	ENSBTAG00000005068	COMMD2	-0.127	0.179	0.478324	0.827432	0
1	118469263	118642804	ENSBTAG00000007814	WWTR1	0.143	0.227	0.528695	0.848699	0
1	118809503	118817968	ENSBTAG00000015163	TM4SF1	0.009	0.128	0.944194	0.989899	0
1	118858862	118883835	ENSBTAG00000019960	TM4SF18	-0.06	0.075	0.423711	0.793048	0
1	118901381	119012034	ENSBTAG00000012164	CP	0.016	0.063	0.799496	0.952158	0
1	118969378	119046161	ENSBTAG00000002395	HPS3	-0.491	0.178	0.00511026	0.0879525	0
1	119074041	119137489	ENSBTAG00000019704	HLTF	0.044	0.145	0.76189	0.939451	0
1	119150402	119191206	ENSBTAG00000001721	GYG1	-0.172	0.145	0.230139	0.617591	0
1	119297388	119329547	ENSBTAG00000015008	CPA3	0.037	0.045	0.411077	0.787186	0
1	119465679	119521250	ENSBTAG00000045633	AGTR1	0.252	0.112	0.0278069	0.233704	0
1	121946372	121974115	ENSBTAG00000022227	PLSCR2	0.417	0.109	0.000144696	0.00643871	0
1	122257891	122300144	ENSBTAG00000011986	PLSCR4	-0.267	0.161	0.0891309	0.421769	0
1	122349984	122471157	ENSBTAG00000007331	PLOD2	0.106	0.094	0.271332	0.658135	0
1	125042863	125706599	ENSBTAG00000031178	SLC9A9	-0.082	0.12	0.494607	0.835183	0
1	125870591	125874332	ENSBTAG00000011584	CHST2	0.209	0.128	0.109599	0.460088	0
1	125961513	125987011	ENSBTAG00000009154	U2SURP	0.125	0.154	0.416792	0.789737	0
1	126132067	126231903	ENSBTAG00000016026	PCOLCE2	-0.003	0.057	0.957732	0.993185	0
1	126259412	126320424	ENSBTAG00000002232	TRPC1	-0.061	0.106	0.565291	0.865008	0
1	126325256	126418836	ENSBTAG00000023429	PLS1	-0.06	0.057	0.271332	0.658135	0
1	126471505	126591861	ENSBTAG00000011529	ATR	-0.253	0.103	0.0124193	0.15137	0
1	126593243	126700958	ENSBTAG00000011524	XRN1	-0.133	0.094	0.161513	0.539421	0
1	126736159	126814507	ENSBTAG00000018138	GK5	-0.012	0.107	0.910823	0.981994	0
1	126884717	127026615	ENSBTAG00000006222	TFDP2	-0.17	0.129	0.193601	0.577546	0
1	127050091	127086255	ENSBTAG00000014140	ATP1B3	0.122	0.137	0.372929	0.764539	0
1	127214846	127222120	ENSBTAG00000002185	RNF7	-0.166	0.145	0.271332	0.658135	0
1	127345515	127469070	ENSBTAG00000015413	RASA2	-0.088	0.121	0.467226	0.822299	0
1	127530714	127574835	ENSBTAG00000040061	ZBTB38	0.127	0.144	0.377777	0.767232	0
1	127673805	127774738	ENSBTAG00000050763	PXYLP1	-0.014	0.123	0.909238	0.981765	0
1	128008638	128042419	ENSBTAG00000015310	SLC25A36	0.187	0.182	0.317311	0.726324	0
1	128385395	128561717	ENSBTAG00000008714	CLSTN2	-0.009	0.026	0.729343	0.929394	0
1	129556881	129560370	ENSBTAG00000020028	RBP1	-0.045	0.047	0.338567	0.742568	0
1	129706887	129741285	ENSBTAG00000014843	COPB2	0.162	0.121	0.193601	0.577546	0
1	129741091	129754572	ENSBTAG00000047608	MRPS22	0.051	0.172	0.766467	0.940087	0
1	130293099	130471254	ENSBTAG00000006909	PIK3CB	-0.168	0.144	0.230139	0.617591	0
1	130488923	130505304	ENSBTAG00000023426	FAIM	-0.229	0.112	0.0455003	0.304255	0
1	130531395	130598375	ENSBTAG00000018538	CEP70	-0.335	0.108	0.00193521	0.0465248	0
1	130610161	130664345	ENSBTAG00000008111	ESYT3	-0.051	0.073	0.484552	0.831039	0
1	130707102	130773432	ENSBTAG00000001497	MRAS	0.13	0.126	0.317311	0.726324	0
1	130822345	130930767	ENSBTAG00000019952	ARMC8	-0.204	0.191	0.271332	0.658135	0
1	130942894	130955677	ENSBTAG00000019949	DBR1	0.065	0.173	0.706917	0.920662	0
1	131015352	131071635	ENSBTAG00000015198	DZIP1L	0.16	0.066	0.0163951	0.175834	0
1	132167385	132207262	ENSBTAG00000008299	IL20RB	-0.124	0.072	0.0891309	0.421769	0
1	132216626	132292949	ENSBTAG00000018427	NCK1	0.033	0.133	0.804134	0.953864	0
1	132757274	132922494	ENSBTAG00000035437	STAG1	-0.122	0.13	0.348244	0.746447	0
1	132920382	133024359	ENSBTAG00000015221	PCCB	0.266	0.109	0.0163951	0.175834	0
1	133084511	133113773	ENSBTAG00000000750	MSL2	-0.26	0.158	0.109599	0.460088	0
1	133116975	133350011	ENSBTAG00000023416	PPP2R3A	-0.185	0.093	0.0455003	0.304255	0
1	134765523	134838769	ENSBTAG00000007014	CEP63	-0.184	0.167	0.271332	0.658135	0
1	134839356	134845010	ENSBTAG00000014461	ANAPC13	-0.223	0.156	0.161513	0.539421	0
1	134947902	134965883	ENSBTAG00000000742	AMOTL2	-0.051	0.1	0.610051	0.884398	0
1	135082834	135191082	ENSBTAG00000016999	RYK	0.015	0.167	0.928287	0.985624	0
1	135336540	135423996	ENSBTAG00000001324	SLCO2A1	0.055	0.058	0.343129	0.745142	0
1	135579069	135618070	ENSBTAG00000007273	TF	-0.036	0.024	0.133614	0.501085	0
1	135753514	135824423	ENSBTAG00000000526	TOPBP1	-0.229	0.142	0.109599	0.460088	0
1	135867529	135881717	ENSBTAG00000035556	CDV3	-0.164	0.249	0.509896	0.840463	0
1	136814837	136869560	ENSBTAG00000005769	NPHP3	0.26	0.19	0.161513	0.539421	0
1	136872755	136905496	ENSBTAG00000004495	UBA5	0.124	0.125	0.321198	0.732618	0
1	136905776	137025947	ENSBTAG00000031010	ACAD11	0.476	0.111	1.70798e-05	0.00114211	0
1	136981306	136983324	ENSBTAG00000019577	ACKR4	0.305	0.083	0.000215599	0.00885332	0
1	137051554	137215251	ENSBTAG00000002966	DNAJC13	0.04	0.13	0.758082	0.938933	0
1	138384449	138441532	ENSBTAG00000030942	MRPL3	-0.005	0.187	0.97846	0.99571	0
1	138547391	138550417	ENSBTAG00000018749	NUDT16	0.021	0.112	0.850877	0.965247	0
1	138839426	138853788	ENSBTAG00000007462	ASTE1	0.28	0.143	0.0455003	0.304255	0
1	138872223	139026120	ENSBTAG00000011626	ATP2C1	0.132	0.154	0.391445	0.774347	0
1	139225714	139238322	ENSBTAG00000013600	PSMG1	0.362	0.162	0.0278069	0.233704	0
1	139238832	139362519	ENSBTAG00000013602	BRWD1	0.021	0.102	0.836791	0.959862	0
1	139406045	139412414	ENSBTAG00000018768	HMGN1	-0.114	0.173	0.509896	0.840463	0
1	139528818	139600025	ENSBTAG00000007068	SH3BGR	-0.145	0.111	0.193601	0.577546	0
1	139747766	139748825	ENSBTAG00000023407	B3GALT5	0.019	0.042	0.651269	0.9031	0
1	139827395	139881435	ENSBTAG00000002029	IGSF5	-0.121	0.117	0.317311	0.726324	0
1	139937150	140005775	ENSBTAG00000051421	PCP4	-0.016	0.041	0.696537	0.916212	0
1	141381147	141486921	ENSBTAG00000000394	BACE2	0.014	0.059	0.812657	0.956108	0
1	141551208	141617001	ENSBTAG00000030921	FAM3B	0.024	0.034	0.480188	0.828782	0
1	141621165	141658223	ENSBTAG00000008471	MX2	0.037	0.04	0.354966	0.75242	0
1	141677687	141706496	ENSBTAG00000030913	MX1	-0.068	0.061	0.271332	0.658135	0
1	141713171	141747814	ENSBTAG00000009132	TMPRSS2	0.067	0.104	0.519575	0.845505	0
1	142011078	142037290	ENSBTAG00000021251	RIPK4	-0.029	0.121	0.81033	0.954932	0
1	142065605	142132485	ENSBTAG00000021253	PRDM15	0.451	0.168	0.00693395	0.103603	0
1	142142610	142204837	ENSBTAG00000021259	C2CD2	-0.013	0.117	0.911616	0.981994	0
1	142235364	142253631	ENSBTAG00000030836	ZBTB21	-0.066	0.118	0.576162	0.870216	1
1	142488705	142561127	ENSBTAG00000021272	ABCG1	0.016	0.071	0.821979	0.956569	0
1	142565466	142569246	ENSBTAG00000021276	TFF3	-0.237	0.065	0.000318217	0.0118359	0
1	142694786	142737902	ENSBTAG00000023398	UBASH3A	-0.217	0.088	0.0124193	0.15137	0
1	142814827	142872558	ENSBTAG00000021286	SLC37A1	0.687	0.163	2.66915e-05	0.00164962	0
1	142930579	143034932	ENSBTAG00000021899	PDE9A	-0.005	0.121	0.967296	0.994891	0
1	143087683	143108077	ENSBTAG00000021490	WDR4	-0.043	0.115	0.708404	0.921325	0
1	143119850	143131757	ENSBTAG00000021491	NDUFV3	0.254	0.246	0.317311	0.726324	0
1	143182017	143202288	ENSBTAG00000014153	PKNOX1	0.246	0.242	0.317311	0.726324	0
1	143219189	143242441	ENSBTAG00000000160	CBS	0.055	0.111	0.6206	0.889202	0
1	143261977	143274941	ENSBTAG00000011645	U2AF1	-0.155	0.201	0.440707	0.803955	0
1	143641658	143729051	ENSBTAG00000017407	HSF2BP	-0.266	0.111	0.0163951	0.175834	0
1	143729215	143755086	ENSBTAG00000017418	RRP1B	0.064	0.198	0.746695	0.935146	0
1	143782380	143810301	ENSBTAG00000018186	PDXK	-0.228	0.113	0.0455003	0.304255	0
1	143819489	143823793	ENSBTAG00000018189	CSTB	0.164	0.019	7.97161e-18	4.43403e-15	0
1	143851101	143874772	ENSBTAG00000003981	RRP1	0.05	0.143	0.726339	0.92866	0
1	143941826	144025795	ENSBTAG00000020456	AGPAT3	0.65	0.203	0.00137428	0.0356293	0
1	144056126	144132832	ENSBTAG00000007100	TRAPPC10	0.147	0.272	0.589197	0.87617	0
1	144148919	144158060	ENSBTAG00000007106	GATD3A	0.213	0.157	0.161513	0.539421	0
1	144308711	144335975	ENSBTAG00000010658	PFKL	0.075	0.139	0.589197	0.87617	0
1	144361187	144410547	ENSBTAG00000021901	TRPM2	-0.025	0.084	0.765703	0.939905	0
1	144659041	144684327	ENSBTAG00000048090	UBE2G2	0.135	0.193	0.484552	0.831039	0
1	144687135	144696665	ENSBTAG00000017321	SUMO3	-0.036	0.177	0.839135	0.96066	0
1	144713171	144730575	ENSBTAG00000021771	PTTG1IP	0.044	0.213	0.83601	0.959776	0
1	144759527	144789479	ENSBTAG00000017060	ITGB2	-0.031	0.091	0.733104	0.931373	0
1	144809574	144833722	ENSBTAG00000017010	FAM207A	-0.029	0.13	0.823536	0.956569	0
1	144937738	145050738	ENSBTAG00000017486	ADARB1	0.009	0.118	0.939419	0.98828	1
1	145089416	145103157	ENSBTAG00000007818	POFUT2	0.421	0.161	0.00932238	0.125223	0
1	145202138	145296595	ENSBTAG00000023907	COL18A1	-0.013	0.078	0.86737	0.968696	0
1	145299698	145325287	ENSBTAG00000024162	SLC19A1	0.068	0.045	0.133614	0.501085	0
1	145668949	145687210	ENSBTAG00000011802	COL6A1	0.169	0.088	0.0574331	0.341833	0
1	145807169	145837649	ENSBTAG00000019269	COL6A2	0.103	0.081	0.193601	0.577546	0
1	145889102	145919613	ENSBTAG00000018936	LSS	0.067	0.122	0.583005	0.873651	0
1	145931228	145971979	ENSBTAG00000003148	MCM3AP	-0.27	0.332	0.416218	0.789737	0
1	145972840	145977560	ENSBTAG00000003161	YBEY	0.238	0.118	0.0455003	0.304255	0
1	145988468	145994118	ENSBTAG00000021984	C1H21orf58	0.175	0.083	0.0357288	0.268394	0
1	146001886	146105891	ENSBTAG00000030670	PCNT	0.126	0.163	0.439522	0.802991	0
1	146121832	146241261	ENSBTAG00000011495	DIP2A	0.06	0.136	0.659213	0.905951	0
1	146272607	146280008	ENSBTAG00000004777	S100B	0.126	0.091	0.161513	0.539421	0
1	146320299	146345063	ENSBTAG00000005503	PRMT2	0.24	0.143	0.0891309	0.421769	0
1	146528127	146556177	ENSBTAG00000007039	FBXO25	0.292	0.183	0.109599	0.460088	0
1	146562507	146607459	ENSBTAG00000043957	TDRP	0.049	0.114	0.667196	0.907145	0
1	146975141	147244722	ENSBTAG00000004742	RUNX1	0.177	0.085	0.0357288	0.268394	0
1	148306238	148341194	ENSBTAG00000018682	SETD4	-0.031	0.102	0.761128	0.939451	0
1	148440558	148450711	ENSBTAG00000018688	CBR3	0.113	0.095	0.230139	0.617591	0
1	148604900	148639711	ENSBTAG00000011876	MORC3	0.089	0.101	0.378318	0.767232	0
1	148657613	148683915	ENSBTAG00000011880	CHAF1B	-0.023	0.094	0.806456	0.954226	0
1	149031196	149199816	ENSBTAG00000033679	HLCS	0.334	0.195	0.0891309	0.421769	0
1	149301433	149317939	ENSBTAG00000055107	PIGP	-0.471	0.051	3.5795e-20	2.30538e-17	0
1	149318018	149436586	ENSBTAG00000008167	TTC3	-0.714	0.092	6.19072e-15	2.29563e-12	0
1	149461702	149496009	ENSBTAG00000004791	VPS26C	-0.589	0.196	0.0026998	0.0575565	0
1	149567810	149711585	ENSBTAG00000001771	DYRK1A	0.044	0.207	0.831327	0.958356	0
1	150591084	150595749	ENSBTAG00000000973	KCNJ15	0.201	0.055	0.000215599	0.00885332	0
1	150668926	150803833	ENSBTAG00000011001	ERG	-0.012	0.133	0.928287	0.985624	0
1	151161814	151181631	ENSBTAG00000009214	ETS2	0.285	0.102	0.00511026	0.0879525	0
1	151476118	151562607	ENSBTAG00000020787	PIK3R4	0.008	0.178	0.964107	0.99467	0
1	151788694	151939725	ENSBTAG00000049122	COL6A5	0.039	0.05	0.435391	0.801426	0
1	152232655	152284372	ENSBTAG00000006479	CAPN7	0.044	0.148	0.766467	0.940087	0
1	152286347	152366452	ENSBTAG00000023377	SH3BP5	-0.981	0.064	7.64566e-53	9.356e-49	0
1	152434570	152450925	ENSBTAG00000023375	METTL6	-0.614	0.225	0.00693395	0.103603	0
1	152450841	152463273	ENSBTAG00000019202	EAF1	-1.2	0.169	1.24757e-12	3.72354e-10	0
1	152599803	152638556	ENSBTAG00000003718	HACL1	0.373	0.125	0.0026998	0.0575565	0
1	152638136	152679233	ENSBTAG00000019129	BTD	0.293	0.174	0.0891309	0.421769	0
1	152701411	152833098	ENSBTAG00000024815	ANKRD28	0.001	0.17	0.995213	0.998558	0
1	153179306	153226107	ENSBTAG00000008240	GALNT15	0.059	0.053	0.271332	0.658135	0
1	153260324	153266600	ENSBTAG00000003916	DPH3	0.322	0.2	0.109599	0.460088	0
1	153274404	153318611	ENSBTAG00000004891	OXNAD1	0.024	0.26	0.926698	0.984888	0
1	153882096	154095595	ENSBTAG00000009942	PLCL2	0.315	0.127	0.0124193	0.15137	0
1	154096128	154616588	ENSBTAG00000030581	TBC1D5	0.116	0.152	0.445463	0.809134	0
1	155431343	155525165	ENSBTAG00000021158	SATB1	0.12	0.098	0.230139	0.617591	0
1	156340497	156841779	ENSBTAG00000012798	KCNH8	-0.004	0.036	0.911616	0.981994	0
1	157125001	157190548	ENSBTAG00000013806	EFHB	0.342	0.124	0.00511026	0.0879525	0
1	157198501	157232069	ENSBTAG00000046385	RAB5A	0.134	0.171	0.43304	0.80047	0
1	157232248	157249033	ENSBTAG00000004061	PP2D1	-0.105	0.091	0.230139	0.617591	0
1	157277141	157374828	ENSBTAG00000000746	KAT2B	-0.345	0.206	0.0891309	0.421769	0
1	157490908	157500089	ENSBTAG00000049158	ZNF596	-0.255	0.116	0.0278069	0.233704	0
1	158075340	158077174	ENSBTAG00000037965	ZSCAN23	-0.071	0.044	0.109599	0.460088	0
1	158215919	158228038	ENSBTAG00000012867	TXLNA	-0.369	0.29	0.193601	0.577546	0
1	158238278	158293060	ENSBTAG00000002896	KPNA6	-0.243	0.179	0.161513	0.539421	0
1	158296611	158315972	ENSBTAG00000016954	TMEM39B	-0.1	0.109	0.359143	0.755125	0
1	158336214	158359816	ENSBTAG00000012497	KHDRBS1	-0.239	0.241	0.321198	0.732618	0
2	719767	951758	ENSBTAG00000013916	HERC2	-0.171	0.121	0.161513	0.539421	0
2	989536	1034413	ENSBTAG00000002316	NIPA1	0.164	0.137	0.230139	0.617591	0
2	1044598	1064844	ENSBTAG00000016895	NIPA2	-0.042	0.228	0.854013	0.965588	0
2	1066691	1175326	ENSBTAG00000016894	CYFIP1	-0.255	0.31	0.410508	0.787186	0
2	1232958	1284056	ENSBTAG00000014714	TUBGCP5	-0.384	0.154	0.0124193	0.15137	0
2	1314158	1318235	ENSBTAG00000015841	CCDC115	-0.195	0.096	0.0455003	0.304255	0
2	1318420	1323393	ENSBTAG00000003225	IMP4	-0.383	0.135	0.00511026	0.0879525	0
2	1322993	1352673	ENSBTAG00000011658	PTPN18	-0.453	0.163	0.00511026	0.0879525	0
2	1679994	1864849	ENSBTAG00000015834	ARHGEF4	0.096	0.082	0.230139	0.617591	0
2	1865381	1906516	ENSBTAG00000034978	FAM168B	0.161	0.139	0.230139	0.617591	0
2	1920239	1969794	ENSBTAG00000000941	PLEKHB2	-0.156	0.153	0.317311	0.726324	0
2	4187288	4227153	ENSBTAG00000050824	HS6ST1	-0.416	0.143	0.00373163	0.0724824	0
2	4300416	4399011	ENSBTAG00000005444	UGGT1	-0.114	0.107	0.271332	0.658135	0
2	4454874	4530094	ENSBTAG00000006003	SAP130	0.077	0.165	0.6405	0.89883	0
2	4601012	4621042	ENSBTAG00000008089	AMMECR1L	-0.389	0.242	0.109599	0.460088	0
2	4623473	4636747	ENSBTAG00000053244	POLR2D	-0.181	0.139	0.193601	0.577546	0
2	4676998	4785534	ENSBTAG00000005987	WDR33	0.084	0.145	0.562589	0.864223	0
2	4790398	4791060	ENSBTAG00000005986	SFT2D3	0.06	0.175	0.731598	0.930717	0
2	4842239	4887427	ENSBTAG00000006262	LIMS2	-0.018	0.074	0.808005	0.954662	0
2	4872953	4878988	ENSBTAG00000006261	GPR17	0.001	0.069	0.98883	0.997553	0
2	5031102	5057954	ENSBTAG00000021172	IWS1	0.159	0.185	0.390341	0.773914	0
2	5102165	5112861	ENSBTAG00000003950	PROC	-0.034	0.029	0.230139	0.617591	0
2	5199357	5234002	ENSBTAG00000004216	MAP3K2	0.017	0.124	0.891031	0.97667	0
2	5248748	5279066	ENSBTAG00000020777	ERCC3	-0.026	0.293	0.929082	0.985624	0
2	5418420	5475051	ENSBTAG00000019177	BIN1	-0.042	0.123	0.733104	0.931373	0
2	5634458	5683747	ENSBTAG00000000266	NAB1	0.129	0.143	0.367057	0.761887	0
2	5786098	5810777	ENSBTAG00000015678	NEMP2	0.209	0.18	0.230139	0.617591	0
2	5820563	5881926	ENSBTAG00000007719	MFSD6	0.363	0.198	0.0718606	0.378219	0
2	5934748	5970809	ENSBTAG00000007584	INPP1	-0.05	0.144	0.728591	0.929394	0
2	5980697	6129150	ENSBTAG00000007787	HIBCH	0.285	0.196	0.133614	0.501085	0
2	6100685	6178350	ENSBTAG00000026994	C2H2orf88	0.045	0.066	0.495239	0.835183	0
2	6278630	6285486	ENSBTAG00000011808	MSTN	0.046	0.022	0.0357288	0.268394	0
2	6460095	6592355	ENSBTAG00000018795	PMS1	0.125	0.114	0.271332	0.658135	0
2	6572135	6584583	ENSBTAG00000012561	ORMDL1	0.195	0.207	0.346193	0.746447	0
2	6592659	6603565	ENSBTAG00000012557	OSGEPL1	0.262	0.14	0.0574331	0.341833	0
2	6605784	6657432	ENSBTAG00000012554	ANKAR	-0.003	0.081	0.970485	0.995042	0
2	6665574	6676526	ENSBTAG00000000492	ASNSD1	0.253	0.21	0.230139	0.617591	0
2	6776416	6800154	ENSBTAG00000010498	SLC40A1	0.176	0.159	0.271332	0.658135	0
2	6935086	6976756	ENSBTAG00000003002	WDR75	0.06	0.157	0.702461	0.919066	0
2	7198509	7357287	ENSBTAG00000027020	COL5A2	0.342	0.125	0.00693395	0.103603	0
2	7375289	7414912	ENSBTAG00000021466	COL3A1	0.129	0.078	0.0891309	0.421769	0
2	7839124	7933339	ENSBTAG00000007141	GULP1	0.085	0.094	0.365995	0.760905	0
2	8776893	8875333	ENSBTAG00000049919	TFPI	-0.214	0.078	0.00693395	0.103603	0
2	8891734	9020442	ENSBTAG00000008483	CALCRL	-0.096	0.103	0.351337	0.749327	0
2	9553295	9633357	ENSBTAG00000050392	FAM171B	-0.142	0.086	0.0891309	0.421769	0
2	9644368	9749556	ENSBTAG00000019929	ITGAV	0.186	0.137	0.161513	0.539421	0
2	9838366	9859389	ENSBTAG00000021762	ZC3H15	-0.157	0.22	0.475227	0.826397	0
2	13426631	13458918	ENSBTAG00000009777	NUP35	0.351	0.148	0.0163951	0.175834	0
2	13474287	13490743	ENSBTAG00000020961	DUSP19	0.237	0.105	0.0214482	0.20425	0
2	13528238	13633956	ENSBTAG00000033662	NCKAP1	0.131	0.135	0.332046	0.738639	0
2	13794248	13842369	ENSBTAG00000008390	DNAJC10	0.224	0.204	0.271332	0.658135	0
2	14056093	14453673	ENSBTAG00000012100	PDE1A	0.118	0.103	0.271332	0.658135	0
2	15083908	15176065	ENSBTAG00000009256	ITGA4	-0.048	0.076	0.527387	0.848269	0
2	15639801	15731672	ENSBTAG00000043956	UBE2E3	0.297	0.222	0.193601	0.577546	0
2	16813692	16875835	ENSBTAG00000021726	CWC22	0.137	0.157	0.382663	0.76954	0
2	17618997	17764631	ENSBTAG00000001861	SESTD1	0.021	0.111	0.850093	0.965168	0
2	17799007	18020703	ENSBTAG00000027875	CCDC141	-0.067	0.1	0.502858	0.837772	0
2	18388139	18415849	ENSBTAG00000001098	PLEKHA3	0.157	0.152	0.317311	0.726324	0
2	18418695	18426410	ENSBTAG00000001097	FKBP7	0.081	0.115	0.481433	0.829526	0
2	18437895	18454695	ENSBTAG00000001096	PRKRA	0.019	0.114	0.86737	0.968696	0
2	18481775	18696841	ENSBTAG00000014405	OSBPL6	0.096	0.148	0.516338	0.843808	0
2	18758172	18779396	ENSBTAG00000006168	RBM45	0.372	0.215	0.0891309	0.421769	0
2	19259234	19262164	ENSBTAG00000027694	TTC30A	-0.132	0.146	0.365995	0.760905	0
2	19325706	19328340	ENSBTAG00000027696	TTC30B	-0.22	0.1	0.0278069	0.233704	0
2	19341272	19468765	ENSBTAG00000009897	AGPS	-0.018	0.124	0.884711	0.974281	0
2	19617026	19649649	ENSBTAG00000019255	NFE2L2	-0.354	0.242	0.133614	0.501085	0
2	19658429	19663581	ENSBTAG00000021580	HNRNPA3	0.21	0.12	0.0718606	0.378219	0
2	20568451	20644147	ENSBTAG00000006693	MTX2	0.029	0.168	0.862651	0.968281	0
2	20740712	20760616	ENSBTAG00000004835	HOXD3	0.005	0.114	0.964904	0.994891	0
2	20759992	20762165	ENSBTAG00000039581	HOXD4	0.029	0.119	0.807231	0.954496	0
2	20781821	20783046	ENSBTAG00000049845	HOXD8	-0.037	0.116	0.749727	0.936546	0
2	20789261	20790650	ENSBTAG00000016033	HOXD9	0.1	0.087	0.271332	0.658135	0
2	20906685	21011464	ENSBTAG00000018061	LNPK	-0.112	0.172	0.515046	0.84316	0
2	21688062	21691528	ENSBTAG00000002944	ATP5MC3	0.082	0.119	0.490823	0.833644	0
2	21736325	21792993	ENSBTAG00000002295	ATF2	-0.183	0.167	0.271332	0.658135	0
2	21843101	22045348	ENSBTAG00000008028	CHN1	0.222	0.128	0.0891309	0.421769	0
2	22084295	22103950	ENSBTAG00000018253	CHRNA1	0.003	0.04	0.940215	0.988352	0
2	22130033	22259090	ENSBTAG00000001585	WIPF1	0.088	0.133	0.507971	0.839325	0
2	22319664	22358578	ENSBTAG00000021636	GPR155	-0.138	0.154	0.370253	0.762501	0
2	22365327	22397420	ENSBTAG00000012966	SCRN3	0.405	0.088	4.22491e-06	0.00033791	0
2	22397395	22442851	ENSBTAG00000038620	CIR1	0.479	0.227	0.0357288	0.268394	0
2	22528224	22693132	ENSBTAG00000006970	OLA1	-0.205	0.178	0.230139	0.617591	0
2	22797327	22853605	ENSBTAG00000000176	SP3	0.164	0.124	0.193601	0.577546	0
2	23340522	23353696	ENSBTAG00000003458	CDCA7	-0.078	0.069	0.271332	0.658135	0
2	23405489	23558475	ENSBTAG00000001083	MAP3K20	0.027	0.122	0.825092	0.956569	0
2	23607682	23937801	ENSBTAG00000020984	RAPGEF4	0.043	0.099	0.664288	0.906535	0
2	24026650	24069014	ENSBTAG00000016836	PDK1	0.202	0.135	0.133614	0.501085	0
2	24091577	24179151	ENSBTAG00000017266	ITGA6	0.386	0.165	0.0214482	0.20425	0
2	24470859	24547937	ENSBTAG00000019075	METAP1D	0.064	0.129	0.619894	0.888665	0
2	24564087	24604728	ENSBTAG00000010118	HAT1	0.096	0.125	0.442487	0.805641	0
2	24637412	24736032	ENSBTAG00000016762	SLC25A12	-0.411	0.17	0.0163951	0.175834	0
2	24765631	24819628	ENSBTAG00000002646	DYNC1I2	0.009	0.207	0.965702	0.994891	0
2	24912893	24945933	ENSBTAG00000007898	CYBRD1	-0.107	0.053	0.0455003	0.304255	0
2	25003233	25029169	ENSBTAG00000007683	DCAF17	0.004	0.149	0.97846	0.99571	0
2	25029282	25113419	ENSBTAG00000016430	METTL8	0.225	0.148	0.133614	0.501085	0
2	25392971	25450609	ENSBTAG00000006918	TLK1	0.199	0.189	0.271332	0.658135	0
2	25523852	25556898	ENSBTAG00000013218	GORASP2	-0.137	0.213	0.520224	0.845505	0
2	25753839	26211202	ENSBTAG00000003626	MYO3B	0.045	0.032	0.161513	0.539421	0
2	26314651	26517652	ENSBTAG00000020296	UBR3	0.114	0.097	0.230139	0.617591	0
2	26534429	26545290	ENSBTAG00000026008	METTL5	0.122	0.133	0.359143	0.755125	0
2	26545255	26554248	ENSBTAG00000008716	SSB	0.127	0.128	0.321198	0.732618	0
2	26570154	26618014	ENSBTAG00000001093	KLHL23	-0.053	0.105	0.613559	0.885287	0
2	26613246	26618722	ENSBTAG00000001092	PHOSPHO2	-0.055	0.141	0.696537	0.916212	0
2	26618950	26643168	ENSBTAG00000001090	CCDC173	0.054	0.079	0.493975	0.835183	0
2	26648100	26689515	ENSBTAG00000027789	PPIG	0.049	0.142	0.730094	0.929867	0
2	26694016	26730287	ENSBTAG00000010743	FASTKD1	0.164	0.128	0.193601	0.577546	0
2	26753551	26774873	ENSBTAG00000010736	BBS5	0.187	0.144	0.193601	0.577546	0
2	26888630	27029783	ENSBTAG00000004555	LRP2	0.068	0.033	0.0357288	0.268394	0
2	27248579	27260964	ENSBTAG00000010048	SPC25	0.157	0.096	0.109599	0.460088	0
2	27269454	27332687	ENSBTAG00000010362	NOSTRIN	0.055	0.084	0.512468	0.841867	0
2	27359574	27712447	ENSBTAG00000044179	CERS6	-0.05	0.078	0.521523	0.845505	0
2	27870256	28191872	ENSBTAG00000017162	STK39	0.041	0.097	0.672295	0.907727	0
2	29840643	29898509	ENSBTAG00000019137	SCN7A	-0.034	0.019	0.0718606	0.378219	0
2	29996676	30088178	ENSBTAG00000002425	SCN9A	-0.065	0.05	0.193601	0.577546	0
2	30336543	30434725	ENSBTAG00000016512	TTC21B	0.135	0.139	0.331548	0.738067	0
2	30545764	30569913	ENSBTAG00000013957	GALNT3	-0.217	0.108	0.0455003	0.304255	0
2	30880623	31019443	ENSBTAG00000038180	SCN2A	-0.005	0.05	0.920344	0.984	0
2	31103231	31183473	ENSBTAG00000019385	SCN3A	0.017	0.055	0.757322	0.938655	0
2	31429997	31587069	ENSBTAG00000005501	COBLL1	-0.034	0.116	0.769522	0.9411	0
2	31681686	31810646	ENSBTAG00000019291	GRB14	0.017	0.05	0.733857	0.93175	0
2	32625453	32751507	ENSBTAG00000008704	FIGN	-0.088	0.085	0.317311	0.726324	0
2	34111730	34166890	ENSBTAG00000008142	IFIH1	0.15	0.183	0.412216	0.787186	0
2	34192288	34271400	ENSBTAG00000008140	FAP	0.144	0.085	0.0891309	0.421769	0
2	34382575	34466656	ENSBTAG00000048246	DPP4	-0.016	0.07	0.818869	0.956569	0
2	34972722	35083065	ENSBTAG00000021691	PSMD14	0.201	0.138	0.133614	0.501085	0
2	35143374	35239417	ENSBTAG00000006654	TANK	0.15	0.169	0.374541	0.765535	0
2	35855477	36075061	ENSBTAG00000005180	RBMS1	0.042	0.132	0.750485	0.936919	0
2	36097616	36247251	ENSBTAG00000009080	ITGB6	-0.073	0.053	0.161513	0.539421	0
2	36271243	36405254	ENSBTAG00000032515	PLA2R1	0.109	0.107	0.317311	0.726324	0
2	36454504	36545934	ENSBTAG00000017797	LY75	0.225	0.087	0.00932238	0.125223	0
2	36552660	36579199	ENSBTAG00000038195	CD302	0.111	0.135	0.411077	0.787186	0
2	36715262	37045806	ENSBTAG00000020654	BAZ2B	0.031	0.08	0.698016	0.916975	0
2	37061967	37131114	ENSBTAG00000004184	WDSUB1	0.333	0.19	0.0718606	0.378219	0
2	37135008	37386059	ENSBTAG00000004177	TANC1	-0.201	0.12	0.0891309	0.421769	0
2	37644721	37901601	ENSBTAG00000013773	PKP4	0.111	0.174	0.523474	0.846873	0
2	38466454	38597910	ENSBTAG00000011909	ACVR1	-0.153	0.127	0.230139	0.617591	0
2	38913867	38942113	ENSBTAG00000008329	CYTIP	0.088	0.076	0.230139	0.617591	1
2	39027224	39069644	ENSBTAG00000017376	GALNT5	0.059	0.07	0.399228	0.779537	0
2	39653910	39803015	ENSBTAG00000009770	GPD2	0.064	0.119	0.590577	0.87705	0
2	39887966	39905341	ENSBTAG00000003650	NR4A2	0.087	0.066	0.193601	0.577546	0
2	43427948	43469180	ENSBTAG00000001435	ARL6IP6	0.041	0.188	0.827429	0.956928	0
2	43470324	43528516	ENSBTAG00000048151	PRPF40A	-0.002	0.117	0.986437	0.996765	0
2	43534082	43866708	ENSBTAG00000026851	FMNL2	-0.319	0.141	0.0214482	0.20425	0
2	44006701	44053721	ENSBTAG00000001887	STAM2	0.06	0.122	0.622719	0.889381	0
2	44355896	44378831	ENSBTAG00000002293	ARL5A	0.033	0.105	0.753521	0.937935	0
2	44434401	44651653	ENSBTAG00000006907	NEB	0.124	0.071	0.0891309	0.421769	0
2	44660223	44709690	ENSBTAG00000021020	RIF1	0.099	0.085	0.230139	0.617591	0
2	44747145	44764214	ENSBTAG00000007239	TNFAIP6	0.029	0.045	0.519575	0.845505	0
2	44826000	44846258	ENSBTAG00000032369	NMI	0.101	0.125	0.419091	0.790933	0
2	44857602	44869106	ENSBTAG00000016217	RBM43	0.188	0.14	0.193601	0.577546	0
2	45698139	45719676	ENSBTAG00000039731	RND3	-0.037	0.076	0.626258	0.891107	0
2	46549089	46565933	ENSBTAG00000015962	MMADHC	-0.013	0.098	0.894193	0.977772	0
2	46624526	46753941	ENSBTAG00000047426	LYPD6	0.013	0.057	0.819646	0.956569	0
2	47212782	47368935	ENSBTAG00000018125	KIF5C	-0.001	0.042	0.980853	0.996074	0
2	47420198	47547292	ENSBTAG00000018581	EPC2	0.078	0.132	0.55452	0.862128	0
2	47698242	47756040	ENSBTAG00000019592	MBD5	0.171	0.108	0.109599	0.460088	0
2	47896215	47896544	ENSBTAG00000051947	PTMA	-0.053	0.082	0.518279	0.844611	0
2	48181494	48275918	ENSBTAG00000015291	ORC4	0.121	0.103	0.230139	0.617591	0
2	48279649	48374634	ENSBTAG00000018114	ACVR2A	0.09	0.103	0.382118	0.769076	0
2	52174189	52264474	ENSBTAG00000048810	ZEB2	-0.093	0.065	0.161513	0.539421	0
2	52388547	52825730	ENSBTAG00000001132	GTDC1	-0.179	0.153	0.230139	0.617591	0
2	52965089	53630365	ENSBTAG00000032289	ARHGAP15	0.027	0.1	0.78716	0.948265	0
2	53739155	53888583	ENSBTAG00000032277	KYNU	0.043	0.06	0.473374	0.825638	0
2	58351070	58477701	ENSBTAG00000018147	NXPH2	0.048	0.034	0.161513	0.539421	0
2	58563828	58612726	ENSBTAG00000013455	SPOPL	0.302	0.161	0.0574331	0.341833	0
2	59138783	59180569	ENSBTAG00000014432	HNMT	0.136	0.111	0.230139	0.617591	0
2	61250082	61253877	ENSBTAG00000001060	CXCR4	-0.154	0.085	0.0718606	0.378219	0
2	61489617	61524285	ENSBTAG00000015172	MCM6	-0.232	0.152	0.133614	0.501085	0
2	61588164	61617901	ENSBTAG00000015169	UBXN4	0.179	0.131	0.161513	0.539421	0
2	61636892	61799766	ENSBTAG00000013302	R3HDM1	-0.313	0.178	0.0718606	0.378219	0
2	61831040	62103607	ENSBTAG00000026842	ZRANB3	-0.038	0.13	0.770287	0.941282	0
2	62127818	62238789	ENSBTAG00000013449	RAB3GAP1	0.003	0.14	0.983246	0.996272	0
2	62271904	62313297	ENSBTAG00000014409	MAP3K19	-0.066	0.052	0.193601	0.577546	1
2	62319905	62352405	ENSBTAG00000014158	CCNT2	-0.09	0.158	0.568678	0.866614	0
2	62513122	62781938	ENSBTAG00000018753	TMEM163	-0.014	0.064	0.82665	0.956569	0
2	62784836	63181459	ENSBTAG00000018744	MGAT5	0.32	0.127	0.0124193	0.15137	0
2	64157472	64872456	ENSBTAG00000005238	NCKAP5	-0.003	0.039	0.938624	0.988038	0
2	64874976	64937074	ENSBTAG00000005234	LYPD1	-0.053	0.049	0.271332	0.658135	0
2	64935007	65196499	ENSBTAG00000047036	GPR39	-0.159	0.068	0.0214482	0.20425	0
2	65335291	65377141	ENSBTAG00000021103	SLC35F5	0.212	0.121	0.0718606	0.378219	0
2	65522494	65569993	ENSBTAG00000003401	ACTR3	-0.009	0.15	0.952156	0.992488	0
2	67391409	67756692	ENSBTAG00000005235	DPP10	0.03	0.054	0.578211	0.870625	0
2	69565219	69664403	ENSBTAG00000010221	CCDC93	-0.578	0.201	0.00373163	0.0724824	0
2	69756864	69786933	ENSBTAG00000002112	INSIG2	0.244	0.143	0.0891309	0.421769	0
2	71009555	71061343	ENSBTAG00000007111	STEAP3	-0.199	0.132	0.133614	0.501085	0
2	71107880	71192356	ENSBTAG00000010599	C2H2orf76	-0.343	0.099	0.000465258	0.0158149	0
2	71192388	71197568	ENSBTAG00000009517	DBI	0.117	0.097	0.230139	0.617591	0
2	71236196	71242268	ENSBTAG00000026825	TMEM37	-0.071	0.055	0.193601	0.577546	0
2	71480988	71482235	ENSBTAG00000009058	TMEM177	0.282	0.11	0.00932238	0.125223	0
2	71546908	71733059	ENSBTAG00000020855	PTPN4	0.195	0.107	0.0718606	0.378219	0
2	71750119	71916145	ENSBTAG00000018236	EPB41L5	0.159	0.157	0.317311	0.726324	0
2	71939113	71941225	ENSBTAG00000026829	TMEM185B	-0.287	0.147	0.0455003	0.304255	0
2	71941425	72016188	ENSBTAG00000032021	RALB	-0.15	0.171	0.380487	0.767939	0
2	72108054	72113653	ENSBTAG00000049058	INHBB	-0.068	0.05	0.161513	0.539421	0
2	72712261	72753189	ENSBTAG00000011682	GLI2	-0.033	0.055	0.548506	0.860081	0
2	72963706	73025484	ENSBTAG00000007765	TFCP2L1	-0.013	0.029	0.654153	0.903258	0
2	73071996	73306346	ENSBTAG00000019781	CLASP1	-0.14	0.16	0.381574	0.768486	0
2	73387424	73397873	ENSBTAG00000019387	NIFK	0.022	0.126	0.86108	0.967943	0
2	73398067	73416298	ENSBTAG00000006059	TSN	0.063	0.164	0.700978	0.918402	0
2	78885394	78934052	ENSBTAG00000014863	GYPC	-0.062	0.13	0.633362	0.894455	0
2	79427772	79481911	ENSBTAG00000007863	GLS	-0.094	0.125	0.452051	0.813253	0
2	79518741	79560102	ENSBTAG00000007867	STAT1	-0.125	0.16	0.434802	0.801426	0
2	79568840	79673336	ENSBTAG00000046699	STAT4	0.036	0.111	0.745938	0.935146	0
2	79795528	79994785	ENSBTAG00000011256	MYO1B	-0.123	0.121	0.317311	0.726324	0
2	80266321	80275110	ENSBTAG00000018653	NABP1	-0.012	0.132	0.927493	0.985305	0
2	80481033	80494572	ENSBTAG00000018497	CAVIN2	0.216	0.129	0.0891309	0.421769	0
2	84253392	84389538	ENSBTAG00000016782	SLC39A10	-0.029	0.103	0.777944	0.944508	1
2	84377037	84632137	ENSBTAG00000016784	DNAH7	-0.018	0.062	0.771816	0.941647	0
2	84682093	84723198	ENSBTAG00000013196	STK17B	-0.074	0.109	0.497138	0.835183	0
2	84741175	85088822	ENSBTAG00000020696	HECW2	-0.086	0.106	0.417366	0.789737	0
2	85236757	85328185	ENSBTAG00000017695	CCDC150	-0.132	0.128	0.317311	0.726324	0
2	85361038	85393083	ENSBTAG00000007779	GTF3C3	-0.085	0.15	0.570714	0.867988	0
2	85434967	85508402	ENSBTAG00000020416	PGAP1	0.021	0.056	0.70766	0.920847	0
2	85567851	85752864	ENSBTAG00000031696	ANKRD44	-0.114	0.113	0.317311	0.726324	0
2	85946152	85984071	ENSBTAG00000008915	SF3B1	-0.057	0.151	0.706174	0.92038	0
2	86007358	86024344	ENSBTAG00000004659	COQ10B	-0.06	0.1	0.548506	0.860081	0
2	86035475	86045870	ENSBTAG00000012586	HSPD1	-0.264	0.102	0.00932238	0.125223	0
2	86044912	86048062	ENSBTAG00000012589	HSPE1	-0.052	0.103	0.613559	0.885287	0
2	86060754	86090534	ENSBTAG00000019116	MOB4	-0.064	0.137	0.6405	0.89883	0
2	86102214	86178287	ENSBTAG00000007652	RFTN2	-0.014	0.094	0.881554	0.973608	0
2	86189671	86191905	ENSBTAG00000002056	MARS2	0.101	0.125	0.419091	0.790933	0
2	86319697	86686609	ENSBTAG00000007635	PLCL1	-0.036	0.067	0.591268	0.877543	0
2	87843246	88046645	ENSBTAG00000016334	SATB2	0.171	0.072	0.0163951	0.175834	0
2	88480800	88492586	ENSBTAG00000009952	C2H2orf69	0.011	0.117	0.925109	0.984568	0
2	88496394	88519396	ENSBTAG00000019232	TYW5	-0.032	0.146	0.82665	0.956569	0
2	88519695	88531251	ENSBTAG00000019231	MAIP1	-0.052	0.225	0.817315	0.956569	0
2	88832854	89024878	ENSBTAG00000016092	SPATS2L	0.688	0.114	1.97318e-09	3.17707e-07	0
2	89035588	89056404	ENSBTAG00000002272	KCTD18	0.573	0.162	0.000465258	0.0158149	0
2	89070545	89099327	ENSBTAG00000031579	SGO2	0.239	0.12	0.0455003	0.304255	0
2	89102213	89173911	ENSBTAG00000009725	AOX1	-0.417	0.053	2.78903e-15	1.13765e-12	0
2	89283574	89354608	ENSBTAG00000038878	AOX4	-0.171	0.079	0.0278069	0.233704	0
2	89366563	89441406	ENSBTAG00000026812	AOX2	0.168	0.076	0.0278069	0.233704	0
2	89470523	89485958	ENSBTAG00000006049	BZW1	-0.087	0.138	0.528695	0.848699	0
2	89504933	89512321	ENSBTAG00000005408	CLK1	-0.14	0.147	0.341097	0.743632	0
2	89519710	89530269	ENSBTAG00000005416	PPIL3	0.19	0.181	0.317311	0.726324	0
2	89532883	89547944	ENSBTAG00000018282	NIF3L1	0.19	0.206	0.356529	0.753904	0
2	89551970	89589796	ENSBTAG00000031473	ORC2	-0.031	0.17	0.855583	0.965935	0
2	89605073	89661226	ENSBTAG00000021201	FAM126B	-0.008	0.111	0.942602	0.989403	0
2	89662427	89672935	ENSBTAG00000012760	NDUFB3	-0.017	0.11	0.876821	0.971802	0
2	89703845	89757452	ENSBTAG00000010998	CFLAR	-0.074	0.169	0.661386	0.906314	0
2	89861141	89885545	ENSBTAG00000015718	CASP8	0.075	0.138	0.58713	0.875223	0
2	89938529	90008545	ENSBTAG00000014933	TRAK2	0.141	0.137	0.317311	0.726324	0
2	90008658	90040182	ENSBTAG00000019298	STRADB	0.092	0.126	0.46539	0.821076	0
2	90171834	90195668	ENSBTAG00000017437	TMEM237	-0.095	0.125	0.447255	0.810226	0
2	90248645	90296359	ENSBTAG00000007395	ALS2	-0.031	0.202	0.878398	0.972757	0
2	90571270	90573476	ENSBTAG00000002283	FZD7	0.205	0.087	0.0163951	0.175834	0
2	90611066	90737262	ENSBTAG00000034192	KIAA2012	-0.118	0.105	0.271332	0.658135	0
2	90739349	90765594	ENSBTAG00000049402	SUMO1	-0.238	0.114	0.0357288	0.268394	0
2	90787057	90810889	ENSBTAG00000005517	NOP58	-0.241	0.139	0.0891309	0.421769	0
2	90864689	91017391	ENSBTAG00000006420	BMPR2	-0.077	0.127	0.544515	0.857779	0
2	91060088	91131852	ENSBTAG00000048876	FAM117B	0.009	0.126	0.943398	0.989403	0
2	91206414	91230173	ENSBTAG00000015424	WDR12	-0.195	0.118	0.0891309	0.421769	0
2	91242784	91310808	ENSBTAG00000016000	CARF	-0.099	0.101	0.327086	0.735763	0
2	91317091	91471377	ENSBTAG00000014469	NBEAL1	-0.081	0.084	0.335046	0.739931	0
2	91483594	91527751	ENSBTAG00000000851	CYP20A1	-0.109	0.185	0.555861	0.862128	0
2	91544953	91642576	ENSBTAG00000011017	ABI2	-0.097	0.154	0.528695	0.848699	0
2	91652748	91750016	ENSBTAG00000027201	RAPH1	-0.22	0.101	0.0278069	0.233704	0
2	91906146	91939649	ENSBTAG00000007445	CD28	-0.043	0.06	0.473374	0.825638	0
2	92144569	92169924	ENSBTAG00000021596	ICOS	0.03	0.066	0.649109	0.902016	0
2	93255171	93626123	ENSBTAG00000010293	PARD3B	0.119	0.128	0.352371	0.749907	0
2	94028625	94145404	ENSBTAG00000011971	NRP2	-0.054	0.098	0.581634	0.8732	1
2	94363694	94404651	ENSBTAG00000014407	INO80D	0.12	0.119	0.317311	0.726324	0
2	94460487	94489927	ENSBTAG00000021976	NDUFS1	-0.167	0.13	0.193601	0.577546	0
2	94490094	94493400	ENSBTAG00000021979	EEF1B2	0.049	0.136	0.718847	0.926037	0
2	94507200	94552835	ENSBTAG00000017043	GPR1	-0.035	0.056	0.531971	0.849501	1
2	95031780	95064408	ENSBTAG00000016192	MDH1B	-0.14	0.07	0.0455003	0.304255	0
2	95064720	95085010	ENSBTAG00000016193	FASTKD2	-0.188	0.161	0.230139	0.617591	0
2	95370241	95469238	ENSBTAG00000044097	KLF7	0.123	0.139	0.376157	0.766533	0
2	95846071	95897815	ENSBTAG00000005474	CREB1	0.083	0.088	0.345681	0.746447	0
2	95910212	95920426	ENSBTAG00000052083	METTL21A	-0.17	0.144	0.230139	0.617591	0
2	95992566	96027482	ENSBTAG00000016297	CCNYL1	-0.021	0.13	0.871306	0.969988	0
2	96039164	96040921	ENSBTAG00000020957	FZD5	0.014	0.075	0.851661	0.965247	0
2	96101252	96318495	ENSBTAG00000007830	PLEKHM3	0.207	0.129	0.109599	0.460088	0
2	96437069	96460618	ENSBTAG00000012888	C2H2orf80	-0.083	0.052	0.109599	0.460088	0
2	96510261	96532002	ENSBTAG00000020527	IDH1	-0.111	0.087	0.193601	0.577546	0
2	96557844	96625577	ENSBTAG00000002177	PIKFYVE	0.053	0.105	0.613559	0.885287	0
2	97414229	97562142	ENSBTAG00000018130	MAP2	-0.026	0.118	0.825871	0.956569	0
2	97826470	97847706	ENSBTAG00000054647	RPE	-0.091	0.126	0.470294	0.824734	0
2	97848310	97972682	ENSBTAG00000021600	KANSL1L	0.059	0.082	0.471525	0.825	0
2	97989116	98029245	ENSBTAG00000010579	ACADL	-0.097	0.096	0.317311	0.726324	0
2	98188212	98237653	ENSBTAG00000015066	LANCL1	0.222	0.224	0.321686	0.733184	0
2	99223775	99801312	ENSBTAG00000012647	ERBB4	0.061	0.077	0.428361	0.795908	0
2	101012199	101190609	ENSBTAG00000037804	IKZF2	0.072	0.075	0.337055	0.741466	0
2	102760020	102854286	ENSBTAG00000033690	BARD1	0.085	0.104	0.413928	0.78861	0
2	103327789	103350913	ENSBTAG00000019274	ATIC	-0.623	0.154	6.33425e-05	0.00324319	0
2	103361566	103431472	ENSBTAG00000008300	FN1	-0.058	0.048	0.230139	0.617591	0
2	103970393	104038722	ENSBTAG00000013215	MREG	-0.043	0.047	0.360192	0.756551	0
2	104067181	104128350	ENSBTAG00000010413	TMEM169	-0.033	0.07	0.637641	0.89739	0
2	104068554	104116082	ENSBTAG00000006821	PECR	-0.007	0.083	0.933056	0.986505	0
2	104134456	104223320	ENSBTAG00000010426	XRCC5	0.069	0.117	0.555191	0.862128	1
2	104423001	104474279	ENSBTAG00000003843	SMARCAL1	-0.062	0.119	0.602367	0.880559	0
2	104486567	104489680	ENSBTAG00000051254	RPL37A	0.039	0.109	0.720343	0.92661	0
2	104619851	104649017	ENSBTAG00000005596	IGFBP2	0.059	0.044	0.193601	0.577546	0
2	104659123	104680014	ENSBTAG00000054218	IGFBP5	-0.042	0.072	0.559893	0.862899	0
2	105902088	106118422	ENSBTAG00000002485	TNS1	-0.022	0.066	0.739134	0.933704	0
2	106185020	106192570	ENSBTAG00000038042	CXCR2	0.004	0.04	0.920344	0.984	0
2	106256621	106284396	ENSBTAG00000010386	ARPC2	-0.093	0.179	0.603064	0.880947	0
2	106293589	106298509	ENSBTAG00000003927	AAMP	-0.08	0.18	0.657043	0.904616	0
2	106298904	106301390	ENSBTAG00000051631	PNKD	0.056	0.117	0.631939	0.893786	0
2	106302074	106319619	ENSBTAG00000003935	TMBIM1	0.017	0.167	0.918757	0.984	0
2	106392590	106403650	ENSBTAG00000015520	SLC11A1	0.026	0.053	0.623426	0.889768	0
2	106408440	106413567	ENSBTAG00000008362	CTDSP1	0.221	0.173	0.193601	0.577546	0
2	106447346	106532901	ENSBTAG00000016572	USP37	0.012	0.12	0.920344	0.984	0
2	106532969	106566527	ENSBTAG00000003807	CNOT9	-0.234	0.258	0.364407	0.759667	0
2	106575924	106598631	ENSBTAG00000003809	PLCD4	-0.276	0.102	0.00693395	0.103603	0
2	106598789	106618772	ENSBTAG00000026772	ZNF142	-0.061	0.076	0.421975	0.792952	0
2	106619142	106623100	ENSBTAG00000003813	BCS1L	0.2	0.141	0.161513	0.539421	0
2	106623552	106632884	ENSBTAG00000003817	RNF25	-0.105	0.186	0.572074	0.868976	0
2	106633221	106659569	ENSBTAG00000003819	STK36	-0.108	0.098	0.271332	0.658135	0
2	106656154	106706020	ENSBTAG00000018415	TTLL4	0.037	0.146	0.800268	0.952615	0
2	106739389	106782307	ENSBTAG00000013489	CYP27A1	-0.12	0.128	0.348244	0.746447	0
2	106786779	106794751	ENSBTAG00000013492	PRKAG3	-0.116	0.054	0.0357288	0.268394	0
2	106822087	106835094	ENSBTAG00000013990	WNT6	-0.051	0.042	0.230139	0.617591	0
2	106842324	106855593	ENSBTAG00000009217	WNT10A	-0.038	0.043	0.376696	0.766738	0
2	107020701	107112857	ENSBTAG00000031041	NHEJ1	0.223	0.108	0.0357288	0.268394	0
2	107113751	107120309	ENSBTAG00000012618	SLC23A3	-0.061	0.06	0.317311	0.726324	0
2	107122933	107126587	ENSBTAG00000012619	CNPPD1	-0.058	0.129	0.65271	0.9031	0
2	107128001	107133526	ENSBTAG00000012620	RETREG2	-0.117	0.184	0.524776	0.847524	0
2	107158435	107162015	ENSBTAG00000020606	ZFAND2B	0.061	0.23	0.791009	0.950283	0
2	107162129	107169762	ENSBTAG00000020607	ABCB6	-0.489	0.165	0.0026998	0.0575565	0
2	107170269	107179679	ENSBTAG00000020608	ATG9A	-0.101	0.128	0.430112	0.797708	0
2	107179983	107186463	ENSBTAG00000020610	ANKZF1	-0.326	0.226	0.161513	0.539421	0
2	107186405	107194793	ENSBTAG00000020611	GLB1L	-0.237	0.142	0.0891309	0.421769	0
2	107194871	107198250	ENSBTAG00000020613	STK16	-0.146	0.185	0.430112	0.797708	0
2	107196605	107203963	ENSBTAG00000030974	TUBA4A	-0.211	0.128	0.109599	0.460088	0
2	107214372	107220493	ENSBTAG00000030973	TUBA1D	-0.079	0.059	0.193601	0.577546	0
2	107227555	107234943	ENSBTAG00000013782	DNAJB2	-0.132	0.142	0.352371	0.749907	0
2	107307884	107321008	ENSBTAG00000021514	DNPEP	-0.575	0.178	0.00137428	0.0356293	0
2	107351796	107358964	ENSBTAG00000005353	DES	0.047	0.037	0.193601	0.577546	0
2	107365755	107423369	ENSBTAG00000046176	SPEG	-0.038	0.071	0.59265	0.877678	1
2	107429346	107436451	ENSBTAG00000002995	GMPPA	0.029	0.165	0.860294	0.967682	0
2	107462147	107472033	ENSBTAG00000020539	CHPF	-0.204	0.103	0.0455003	0.304255	0
2	107478709	107500811	ENSBTAG00000040338	OBSL1	-0.107	0.081	0.193601	0.577546	0
2	107521189	107535476	ENSBTAG00000038992	STK11IP	-0.238	0.128	0.0574331	0.341833	0
2	107548385	107563336	ENSBTAG00000014975	SLC4A3	-0.091	0.059	0.133614	0.501085	0
2	109525497	109678039	ENSBTAG00000010030	EPHA4	0.031	0.067	0.643364	0.900063	0
2	110589561	110734612	ENSBTAG00000046649	SGPP2	0.036	0.103	0.726339	0.92866	0
2	110746220	110820175	ENSBTAG00000011649	FARSB	0.109	0.17	0.521523	0.845505	0
2	111037664	111113602	ENSBTAG00000017258	ACSL3	0.12	0.123	0.329064	0.737502	0
2	111212142	111215329	ENSBTAG00000006432	KCNE4	0.026	0.069	0.706174	0.92038	0
2	111898333	111965169	ENSBTAG00000011133	AP1S3	0.014	0.133	0.916376	0.983485	0
2	112010456	112064142	ENSBTAG00000016951	WDFY1	0.339	0.233	0.133614	0.501085	0
2	112068965	112076912	ENSBTAG00000011514	MRPL44	0.042	0.139	0.762652	0.939451	1
2	112087760	112158159	ENSBTAG00000008717	SERPINE2	-0.023	0.069	0.739134	0.933704	0
2	112489090	112502288	ENSBTAG00000038700	FAM124B	-0.124	0.069	0.0718606	0.378219	1
2	112586826	112699754	ENSBTAG00000021769	CUL3	-0.135	0.2	0.499676	0.83669	0
2	112861987	113100311	ENSBTAG00000000581	DOCK10	-0.054	0.108	0.617075	0.886181	0
2	114988515	115174824	ENSBTAG00000021308	IRS1	0.142	0.109	0.193601	0.577546	0
2	115024497	115208409	ENSBTAG00000023963	RHBDD1	-0.01	0.134	0.940215	0.988352	0
2	115486532	115514827	ENSBTAG00000021319	MFF	-0.388	0.191	0.0455003	0.304255	0
2	115629949	115704725	ENSBTAG00000021323	AGFG1	-0.26	0.146	0.0718606	0.378219	0
2	116086973	116277103	ENSBTAG00000021328	SPHKAP	0.016	0.049	0.743668	0.935146	0
2	117023746	117290403	ENSBTAG00000037640	PID1	-0.28	0.11	0.0124193	0.15137	0
2	117379818	117771065	ENSBTAG00000016063	DNER	-0.002	0.023	0.930672	0.98637	0
2	117785379	117787180	ENSBTAG00000039046	CD24	-0.055	0.075	0.463558	0.820209	0
2	117811397	117918447	ENSBTAG00000021653	TRIP12	0.228	0.212	0.271332	0.658135	0
2	117962254	118069148	ENSBTAG00000010338	FBXO36	-0.094	0.069	0.161513	0.539421	0
2	118076301	118099221	ENSBTAG00000010344	SLC16A14	0.013	0.077	0.865797	0.968696	0
2	118183281	118232898	ENSBTAG00000015752	SP110	0.028	0.15	0.851661	0.965247	0
2	118362310	118396685	ENSBTAG00000037702	SP140L	0.029	0.087	0.739134	0.933704	0
2	118530388	118632791	ENSBTAG00000040055	CAB39	-0.123	0.168	0.464169	0.821051	0
2	118666034	118680136	ENSBTAG00000017855	ITM2C	-0.304	0.1	0.0026998	0.0575565	0
2	118714413	118715459	ENSBTAG00000017431	GPR55	0.123	0.054	0.0214482	0.20425	0
2	118803760	118824701	ENSBTAG00000030718	SPATA3	-0.055	0.04	0.161513	0.539421	0
2	118846915	118854132	ENSBTAG00000026710	C2H2orf72	0.006	0.074	0.935442	0.987224	0
2	118865174	118946608	ENSBTAG00000005119	PSMD1	-0.199	0.15	0.193601	0.577546	0
2	118894087	118909985	ENSBTAG00000039772	HTR2B	-0.018	0.05	0.718847	0.926037	0
2	118967305	119146003	ENSBTAG00000018502	ARMC9	0.38	0.126	0.0026998	0.0575565	0
2	119226977	119236929	ENSBTAG00000016174	NCL	-0.135	0.105	0.193601	0.577546	0
2	119442706	119498775	ENSBTAG00000019480	PDE6D	0.119	0.105	0.271332	0.658135	0
2	119504023	119527187	ENSBTAG00000005207	COPS7B	0.353	0.144	0.0124193	0.15137	0
2	119630438	119987217	ENSBTAG00000011964	DIS3L2	0.184	0.145	0.193601	0.577546	0
2	120187397	120218347	ENSBTAG00000010598	EIF4E2	-0.04	0.213	0.850877	0.965247	0
2	120344483	120393885	ENSBTAG00000004603	PHC2	0.264	0.144	0.0718606	0.378219	1
2	120410028	120436409	ENSBTAG00000012629	ZNF362	0.211	0.087	0.0163951	0.175834	0
2	120514777	120551870	ENSBTAG00000020671	TRIM62	0.226	0.093	0.0163951	0.175834	0
2	120653448	120677193	ENSBTAG00000017605	AK2	-0.102	0.13	0.432454	0.800111	0
2	120719524	120743308	ENSBTAG00000008330	RNF19B	-0.066	0.131	0.614261	0.885779	0
2	120815271	120849384	ENSBTAG00000018067	S100PBP	-0.067	0.231	0.771816	0.941647	0
2	120883700	120910058	ENSBTAG00000018062	KIAA1522	0.091	0.071	0.193601	0.577546	0
2	120951772	120969740	ENSBTAG00000026684	SYNC	-0.004	0.143	0.977662	0.99571	0
2	120969745	120986234	ENSBTAG00000005904	RBBP4	-0.251	0.19	0.193601	0.577546	0
2	120987011	120998937	ENSBTAG00000027159	ZBTB8OS	-0.317	0.218	0.133614	0.501085	0
2	121015835	121076671	ENSBTAG00000018199	ZBTB8A	0.136	0.099	0.161513	0.539421	0
2	121176081	121199884	ENSBTAG00000020655	BSDC1	-0.021	0.216	0.922726	0.984	0
2	121199686	121201566	ENSBTAG00000020652	TSSK3	0.198	0.158	0.193601	0.577546	0
2	121201977	121202927	ENSBTAG00000037902	FAM229A	0.104	0.062	0.0891309	0.421769	0
2	121223027	121225422	ENSBTAG00000046862	MARCKSL1	0.011	0.085	0.897358	0.979122	0
2	121225584	121257548	ENSBTAG00000012698	HDAC1	0.178	0.195	0.361243	0.757653	0
2	121262594	121283528	ENSBTAG00000012695	LCK	0.18	0.117	0.133614	0.501085	0
2	121291040	121298203	ENSBTAG00000014390	MTMR9	0.253	0.109	0.0214482	0.20425	0
2	121298262	121306107	ENSBTAG00000014388	EIF3I	0.027	0.17	0.873669	0.970681	0
2	121306084	121311470	ENSBTAG00000009163	TMEM234	-0.027	0.172	0.875245	0.971286	0
2	121311608	121316192	ENSBTAG00000026696	DCDC2B	0.102	0.063	0.109599	0.460088	0
2	121316668	121320573	ENSBTAG00000015103	IQCC	0.046	0.176	0.794093	0.950992	0
2	121319922	121324082	ENSBTAG00000015104	CCDC28B	-0.218	0.129	0.0891309	0.421769	0
2	121402133	121416389	ENSBTAG00000019486	CLDN12	0.11	0.103	0.271332	0.658135	0
2	121807999	121817752	ENSBTAG00000039121	PTP4A2	-0.322	0.129	0.0124193	0.15137	0
2	122014154	122068417	ENSBTAG00000010050	COL16A1	0.066	0.079	0.403718	0.782435	0
2	122077521	122095612	ENSBTAG00000010378	PEF1	0.044	0.198	0.824314	0.956569	0
2	122097791	122108116	ENSBTAG00000010366	HCRTR1	0.015	0.067	0.822757	0.956569	0
2	122142699	122178659	ENSBTAG00000013235	TINAGL1	0.063	0.109	0.563264	0.864392	0
2	122233162	122259028	ENSBTAG00000035081	SERINC2	0.019	0.073	0.794864	0.950992	0
2	122285620	122294666	ENSBTAG00000016819	FABP3	-0.139	0.059	0.0163951	0.175834	0
2	122295337	122347439	ENSBTAG00000016818	ZCCHC17	-0.26	0.088	0.0026998	0.0575565	0
2	122347180	122372981	ENSBTAG00000016817	SNRNP40	-0.475	0.217	0.0278069	0.233704	0
2	122527753	122653986	ENSBTAG00000018979	PUM1	-0.003	0.178	0.986437	0.996765	0
2	122666044	122705716	ENSBTAG00000026676	SDC3	0.081	0.077	0.271332	0.658135	0
2	122807359	122833480	ENSBTAG00000005477	LAPTM5	0.099	0.101	0.327086	0.735763	0
2	124237184	124325673	ENSBTAG00000012848	PTPRU	-0.151	0.071	0.0357288	0.268394	0
2	124332402	124368606	ENSBTAG00000017253	MECR	-0.021	0.143	0.883132	0.97412	0
2	124374950	124400699	ENSBTAG00000013309	SRSF4	-0.096	0.236	0.684008	0.911291	0
2	124425343	124429820	ENSBTAG00000047524	TMEM200B	0.233	0.127	0.0718606	0.378219	0
2	124431682	124610867	ENSBTAG00000006667	EPB41	-0.105	0.182	0.563939	0.864453	0
2	124710421	124740398	ENSBTAG00000015771	YTHDF2	-0.184	0.219	0.400908	0.781321	0
2	124758268	124785888	ENSBTAG00000001160	GMEB1	-0.089	0.271	0.742912	0.934808	0
2	124810107	124834049	ENSBTAG00000026660	TAF12	0.134	0.208	0.519575	0.845505	0
2	124855242	124878660	ENSBTAG00000010393	TRNAU1AP	0.961	0.23	2.66915e-05	0.00164962	0
2	124883384	124903231	ENSBTAG00000003788	RCC1	0.228	0.129	0.0718606	0.378219	0
2	124922940	125007155	ENSBTAG00000002727	PHACTR4	-0.002	0.151	0.989628	0.997782	0
2	125068641	125074216	ENSBTAG00000002678	MED18	0.197	0.175	0.271332	0.658135	0
2	125113996	125132377	ENSBTAG00000002363	SESN2	0.035	0.07	0.617075	0.886181	0
2	125145420	125147786	ENSBTAG00000006342	ATP5IF1	0.122	0.144	0.396995	0.77903	0
2	125150751	125171158	ENSBTAG00000018385	DNAJC8	0.123	0.183	0.501584	0.837478	0
2	125201951	125229055	ENSBTAG00000027051	PTAFR	-0.02	0.088	0.820424	0.956569	0
2	125249517	125390286	ENSBTAG00000043989	EYA3	-0.807	0.249	0.00137428	0.0356293	0
2	125392642	125400258	ENSBTAG00000008800	XKR8	-0.177	0.108	0.109599	0.460088	0
2	125448288	125470852	ENSBTAG00000006225	RPA2	0.182	0.235	0.438931	0.802991	0
2	125473679	125486124	ENSBTAG00000006223	THEMIS2	-0.04	0.103	0.698016	0.916975	0
2	125526927	125545896	ENSBTAG00000003866	PPP1R8	-0.097	0.141	0.491453	0.833644	0
2	125550304	125585869	ENSBTAG00000001192	STX12	-0.226	0.181	0.230139	0.617591	0
2	125604197	125635148	ENSBTAG00000019614	FAM76A	0.322	0.182	0.0718606	0.378219	0
2	125662055	125665793	ENSBTAG00000007554	IFI6	0.052	0.059	0.378318	0.767232	0
2	125688547	125709381	ENSBTAG00000011784	FGR	-0.001	0.057	0.985639	0.996765	0
2	125759503	125780816	ENSBTAG00000037456	AHDC1	-0.001	0.056	0.985639	0.996765	0
2	125814828	125890887	ENSBTAG00000018374	WASF2	-0.131	0.095	0.161513	0.539421	0
2	125921162	125934238	ENSBTAG00000010254	MAP3K6	-0.112	0.08	0.161513	0.539421	0
2	125934205	125940846	ENSBTAG00000010253	SYTL1	-0.134	0.098	0.161513	0.539421	0
2	125946146	125956940	ENSBTAG00000010249	TMEM222	-0.202	0.155	0.193601	0.577546	0
2	125970802	126036698	ENSBTAG00000053588	WDTC1	-0.4	0.133	0.0026998	0.0575565	0
2	126090279	126142300	ENSBTAG00000008766	SLC9A1	-0.076	0.063	0.230139	0.617591	0
2	126257409	126270759	ENSBTAG00000019252	KDF1	-0.139	0.124	0.271332	0.658135	0
2	126273255	126286771	ENSBTAG00000004416	NUDC	-0.391	0.165	0.0163951	0.175834	0
2	126314664	126321490	ENSBTAG00000014849	GPATCH3	-0.184	0.215	0.391998	0.775065	0
2	126320997	126333342	ENSBTAG00000014850	GPN2	-0.176	0.175	0.317311	0.726324	0
2	126340193	126341536	ENSBTAG00000009223	SFN	-0.037	0.045	0.411077	0.787186	0
2	126349905	126374294	ENSBTAG00000046672	ZDHHC18	-0.089	0.089	0.317311	0.726324	0
2	126392028	126402241	ENSBTAG00000009796	PIGV	0.518	0.111	2.60161e-06	0.000218055	0
2	126408497	126477461	ENSBTAG00000001024	ARID1A	-0.082	0.102	0.421397	0.792475	0
2	126574904	126612862	ENSBTAG00000014447	RPS6KA1	-0.192	0.104	0.0718606	0.378219	0
2	126666827	126704429	ENSBTAG00000003235	DHDDS	-0.036	0.227	0.873669	0.970681	0
2	126764040	126771731	ENSBTAG00000009631	ZNF683	-0.018	0.061	0.767994	0.940729	0
2	126775472	126806913	ENSBTAG00000005629	CRYBG2	0.072	0.053	0.161513	0.539421	0
2	126804336	126806114	ENSBTAG00000005628	CD52	-0.119	0.104	0.271332	0.658135	0
2	126814237	126836894	ENSBTAG00000009581	UBXN11	0.088	0.106	0.406539	0.7843	0
2	126837552	126839005	ENSBTAG00000009580	SH3BGRL3	-0.088	0.107	0.411077	0.787186	0
2	126841741	126876537	ENSBTAG00000009579	CEP85	0.311	0.129	0.0163951	0.175834	0
2	126911248	126923367	ENSBTAG00000019399	CNKSR1	0.04	0.11	0.715858	0.925217	0
2	126929533	126930613	ENSBTAG00000009562	ZNF593	-0.143	0.093	0.133614	0.501085	0
2	126936277	126939832	ENSBTAG00000013131	FAM110D	-0.033	0.09	0.713619	0.924471	0
2	126966876	126975053	ENSBTAG00000001513	PDIK1L	-0.088	0.104	0.397553	0.779124	0
2	127042911	127050544	ENSBTAG00000006355	SLC30A2	-0.131	0.067	0.0455003	0.304255	0
2	127052889	127070881	ENSBTAG00000006349	EXTL1	0.028	0.048	0.559893	0.862899	1
2	127089778	127125126	ENSBTAG00000005105	PAFAH2	-0.058	0.139	0.676678	0.908948	0
2	127152813	127183806	ENSBTAG00000013761	STMN1	0.015	0.064	0.814985	0.956569	0
2	127217390	127222938	ENSBTAG00000021787	PAQR7	-0.016	0.051	0.753521	0.937935	0
2	127225459	127237892	ENSBTAG00000021786	AUNIP	-0.095	0.108	0.378859	0.767439	0
2	127238786	127253787	ENSBTAG00000021781	MTFR1L	0.33	0.289	0.271332	0.658135	0
2	127256063	127272993	ENSBTAG00000021778	SELENON	-0.049	0.063	0.436569	0.801665	0
2	127292652	127444339	ENSBTAG00000003069	MAN1C1	-0.239	0.085	0.00511026	0.0879525	0
2	127482749	127508799	ENSBTAG00000001050	LDLRAP1	-0.072	0.111	0.516338	0.843808	0
2	127542968	127609384	ENSBTAG00000002988	MACO1	-0.179	0.174	0.317311	0.726324	0
2	127661915	127677708	ENSBTAG00000001296	TMEM50A	-0.249	0.178	0.161513	0.539421	0
2	127708588	127712696	ENSBTAG00000015222	RSRP1	-0.06	0.154	0.696537	0.916212	0
2	127725940	127731258	ENSBTAG00000001651	SYF2	-0.122	0.134	0.362823	0.758561	0
2	127998304	128061752	ENSBTAG00000050474	RUNX3	0.01	0.07	0.88629	0.974441	0
2	128114762	128188876	ENSBTAG00000009470	CLIC4	-0.012	0.181	0.947378	0.990437	0
2	128253260	128282672	ENSBTAG00000013772	SRRM1	0.296	0.153	0.0574331	0.341833	0
2	128388785	128422500	ENSBTAG00000017452	RCAN3	0.02	0.127	0.875245	0.971286	0
2	128445501	128496459	ENSBTAG00000013048	NIPAL3	-0.077	0.078	0.323643	0.73409	0
2	128563987	128600189	ENSBTAG00000019791	GRHL3	-0.114	0.082	0.161513	0.539421	0
2	128718562	128742668	ENSBTAG00000001101	IFNLR1	-0.012	0.051	0.814209	0.956569	0
2	128924106	128936367	ENSBTAG00000008072	SRSF10	0.055	0.176	0.755041	0.938568	0
2	128938566	128942609	ENSBTAG00000030435	PNRC2	-0.012	0.189	0.949767	0.991663	0
2	129056428	129079502	ENSBTAG00000030434	FUCA1	-0.33	0.154	0.0357288	0.268394	0
2	129091481	129110145	ENSBTAG00000021832	HMGCL	-0.271	0.152	0.0718606	0.378219	0
2	129111017	129115576	ENSBTAG00000005002	GALE	-0.176	0.112	0.109599	0.460088	0
2	129115781	129121108	ENSBTAG00000011625	LYPLA2	-0.41	0.167	0.0124193	0.15137	1
2	129122974	129130667	ENSBTAG00000021620	PITHD1	-0.51	0.21	0.0163951	0.175834	0
2	129147034	129156032	ENSBTAG00000026585	ELOA	-0.121	0.174	0.487055	0.832557	0
2	129168191	129198058	ENSBTAG00000020905	RPL11	-0.563	0.156	0.000318217	0.0118359	0
2	129296772	129298371	ENSBTAG00000030425	ID3	0.015	0.096	0.876033	0.971802	0
2	129326862	129343702	ENSBTAG00000014400	E2F2	-0.015	0.043	0.727089	0.928843	0
2	129367152	129417868	ENSBTAG00000012263	ASAP3	0.157	0.116	0.161513	0.539421	0
2	129421761	129471183	ENSBTAG00000038865	TCEA3	0.06	0.039	0.133614	0.501085	0
2	129478393	129483457	ENSBTAG00000002594	ZNF436	0.197	0.174	0.271332	0.658135	0
2	129500051	129531646	ENSBTAG00000016578	HNRNPR	0.162	0.187	0.38649	0.77153	0
2	129672631	129764693	ENSBTAG00000009502	LUZP1	0.047	0.119	0.692843	0.915177	0
2	129770258	129836290	ENSBTAG00000009500	KDM1A	0.032	0.316	0.91955	0.984	0
2	129898024	130038309	ENSBTAG00000045902	EPHB2	-0.034	0.056	0.543851	0.857285	0
2	130166509	130173608	ENSBTAG00000011196	C1QB	-0.216	0.1	0.0278069	0.233704	0
2	130181311	130185682	ENSBTAG00000011193	C1QC	-0.224	0.087	0.00932238	0.125223	0
2	130189849	130193588	ENSBTAG00000007153	C1QA	-0.297	0.089	0.000966848	0.0273241	0
2	130297461	130333090	ENSBTAG00000016448	ZBTB40	-0.068	0.138	0.622013	0.889202	0
2	130696821	130711436	ENSBTAG00000051083	WNT4	0.156	0.074	0.0357288	0.268394	0
2	130732620	130787969	ENSBTAG00000001700	CDC42	-0.168	0.131	0.193601	0.577546	0
2	130906818	130976365	ENSBTAG00000017122	HSPG2	0.097	0.059	0.109599	0.460088	0
2	131012510	131085750	ENSBTAG00000006940	USP48	0.221	0.206	0.271332	0.658135	0
2	131095681	131165889	ENSBTAG00000008952	RAP1GAP	0.292	0.102	0.00373163	0.0724824	0
2	131181416	131245100	ENSBTAG00000008951	ALPL	0.177	0.078	0.0214482	0.20425	0
2	131324608	131449347	ENSBTAG00000002977	ECE1	0.069	0.118	0.558548	0.862128	0
2	131485408	131837484	ENSBTAG00000040215	EIF4G3	-0.099	0.213	0.641931	0.899601	0
2	131855266	131891998	ENSBTAG00000018656	HP1BP3	0.013	0.294	0.964904	0.994891	0
2	131971819	131985982	ENSBTAG00000006085	DDOST	-0.156	0.148	0.271332	0.658135	0
2	131986298	132006686	ENSBTAG00000006084	PINK1	-0.379	0.191	0.0455003	0.304255	0
2	132115901	132123552	ENSBTAG00000020850	MUL1	0.089	0.159	0.575479	0.869722	0
2	132136807	132139923	ENSBTAG00000009156	CAMK2N1	0.042	0.065	0.518279	0.844611	0
2	132630420	132665213	ENSBTAG00000039122	PLA2G5	-0.069	0.036	0.0574331	0.341833	0
2	132802975	132831792	ENSBTAG00000017108	OTUD3	0.279	0.239	0.230139	0.617591	0
2	132915932	133020007	ENSBTAG00000007998	TMCO4	-0.044	0.118	0.709148	0.921803	0
2	133201115	133340081	ENSBTAG00000004554	CAPZB	-0.127	0.158	0.421397	0.792475	0
2	133363649	133369985	ENSBTAG00000012289	AKR7A2	-0.317	0.107	0.0026998	0.0575565	0
2	133405836	133411304	ENSBTAG00000011951	MRTO4	-0.09	0.153	0.556532	0.862128	0
2	133406871	133434408	ENSBTAG00000011950	EMC1	-0.085	0.142	0.549173	0.860906	0
2	133452143	133589435	ENSBTAG00000015240	UBR4	0.084	0.102	0.40994	0.786768	0
2	133705999	133751262	ENSBTAG00000030340	IFFO2	-0.118	0.108	0.271332	0.658135	0
2	133756949	133790322	ENSBTAG00000030335	ALDH4A1	-0.087	0.074	0.230139	0.617591	0
2	134156462	134190663	ENSBTAG00000030322	KLHDC7A	-0.128	0.108	0.230139	0.617591	0
2	134985221	135154958	ENSBTAG00000000684	ARHGEF10L	-0.003	0.077	0.96889	0.994891	0
2	135211439	135237283	ENSBTAG00000008579	RCC2	0.002	0.129	0.987234	0.996765	0
2	135473410	135527194	ENSBTAG00000003403	PADI2	-0.024	0.055	0.662837	0.906535	0
2	135548907	135578120	ENSBTAG00000008314	SDHB	0.041	0.138	0.766467	0.940087	0
2	135586322	135606413	ENSBTAG00000008309	ATP13A2	-0.07	0.083	0.399228	0.779537	0
2	135611507	135616267	ENSBTAG00000003832	MFAP2	-0.038	0.065	0.558548	0.862128	0
2	135617021	135668617	ENSBTAG00000003822	CROCC	0.003	0.08	0.969688	0.994891	0
2	135674410	135688455	ENSBTAG00000013282	NECAP2	-0.55	0.17	0.00137428	0.0356293	0
2	135738977	135759581	ENSBTAG00000009251	SZRD1	-0.37	0.259	0.161513	0.539421	1
2	135783522	135863766	ENSBTAG00000008510	FBXO42	-0.097	0.108	0.369186	0.762228	0
2	135877622	135881588	ENSBTAG00000014221	CPLANE2	-0.091	0.131	0.487055	0.832557	0
2	135893247	135911229	ENSBTAG00000005670	ARHGEF19	-0.003	0.056	0.956935	0.992795	0
2	135934234	135972074	ENSBTAG00000000815	EPHA2	-0.033	0.068	0.627676	0.89175	0
3	234607	260894	ENSBTAG00000002952	TBX19	0.223	0.081	0.00511026	0.0879525	0
3	310346	330047	ENSBTAG00000037819	SFT2D2	0.052	0.099	0.599583	0.880311	0
3	386406	455451	ENSBTAG00000005393	TIPRL	0.171	0.143	0.230139	0.617591	0
3	507209	561418	ENSBTAG00000000616	GPR161	0.11	0.104	0.271332	0.658135	0
3	572630	752300	ENSBTAG00000020969	DCAF6	0.025	0.126	0.843045	0.962076	0
3	752398	783103	ENSBTAG00000020968	MPC2	-0.054	0.081	0.504772	0.837772	0
3	809356	843304	ENSBTAG00000001052	ADCY10	-0.127	0.043	0.0026998	0.0575565	0
3	915375	997233	ENSBTAG00000002823	MPZL1	0.779	0.135	6.63149e-09	9.66066e-07	1
3	1011191	1083046	ENSBTAG00000014151	RCSD1	0.31	0.189	0.109599	0.460088	0
3	1148816	1160249	ENSBTAG00000008931	CREG1	0.222	0.068	0.000966848	0.0273241	0
3	1182748	1266862	ENSBTAG00000012700	CD247	-0.212	0.139	0.133614	0.501085	0
3	1280068	1481060	ENSBTAG00000024534	POU2F1	0.166	0.143	0.230139	0.617591	0
3	1675900	1728605	ENSBTAG00000009148	GPA33	-0.015	0.022	0.495239	0.835183	0
3	1903037	1970272	ENSBTAG00000019497	ILDR2	0.149	0.055	0.00693395	0.103603	0
3	2034404	2050406	ENSBTAG00000010456	TADA1	0.007	0.277	0.980055	0.996074	0
3	2051963	2069922	ENSBTAG00000010775	POGK	-0.113	0.251	0.65271	0.9031	0
3	2984979	3059465	ENSBTAG00000044150	UCK2	-0.204	0.096	0.0357288	0.268394	0
3	3105832	3191071	ENSBTAG00000010009	TMCO1	0.121	0.129	0.348244	0.746447	0
3	3220577	3249677	ENSBTAG00000017852	ALDH9A1	-0.263	0.132	0.0455003	0.304255	0
3	3264993	3288716	ENSBTAG00000010265	MGST3	-0.017	0.164	0.917169	0.983732	0
3	4147294	4246502	ENSBTAG00000013801	PBX1	-0.141	0.118	0.230139	0.617591	0
3	5960360	5998691	ENSBTAG00000007247	NUF2	0.025	0.065	0.700237	0.917922	0
3	6159079	6212125	ENSBTAG00000016341	RGS5	0.239	0.122	0.0455003	0.304255	0
3	6290852	6298224	ENSBTAG00000046277	RGS4	-0.044	0.043	0.317311	0.726324	0
3	6634642	6664654	ENSBTAG00000005976	HSD17B7	-0.029	0.09	0.747453	0.935616	0
3	6677596	6853843	ENSBTAG00000004885	DDR2	0.002	0.081	0.980055	0.996074	0
3	6906319	6938634	ENSBTAG00000010206	UAP1	-0.074	0.121	0.540538	0.855368	0
3	6980659	7000320	ENSBTAG00000012694	UHMK1	-0.017	0.058	0.769522	0.9411	0
3	7067271	7094798	ENSBTAG00000054194	SH2D1B	0.033	0.107	0.758082	0.938933	0
3	7107837	7126810	ENSBTAG00000050790	C3H1orf226	0.105	0.058	0.0718606	0.378219	0
3	7117209	7119975	ENSBTAG00000010174	SPATA46	0.077	0.045	0.0891309	0.421769	0
3	7135834	7264277	ENSBTAG00000010158	NOS1AP	0.088	0.063	0.161513	0.539421	0
3	7530483	7580220	ENSBTAG00000034147	OLFML2B	0.024	0.045	0.594034	0.878133	0
3	7599092	7846132	ENSBTAG00000005227	ATF6	-0.165	0.176	0.348244	0.746447	0
3	7851912	7861112	ENSBTAG00000021754	DUSP12	-0.331	0.187	0.0718606	0.378219	0
3	7931201	7947765	ENSBTAG00000021842	FCGR2B	0.426	0.111	0.000144696	0.00643871	0
3	8000299	8008181	ENSBTAG00000002096	FCGR3A	-0.021	0.096	0.82665	0.956569	0
3	8031683	8034120	ENSBTAG00000039035	HSPA6	-0.061	0.077	0.428361	0.795908	0
3	8035858	8044343	ENSBTAG00000038124	FCGR2A	-0.12	0.13	0.356007	0.753322	0
3	8143059	8175606	ENSBTAG00000015856	CFAP126	-1.4	0.225	5.64632e-10	9.87057e-08	0
3	8177617	8208058	ENSBTAG00000015853	SDHC	-0.367	0.153	0.0163951	0.175834	0
3	8275799	8280141	ENSBTAG00000009213	TOMM40L	-0.451	0.183	0.0124193	0.15137	0
3	8286937	8290169	ENSBTAG00000024503	FCER1G	0.104	0.111	0.348759	0.747026	0
3	8290744	8300810	ENSBTAG00000002203	NDUFS2	-0.033	0.148	0.823536	0.956569	0
3	8303389	8311838	ENSBTAG00000013210	ADAMTS4	0.015	0.061	0.805682	0.953864	0
3	8321014	8326857	ENSBTAG00000021897	B4GALT3	0.093	0.102	0.361769	0.757653	0
3	8326933	8330785	ENSBTAG00000021894	PPOX	0.365	0.179	0.0455003	0.304255	0
3	8331489	8337654	ENSBTAG00000021893	USP21	-0.038	0.122	0.755801	0.938568	0
3	8338252	8362436	ENSBTAG00000021705	UFC1	-0.065	0.131	0.619894	0.888665	0
3	8363117	8373311	ENSBTAG00000020154	DEDD	0.197	0.162	0.230139	0.617591	0
3	8373204	8376843	ENSBTAG00000020153	NIT1	0.199	0.181	0.271332	0.658135	0
3	8376916	8388862	ENSBTAG00000020152	PFDN2	-0.068	0.097	0.483303	0.830993	0
3	8389186	8391006	ENSBTAG00000020150	KLHDC9	0.152	0.103	0.133614	0.501085	0
3	8403138	8419412	ENSBTAG00000017877	NECTIN4	0.27	0.116	0.0214482	0.20425	0
3	8420191	8435163	ENSBTAG00000017875	ARHGAP30	0.083	0.131	0.526081	0.847887	0
3	8436890	8442549	ENSBTAG00000017873	USF1	0.474	0.297	0.109599	0.460088	0
3	8442910	8444112	ENSBTAG00000017856	TSTD1	0.132	0.141	0.349273	0.747866	0
3	8464412	8488977	ENSBTAG00000017846	F11R	0.232	0.196	0.230139	0.617591	0
3	8695315	8755426	ENSBTAG00000002951	CD244	0.063	0.104	0.544515	0.857779	0
3	8760842	8788290	ENSBTAG00000002947	LY9	-0.112	0.119	0.346705	0.746447	0
3	8848948	8864962	ENSBTAG00000001197	SLAMF7	0.125	0.077	0.109599	0.460088	0
3	8901877	8932543	ENSBTAG00000011238	CD48	0.13	0.095	0.161513	0.539421	0
3	9076733	9119524	ENSBTAG00000019033	CD84	-0.095	0.09	0.271332	0.658135	0
3	9152844	9174085	ENSBTAG00000014368	SLAMF6	0.312	0.094	0.000966848	0.0273241	0
3	9265691	9294212	ENSBTAG00000006560	VANGL2	-0.021	0.037	0.570035	0.867602	0
3	9324285	9350657	ENSBTAG00000004334	NCSTN	0.135	0.119	0.271332	0.658135	0
3	9350633	9394688	ENSBTAG00000004333	COPA	-0.174	0.161	0.271332	0.658135	0
3	9399899	9405346	ENSBTAG00000007537	PEX19	-0.331	0.176	0.0574331	0.341833	0
3	9420056	9462754	ENSBTAG00000005796	DCAF8	0.2	0.196	0.317311	0.726324	0
3	9460717	9471684	ENSBTAG00000005793	PEA15	-0.212	0.15	0.161513	0.539421	0
3	9528257	9552859	ENSBTAG00000010551	ATP1A2	-0.03	0.042	0.475227	0.826397	0
3	9577152	9584516	ENSBTAG00000009982	IGSF8	0.094	0.096	0.32758	0.736198	0
3	9603030	9638172	ENSBTAG00000002414	KCNJ10	-0.082	0.052	0.109599	0.460088	0
3	9644360	9647791	ENSBTAG00000002419	PIGM	-0.574	0.143	6.33425e-05	0.00324319	0
3	9739774	9759677	ENSBTAG00000001481	IGSF9	0.122	0.055	0.0278069	0.233704	0
3	9761198	9769010	ENSBTAG00000002068	TAGLN2	-0.05	0.115	0.663562	0.906535	0
3	9825348	9833376	ENSBTAG00000010670	VSIG8	-0.092	0.089	0.317311	0.726324	0
3	9912927	9914349	ENSBTAG00000004776	DUSP23	-0.013	0.118	0.912409	0.982243	0
3	10525788	10528190	ENSBTAG00000003220	ACKR1	-0.007	0.059	0.905275	0.980081	0
3	10531472	10562417	ENSBTAG00000003217	CADM3	-0.06	0.06	0.317311	0.726324	0
3	11606607	11610099	ENSBTAG00000009421	CD1E	0.251	0.072	0.000465258	0.0158149	0
3	11914670	11919678	ENSBTAG00000039993	CD1D	-0.032	0.077	0.67741	0.909232	0
3	12272293	12372265	ENSBTAG00000005799	KIRREL1	0.016	0.069	0.816538	0.956569	0
3	12508921	12526879	ENSBTAG00000022514	CD5L	-0.032	0.038	0.399788	0.780132	0
3	12804191	12868240	ENSBTAG00000000964	FCRL5	0.067	0.067	0.317311	0.726324	0
3	13730370	13744313	ENSBTAG00000008649	ETV3	-0.062	0.261	0.811881	0.955563	0
3	13871481	13922860	ENSBTAG00000012361	ARHGEF11	-0.094	0.133	0.479566	0.828176	0
3	13925709	13938001	ENSBTAG00000012348	LRRC71	-0.093	0.062	0.133614	0.501085	0
3	13938873	13959672	ENSBTAG00000012405	PEAR1	0.085	0.069	0.230139	0.617591	0
3	14027673	14037569	ENSBTAG00000024470	SH2D2A	0.05	0.096	0.602367	0.880559	0
3	14042676	14070433	ENSBTAG00000000608	PRCC	0.243	0.164	0.133614	0.501085	0
3	14082643	14098646	ENSBTAG00000039793	HDGF	-0.048	0.17	0.777944	0.944508	0
3	14093466	14098646	ENSBTAG00000001520	MRPL24	-0.024	0.148	0.871306	0.969988	0
3	14098949	14105919	ENSBTAG00000001519	RRNAD1	0.016	0.166	0.923521	0.984075	0
3	14106347	14111649	ENSBTAG00000001518	ISG20L2	-0.116	0.209	0.578895	0.871225	0
3	14124443	14130828	ENSBTAG00000005716	CRABP2	0.044	0.065	0.498406	0.835822	0
3	14159893	14168905	ENSBTAG00000015794	NES	0.204	0.109	0.0574331	0.341833	0
3	14232918	14240979	ENSBTAG00000000406	GPATCH4	0.187	0.127	0.133614	0.501085	0
3	14237515	14244262	ENSBTAG00000000404	NAXE	0.002	0.175	0.991223	0.998057	0
3	14259699	14299013	ENSBTAG00000006882	IQGAP3	-0.042	0.042	0.317311	0.726324	0
3	14329333	14359887	ENSBTAG00000046545	MEF2D	0.026	0.085	0.759605	0.939005	0
3	14441107	14453937	ENSBTAG00000012234	RHBG	-0.05	0.075	0.504772	0.837772	0
3	14486486	14501164	ENSBTAG00000006370	CCT3	0.22	0.168	0.193601	0.577546	0
3	14506327	14509256	ENSBTAG00000006364	GLMP	-0.068	0.128	0.595419	0.878801	0
3	14509511	14515615	ENSBTAG00000009436	TMEM79	0.15	0.071	0.0357288	0.268394	0
3	14517240	14544995	ENSBTAG00000009435	SMG5	-0.26	0.217	0.230139	0.617591	0
3	14546206	14551083	ENSBTAG00000009434	PAQR6	-0.214	0.109	0.0455003	0.304255	0
3	14553830	14575605	ENSBTAG00000009432	PMF1	-0.273	0.118	0.0214482	0.20425	0
3	14575798	14592765	ENSBTAG00000009431	SLC25A44	-0.026	0.168	0.876821	0.971802	0
3	14606839	14627449	ENSBTAG00000012228	SEMA4A	0.48	0.124	9.61927e-05	0.00456244	0
3	14642915	14670926	ENSBTAG00000017574	LMNA	0.009	0.102	0.929877	0.98604	0
3	14690553	14695864	ENSBTAG00000019158	MEX3A	-0.047	0.06	0.433627	0.800708	0
3	14700973	14708274	ENSBTAG00000018914	RAB25	0.171	0.139	0.230139	0.617591	0
3	14709191	14713057	ENSBTAG00000011754	LAMTOR2	0.144	0.112	0.193601	0.577546	0
3	14713270	14728924	ENSBTAG00000001548	UBQLN4	-0.171	0.25	0.493975	0.835183	0
3	14754110	14760797	ENSBTAG00000001212	SSR2	0.138	0.175	0.430112	0.797708	0
3	14781460	14813371	ENSBTAG00000000113	ARHGEF2	-0.279	0.146	0.0574331	0.341833	0
3	14834858	14852135	ENSBTAG00000000108	KHDC4	0.298	0.295	0.317311	0.726324	0
3	14853319	14862517	ENSBTAG00000000105	RIT1	0.325	0.166	0.0455003	0.304255	0
3	14871960	14949656	ENSBTAG00000011209	SYT11	0.029	0.077	0.706174	0.92038	0
3	14893062	15038514	ENSBTAG00000020356	GON4L	0.326	0.261	0.230139	0.617591	0
3	15038527	15042707	ENSBTAG00000026613	MSTO1	-0.141	0.132	0.271332	0.658135	0
3	15051165	15090850	ENSBTAG00000001199	DAP3	-0.452	0.203	0.0278069	0.233704	0
3	15121790	15298435	ENSBTAG00000003954	ASH1L	0.137	0.117	0.230139	0.617591	0
3	15301261	15310732	ENSBTAG00000054061	RUSC1	-0.056	0.1	0.575479	0.869722	0
3	15311058	15320377	ENSBTAG00000003948	FDPS	0.061	0.095	0.520873	0.845505	0
3	15367523	15376512	ENSBTAG00000014393	CLK2	0.357	0.236	0.133614	0.501085	0
3	15376265	15381469	ENSBTAG00000012094	SCAMP3	-0.011	0.197	0.955342	0.992488	0
3	15382809	15387801	ENSBTAG00000047731	FAM189B	-0.043	0.064	0.501584	0.837478	0
3	15390177	15409004	ENSBTAG00000014841	GBA	-0.726	0.201	0.000318217	0.0118359	0
3	15409490	15414531	ENSBTAG00000014840	MTX1	-0.323	0.144	0.0278069	0.233704	0
3	15414611	15425793	ENSBTAG00000000057	THBS3	-0.241	0.08	0.0026998	0.0575565	0
3	15427371	15432019	ENSBTAG00000017104	MUC1	0.116	0.06	0.0574331	0.341833	0
3	15433668	15443429	ENSBTAG00000010622	TRIM46	-0.132	0.072	0.0718606	0.378219	0
3	15444041	15446577	ENSBTAG00000010617	KRTCAP2	0.088	0.144	0.5412	0.855751	0
3	15462231	15462806	ENSBTAG00000003535	DPM3	0.002	0.117	0.986437	0.996765	0
3	15463443	15465501	ENSBTAG00000003083	SLC50A1	0.484	0.09	6.66409e-08	7.62135e-06	0
3	15466566	15473164	ENSBTAG00000020244	EFNA1	0.042	0.157	0.788699	0.948812	0
3	15512373	15521191	ENSBTAG00000033423	EFNA3	-0.049	0.043	0.271332	0.658135	0
3	15532649	15536764	ENSBTAG00000010673	EFNA4	-0.068	0.099	0.492083	0.834134	0
3	15538260	15548475	ENSBTAG00000010663	ADAM15	-0.099	0.111	0.372393	0.76408	0
3	15577907	15593999	ENSBTAG00000021512	ZBTB7B	-0.074	0.142	0.602367	0.880559	0
3	15602874	15609853	ENSBTAG00000000186	FLAD1	-0.36	0.174	0.0357288	0.268394	0
3	15612556	15616057	ENSBTAG00000024476	CKS1B	0.097	0.163	0.551843	0.86178	0
3	15616454	15626916	ENSBTAG00000019838	SHC1	-0.022	0.181	0.902899	0.980013	0
3	15627232	15643667	ENSBTAG00000004552	PBXIP1	0.099	0.158	0.530659	0.84918	0
3	15659639	15669862	ENSBTAG00000017819	PMVK	0.062	0.093	0.504772	0.837772	0
3	15725419	15891605	ENSBTAG00000018249	KCNN3	-0.175	0.091	0.0574331	0.341833	0
3	15968147	15994363	ENSBTAG00000007519	ADAR	0.148	0.129	0.271332	0.658135	0
3	16022438	16032162	ENSBTAG00000007515	UBE2Q1	0.164	0.201	0.4145	0.788962	0
3	16086187	16104559	ENSBTAG00000020542	SHE	0.174	0.109	0.109599	0.460088	0
3	16119373	16173990	ENSBTAG00000018474	IL6R	-0.204	0.099	0.0357288	0.268394	0
3	16210799	16232969	ENSBTAG00000005161	ATP8B2	-0.029	0.105	0.782548	0.946343	0
3	16250174	16252803	ENSBTAG00000013025	HAX1	0.252	0.173	0.133614	0.501085	0
3	16260349	16300420	ENSBTAG00000004271	UBAP2L	-0.016	0.155	0.917963	0.984	0
3	16300763	16309171	ENSBTAG00000020026	C3H1orf43	0.054	0.14	0.699497	0.917541	0
3	16318632	16346043	ENSBTAG00000033217	TPM3	0.391	0.217	0.0718606	0.378219	0
3	16347123	16447546	ENSBTAG00000004987	NUP210L	0.057	0.16	0.721841	0.927658	0
3	16447956	16449471	ENSBTAG00000013866	RPS27	0.092	0.119	0.439522	0.802991	0
3	16453323	16457405	ENSBTAG00000017604	RAB13	0.014	0.152	0.926698	0.984888	0
3	16461551	16465986	ENSBTAG00000014694	JTB	0.073	0.149	0.624134	0.889843	0
3	16464193	16472933	ENSBTAG00000014692	CREB3L4	-0.186	0.168	0.271332	0.658135	0
3	16473115	16477147	ENSBTAG00000011284	SLC39A1	0.06	0.194	0.757322	0.938655	0
3	16477455	16487230	ENSBTAG00000017942	CRTC2	-0.036	0.083	0.664288	0.906535	0
3	16489959	16502409	ENSBTAG00000018711	DENND4B	-0.049	0.083	0.555191	0.862128	0
3	16574943	16586974	ENSBTAG00000006678	GATAD2B	0.184	0.15	0.230139	0.617591	0
3	16619248	16624026	ENSBTAG00000021862	SLC27A3	0.03	0.078	0.700237	0.917922	0
3	16625276	16664624	ENSBTAG00000006235	INTS3	0.016	0.12	0.894193	0.977772	0
3	16686148	16700685	ENSBTAG00000006234	NPR1	0.068	0.079	0.389238	0.773447	0
3	16711945	16723007	ENSBTAG00000012471	ILF2	-0.164	0.159	0.317311	0.726324	0
3	16722663	16724347	ENSBTAG00000012470	SNAPIN	-0.583	0.199	0.00373163	0.0724824	0
3	16739580	16750665	ENSBTAG00000005166	CHTOP	-0.163	0.226	0.47091	0.824867	1
3	16751302	16755589	ENSBTAG00000005163	S100A1	-0.023	0.056	0.681073	0.910751	0
3	16756363	16772529	ENSBTAG00000021378	S100A13	-0.04	0.1	0.689157	0.913179	0
3	16766542	16768597	ENSBTAG00000021377	S100A14	-0.062	0.07	0.375618	0.766072	0
3	16769716	16776627	ENSBTAG00000014204	S100A16	0.072	0.081	0.374003	0.764691	0
3	16805481	16811823	ENSBTAG00000037651	S100A2	-0.055	0.051	0.271332	0.658135	0
3	16824126	16826559	ENSBTAG00000019203	S100A4	-0.001	0.063	0.987234	0.996765	0
3	16905298	16909160	ENSBTAG00000008238	S100A7	0.009	0.029	0.756561	0.938568	0
3	17085577	17086827	ENSBTAG00000012640	S100A8	-0.045	0.031	0.133614	0.501085	0
3	17102722	17104173	ENSBTAG00000012638	S100A12	-0.028	0.042	0.504772	0.837772	0
3	17115128	17117984	ENSBTAG00000006505	S100A9	-0.049	0.032	0.133614	0.501085	0
3	18727498	18733580	ENSBTAG00000015145	S100A11	0.003	0.065	0.96331	0.99467	0
3	18762472	18773422	ENSBTAG00000015147	S100A10	-0.1	0.101	0.322174	0.733615	1
3	18844273	18892924	ENSBTAG00000004772	THEM4	-0.106	0.093	0.271332	0.658135	0
3	18953213	18980402	ENSBTAG00000017405	RORC	0.142	0.087	0.109599	0.460088	1
3	18981628	18983577	ENSBTAG00000040596	LINGO4	0.107	0.069	0.109599	0.460088	0
3	18992376	19014072	ENSBTAG00000021594	TDRKH	0.223	0.112	0.0455003	0.304255	0
3	19021833	19028884	ENSBTAG00000000797	MRPL9	-0.02	0.18	0.911616	0.981994	0
3	19085294	19166836	ENSBTAG00000001942	SNX27	0.184	0.214	0.389789	0.773447	0
3	19199747	19250840	ENSBTAG00000017566	TUFT1	0.041	0.128	0.748968	0.936268	0
3	19252157	19277508	ENSBTAG00000017564	CGN	0.07	0.151	0.642648	0.899883	0
3	19322591	19369632	ENSBTAG00000021289	POGZ	-0.21	0.199	0.271332	0.658135	0
3	19371017	19374091	ENSBTAG00000021288	PSMB4	0.103	0.146	0.48081	0.829154	0
3	19442661	19451510	ENSBTAG00000008091	SELENBP1	-0.142	0.071	0.0455003	0.304255	0
3	19463618	19470141	ENSBTAG00000017580	RFX5	0.021	0.188	0.910823	0.981994	0
3	19481062	19509852	ENSBTAG00000007320	PI4KB	0.036	0.162	0.824314	0.956569	0
3	19509778	19518770	ENSBTAG00000007318	ZNF687	-0.193	0.141	0.161513	0.539421	0
3	19555183	19565649	ENSBTAG00000006101	PSMD4	0.328	0.185	0.0718606	0.378219	0
3	19572074	19611272	ENSBTAG00000006099	PIP5K1A	-0.309	0.245	0.193601	0.577546	0
3	19623986	19636738	ENSBTAG00000018074	VPS72	0.027	0.222	0.902899	0.980013	0
3	19637443	19641926	ENSBTAG00000018071	TMOD4	-0.081	0.084	0.335046	0.739931	0
3	19642451	19644982	ENSBTAG00000018070	SCNM1	0.221	0.212	0.317311	0.726324	0
3	19645437	19653958	ENSBTAG00000020395	LYSMD1	0.017	0.204	0.933852	0.986834	0
3	19653958	19656771	ENSBTAG00000020394	TNFAIP8L2	0.196	0.103	0.0574331	0.341833	0
3	19673523	19687033	ENSBTAG00000007281	SEMA6C	0.053	0.067	0.428944	0.796508	0
3	19698284	19715704	ENSBTAG00000015371	GABPB2	-0.081	0.18	0.65271	0.9031	0
3	19721037	19726107	ENSBTAG00000015369	MLLT11	-0.177	0.186	0.341097	0.743632	0
3	19726452	19734555	ENSBTAG00000015363	CDC42SE1	0.297	0.223	0.193601	0.577546	0
3	19737600	19745849	ENSBTAG00000015345	BNIPL	-0.009	0.091	0.921138	0.984	0
3	19744729	19764785	ENSBTAG00000015336	PRUNE1	0.129	0.246	0.600279	0.880311	0
3	19766326	19775894	ENSBTAG00000015329	MINDY1	0.069	0.179	0.700237	0.917922	0
3	19777160	19786734	ENSBTAG00000015304	ANXA9	0.129	0.099	0.193601	0.577546	0
3	19792564	19804799	ENSBTAG00000000099	CERS2	-0.06	0.168	0.721092	0.927183	0
3	19801955	19834258	ENSBTAG00000000098	SETDB1	-0.734	0.302	0.0163951	0.175834	0
3	19884889	19949933	ENSBTAG00000021037	ARNT	0.098	0.195	0.614964	0.886181	0
3	19953196	19966177	ENSBTAG00000021035	CTSK	0.428	0.117	0.000215599	0.00885332	0
3	19981529	20004455	ENSBTAG00000017135	CTSS	0.196	0.108	0.0718606	0.378219	0
3	20036707	20083521	ENSBTAG00000020357	GOLPH3L	0.038	0.126	0.762652	0.939451	0
3	20098776	20104404	ENSBTAG00000007123	ENSA	0.143	0.217	0.509896	0.840463	0
3	20129373	20134008	ENSBTAG00000015154	MCL1	-0.077	0.142	0.587819	0.875397	0
3	20143733	20155185	ENSBTAG00000003604	ADAMTSL4	-0.008	0.058	0.89024	0.976241	0
3	20183480	20191176	ENSBTAG00000003806	ECM1	0.019	0.065	0.770287	0.941282	0
3	20190884	20202510	ENSBTAG00000003799	TARS2	0.075	0.17	0.659213	0.905951	0
3	20203827	20302019	ENSBTAG00000014984	RPRD2	-0.215	0.176	0.230139	0.617591	0
3	20311487	20330731	ENSBTAG00000013946	PRPF3	-0.299	0.22	0.161513	0.539421	0
3	20338181	20351092	ENSBTAG00000024378	MRPS21	0.125	0.15	0.404845	0.783502	0
3	20363111	20369973	ENSBTAG00000021485	C3H1orf54	0.08	0.098	0.4145	0.788962	0
3	20372002	20376143	ENSBTAG00000021482	APH1A	-0.006	0.226	0.97846	0.99571	0
3	20375866	20383625	ENSBTAG00000021481	CA14	-0.032	0.047	0.495871	0.835183	0
3	20409567	20423408	ENSBTAG00000016730	ANP32E	0.026	0.112	0.816538	0.956569	0
3	20475129	20485097	ENSBTAG00000004852	PLEKHO1	0.094	0.134	0.483303	0.830993	0
3	20490334	20556989	ENSBTAG00000020635	VPS45	0.266	0.149	0.0718606	0.378219	0
3	20611449	20666228	ENSBTAG00000001586	OTUD7B	0.133	0.196	0.497138	0.835183	0
3	20672618	20680889	ENSBTAG00000012496	MTMR11	-0.08	0.114	0.482679	0.830621	0
3	20681758	20685817	ENSBTAG00000012495	SF3B4	-0.107	0.098	0.271332	0.658135	0
3	20696426	20710108	ENSBTAG00000001599	SV2A	-0.104	0.082	0.193601	0.577546	0
3	20713195	20714518	ENSBTAG00000006050	BOLA1	-0.009	0.136	0.947378	0.990437	0
3	20802181	20811180	ENSBTAG00000008592	FCGR1A	0.236	0.092	0.00932238	0.125223	0
3	21383711	21387865	ENSBTAG00000020060	TXNIP	-0.106	0.113	0.348244	0.746447	0
3	21398790	21402032	ENSBTAG00000013910	POLR3GL	-0.089	0.222	0.68842	0.913179	0
3	21413252	21415922	ENSBTAG00000008365	ANKRD34A	-0.061	0.092	0.507331	0.839325	0
3	21418275	21448521	ENSBTAG00000008369	RBM8A	-0.086	0.176	0.624842	0.890127	0
3	21454070	21459694	ENSBTAG00000008372	PEX11B	0.135	0.166	0.416218	0.789737	0
3	21460548	21477566	ENSBTAG00000008373	ITGA10	-0.129	0.131	0.324624	0.734682	0
3	21505807	21515218	ENSBTAG00000021634	PIAS3	-0.12	0.1	0.230139	0.617591	0
3	21512445	21517734	ENSBTAG00000021635	NUDT17	-0.041	0.146	0.77871	0.944783	0
3	21519781	21532978	ENSBTAG00000021637	POLR3C	0.716	0.291	0.0124193	0.15137	0
3	21532899	21598565	ENSBTAG00000008131	RNF115	-0.091	0.122	0.455667	0.815086	0
3	21684181	21695746	ENSBTAG00000005810	PDZK1	0.184	0.093	0.0455003	0.304255	0
3	21695356	21742236	ENSBTAG00000005809	GPR89A	-0.022	0.175	0.899732	0.979965	0
3	21877817	21894417	ENSBTAG00000006720	GJA5	0.117	0.076	0.133614	0.501085	0
3	21960526	21981430	ENSBTAG00000017051	ACP6	0.116	0.171	0.497772	0.835445	0
3	22002398	22098251	ENSBTAG00000002422	BCL9	-0.009	0.086	0.916376	0.983485	0
3	22381862	22446397	ENSBTAG00000020831	CHD1L	0.162	0.174	0.351854	0.749327	0
3	22466919	22510019	ENSBTAG00000010841	FMO5	-0.015	0.062	0.80878	0.954662	0
3	22528348	22542857	ENSBTAG00000014387	PRKAB2	0.087	0.211	0.680339	0.910751	0
3	22756471	23031334	ENSBTAG00000001564	PDE4DIP	0.088	0.137	0.520873	0.845505	0
3	23075087	23100499	ENSBTAG00000007712	SEC22B	0.003	0.089	0.972877	0.99571	0
3	23163504	23368572	ENSBTAG00000007909	NOTCH2	-0.002	0.105	0.984841	0.996765	0
3	23565140	23596466	ENSBTAG00000039719	PHGDH	0.175	0.083	0.0357288	0.268394	0
3	23660109	23691442	ENSBTAG00000032187	ZNF697	0.155	0.14	0.271332	0.658135	0
3	23999239	24101046	ENSBTAG00000005064	WARS2	0.267	0.147	0.0718606	0.378219	0
3	24129991	24254368	ENSBTAG00000007767	TBX15	-0.087	0.074	0.230139	0.617591	0
3	25251271	25286207	ENSBTAG00000019937	WDR3	0.057	0.17	0.737625	0.933704	0
3	25299568	25353595	ENSBTAG00000016387	GDAP2	0.038	0.153	0.804134	0.953864	0
3	25592621	25593796	ENSBTAG00000046509	TENT5C	0.082	0.084	0.329064	0.737502	0
3	25709064	25856341	ENSBTAG00000003586	MAN1A2	0.177	0.062	0.00373163	0.0724824	0
3	26099795	26109125	ENSBTAG00000001748	TRIM45	0.003	0.058	0.958529	0.993185	0
3	26126025	26179583	ENSBTAG00000015392	TTF2	0.044	0.116	0.704688	0.92038	0
3	26201587	26239599	ENSBTAG00000018203	CD101	-0.081	0.076	0.271332	0.658135	0
3	26252748	26331248	ENSBTAG00000008022	PTGFRN	-0.037	0.105	0.724838	0.928585	0
3	26468671	26483254	ENSBTAG00000017256	CD2	-0.185	0.088	0.0357288	0.268394	0
3	26574398	26704608	ENSBTAG00000004849	IGSF3	0.047	0.091	0.605854	0.8826	0
3	26709589	26773139	ENSBTAG00000040131	CD58	-0.36	0.167	0.0278069	0.233704	0
3	26886560	26919931	ENSBTAG00000001246	ATP1A1	-0.427	0.129	0.000966848	0.0273241	0
3	27261018	27363147	ENSBTAG00000000664	SLC22A15	0.05	0.043	0.230139	0.617591	0
3	27624363	27677204	ENSBTAG00000005788	VANGL1	-0.087	0.093	0.349788	0.748184	0
3	28254062	28339667	ENSBTAG00000015961	TSPAN2	-0.053	0.071	0.455667	0.815086	0
3	28556518	28562488	ENSBTAG00000015977	SIKE1	0.026	0.121	0.829767	0.957821	0
3	28579009	28614809	ENSBTAG00000000678	CSDE1	-0.115	0.143	0.421397	0.792475	0
3	28614965	28624861	ENSBTAG00000046797	NRAS	0.032	0.187	0.864224	0.968536	0
3	28661323	28753483	ENSBTAG00000012194	DENND2C	0.008	0.139	0.953749	0.992488	0
3	28755534	28769812	ENSBTAG00000016705	BCAS2	0.083	0.14	0.553181	0.862128	0
3	28837852	28977392	ENSBTAG00000001499	TRIM33	-0.067	0.127	0.597499	0.879432	0
3	29390850	29394608	ENSBTAG00000011327	OLFML3	0.067	0.079	0.396438	0.778436	0
3	29399811	29449947	ENSBTAG00000011322	HIPK1	-0.042	0.174	0.809555	0.954662	0
3	29473236	29479991	ENSBTAG00000003616	DCLRE1B	0.111	0.084	0.193601	0.577546	0
3	29479664	29489949	ENSBTAG00000003614	AP4B1	0.672	0.168	6.33425e-05	0.00324319	0
3	29498121	29502961	ENSBTAG00000012419	BCL2L15	0.136	0.029	2.60161e-06	0.000218055	0
3	29519988	29575960	ENSBTAG00000019617	PTPN22	-0.042	0.096	0.661386	0.906314	0
3	29579106	29618905	ENSBTAG00000031940	RSBN1	-0.134	0.089	0.133614	0.501085	0
3	29624990	29696827	ENSBTAG00000019615	PHTF1	-0.149	0.136	0.271332	0.658135	0
3	29703286	29962037	ENSBTAG00000019611	MAGI3	-0.296	0.126	0.0214482	0.20425	0
3	30209587	30272272	ENSBTAG00000008525	LRIG2	-0.034	0.145	0.814985	0.956569	0
3	30382285	30411742	ENSBTAG00000015107	SLC16A1	0.047	0.064	0.462949	0.820209	0
3	30609356	30615182	ENSBTAG00000006081	PPM1J	0.061	0.073	0.403155	0.782335	0
3	30617923	30624465	ENSBTAG00000014299	RHOC	0.059	0.116	0.610752	0.884648	0
3	30624734	30652245	ENSBTAG00000014297	MOV10	0.175	0.123	0.161513	0.539421	0
3	30657802	30701981	ENSBTAG00000014295	CAPZA1	0.095	0.146	0.515046	0.84316	0
3	30702703	30844632	ENSBTAG00000014294	ST7L	-0.111	0.126	0.378318	0.767232	0
3	30790883	30805442	ENSBTAG00000014291	WNT2B	-0.017	0.073	0.815761	0.956569	0
3	30834932	30885081	ENSBTAG00000021602	CTTNBP2NL	-0.002	0.152	0.989628	0.997782	0
3	31311513	31530748	ENSBTAG00000031654	KCND3	-0.128	0.114	0.271332	0.658135	0
3	31539743	31550254	ENSBTAG00000018717	DDX20	-0.182	0.173	0.271332	0.658135	0
3	31588106	31676077	ENSBTAG00000050904	RAP1A	-0.148	0.121	0.230139	0.617591	0
3	31846429	31863330	ENSBTAG00000006441	ATP5PB	-0.122	0.121	0.317311	0.726324	0
3	31863581	31873115	ENSBTAG00000014102	WDR77	0.126	0.161	0.433627	0.800708	0
3	31890059	31901999	ENSBTAG00000005973	OVGP1	0.145	0.113	0.193601	0.577546	0
3	32204153	32224615	ENSBTAG00000020172	DENND2D	0.049	0.14	0.726339	0.92866	0
3	32227187	32272255	ENSBTAG00000020169	CEPT1	-0.297	0.187	0.109599	0.460088	0
3	32272397	32300821	ENSBTAG00000009888	DRAM2	-0.181	0.169	0.271332	0.658135	0
3	32408226	32428000	ENSBTAG00000012659	LRIF1	0.209	0.146	0.161513	0.539421	0
3	32494132	32533031	ENSBTAG00000006466	CD53	0.087	0.1	0.3843	0.770553	0
3	32745301	32747031	ENSBTAG00000047879	KCNA3	-0.222	0.101	0.0278069	0.233704	0
3	32969972	32974969	ENSBTAG00000010560	PROK1	0.067	0.029	0.0214482	0.20425	0
3	33026800	33031126	ENSBTAG00000014970	LAMTOR5	-0.022	0.129	0.864224	0.968536	1
3	33044290	33074902	ENSBTAG00000015380	SLC16A4	0.054	0.051	0.271332	0.658135	0
3	33088523	33095448	ENSBTAG00000012555	RBM15	0.036	0.073	0.622013	0.889202	0
3	33193740	33216772	ENSBTAG00000007352	KCNC4	-0.073	0.045	0.109599	0.460088	0
3	33226163	33281966	ENSBTAG00000001981	SLC6A17	0	0.035	1	1	0
3	33374163	33393926	ENSBTAG00000020964	STRIP1	-0.019	0.199	0.924315	0.984493	0
3	33403800	33444827	ENSBTAG00000018893	AHCYL1	-0.245	0.266	0.35705	0.754355	0
3	33488957	33509479	ENSBTAG00000000283	CSF1	0.08	0.08	0.317311	0.726324	0
3	33652466	33655778	ENSBTAG00000001842	GSTM3	-0.134	0.072	0.0574331	0.341833	0
3	33667202	33720169	ENSBTAG00000017765	GSTM1	-0.173	0.12	0.161513	0.539421	0
3	33818280	33830235	ENSBTAG00000013018	AMPD2	-0.089	0.125	0.476465	0.826552	0
3	33837406	33846790	ENSBTAG00000013017	GNAT2	-0.012	0.085	0.88787	0.97539	0
3	33854858	33899237	ENSBTAG00000013016	GNAI3	-0.14	0.17	0.40994	0.786768	0
3	33940232	33945726	ENSBTAG00000014083	AMIGO1	0.129	0.138	0.349788	0.748184	0
3	33946014	33954930	ENSBTAG00000016643	CYB561D1	0.245	0.169	0.161513	0.539421	0
3	33956341	33965040	ENSBTAG00000009042	ATXN7L2	-0.053	0.082	0.518279	0.844611	0
3	34012638	34033681	ENSBTAG00000020641	PSMA5	-0.175	0.18	0.331051	0.73763	0
3	34036271	34100367	ENSBTAG00000008849	SORT1	-0.046	0.119	0.698756	0.91716	0
3	34122368	34129175	ENSBTAG00000018806	PSRC1	-0.11	0.089	0.230139	0.617591	0
3	34131464	34157519	ENSBTAG00000018804	CELSR2	-0.009	0.069	0.896566	0.97888	0
3	34286939	34291820	ENSBTAG00000038979	TMEM167B	0.031	0.112	0.78178	0.945975	0
3	34304171	34311597	ENSBTAG00000049309	TAF13	-0.114	0.116	0.325607	0.735411	0
3	34331946	34394375	ENSBTAG00000020384	WDR47	-0.011	0.131	0.933056	0.986505	0
3	34397588	34430982	ENSBTAG00000017129	CLCC1	0.007	0.196	0.971282	0.995693	0
3	34431970	34485343	ENSBTAG00000017124	GPSM2	-0.353	0.137	0.00932238	0.125223	0
3	34568247	34622399	ENSBTAG00000007330	STXBP3	0.17	0.132	0.193601	0.577546	0
3	34673537	34681037	ENSBTAG00000047874	PRPF38B	-0.103	0.133	0.438931	0.802991	0
3	34726393	34805116	ENSBTAG00000005439	FAM102B	0.276	0.126	0.0278069	0.233704	0
3	35311502	35742106	ENSBTAG00000031575	VAV3	0.277	0.118	0.0214482	0.20425	0
3	35852447	36220155	ENSBTAG00000014530	NTNG1	-0.201	0.057	0.000465258	0.0158149	0
3	36311513	36312871	ENSBTAG00000039951	PRMT6	0.173	0.138	0.193601	0.577546	0
3	39784076	39858496	ENSBTAG00000019093	AMY2B	-0.074	0.09	0.411077	0.787186	0
3	39855791	39883179	ENSBTAG00000019091	RNPC3	-0.342	0.148	0.0214482	0.20425	0
3	40305057	40530663	ENSBTAG00000021217	COL11A1	-0.009	0.033	0.784853	0.947258	1
3	42027458	42039822	ENSBTAG00000005990	S1PR1	0.098	0.144	0.495871	0.835183	0
3	42259115	42299418	ENSBTAG00000019029	DPH5	-0.306	0.176	0.0891309	0.421769	0
3	42316067	42410097	ENSBTAG00000019027	SLC30A7	-0.111	0.088	0.193601	0.577546	0
3	42410254	42428917	ENSBTAG00000019026	EXTL2	0.129	0.086	0.133614	0.501085	0
3	42553488	42576599	ENSBTAG00000007773	VCAM1	0.369	0.105	0.000465258	0.0158149	0
3	42742189	42956403	ENSBTAG00000031439	CDC14A	0.016	0.133	0.904483	0.980081	0
3	43006658	43034731	ENSBTAG00000006321	RTCA	-0.442	0.181	0.0163951	0.175834	0
3	43039359	43079725	ENSBTAG00000006320	DBT	-0.204	0.117	0.0891309	0.421769	0
3	43120392	43140707	ENSBTAG00000015781	TRMT13	-0.211	0.185	0.271332	0.658135	0
3	43140706	43181017	ENSBTAG00000015778	SASS6	-0.156	0.152	0.317311	0.726324	0
3	43182189	43236013	ENSBTAG00000015776	MFSD14A	0.017	0.158	0.913996	0.98274	0
3	43249864	43294691	ENSBTAG00000012454	SLC35A3	-0.08	0.14	0.568	0.866552	0
3	43353479	43432848	ENSBTAG00000006491	AGL	-0.15	0.128	0.230139	0.617591	0
3	43472653	43525462	ENSBTAG00000003440	FRRS1	-0.016	0.084	0.849309	0.964905	0
3	43536420	43596800	ENSBTAG00000017655	PALMD	0.261	0.112	0.0214482	0.20425	0
3	44501668	44620479	ENSBTAG00000031461	SNX7	-0.407	0.158	0.00932238	0.125223	0
3	45408337	46330781	ENSBTAG00000031358	DPYD	-0.115	0.103	0.271332	0.658135	0
3	46655713	46739928	ENSBTAG00000008809	PTBP2	0.064	0.147	0.663562	0.906535	0
3	48239823	48252404	ENSBTAG00000021537	RWDD3	0.107	0.118	0.364407	0.759667	0
3	48405843	48504005	ENSBTAG00000004422	ALG14	-0.382	0.124	0.00193521	0.0465248	0
3	48568965	48599126	ENSBTAG00000020345	CNN3	0.29	0.151	0.0574331	0.341833	0
3	48601342	48687899	ENSBTAG00000020344	SLC44A3	-0.398	0.121	0.000966848	0.0273241	0
3	48954585	48965477	ENSBTAG00000007101	F3	0.077	0.06	0.193601	0.577546	0
3	48980774	49070167	ENSBTAG00000009698	ABCD3	0.271	0.141	0.0574331	0.341833	1
3	49238269	49319832	ENSBTAG00000004190	ARHGAP29	0.098	0.132	0.458087	0.816312	0
3	49581839	49599562	ENSBTAG00000007842	GCLM	0.102	0.148	0.490823	0.833644	0
3	49610656	49621980	ENSBTAG00000047679	DNTTIP2	0.044	0.104	0.672295	0.907727	0
3	49691045	49912338	ENSBTAG00000003245	BCAR3	0.055	0.108	0.610752	0.884648	0
3	49925230	50044652	ENSBTAG00000004383	FNBP1L	-0.116	0.134	0.38649	0.77153	0
3	50084785	50106905	ENSBTAG00000008737	DR1	0.081	0.201	0.686948	0.912327	0
3	50177447	50290702	ENSBTAG00000027321	CCDC18	0.002	0.09	0.982448	0.996272	0
3	50290372	50308915	ENSBTAG00000020180	TMED5	-0.061	0.111	0.582319	0.873586	0
3	50331720	50402638	ENSBTAG00000001393	MTF2	-0.047	0.12	0.695058	0.915842	0
3	50629956	50639054	ENSBTAG00000002026	RPL5	0.165	0.134	0.230139	0.617591	0
3	50677521	50918603	ENSBTAG00000011363	EVI5	-0.143	0.126	0.271332	0.658135	0
3	50945369	50956131	ENSBTAG00000016723	GFI1	0.017	0.075	0.820424	0.956569	0
3	50994444	51122558	ENSBTAG00000018739	RPAP2	-0.33	0.141	0.0214482	0.20425	0
3	51122896	51166887	ENSBTAG00000018737	GLMN	0.713	0.169	2.66915e-05	0.00164962	0
3	51223913	51316954	ENSBTAG00000006167	BTBD8	-0.102	0.108	0.34517	0.746447	0
3	51501752	51709606	ENSBTAG00000024269	TGFBR3	-0.04	0.122	0.742912	0.934808	0
3	51855684	51880799	ENSBTAG00000016307	CDC7	-0.009	0.116	0.937828	0.98771	0
3	52252198	52348486	ENSBTAG00000011200	ZNF644	-0.14	0.096	0.133614	0.501085	0
3	53224391	53259805	ENSBTAG00000019133	ZNF326	0.081	0.159	0.610752	0.884648	1
3	53313193	53443924	ENSBTAG00000020958	LRRC8D	-0.025	0.159	0.875245	0.971286	0
3	53555337	53648204	ENSBTAG00000000900	LRRC8C	-0.265	0.064	4.1315e-05	0.00228766	0
3	53688735	53713047	ENSBTAG00000020214	LRRC8B	1	0.108	1.40446e-20	1.01096e-17	0
3	54094947	54111586	ENSBTAG00000015060	GBP5	-0.493	0.071	5.20025e-12	1.35395e-09	0
3	54451265	54507578	ENSBTAG00000014529	GBP4	-0.672	0.052	4.50097e-38	1.37696e-34	1
3	54928686	54989008	ENSBTAG00000000505	KYAT3	0.427	0.126	0.000673859	0.0207708	0
3	55014449	55045556	ENSBTAG00000000504	GTF2B	0.163	0.143	0.271332	0.658135	0
3	55066989	55200622	ENSBTAG00000021900	PKN2	-0.261	0.131	0.0455003	0.304255	0
3	56698600	56715731	ENSBTAG00000000305	LMO4	0.485	0.175	0.00511026	0.0879525	0
3	57145264	57188980	ENSBTAG00000052268	SELENOF	-0.152	0.069	0.0278069	0.233704	0
3	57269358	57314453	ENSBTAG00000031171	SH3GLB1	-0.19	0.131	0.133614	0.501085	0
3	57408592	57444768	ENSBTAG00000016712	CLCA3	0.079	0.042	0.0574331	0.341833	0
3	57499492	57530509	ENSBTAG00000017357	CLCA4	0.091	0.041	0.0278069	0.233704	0
3	57558897	57592968	ENSBTAG00000008161	CLCA1	0.153	0.047	0.000966848	0.0273241	0
3	57607299	57648396	ENSBTAG00000038215	CLCA2	0.096	0.081	0.230139	0.617591	0
3	57674210	57713603	ENSBTAG00000012907	ODF2L	-0.388	0.132	0.00373163	0.0724824	0
3	58374383	58469385	ENSBTAG00000021051	ZNHIT6	0.139	0.105	0.193601	0.577546	0
3	58618306	58775117	ENSBTAG00000034776	DDAH1	-0.055	0.081	0.497138	0.835183	0
3	58819705	58829797	ENSBTAG00000013851	BCL10	-0.21	0.227	0.354966	0.75242	0
3	58835524	58843022	ENSBTAG00000016326	C3H1orf52	-0.104	0.166	0.530659	0.84918	0
3	58890026	58928166	ENSBTAG00000003444	SYDE2	-0.056	0.06	0.35082	0.749081	0
3	59055510	59090386	ENSBTAG00000016982	MCOLN3	0.075	0.045	0.0891309	0.421769	0
3	59112071	59159718	ENSBTAG00000046773	MCOLN2	-0.15	0.085	0.0718606	0.378219	0
3	59185581	59269352	ENSBTAG00000003791	LPAR3	-0.03	0.081	0.711382	0.923627	0
3	59398296	59456577	ENSBTAG00000018942	SSX2IP	-0.305	0.148	0.0357288	0.268394	0
3	59591885	59600029	ENSBTAG00000008122	GNG5	0.138	0.155	0.373466	0.764691	0
3	59600699	59617167	ENSBTAG00000008118	RPF1	0.336	0.147	0.0214482	0.20425	0
3	59884333	60026329	ENSBTAG00000011953	PRKACB	-0.44	0.173	0.0124193	0.15137	0
3	60110693	60257583	ENSBTAG00000003322	TTLL7	-0.203	0.097	0.0357288	0.268394	0
3	62436807	63147752	ENSBTAG00000012305	ADGRL2	-0.009	0.132	0.945786	0.990197	0
3	65667175	65807163	ENSBTAG00000019733	ADGRL4	-0.076	0.107	0.477704	0.827295	0
3	66029139	66043630	ENSBTAG00000034349	IFI44	0.006	0.073	0.934647	0.987224	0
3	66053647	66071372	ENSBTAG00000030932	IFI44L	-0.072	0.081	0.374003	0.764691	0
3	66128213	66193803	ENSBTAG00000015902	PTGFR	0.024	0.05	0.631227	0.893399	0
3	66535129	66637864	ENSBTAG00000011733	GIPC2	0.068	0.067	0.317311	0.726324	0
3	66664210	66707306	ENSBTAG00000021752	DNAJB4	0.045	0.096	0.63907	0.898162	0
3	66707375	66737434	ENSBTAG00000008926	FUBP1	0.161	0.135	0.230139	0.617591	0
3	66742753	66798302	ENSBTAG00000008921	NEXN	-0.053	0.101	0.599583	0.880311	0
3	66805158	66883012	ENSBTAG00000031044	MIGA1	0.082	0.116	0.479566	0.828176	0
3	66900556	66959868	ENSBTAG00000020761	USP33	0.219	0.141	0.109599	0.460088	0
3	66975443	67094023	ENSBTAG00000017419	ZZZ3	0.086	0.123	0.484552	0.831039	0
3	67098542	67357363	ENSBTAG00000017411	AK5	-0.077	0.092	0.402593	0.782236	0
3	67430365	67568076	ENSBTAG00000031012	PIGK	0.02	0.111	0.857153	0.966637	0
3	67605888	67814273	ENSBTAG00000007309	ST6GALNAC5	-0.17	0.021	5.49592e-16	2.69014e-13	0
3	68962719	69055498	ENSBTAG00000018448	MSH4	0.038	0.071	0.59265	0.877678	0
3	69057556	69065985	ENSBTAG00000018447	RABGGTB	-0.04	0.128	0.755041	0.938568	0
3	69086075	69124464	ENSBTAG00000024240	ACADM	0.064	0.094	0.495871	0.835183	0
3	69968102	69990582	ENSBTAG00000005196	TYW3	0.001	0.104	0.992021	0.998057	0
3	69989882	70019359	ENSBTAG00000003162	CRYZ	-0.099	0.123	0.42082	0.792364	0
3	70600177	70608293	ENSBTAG00000038480	FPGT	-0.017	0.151	0.910031	0.981994	0
3	74146776	74163809	ENSBTAG00000002627	ZRANB2	0.151	0.137	0.271332	0.658135	0
3	74185666	74228359	ENSBTAG00000019230	PTGER3	-0.033	0.049	0.500947	0.837101	0
3	74766636	74793722	ENSBTAG00000014791	CTH	0.04	0.088	0.649109	0.902016	1
3	74830012	74922861	ENSBTAG00000015482	ANKRD13C	-0.056	0.12	0.6405	0.89883	0
3	74928249	74964017	ENSBTAG00000015474	SRSF11	0.148	0.204	0.468452	0.822918	0
3	74977580	75017652	ENSBTAG00000008243	LRRC40	0.06	0.135	0.657043	0.904616	0
3	75039363	75644478	ENSBTAG00000009338	LRRC7	0.02	0.028	0.475227	0.826397	0
3	77070780	77186963	ENSBTAG00000012976	WLS	0.214	0.13	0.109599	0.460088	0
3	77246899	77249257	ENSBTAG00000012182	DIRAS3	0.138	0.093	0.133614	0.501085	0
3	77489268	77629921	ENSBTAG00000054533	GNG12	-0.211	0.121	0.0891309	0.421769	0
3	77648760	77651872	ENSBTAG00000013860	GADD45A	0.011	0.086	0.898149	0.979122	0
3	77922744	77937176	ENSBTAG00000012957	SERBP1	0.129	0.171	0.450849	0.812405	0
3	77948658	78035575	ENSBTAG00000009455	IL12RB2	0.067	0.067	0.317311	0.726324	0
3	78274131	78317314	ENSBTAG00000005445	SLC35D1	0.137	0.1	0.161513	0.539421	0
3	78338108	78408732	ENSBTAG00000005443	MIER1	0.066	0.133	0.619894	0.888665	0
3	78522563	78571153	ENSBTAG00000011097	TCTEX1D1	-0.051	0.022	0.0214482	0.20425	0
3	78580351	78701895	ENSBTAG00000011091	SGIP1	0.23	0.082	0.00511026	0.0879525	0
3	78957184	79406648	ENSBTAG00000008636	PDE4B	0.089	0.101	0.378318	0.767232	0
3	79741920	79838382	ENSBTAG00000005910	LEPR	0.001	0.026	0.969688	0.994891	0
3	79914162	79925489	ENSBTAG00000005909	LEPROT	-0.134	0.18	0.456876	0.815937	0
3	79928534	80107385	ENSBTAG00000030749	DNAJC6	0.007	0.046	0.879187	0.973102	0
3	80160692	80251376	ENSBTAG00000030674	AK4	-0.134	0.104	0.193601	0.577546	0
3	80444566	80584006	ENSBTAG00000003147	JAK1	0.066	0.104	0.525428	0.847794	0
3	80586058	80721387	ENSBTAG00000030686	RAVER2	0.243	0.091	0.00693395	0.103603	0
3	80788175	81022967	ENSBTAG00000016455	CACHD1	0.125	0.125	0.317311	0.726324	0
3	81332951	81538324	ENSBTAG00000012312	ROR1	-0.032	0.091	0.724838	0.928585	0
3	81911178	81978206	ENSBTAG00000019011	PGM1	0.102	0.172	0.553181	0.862128	0
3	81994568	82051985	ENSBTAG00000002600	EFCAB7	0.108	0.179	0.546509	0.85904	0
3	82052300	82157897	ENSBTAG00000030710	ITGB3BP	0.08	0.134	0.550507	0.861176	0
3	82149562	82208238	ENSBTAG00000030706	ALG6	0.157	0.161	0.32956	0.73763	0
3	82756143	82852335	ENSBTAG00000010124	ATG4C	0.585	0.155	0.000144696	0.00643871	0
3	82924988	83115333	ENSBTAG00000019877	DOCK7	0.021	0.095	0.825092	0.956569	0
3	82994335	83003679	ENSBTAG00000021386	ANGPTL3	-0.027	0.036	0.453255	0.813624	0
3	83117927	83129455	ENSBTAG00000020451	USP1	0.024	0.137	0.86108	0.967943	0
3	83258392	83334028	ENSBTAG00000014382	KANK4	-0.132	0.094	0.161513	0.539421	0
3	83556891	83936160	ENSBTAG00000021975	PATJ	-0.134	0.118	0.271332	0.658135	0
3	83947667	83996285	ENSBTAG00000017161	TM2D1	-0.034	0.189	0.857153	0.966637	0
3	84203809	84620790	ENSBTAG00000000074	NFIA	-0.219	0.132	0.0891309	0.421769	0
3	86093399	86163267	ENSBTAG00000030671	HOOK1	-0.027	0.099	0.784853	0.947258	0
3	86213982	86718004	ENSBTAG00000030669	FGGY	-0.219	0.146	0.133614	0.501085	0
3	87265962	87268007	ENSBTAG00000004037	JUN	0.023	0.078	0.767994	0.940729	0
3	87349595	87391325	ENSBTAG00000013961	MYSM1	0.124	0.171	0.468452	0.822918	0
3	87457691	87458650	ENSBTAG00000004381	TACSTD2	0.003	0.04	0.940215	0.988352	0
3	87479245	87544530	ENSBTAG00000017326	OMA1	0.038	0.126	0.762652	0.939451	0
3	88677121	89136086	ENSBTAG00000013802	DAB1	-0.048	0.074	0.516338	0.843808	0
3	89336374	89464197	ENSBTAG00000009314	FYB2	0.055	0.049	0.271332	0.658135	0
3	89477899	89549744	ENSBTAG00000018747	PRKAA2	0.102	0.061	0.0891309	0.421769	0
3	89608083	89696904	ENSBTAG00000011640	PLPP3	0.163	0.15	0.271332	0.658135	0
3	91131528	91284630	ENSBTAG00000016990	USP24	0.688	0.127	6.66409e-08	7.62135e-06	0
3	91411766	91445037	ENSBTAG00000004688	DHCR24	0.072	0.081	0.374003	0.764691	0
3	91528851	91530803	ENSBTAG00000040313	PARS2	0.138	0.177	0.435391	0.801426	0
3	91536057	91564769	ENSBTAG00000015931	TTC4	0.404	0.242	0.0891309	0.421769	0
3	91689838	91739355	ENSBTAG00000039686	ACOT11	-0.016	0.064	0.802587	0.953243	0
3	91841230	92006821	ENSBTAG00000010717	SSBP3	0.134	0.109	0.230139	0.617591	0
3	92016377	92033861	ENSBTAG00000010715	MRPL37	-0.009	0.174	0.958529	0.993185	0
3	92033900	92060024	ENSBTAG00000020037	CYB5RL	0.081	0.114	0.477084	0.826923	0
3	92133467	92177725	ENSBTAG00000009527	TCEANC2	-0.035	0.189	0.853229	0.965588	0
3	92177759	92203031	ENSBTAG00000009526	TMEM59	0.085	0.132	0.519575	0.845505	0
3	92211535	92220923	ENSBTAG00000024195	LDLRAD1	-0.05	0.042	0.230139	0.617591	0
3	92241241	92262728	ENSBTAG00000019198	LRRC42	0.02	0.139	0.8855	0.974441	0
3	92263079	92296401	ENSBTAG00000007112	HSPB11	-0.025	0.142	0.860294	0.967682	0
3	92329344	92382078	ENSBTAG00000050962	YIPF1	-0.142	0.218	0.515046	0.84316	0
3	92391225	92452345	ENSBTAG00000006625	NDC1	0.002	0.179	0.991223	0.998057	0
3	92919163	92996508	ENSBTAG00000000736	LRP8	0.058	0.1	0.561915	0.863946	0
3	93003032	93012322	ENSBTAG00000003485	MAGOH	-0.106	0.167	0.525428	0.847794	0
3	93032987	93057118	ENSBTAG00000014649	CPT2	0.206	0.198	0.317311	0.726324	0
3	93157902	93175464	ENSBTAG00000012514	PODN	-0.084	0.076	0.271332	0.658135	0
3	93275045	93393567	ENSBTAG00000003746	SCP2	0.058	0.117	0.619894	0.888665	0
3	93434006	93464715	ENSBTAG00000002910	ECHDC2	-0.055	0.128	0.667196	0.907145	0
3	93541281	93615853	ENSBTAG00000019680	ZYG11B	-0.15	0.14	0.271332	0.658135	0
3	93648200	93667733	ENSBTAG00000002050	COA7	0.07	0.071	0.324133	0.734114	0
3	93742043	93749741	ENSBTAG00000018281	GPX7	0.018	0.089	0.839917	0.960926	0
3	93934635	93956227	ENSBTAG00000002720	PRPF38A	-0.28	0.165	0.0891309	0.421769	0
3	93998822	94011885	ENSBTAG00000015896	CC2D1B	0.644	0.19	0.000673859	0.0207708	0
3	94018750	94201518	ENSBTAG00000014289	ZFYVE9	-0.022	0.153	0.8855	0.974441	0
3	94255802	94278300	ENSBTAG00000011025	BTF3L4	0.047	0.17	0.782548	0.946343	0
3	94278884	94312525	ENSBTAG00000011024	TXNDC12	0.116	0.174	0.504772	0.837772	0
3	94437449	94540296	ENSBTAG00000021174	NRDC	-0.176	0.254	0.48831	0.83284	0
3	94541126	94702613	ENSBTAG00000021170	OSBPL9	0.001	0.145	0.994415	0.998249	0
3	94802846	94942191	ENSBTAG00000005542	EPS15	0.196	0.129	0.133614	0.501085	0
3	94953364	95003162	ENSBTAG00000002451	TTC39A	0.165	0.127	0.193601	0.577546	0
3	95012096	95059039	ENSBTAG00000054545	RNF11	-0.181	0.165	0.271332	0.658135	0
3	95337691	95342769	ENSBTAG00000011059	CDKN2C	0.174	0.092	0.0574331	0.341833	0
3	95351469	95849104	ENSBTAG00000014482	FAF1	0.193	0.147	0.193601	0.577546	0
3	97468115	97518125	ENSBTAG00000009209	BEND5	0.267	0.107	0.0124193	0.15137	0
3	97776435	97942867	ENSBTAG00000003128	SPATA6	-0.175	0.086	0.0455003	0.304255	0
3	97963204	98001735	ENSBTAG00000014225	SLC5A9	-0.006	0.089	0.946582	0.990197	0
3	98278655	98494949	ENSBTAG00000054324	TRABD2B	0.006	0.044	0.891821	0.976836	0
3	98887940	98924294	ENSBTAG00000019956	CMPK1	-0.23	0.105	0.0278069	0.233704	0
3	98940131	98990375	ENSBTAG00000017844	STIL	-0.166	0.105	0.109599	0.460088	0
3	99005834	99022661	ENSBTAG00000005029	TAL1	0.369	0.152	0.0163951	0.175834	0
3	99025649	99050629	ENSBTAG00000002555	PDZK1IP1	-0.06	0.029	0.0357288	0.268394	0
3	99337603	99358612	ENSBTAG00000011976	CYP4B1	-0.041	0.019	0.0278069	0.233704	0
3	99421569	99457891	ENSBTAG00000000097	EFCAB14	-0.763	0.193	6.33425e-05	0.00324319	0
3	99466613	99491947	ENSBTAG00000000094	ATPAF1	-0.31	0.188	0.109599	0.460088	0
3	99514446	99523394	ENSBTAG00000023551	MOB3C	0.124	0.112	0.271332	0.658135	0
3	99527442	99573233	ENSBTAG00000019933	MKNK1	0.438	0.118	0.000215599	0.00885332	0
3	99716645	99737813	ENSBTAG00000007507	FAAH	0.221	0.103	0.0357288	0.268394	0
3	99750594	99773411	ENSBTAG00000015891	NSUN4	-0.241	0.178	0.161513	0.539421	0
3	99790133	99799010	ENSBTAG00000009603	UQCRH	-0.15	0.136	0.271332	0.658135	0
3	99799405	99817768	ENSBTAG00000045664	LRRC41	-0.058	0.212	0.784085	0.947171	0
3	99817882	99844140	ENSBTAG00000019901	RAD54L	0.195	0.083	0.0214482	0.20425	0
3	99869871	99894001	ENSBTAG00000013322	POMGNT1	-0.086	0.223	0.699497	0.917541	0
3	99870307	99881509	ENSBTAG00000024144	LURAP1	0.133	0.082	0.109599	0.460088	0
3	99895907	99901044	ENSBTAG00000013320	TSPAN1	0.022	0.046	0.63265	0.893862	0
3	99963094	100063831	ENSBTAG00000002979	PIK3R3	0.107	0.111	0.335046	0.739931	0
3	100071214	100278380	ENSBTAG00000020444	MAST2	0.109	0.157	0.487682	0.832557	0
3	100332768	100369992	ENSBTAG00000016377	IPP	-0.38	0.173	0.0278069	0.233704	0
3	100376675	100378679	ENSBTAG00000052979	TMEM69	-0.051	0.139	0.713619	0.924471	0
3	100418895	100453755	ENSBTAG00000008810	GPBP1L1	-0.216	0.17	0.193601	0.577546	0
3	100455525	100459138	ENSBTAG00000008808	CCDC17	0.254	0.165	0.133614	0.501085	0
3	100461046	100505190	ENSBTAG00000015346	NASP	-0.212	0.173	0.230139	0.617591	0
3	100505194	100517388	ENSBTAG00000000497	AKR1A1	-0.162	0.123	0.193601	0.577546	0
3	100550576	100565166	ENSBTAG00000003642	PRDX1	-0.393	0.118	0.000966848	0.0273241	0
3	100566182	100571190	ENSBTAG00000017027	MMACHC	-0.088	0.102	0.388137	0.772424	0
3	100579652	100718934	ENSBTAG00000011244	TESK2	0.064	0.184	0.72784	0.929124	1
3	100717214	100731168	ENSBTAG00000011243	TOE1	-0.466	0.222	0.0357288	0.268394	0
3	100722449	100731011	ENSBTAG00000011242	MUTYH	-0.013	0.135	0.923521	0.984075	0
3	100731586	100733237	ENSBTAG00000011241	HPDL	-0.082	0.063	0.193601	0.577546	0
3	100852666	101009999	ENSBTAG00000012648	ZSWIM5	-0.117	0.09	0.193601	0.577546	0
3	101012745	101037592	ENSBTAG00000012644	UROD	-0.041	0.159	0.796407	0.95135	0
3	101040409	101048376	ENSBTAG00000019013	HECTD3	0.447	0.22	0.0455003	0.304255	0
3	101059206	101173067	ENSBTAG00000019010	EIF2B3	-0.174	0.216	0.420243	0.791887	0
3	101179099	101195422	ENSBTAG00000024137	PTCH2	0.052	0.057	0.361769	0.757653	0
3	101200435	101205864	ENSBTAG00000039529	BTBD19	-0.123	0.101	0.230139	0.617591	0
3	101208672	101213711	ENSBTAG00000006125	PLK3	0.021	0.064	0.742912	0.934808	0
3	101225985	101229638	ENSBTAG00000015288	BEST4	-0.044	0.065	0.498406	0.835822	0
3	101232560	101235265	ENSBTAG00000015285	RPS8	-0.121	0.143	0.397553	0.779124	0
3	101354615	101378938	ENSBTAG00000012372	TMEM53	-0.194	0.1	0.0574331	0.341833	0
3	101373593	101645892	ENSBTAG00000012355	RNF220	-0.179	0.248	0.470294	0.824734	0
3	101700924	101832084	ENSBTAG00000015559	ERI3	0.022	0.272	0.935442	0.987224	0
3	101832496	101841691	ENSBTAG00000005912	DMAP1	0.047	0.207	0.820424	0.956569	0
3	102033426	102065123	ENSBTAG00000008690	SLC6A9	0.031	0.061	0.611453	0.884648	0
3	102069299	102079762	ENSBTAG00000011879	B4GALT2	0.025	0.112	0.823536	0.956569	0
3	102080670	102084006	ENSBTAG00000018889	ATP6V0B	-0.103	0.145	0.477704	0.827295	0
3	102085998	102089568	ENSBTAG00000018888	DPH2	0.019	0.094	0.839917	0.960926	0
3	102090696	102111545	ENSBTAG00000018887	IPO13	0.201	0.122	0.109599	0.460088	0
3	102126891	102311428	ENSBTAG00000017656	ST3GAL3	0.073	0.076	0.336552	0.741251	0
3	102343085	102382969	ENSBTAG00000002078	KDM4A	0.303	0.193	0.109599	0.460088	0
3	102414018	102498351	ENSBTAG00000000253	PTPRF	0.145	0.1	0.161513	0.539421	0
3	102573104	102575815	ENSBTAG00000005583	HYI	0.038	0.124	0.759605	0.939005	0
3	102576579	102603276	ENSBTAG00000005580	SZT2	0.118	0.076	0.109599	0.460088	0
3	102629291	102654464	ENSBTAG00000016899	ELOVL1	-0.067	0.185	0.717352	0.925291	0
3	102655232	102659704	ENSBTAG00000009819	CDC20	-0.018	0.072	0.802587	0.953243	0
3	102694863	102714614	ENSBTAG00000003777	TIE1	0.058	0.109	0.594726	0.878626	0
3	102741183	102744239	ENSBTAG00000021079	C3H1orf210	-0.134	0.118	0.271332	0.658135	0
3	102754385	102756240	ENSBTAG00000021082	TMEM125	0.03	0.112	0.788699	0.948812	0
3	102838619	102846235	ENSBTAG00000021544	EBNA1BP2	-0.21	0.193	0.271332	0.658135	0
3	103309039	103337423	ENSBTAG00000009617	SLC2A1	0.033	0.11	0.764177	0.939539	0
3	103390078	103395435	ENSBTAG00000016028	ZNF691	0.557	0.18	0.00193521	0.0465248	0
3	103401320	103454750	ENSBTAG00000017387	TMEM269	0.171	0.093	0.0718606	0.378219	0
3	103432470	103438943	ENSBTAG00000017388	SVBP	-0.158	0.148	0.271332	0.658135	0
3	103464627	103471995	ENSBTAG00000017386	C3H1orf50	0.049	0.18	0.785622	0.947812	0
3	103472227	103491724	ENSBTAG00000017382	P3H1	0.316	0.112	0.00511026	0.0879525	0
3	103521364	103539465	ENSBTAG00000017368	YBX1	-0.014	0.154	0.927493	0.985305	0
3	103540446	103565396	ENSBTAG00000004590	PPIH	-0.09	0.2	0.65271	0.9031	0
3	103567783	103700789	ENSBTAG00000004585	CCDC30	0.149	0.097	0.133614	0.501085	0
3	103717321	103720404	ENSBTAG00000012982	PPCS	0.491	0.221	0.0278069	0.233704	0
3	103775476	103807656	ENSBTAG00000017502	RIMKLA	0.081	0.039	0.0357288	0.268394	0
3	103880098	104004083	ENSBTAG00000015887	FOXJ3	0.98	0.137	6.02126e-13	1.84205e-10	0
3	104538208	104671493	ENSBTAG00000020745	HIVEP3	-0.064	0.077	0.405974	0.7843	1
3	104965053	105188608	ENSBTAG00000001629	SCMH1	-0.236	0.232	0.317311	0.726324	0
3	105195223	105198693	ENSBTAG00000001628	SLFNL1	0.103	0.072	0.161513	0.539421	0
3	105201098	105280146	ENSBTAG00000001626	CTPS1	0.303	0.088	0.000673859	0.0207708	0
3	105348797	105350137	ENSBTAG00000015113	CITED4	-0.049	0.083	0.555191	0.862128	0
3	105375258	105433489	ENSBTAG00000002644	KCNQ4	-0.042	0.054	0.436569	0.801665	0
3	105445057	105510073	ENSBTAG00000021943	NFYC	-0.097	0.316	0.758843	0.939005	0
3	105547552	105567515	ENSBTAG00000018726	RIMS3	0.155	0.121	0.193601	0.577546	0
3	105615007	105622276	ENSBTAG00000000533	ZNF684	-0.094	0.087	0.271332	0.658135	0
3	105632530	105644310	ENSBTAG00000000532	EXO5	-0.009	0.103	0.930672	0.98637	0
3	105658238	105673151	ENSBTAG00000039287	ZFP69	0.003	0.205	0.988032	0.997159	0
3	105710017	105757346	ENSBTAG00000021922	SMAP2	0.118	0.125	0.34517	0.746447	0
3	105824376	105867157	ENSBTAG00000044178	ZMPSTE24	0.044	0.142	0.756561	0.938568	0
3	105894662	105974325	ENSBTAG00000019695	RLF	0.011	0.128	0.931466	0.986443	0
3	106020188	106037050	ENSBTAG00000013367	PPT1	-0.235	0.179	0.193601	0.577546	0
3	106037116	106066200	ENSBTAG00000013363	CAP1	0.379	0.264	0.161513	0.539421	0
3	106122567	106136408	ENSBTAG00000013054	MFSD2A	0.019	0.062	0.759605	0.939005	0
3	106185440	106192263	ENSBTAG00000054059	MYCL	-0.033	0.075	0.659937	0.905951	0
3	106204847	106248823	ENSBTAG00000013832	TRIT1	-0.562	0.158	0.000318217	0.0118359	0
3	106328186	106344433	ENSBTAG00000047314	PPIE	-0.657	0.175	0.000144696	0.00643871	0
3	106442589	106458224	ENSBTAG00000008688	HEYL	0.092	0.074	0.230139	0.617591	0
3	106494310	106507737	ENSBTAG00000017125	PABPC4	0.122	0.155	0.431282	0.799151	0
3	106591094	106927295	ENSBTAG00000021024	MACF1	0.016	0.115	0.88945	0.975812	0
3	106970587	106976098	ENSBTAG00000010232	NDUFS5	-0.143	0.138	0.317311	0.726324	0
3	106986685	106998848	ENSBTAG00000004715	AKIRIN1	-0.149	0.183	0.415645	0.789737	0
3	107046910	107104902	ENSBTAG00000008023	RHBDL2	0.095	0.136	0.484552	0.831039	0
3	107109148	107110689	ENSBTAG00000030338	GJA9	-0.092	0.083	0.271332	0.658135	0
3	107111822	107117831	ENSBTAG00000030337	MYCBP	-0.119	0.119	0.317311	0.726324	0
3	107121920	107136338	ENSBTAG00000009368	RRAGC	-0.208	0.212	0.326593	0.735763	0
3	107941137	107957939	ENSBTAG00000002306	UTP11	-0.274	0.159	0.0891309	0.421769	0
3	107959452	107967135	ENSBTAG00000007300	FHL3	0.078	0.069	0.271332	0.658135	0
3	107971020	107997728	ENSBTAG00000007299	SF3A3	-0.312	0.258	0.230139	0.617591	0
3	108007865	108062243	ENSBTAG00000024107	INPP5B	0.003	0.202	0.988032	0.997159	0
3	108063039	108103478	ENSBTAG00000006511	MTF1	0.15	0.15	0.317311	0.726324	0
3	108109004	108114061	ENSBTAG00000006510	YRDC	0.048	0.136	0.724088	0.928305	0
3	108113644	108120963	ENSBTAG00000046989	MANEAL	-0.205	0.109	0.0574331	0.341833	1
3	108213369	108220804	ENSBTAG00000014325	C3H1orf109	0.069	0.242	0.775644	0.943958	0
3	108305087	108331447	ENSBTAG00000003849	GNL2	0.006	0.26	0.98165	0.996272	0
3	108338106	108355571	ENSBTAG00000016852	SNIP1	-0.25	0.177	0.161513	0.539421	0
3	108368074	108392514	ENSBTAG00000010506	MEAF6	-0.158	0.202	0.434215	0.801189	0
3	108403027	108412520	ENSBTAG00000011316	ZC3H12A	0.107	0.085	0.193601	0.577546	0
3	108832486	109076297	ENSBTAG00000009269	GRIK3	-0.029	0.061	0.634787	0.89564	0
3	109431030	109437161	ENSBTAG00000024097	MRPS15	-0.159	0.133	0.230139	0.617591	0
3	109442372	109471653	ENSBTAG00000007994	OSCP1	0.164	0.096	0.0891309	0.421769	0
3	109482124	109484586	ENSBTAG00000024096	LSM10	-0.102	0.114	0.370787	0.762575	0
3	109490894	109528385	ENSBTAG00000015969	STK40	0.112	0.098	0.271332	0.658135	0
3	109535132	109537474	ENSBTAG00000014358	EVA1B	-0.023	0.11	0.834448	0.958973	0
3	109537600	109551436	ENSBTAG00000038617	SH3D21	0.05	0.078	0.521523	0.845505	0
3	109552463	109625086	ENSBTAG00000024095	THRAP3	0.198	0.304	0.515046	0.84316	0
3	109649571	109671174	ENSBTAG00000030301	MAP7D1	0.072	0.1	0.471525	0.825	0
3	109676148	109691945	ENSBTAG00000005732	TRAPPC3	0.013	0.182	0.943398	0.989403	0
3	109696709	109721078	ENSBTAG00000010175	COL8A2	0.043	0.054	0.426032	0.795203	0
3	109728960	109733363	ENSBTAG00000021714	TEKT2	-0.032	0.076	0.673755	0.908111	0
3	109752058	109872871	ENSBTAG00000018324	AGO3	-0.216	0.1	0.0278069	0.233704	0
3	109877713	109914109	ENSBTAG00000012253	AGO1	0.088	0.141	0.532628	0.849884	0
3	109947115	109977492	ENSBTAG00000015220	AGO4	-0.123	0.138	0.372929	0.764539	0
3	110021003	110047343	ENSBTAG00000002826	CLSPN	-0.018	0.06	0.764177	0.939539	0
3	110065619	110066302	ENSBTAG00000038292	C3H1orf216	-0.083	0.086	0.334545	0.739931	0
3	110137178	110174112	ENSBTAG00000002377	PSMB2	0.03	0.193	0.876821	0.971802	0
3	110202070	110210854	ENSBTAG00000016696	NCDN	0.075	0.069	0.271332	0.658135	0
3	110214078	110307266	ENSBTAG00000016694	KIAA0319L	0.008	0.186	0.965702	0.994891	0
3	110330490	110491582	ENSBTAG00000021023	ZMYM4	-0.182	0.129	0.161513	0.539421	0
3	110557888	110571478	ENSBTAG00000016328	SFPQ	-0.364	0.231	0.109599	0.460088	0
3	110581767	110623103	ENSBTAG00000006555	ZMYM1	-0.271	0.139	0.0574331	0.341833	0
3	110648270	110694255	ENSBTAG00000021948	ZMYM6	0.291	0.189	0.133614	0.501085	0
3	110694718	110698693	ENSBTAG00000024086	TMEM35B	-0.197	0.106	0.0574331	0.341833	0
3	110835276	110839536	ENSBTAG00000014235	SMIM12	0.259	0.12	0.0278069	0.233704	0
3	110888198	110890904	ENSBTAG00000013881	GJA4	-0.031	0.098	0.752003	0.937475	1
3	112322230	112338096	ENSBTAG00000019555	ZSCAN20	-0.084	0.181	0.642648	0.899883	0
3	112396168	112440870	ENSBTAG00000014596	EFHD1	0.081	0.13	0.533285	0.850046	0
3	112454968	112584264	ENSBTAG00000014079	GIGYF2	0.346	0.191	0.0718606	0.378219	0
3	112513879	112521623	ENSBTAG00000005858	KCNJ13	0.021	0.03	0.483927	0.831039	1
3	112604179	112606901	ENSBTAG00000018058	SNORC	-0.008	0.025	0.748968	0.936268	0
3	112609162	112657496	ENSBTAG00000008942	NGEF	-0.037	0.028	0.193601	0.577546	0
3	112794123	112931963	ENSBTAG00000020173	INPP5D	-0.125	0.097	0.193601	0.577546	0
3	112967754	113012711	ENSBTAG00000003928	ATG16L1	0.33	0.209	0.109599	0.460088	0
3	113023696	113054163	ENSBTAG00000021480	SAG	-0.022	0.067	0.742912	0.934808	0
3	113062330	113172640	ENSBTAG00000020616	DGKD	0.099	0.111	0.372393	0.76408	0
3	113167613	113257470	ENSBTAG00000000149	USP40	-0.313	0.251	0.230139	0.617591	0
3	113516126	113528914	ENSBTAG00000024726	HJURP	0.012	0.038	0.752003	0.937475	0
3	113586057	113672155	ENSBTAG00000014652	TRPM8	-0.014	0.06	0.815761	0.956569	0
3	114535147	114633955	ENSBTAG00000013869	SH3BP4	-0.137	0.134	0.317311	0.726324	0
3	115044731	115604936	ENSBTAG00000016504	AGAP1	-0.043	0.121	0.72259	0.927939	0
3	116025262	116037482	ENSBTAG00000018424	ACKR3	-0.03	0.054	0.578211	0.870625	0
3	116552174	116565322	ENSBTAG00000005854	COPS8	-0.254	0.199	0.193601	0.577546	0
3	116782465	116855219	ENSBTAG00000030190	COL6A3	-0.005	0.072	0.94499	0.990197	0
3	116959554	117005443	ENSBTAG00000000634	MLPH	0.025	0.039	0.521523	0.845505	0
3	117020666	117043357	ENSBTAG00000017624	RAB17	0.385	0.067	1.19807e-08	1.64728e-06	0
3	117074081	117235735	ENSBTAG00000005354	LRRFIP1	0.119	0.142	0.402031	0.78189	0
3	117279522	117320622	ENSBTAG00000011534	RAMP1	-0.029	0.039	0.456876	0.815937	0
3	117354167	117399773	ENSBTAG00000026114	UBE2F	-0.048	0.124	0.698756	0.91716	0
3	117410453	117441217	ENSBTAG00000017826	SCLY	-0.023	0.127	0.856368	0.966286	0
3	117441783	117464352	ENSBTAG00000010164	ESPNL	-0.038	0.067	0.570714	0.867988	0
3	117501464	117526261	ENSBTAG00000010176	ILKAP	0.525	0.236	0.0278069	0.233704	0
3	117558885	117599971	ENSBTAG00000001879	PER2	0.096	0.064	0.133614	0.501085	0
3	117639171	117699247	ENSBTAG00000015973	TRAF3IP1	0.472	0.2	0.0163951	0.175834	0
3	117716651	117735517	ENSBTAG00000003376	ASB1	0.075	0.135	0.578211	0.870625	1
3	118051375	118103633	ENSBTAG00000021444	TWIST2	-0.056	0.053	0.271332	0.658135	0
3	118225398	118462734	ENSBTAG00000017764	HDAC4	-0.141	0.105	0.193601	0.577546	0
3	118884975	118923959	ENSBTAG00000003279	NDUFA10	0.198	0.157	0.193601	0.577546	0
3	119425809	119430912	ENSBTAG00000045948	CSF2RA	-0.068	0.146	0.641216	0.899215	0
3	119577914	119585327	ENSBTAG00000054242	AKAP17A	0.266	0.192	0.161513	0.539421	0
3	119662082	119666681	ENSBTAG00000010910	COPS9	0.036	0.132	0.784853	0.947258	0
3	119863649	119891441	ENSBTAG00000015996	GPC1	0.115	0.113	0.317311	0.726324	0
3	119952858	119954650	ENSBTAG00000049766	DUSP28	-0.206	0.146	0.161513	0.539421	0
3	119958670	119967450	ENSBTAG00000007215	RNPEPL1	-0.006	0.068	0.929877	0.98604	0
3	119973442	119983832	ENSBTAG00000002809	CAPN10	-0.061	0.118	0.605156	0.882108	0
3	120005503	120020505	ENSBTAG00000030193	GPR35	-0.136	0.074	0.0718606	0.378219	0
3	120040007	120127795	ENSBTAG00000011538	KIF1A	0.007	0.054	0.896566	0.97888	0
3	120153536	120164464	ENSBTAG00000005797	AGXT	-0.055	0.027	0.0455003	0.304255	0
3	120194352	120234324	ENSBTAG00000005168	CROCC2	-0.027	0.049	0.581634	0.8732	1
3	120284114	120324147	ENSBTAG00000014132	SNED1	-0.057	0.06	0.342112	0.744519	0
3	120329405	120335084	ENSBTAG00000000784	MTERF4	-0.08	0.302	0.791009	0.950283	0
3	120335887	120364423	ENSBTAG00000000785	PASK	-0.128	0.085	0.133614	0.501085	0
3	120373077	120389112	ENSBTAG00000000789	PPP1R7	-0.084	0.143	0.557204	0.862128	0
3	120423895	120482640	ENSBTAG00000004315	HDLBP	0.016	0.153	0.916376	0.983485	0
3	120512441	120612106	ENSBTAG00000013110	FARP2	0.032	0.138	0.816538	0.956569	0
3	120612526	120622330	ENSBTAG00000009676	STK25	0.292	0.165	0.0718606	0.378219	0
3	120646406	120658685	ENSBTAG00000008711	BOK	-0.001	0.08	0.989628	0.997782	0
3	120665994	120709495	ENSBTAG00000013253	THAP4	0.34	0.191	0.0718606	0.378219	0
3	120710007	120725948	ENSBTAG00000015401	ATG4B	-0.059	0.13	0.649829	0.902401	0
3	120728099	120736657	ENSBTAG00000015408	DTYMK	0.018	0.085	0.832107	0.958533	0
3	120743885	120760644	ENSBTAG00000009123	ING5	0.258	0.193	0.193601	0.577546	0
3	120765583	120791784	ENSBTAG00000002847	D2HGDH	0.013	0.109	0.905275	0.980081	0
3	120837823	120848740	ENSBTAG00000011543	PDCD1	-0.014	0.058	0.809555	0.954662	0
4	4582609	4879280	ENSBTAG00000023806	COBL	-0.051	0.118	0.665741	0.907145	0
4	5106065	5327013	ENSBTAG00000017086	GRB10	-0.172	0.159	0.271332	0.658135	0
4	5336436	5441308	ENSBTAG00000020869	DDC	0.029	0.039	0.456876	0.815937	0
4	5505954	5599101	ENSBTAG00000014016	IKZF1	-0.015	0.174	0.931466	0.986443	0
4	7937943	8616503	ENSBTAG00000048664	CDK14	-0.071	0.095	0.455064	0.814839	0
4	8665915	8670064	ENSBTAG00000002107	FZD1	0.016	0.071	0.821979	0.956569	0
4	9247873	9254862	ENSBTAG00000045617	MTERF1	0.296	0.149	0.0455003	0.304255	0
4	9333128	9455572	ENSBTAG00000007442	AKAP9	-0.069	0.092	0.453255	0.813624	0
4	9459764	9476713	ENSBTAG00000001992	CYP51A1	0.108	0.079	0.161513	0.539421	0
4	9528416	9567814	ENSBTAG00000002750	KRIT1	0.024	0.163	0.883132	0.97412	0
4	9624288	9725826	ENSBTAG00000034936	ANKIB1	-0.406	0.204	0.0455003	0.304255	0
4	9764439	9772218	ENSBTAG00000021996	GATAD1	0.014	0.115	0.902899	0.980013	0
4	9789227	9870626	ENSBTAG00000024431	PEX1	0.116	0.159	0.46539	0.821076	0
4	9870503	9877234	ENSBTAG00000018363	RBM48	0.123	0.159	0.438931	0.802991	0
4	9939646	10188536	ENSBTAG00000044023	CDK6	-0.194	0.099	0.0455003	0.304255	0
4	10449812	10468917	ENSBTAG00000053050	SAMD9	-0.122	0.094	0.193601	0.577546	0
4	10541020	10595196	ENSBTAG00000012456	HEPACAM2	0.058	0.06	0.333544	0.739282	0
4	10600800	10732873	ENSBTAG00000014255	VPS50	-0.074	0.136	0.586441	0.875223	0
4	11204075	11208760	ENSBTAG00000015844	TFPI2	-0.042	0.098	0.667923	0.907145	0
4	11242533	11247552	ENSBTAG00000000820	GNG11	0.141	0.136	0.317311	0.726324	0
4	11330484	11345143	ENSBTAG00000003424	BET1	-0.157	0.13	0.230139	0.617591	0
4	11776554	11812997	ENSBTAG00000013472	COL1A2	-0.086	0.054	0.109599	0.460088	0
4	11886419	11939978	ENSBTAG00000009109	CASD1	0.022	0.118	0.852445	0.96542	0
4	11992415	12063687	ENSBTAG00000021282	SGCE	0.005	0.115	0.965702	0.994891	0
4	12063954	12076656	ENSBTAG00000053735	PEG10	0.015	0.05	0.764177	0.939539	0
4	12191129	12534305	ENSBTAG00000024426	PPP1R9A	-0.045	0.092	0.624842	0.890127	0
4	12593909	12631421	ENSBTAG00000034645	PON3	0.264	0.048	3.79791e-08	4.79124e-06	0
4	12645430	12673193	ENSBTAG00000008361	PON2	0.203	0.179	0.271332	0.658135	0
4	12881889	12895362	ENSBTAG00000014069	PDK4	-0.045	0.081	0.578211	0.870625	0
4	13462646	13692192	ENSBTAG00000003773	SLC25A13	0.23	0.124	0.0574331	0.341833	0
4	14054960	14079935	ENSBTAG00000052508	SEM1	-0.013	0.162	0.936237	0.987224	0
4	14476805	14567618	ENSBTAG00000015925	SDHAF3	0.17	0.14	0.230139	0.617591	0
4	15128694	15276513	ENSBTAG00000003222	ASNS	0.23	0.091	0.0124193	0.15137	0
4	15276632	15320627	ENSBTAG00000004995	C1GALT1	0.371	0.107	0.000465258	0.0158149	0
4	15634972	15672063	ENSBTAG00000013781	MIOS	0.168	0.141	0.230139	0.617591	0
4	15692488	15695690	ENSBTAG00000013168	RPA3	0.089	0.117	0.446657	0.8101	0
4	15734909	15991563	ENSBTAG00000047004	UMAD1	0.425	0.153	0.00511026	0.0879525	0
4	16051521	16156180	ENSBTAG00000008533	GLCCI1	-0.124	0.12	0.317311	0.726324	0
4	16192292	16355628	ENSBTAG00000000799	ICA1	0.267	0.171	0.109599	0.460088	0
4	19041321	19049196	ENSBTAG00000011145	NDUFA4	-0.071	0.093	0.445463	0.809134	0
4	19065677	19077110	ENSBTAG00000011819	PHF14	-0.138	0.147	0.347731	0.746447	0
4	19514202	19990379	ENSBTAG00000007680	THSD7A	-0.237	0.104	0.0214482	0.20425	0
4	20366146	20388726	ENSBTAG00000019750	TMEM106B	0.047	0.108	0.663562	0.906535	0
4	20624426	20703669	ENSBTAG00000009786	SCIN	0.147	0.068	0.0278069	0.233704	0
4	20764660	20766198	ENSBTAG00000002869	ARL4A	-0.439	0.109	6.33425e-05	0.00324319	0
4	22099728	22195687	ENSBTAG00000015981	ETV1	0.156	0.067	0.0214482	0.20425	0
4	23557610	23947179	ENSBTAG00000034154	AGMO	-0.069	0.051	0.161513	0.539421	0
4	23999242	24075104	ENSBTAG00000003238	MEOX2	0.043	0.127	0.73461	0.932029	0
4	25025019	25084046	ENSBTAG00000034091	LRRC72	-0.063	0.082	0.442487	0.805641	0
4	25090913	25130458	ENSBTAG00000010980	ANKMY2	-0.165	0.146	0.271332	0.658135	0
4	25130690	25193513	ENSBTAG00000014262	BZW2	-0.526	0.124	2.66915e-05	0.00164962	0
4	25245149	25283286	ENSBTAG00000012805	TSPAN13	-0.063	0.113	0.576844	0.870495	0
4	25290663	25304186	ENSBTAG00000024406	AGR2	-0.004	0.064	0.950563	0.992071	0
4	25805796	25855901	ENSBTAG00000007746	AHR	0.043	0.109	0.693581	0.915177	0
4	26324012	26469689	ENSBTAG00000014074	SNX13	-0.195	0.112	0.0891309	0.421769	0
4	27093041	27667961	ENSBTAG00000003808	HDAC9	0.031	0.09	0.730846	0.930341	0
4	27817880	27819874	ENSBTAG00000046922	TWIST1	0.057	0.077	0.4593	0.817283	0
4	28790424	28886703	ENSBTAG00000003751	MACC1	0.188	0.093	0.0455003	0.304255	0
4	29024090	29115760	ENSBTAG00000003709	ITGB8	0.088	0.069	0.193601	0.577546	0
4	30225647	30305513	ENSBTAG00000014389	SP4	0.026	0.108	0.809555	0.954662	1
4	30692956	30904166	ENSBTAG00000004976	CDCA7L	-0.493	0.132	0.000215599	0.00885332	0
4	30909069	31143356	ENSBTAG00000015539	RAPGEF5	-0.063	0.083	0.447853	0.810226	0
4	31454749	31459131	ENSBTAG00000014921	IL6	0.058	0.043	0.193601	0.577546	0
4	31520444	31527812	ENSBTAG00000051150	TOMM7	0.299	0.143	0.0357288	0.268394	0
4	31618071	31751438	ENSBTAG00000004575	FAM126A	0.162	0.111	0.133614	0.501085	0
4	31768332	31824070	ENSBTAG00000016010	KLHL7	0.436	0.162	0.00693395	0.103603	0
4	31876899	31903130	ENSBTAG00000000604	GPNMB	-0.056	0.041	0.161513	0.539421	0
4	31917458	31942803	ENSBTAG00000019403	MALSU1	-0.185	0.23	0.421397	0.792475	0
4	31943617	32088119	ENSBTAG00000019406	IGF2BP3	-0.01	0.057	0.86108	0.967943	0
4	32116515	32135318	ENSBTAG00000012622	TRA2A	-0.111	0.163	0.495871	0.835183	0
4	32217367	32259874	ENSBTAG00000013010	CCDC126	0.276	0.142	0.0574331	0.341833	0
4	32287899	32315089	ENSBTAG00000014711	DBF4	-0.13	0.102	0.193601	0.577546	0
4	32315217	32394916	ENSBTAG00000054987	SLC25A40	-0.056	0.187	0.76494	0.939816	0
4	32564174	32731459	ENSBTAG00000021313	RUNDC3B	0.068	0.084	0.41794	0.789737	0
4	33006669	33080056	ENSBTAG00000005653	ABCB4	-0.022	0.04	0.582319	0.873586	0
4	33083035	33144192	ENSBTAG00000021535	CROT	0.013	0.068	0.848526	0.964373	0
4	33226967	33248624	ENSBTAG00000038283	TMEM243	0.217	0.2	0.271332	0.658135	0
4	33249637	33286857	ENSBTAG00000020878	DMTF1	0.011	0.182	0.952156	0.992488	0
4	35390232	35616774	ENSBTAG00000024394	SEMA3D	0.058	0.052	0.271332	0.658135	0
4	36254736	36631147	ENSBTAG00000018133	SEMA3A	-0.034	0.057	0.551175	0.861176	0
4	36966817	37237011	ENSBTAG00000014920	SEMA3E	-0.109	0.077	0.161513	0.539421	0
4	37450375	37838804	ENSBTAG00000017350	PCLO	0.069	0.034	0.0455003	0.304255	0
4	38152730	38673177	ENSBTAG00000020569	CACNA2D1	-0.306	0.111	0.00511026	0.0879525	0
4	38929386	39010999	ENSBTAG00000017664	HGF	-0.195	0.083	0.0214482	0.20425	0
4	39939436	40145312	ENSBTAG00000006138	SEMA3C	0.105	0.08	0.193601	0.577546	0
4	40380301	40443336	ENSBTAG00000017866	CD36	0.077	0.073	0.271332	0.658135	0
4	40956253	41062151	ENSBTAG00000002714	GNAI1	0.152	0.116	0.193601	0.577546	0
4	43312172	43449891	ENSBTAG00000005102	PHTF2	0	0.115	1	1	0
4	43450254	43454105	ENSBTAG00000033290	TMEM60	-0.049	0.12	0.683274	0.911291	0
4	43464283	43548241	ENSBTAG00000015753	RSBN1L	-0.038	0.146	0.794864	0.950992	0
4	43598679	43690863	ENSBTAG00000003825	PTPN12	-0.301	0.155	0.0574331	0.341833	0
4	43815426	43913447	ENSBTAG00000018430	GSAP	-0.412	0.134	0.00193521	0.0465248	0
4	43916446	44057818	ENSBTAG00000009341	CCDC146	0.032	0.087	0.712873	0.92419	0
4	44000211	44004848	ENSBTAG00000009717	FGL2	-0.109	0.091	0.230139	0.617591	0
4	44057955	44133423	ENSBTAG00000014879	FAM185A	0.361	0.133	0.00693395	0.103603	0
4	44155991	44279731	ENSBTAG00000024379	LRRC17	-0.277	0.075	0.000215599	0.00885332	0
4	44363508	44428499	ENSBTAG00000014161	ARMC10	-0.27	0.177	0.133614	0.501085	0
4	44427825	44517650	ENSBTAG00000014171	NAPEPLD	0.147	0.113	0.193601	0.577546	0
4	44516585	44531440	ENSBTAG00000006876	PMPCB	0.039	0.17	0.818869	0.956569	0
4	44531524	44565511	ENSBTAG00000003784	DNAJC2	0.042	0.16	0.793321	0.950992	0
4	44569083	44582371	ENSBTAG00000046712	PSMC2	-0.301	0.161	0.0574331	0.341833	0
4	44653832	45211015	ENSBTAG00000003658	RELN	-0.015	0.064	0.814985	0.956569	0
4	45330008	45418109	ENSBTAG00000040058	ORC5	-0.051	0.14	0.715858	0.925217	0
4	46202241	46292635	ENSBTAG00000009207	KMT2E	0.238	0.162	0.133614	0.501085	0
4	46296970	46536298	ENSBTAG00000002175	SRPK2	-0.334	0.155	0.0278069	0.233704	0
4	46586617	46640231	ENSBTAG00000007743	PUS7	0.432	0.128	0.000673859	0.0207708	0
4	46646922	46670543	ENSBTAG00000008302	RINT1	-0.112	0.178	0.529349	0.84897	0
4	46670649	46685149	ENSBTAG00000053355	EFCAB10	-0.113	0.11	0.317311	0.726324	0
4	46703819	46757682	ENSBTAG00000002037	ATXN7L1	-0.197	0.143	0.161513	0.539421	0
4	47151949	47180223	ENSBTAG00000019794	SYPL1	0.212	0.179	0.230139	0.617591	0
4	47321231	47361906	ENSBTAG00000015509	NAMPT	-0.174	0.144	0.230139	0.617591	0
4	47988419	48021445	ENSBTAG00000020848	PIK3CG	-0.066	0.098	0.500947	0.837101	0
4	48154065	48255759	ENSBTAG00000014958	PRKAR2B	0.052	0.1	0.603064	0.880947	0
4	48265379	48296503	ENSBTAG00000005524	HBP1	0.265	0.164	0.109599	0.460088	0
4	48291963	48507532	ENSBTAG00000005526	COG5	-0.19	0.119	0.109599	0.460088	0
4	48508186	48511734	ENSBTAG00000046917	GPR22	-0.018	0.028	0.520224	0.845505	0
4	48572836	48643612	ENSBTAG00000021849	DUS4L	0.061	0.139	0.660662	0.906314	0
4	48677577	48736265	ENSBTAG00000010062	SLC26A4	-0.019	0.033	0.564615	0.864514	0
4	48759142	48773761	ENSBTAG00000018348	CBLL1	-0.183	0.212	0.388137	0.772424	0
4	48953177	48979994	ENSBTAG00000001908	DLD	0.074	0.141	0.599583	0.880311	0
4	48985684	49062759	ENSBTAG00000011412	LAMB1	-0.391	0.158	0.0124193	0.15137	0
4	49248702	49563305	ENSBTAG00000006732	NRCAM	0.039	0.033	0.230139	0.617591	0
4	49589564	49629500	ENSBTAG00000024387	PNPLA8	0.123	0.133	0.354966	0.75242	0
4	49680896	49717933	ENSBTAG00000015353	NME8	0.026	0.065	0.689157	0.913179	0
4	49731840	49742113	ENSBTAG00000015366	SFRP4	0.024	0.038	0.527387	0.848269	0
4	49750583	49787423	ENSBTAG00000033197	EPDR1	-0.095	0.075	0.193601	0.577546	0
4	49987458	50048654	ENSBTAG00000038795	STARD3NL	0.043	0.15	0.774112	0.943131	0
4	50399810	50651437	ENSBTAG00000021469	CTTNBP2	0.008	0.087	0.926698	0.984888	0
4	50743789	50957593	ENSBTAG00000006589	CFTR	-0.098	0.026	0.000144696	0.00643871	0
4	51002521	51078365	ENSBTAG00000000169	ASZ1	-0.063	0.021	0.0026998	0.0575565	0
4	51105613	51149684	ENSBTAG00000008097	WNT2	0.043	0.062	0.487682	0.832557	0
4	51165809	51456320	ENSBTAG00000010756	ST7	0.153	0.197	0.437159	0.802387	0
4	51491712	51546693	ENSBTAG00000004072	CAPZA2	0.096	0.146	0.510538	0.840842	0
4	51622340	51735652	ENSBTAG00000006161	MET	-0.136	0.075	0.0718606	0.378219	0
4	51865755	51901396	ENSBTAG00000017869	CAV1	0.076	0.15	0.612155	0.884931	0
4	51922890	51929009	ENSBTAG00000049397	CAV2	-0.07	0.149	0.638355	0.897879	0
4	52169888	52225054	ENSBTAG00000021204	TES	0.02	0.123	0.870518	0.969988	0
4	52282339	52499410	ENSBTAG00000014228	TFEC	0.098	0.066	0.133614	0.501085	0
4	53442844	53541143	ENSBTAG00000021543	MDFIC	-0.302	0.128	0.0163951	0.175834	0
4	53771530	54076899	ENSBTAG00000011246	FOXP2	0.031	0.051	0.543187	0.856902	0
4	55467396	55544715	ENSBTAG00000007608	BMT2	0.068	0.13	0.600974	0.880311	0
4	55560579	55618384	ENSBTAG00000021967	TMEM168	0.035	0.125	0.779478	0.94487	0
4	55849056	55859542	ENSBTAG00000010555	LSMEM1	0.028	0.075	0.709148	0.921803	0
4	55863961	55887646	ENSBTAG00000010549	IFRD1	0.043	0.153	0.77871	0.944783	0
4	55985141	56120652	ENSBTAG00000013050	ZNF277	0.212	0.137	0.133614	0.501085	0
4	56119633	56598768	ENSBTAG00000021182	DOCK4	0.1	0.125	0.423711	0.793048	0
4	56808963	57722182	ENSBTAG00000004398	IMMP2L	0.426	0.146	0.00373163	0.0724824	0
4	57220961	57223087	ENSBTAG00000004399	LRRN3	-0.027	0.075	0.718847	0.926037	0
4	58359235	58359870	ENSBTAG00000020620	RGS2	0.004	0.071	0.955342	0.992488	0
4	59583232	59586115	ENSBTAG00000046588	DNAJB9	0.072	0.088	0.413357	0.788258	0
4	59588215	59594296	ENSBTAG00000021869	THAP5	-0.091	0.133	0.493975	0.835183	0
4	59867412	60450510	ENSBTAG00000003490	ELMO1	-0.147	0.143	0.317311	0.726324	0
4	60544208	60732292	ENSBTAG00000018119	AOAH	0.081	0.071	0.271332	0.658135	0
4	60772368	60825953	ENSBTAG00000009218	ANLN	0.048	0.11	0.662837	0.906535	0
4	60855915	60915546	ENSBTAG00000002011	KIAA0895	0.1	0.078	0.193601	0.577546	0
4	60949038	61140520	ENSBTAG00000019065	EEPD1	-0.223	0.147	0.133614	0.501085	0
4	61402841	61438886	ENSBTAG00000015105	HERPUD2	-0.001	0.218	0.996011	0.999113	0
4	61976304	62068881	ENSBTAG00000005785	DPY19L1	0.195	0.114	0.0891309	0.421769	0
4	62664288	62917005	ENSBTAG00000010866	BMPER	0.226	0.067	0.000673859	0.0207708	0
4	63255358	63708251	ENSBTAG00000006528	BBS9	-0.19	0.113	0.0891309	0.421769	0
4	63733826	63746286	ENSBTAG00000032598	RP9	-0.023	0.201	0.909238	0.981765	0
4	63788270	63807500	ENSBTAG00000016709	NT5C3A	0.301	0.165	0.0718606	0.378219	0
4	63812248	63854573	ENSBTAG00000016707	FKBP9	0.086	0.156	0.581634	0.8732	0
4	63912710	63925721	ENSBTAG00000003115	KBTBD2	-0.054	0.21	0.797179	0.951436	1
4	63956366	64010228	ENSBTAG00000003114	AVL9	-0.284	0.148	0.0574331	0.341833	0
4	64014862	64018569	ENSBTAG00000002332	LSM5	0.282	0.141	0.0455003	0.304255	0
4	64554173	64715670	ENSBTAG00000002739	PDE1C	-0.028	0.101	0.78178	0.945975	0
4	65266775	65377107	ENSBTAG00000020247	ADCYAP1R1	-0.125	0.066	0.0574331	0.341833	0
4	65433649	65447871	ENSBTAG00000000745	AQP1	0.306	0.105	0.00373163	0.0724824	0
4	65467521	65585947	ENSBTAG00000009390	MINDY4	-0.168	0.076	0.0278069	0.233704	1
4	65806682	65816128	ENSBTAG00000010597	GGCT	-0.059	0.088	0.502858	0.837772	0
4	65822126	65911847	ENSBTAG00000038235	NOD1	0.284	0.166	0.0891309	0.421769	0
4	65961977	66053326	ENSBTAG00000000260	ZNRF2	0.01	0.117	0.932261	0.986505	0
4	66186175	66214450	ENSBTAG00000052317	MTURN	0.145	0.111	0.193601	0.577546	0
4	66266959	66328519	ENSBTAG00000000521	PLEKHA8	-0.102	0.138	0.459907	0.81765	1
4	66328677	66340716	ENSBTAG00000007870	FKBP14	-0.405	0.105	9.61927e-05	0.00456244	0
4	66355254	66421169	ENSBTAG00000016223	SCRN1	0.008	0.084	0.924315	0.984493	0
4	66423128	66443623	ENSBTAG00000016220	WIPF3	-0.029	0.072	0.686948	0.912327	0
4	66608858	66610438	ENSBTAG00000045567	PRR15	-0.109	0.054	0.0455003	0.304255	0
4	66634935	66970909	ENSBTAG00000020931	CHN2	-0.151	0.078	0.0574331	0.341833	0
4	67204660	67207092	ENSBTAG00000024340	TRIL	-0.092	0.1	0.357573	0.754417	0
4	67314290	67752296	ENSBTAG00000018909	CREB5	-0.02	0.077	0.794864	0.950992	0
4	67992971	68321145	ENSBTAG00000019024	JAZF1	-0.194	0.108	0.0718606	0.378219	0
4	68323940	68407181	ENSBTAG00000019020	TAX1BP1	-0.125	0.099	0.193601	0.577546	0
4	68473794	68614954	ENSBTAG00000001036	HIBADH	-0.086	0.074	0.230139	0.617591	0
4	68862439	68872086	ENSBTAG00000040082	HOXA10	-0.004	0.045	0.929082	0.985624	0
4	68877182	68880322	ENSBTAG00000053595	HOXA9	0.005	0.062	0.935442	0.987224	0
4	68885186	68887923	ENSBTAG00000001455	HOXA7	-0.086	0.057	0.133614	0.501085	0
4	68894951	68898550	ENSBTAG00000024341	HOXA6	-0.01	0.077	0.896566	0.97888	0
4	68898726	68901681	ENSBTAG00000012211	HOXA5	-0.061	0.074	0.40994	0.786768	0
4	68902556	68934981	ENSBTAG00000008139	HOXA3	-0.083	0.054	0.133614	0.501085	0
4	69125496	69297030	ENSBTAG00000005650	SKAP2	0.049	0.195	0.801814	0.953243	0
4	69587812	69655430	ENSBTAG00000001822	SNX10	0.153	0.066	0.0214482	0.20425	0
4	69735135	69744610	ENSBTAG00000005726	HNRNPA2B1	0.025	0.124	0.839917	0.960926	0
4	69748359	69782790	ENSBTAG00000004136	NFE2L3	0.074	0.102	0.468452	0.822918	0
4	70699194	70727802	ENSBTAG00000019445	C4H7orf31	0.007	0.066	0.915582	0.983485	0
4	70735436	70738238	ENSBTAG00000022613	CYCS	-0.011	0.093	0.906068	0.980332	0
4	70844945	71041101	ENSBTAG00000019342	OSBPL3	0.034	0.062	0.583692	0.873824	0
4	71088326	71192446	ENSBTAG00000015326	GSDME	0.029	0.09	0.747453	0.935616	0
4	71173805	71303589	ENSBTAG00000015303	MPP6	-0.002	0.092	0.982448	0.996272	0
4	72036169	72059949	ENSBTAG00000018064	FAM221A	-0.082	0.12	0.494607	0.835183	0
4	72076430	72308387	ENSBTAG00000007136	ADAM22	-0.078	0.062	0.193601	0.577546	0
4	72319442	72342353	ENSBTAG00000010390	SRI	-0.31	0.161	0.0574331	0.341833	0
4	72378038	72407341	ENSBTAG00000002340	STEAP4	-0.092	0.097	0.343129	0.745142	0
4	74405139	74430946	ENSBTAG00000003506	STEAP2	-0.287	0.088	0.000966848	0.0273241	0
4	74443217	74502981	ENSBTAG00000003508	CFAP69	-0.16	0.085	0.0574331	0.341833	0
4	74533033	74559891	ENSBTAG00000032166	GTPBP10	-0.125	0.175	0.475227	0.826397	0
4	74573944	74587244	ENSBTAG00000013226	HUS1	-0.937	0.228	4.1315e-05	0.00228766	0
4	74779686	74996283	ENSBTAG00000009655	TNS3	0.092	0.077	0.230139	0.617591	0
4	76116349	76124835	ENSBTAG00000003994	IGFBP3	-0.039	0.078	0.617075	0.886181	0
4	76444976	76493685	ENSBTAG00000020704	RAMP3	-0.045	0.066	0.495239	0.835183	0
4	76522744	76531904	ENSBTAG00000010504	TBRG4	-0.214	0.14	0.133614	0.501085	0
4	76550183	76603468	ENSBTAG00000008090	CCM2	-0.067	0.157	0.669379	0.907727	0
4	76617184	76633185	ENSBTAG00000006377	MYO1G	0.023	0.09	0.797951	0.951615	0
4	76665960	76669082	ENSBTAG00000052945	PURB	0.107	0.126	0.395881	0.778436	0
4	76709520	76713230	ENSBTAG00000012003	PPIA	-0.101	0.103	0.326593	0.735763	0
4	76730454	76748161	ENSBTAG00000011997	ZMIZ2	-0.025	0.09	0.781012	0.945975	0
4	76758582	76844759	ENSBTAG00000006029	OGDH	-0.085	0.17	0.617075	0.886181	0
4	76859613	76862453	ENSBTAG00000010612	TMED4	-0.271	0.17	0.109599	0.460088	0
4	76865589	76874946	ENSBTAG00000010602	DDX56	-0.109	0.168	0.516338	0.843808	0
[truncated: 10,239 more rows]
