# Supplementary material for: Bridging GWAS to genes: an integrative multi-omics approach using cattle data
Source: Research Square preprint supplement (doi:10.21203/rs.3.rs-7693421/v1), 2025-10-14
Supplement: Supplementary file 4 [file 813e6ae8c92417b4326480f4.xlsx]

## Sheet: enrichment_500Kb_clathrin-media
query	significant	p_value	term_size	query_size	intersection_size	precision	recall	term_id	source	term_name	effective_domain_size	source_order	evidence_codes	intersection
query_1	TRUE	0.00454788	9	55	3	0.0545455	0.333333	GO:0001408	GO:BP	guanine nucleotide transport	11775	314	IDA IBA,IBA,IMP	LRRC8C,LRRC8B,SLC17A9
query_1	TRUE	0.00454788	8	55	3	0.0545455	0.375	GO:1903790	GO:BP	guanine nucleotide transmembrane transport	11775	22939	IDA IBA,IBA,IMP	LRRC8C,LRRC8B,SLC17A9
query_1	TRUE	0.00454788	31	55	4	0.0727273	0.129032	GO:0015865	GO:BP	purine nucleotide transport	11775	4949	IDA IBA,IBA,IDA IMP IBA IEA,IMP	LRRC8C,LRRC8B,SLC17A9,ANKH
query_1	TRUE	0.00454788	27	55	4	0.0727273	0.148148	GO:0015868	GO:BP	purine ribonucleotide transport	11775	4952	IDA IBA,IBA,IDA IMP IBA IEA,IMP	LRRC8C,LRRC8B,SLC17A9,ANKH
query_1	TRUE	0.00454788	30	55	4	0.0727273	0.133333	GO:0051503	GO:BP	adenine nucleotide transport	11775	13569	IDA IBA,IBA,IDA IMP IBA IEA,IMP	LRRC8C,LRRC8B,SLC17A9,ANKH
query_1	TRUE	0.00519424	120	55	6	0.109091	0.05	GO:0098739	GO:BP	import across plasma membrane	11775	18617	IBA,IDA IBA,IBA,IDA IMP IBA IEA,IEA,IDA IBA	KCNJ15,LRRC8C,LRRC8B,SLC39A8,SLC39A11,KCNJ2
query_1	TRUE	0.00519424	73	55	5	0.0909091	0.0684932	GO:1901264	GO:BP	carbohydrate derivative transport	11775	21065	IEA,IDA IBA,IBA,IDA IMP IBA IEA,IMP	SLC50A1,LRRC8C,LRRC8B,SLC17A9,ANKH
query_1	TRUE	0.00519424	969	55	15	0.272727	0.0154799	GO:0055085	GO:BP	transmembrane transport	11775	14029	IBA IEA,TAS IEA,IDA IMP ISS IBA IEA,IMP IBA IEA,IDA IMP ISS IBA TAS IEA,IEA,IMP ISS IEA,IDA IMP IBA IEA,IEA,ISS,IBA IEA,IDA IBA IEA,IEA,IEA,TAS IEA	KCNJ15,SLC50A1,LRRC8C,LRRC8B,SLC39A8,SLC34A2,SLC17A9,P2RX4,PIEZO1,HAP1,SLC39A11,KCNJ2,ABCA9,ABCA10,ANKH
query_1	TRUE	0.00519424	37	55	4	0.0727273	0.108108	GO:0006862	GO:BP	nucleotide transport	11775	2515	IDA IBA,IBA,IDA IMP IBA IEA,IMP	LRRC8C,LRRC8B,SLC17A9,ANKH
query_1	TRUE	0.0259806	22	55	3	0.0545455	0.136364	GO:1901679	GO:BP	nucleotide transmembrane transport	11775	21358	IDA IBA,IBA,IMP	LRRC8C,LRRC8B,SLC17A9
query_1	TRUE	0.0315096	64	55	4	0.0727273	0.0625	GO:0098659	GO:BP	inorganic cation import across plasma membrane	11775	18566	IBA,IDA IMP IBA IEA,IEA,IDA IBA	KCNJ15,SLC39A8,SLC39A11,KCNJ2
query_1	TRUE	0.0315096	64	55	4	0.0727273	0.0625	GO:0099587	GO:BP	inorganic ion import across plasma membrane	11775	18901	IBA,IDA IMP IBA IEA,IEA,IDA IBA	KCNJ15,SLC39A8,SLC39A11,KCNJ2
query_1	TRUE	0.0476473	30	55	3	0.0545455	0.1	GO:0072530	GO:BP	purine-containing compound transmembrane transport	11775	17198	IDA IBA,IBA,IMP ISS IEA	LRRC8C,LRRC8B,SLC17A9
query_1	TRUE	0.0339556	21	55	3	0.0545455	0.142857	REAC:R-HSA-5223345	REAC	Miscellaneous transport and binding events	11775	1469	REAC,REAC,REAC	LRRC8C,LRRC8B,ANKH
query_1	TRUE	0.0434817	44	55	3	0.0545455	0.0681818	REAC:R-HSA-186797	REAC	Signaling by PDGF	11775	2308	REAC,REAC,REAC	THBS3,STAT5B,STAT3
query_1	TRUE	0.0434817	43	55	3	0.0545455	0.0697674	REAC:R-HSA-1226099	REAC	Signaling by FGFR in disease	11775	2257	REAC,REAC,REAC	NCBP2,STAT5B,STAT3
query_1	TRUE	0.0434817	121	55	4	0.0727273	0.0330579	REAC:R-HSA-8856828	REAC	Clathrin-mediated endocytosis	11775	374	REAC,REAC,REAC,REAC	NECAP2,ARFGAP1,RAB5C,PICALM
query_1	TRUE	0.0434817	487	55	8	0.145455	0.0164271	REAC:R-HSA-382551	REAC	Transport of small molecules	11775	2618	REAC,REAC,REAC,REAC,REAC,REAC,REAC,REAC	SLC50A1,LRRC8C,LRRC8B,SLC39A8,SLC34A2,ABCA9,ABCA10,ANKH
