# Supplementary material for: Bridging GWAS to genes: an integrative multi-omics approach using cattle data
Source: Research Square preprint supplement (doi:10.21203/rs.3.rs-7693421/v1), 2025-10-14
Supplement: Supplementary file 5 [file 970de39b3607405d159676b0.xlsx]

## Sheet: Terms_WBC100Kb
query	significant	p_value	term_size	query_size	intersection_size	precision	recall	term_id	source	term_name	effective_domain_size	source_order	evidence_codes	intersection
query_1	TRUE	0.035399	26	26	3	0.115385	0.115385	GO:0060416	GO:BP	response to growth hormone	11176	14406	IDA,IDA IBA IEA,IBA IEA	TRIM16,STAT5B,STAT5A
query_1	TRUE	0.035399	3373	26	17	0.653846	0.00504002	GO:0048856	GO:BP	anatomical structure development	11176	12931	TAS IEA,TAS,IEA,IEA,IMP,IBA IEA,IEA,ISS IEA,ISS IEA,IDA,IEA,IBA NAS IEA,IDA IEA,IDA IEA,IEA,IEA,IEA	ETS2,EXTL1,ADAM15,GRSF1,KLF1,NREP,RNASEH2B,P2RX7,IFT81,TRIM16,PRPSAP2,HAP1,STAT5B,STAT5A,IDO1,GINS4,EED
query_1	TRUE	0.035399	3664	26	18	0.692308	0.00491266	GO:0032502	GO:BP	developmental process	11176	7558	TAS IEA,TAS,IEA,IEA,IMP,IBA IEA,IEA,IEP IEA,ISS IEA,ISS IEA,IDA,IEA,IBA NAS IEA,IDA ISS IEA,IDA ISS IEA,IEA,IEA,IEA	ETS2,EXTL1,ADAM15,GRSF1,KLF1,NREP,RNASEH2B,TCFL5,P2RX7,IFT81,TRIM16,PRPSAP2,HAP1,STAT5B,STAT5A,IDO1,GINS4,EED
query_1	TRUE	0.035399	2672	26	15	0.576923	0.00561377	GO:0007275	GO:BP	multicellular organism development	11176	2788	TAS IEA,TAS,IEA,IEA,IBA IEA,IEA,ISS IEA,IDA,IEA,IBA NAS IEA,IDA IEA,IDA,IEA,IEA,IEA	ETS2,EXTL1,ADAM15,GRSF1,NREP,RNASEH2B,P2RX7,TRIM16,PRPSAP2,HAP1,STAT5B,STAT5A,IDO1,GINS4,EED
query_1	TRUE	0.0458215	3901	26	18	0.692308	0.0046142	GO:0032501	GO:BP	multicellular organismal process	11176	7557	TAS IEA,TAS,IEA,IMP,IEA,IMP IEA,IBA IEA,IEA,IDA ISS IEA,IDA IMP,IEA,ISS IBA NAS IEA,IDA ISS IEA,IDA ISS IEA,IDA ISS,TAS IEA,IEA,IEA	ETS2,EXTL1,ADAM15,GBP1,GRSF1,KLF1,NREP,RNASEH2B,P2RX7,TRIM16,PRPSAP2,HAP1,DHX58,STAT5B,STAT5A,IDO1,GINS4,EED
